# Supplementary material for: Brain imaging phenotypes associated with polygenic risk for Essential Tremor
Source: bioRxiv or medRxiv preprint supplement (doi:10.1101/2024.07.16.24310501), 2024-12-06
Supplement: Supplementary file [file media-2.pdf]

**Table S1*****ET PRS Association with White Matter Mean Diffusivity (MD) - O'Donnell Research Group (ORG)******Atlas***

| Tract            | <i>t</i>    | $\beta$         | <i>p</i>    | Eta2            | Cohens_f        | 95% CI                     |
|------------------|-------------|-----------------|-------------|-----------------|-----------------|----------------------------|
| T_AF_left.nii    | 1.65        | 5.52e-05        | .137        | 1.35e-04        | 1.16e-02        | [-0.01, <0.01]             |
| T_AF_right.nii   | 1.45        | 4.98e-05        | .230        | 1.05e-04        | 1.02e-02        | [-0.01, <0.01]             |
| T_CB_left.nii    | 1.45        | 5.37e-05        | .231        | 1.03e-04        | 1.02e-02        | [-0.01, <0.01]             |
| T_CB_right.nii   | 1.94        | 7.14e-05        | .083        | 1.84e-04        | 1.36e-02        | [-0.01, <0.01]             |
| <b>T_CC1.nii</b> | <b>2.51</b> | <b>1.10e-04</b> | <b>.022</b> | <b>3.18e-04</b> | <b>1.78e-02</b> | <b>&lt;0.01, &lt;0.01]</b> |
| T_CC2.nii        | 1.55        | 5.95e-05        | .147        | 1.20e-04        | 1.09e-02        | [-0.01, <0.01]             |
| <b>T_CC3.nii</b> | <b>2.28</b> | <b>8.85e-05</b> | <b>.042</b> | <b>2.59e-04</b> | <b>1.61e-02</b> | <b>&lt;0.01, &lt;0.01]</b> |
| T_CC4.nii        | 1.83        | 4.55e-04        | .093        | 1.67e-04        | 1.29e-02        | [-0.01, <0.01]             |
| T_CC5.nii        | 1.77        | 1.16e-02        | .122        | 1.56e-04        | 1.25e-02        | [-0.01, 0.02]              |
| T_CC6.nii        | 1.34        | 4.72e-05        | .282        | 8.99e-05        | 9.48e-03        | [-0.01, <0.01]             |
| T_CC7.nii        | 1.42        | 5.24e-05        | .285        | 1.01e-04        | 1.00e-02        | [-0.01, <0.01]             |
| T_CPC.nii        | 1.12        | 3.50e-05        | .335        | 6.27e-05        | 7.92e-03        | [-0.01, <0.01]             |
| T_CR-F_left.nii  | 1.68        | 6.09e-05        | .127        | 1.41e-04        | 1.19e-02        | [-0.01, <0.01]             |
| T_CR-F_right.nii | 1.61        | 5.81e-05        | .148        | 1.28e-04        | 1.13e-02        | [-0.01, <0.01]             |
| T_CR-P_left.nii  | 1.50        | 3.75e-04        | .149        | 1.11e-04        | 1.06e-02        | [-0.01, <0.01]             |
| T_CR-P_right.nii | 0.94        | 3.53e-05        | .384        | 4.37e-05        | 6.61e-03        | [-0.01, <0.01]             |
| T_CST_left.nii   | 1.88        | 6.78e-05        | .083        | 1.75e-04        | 1.32e-02        | [-0.01, <0.01]             |
| T_CST_right.nii  | 1.46        | 5.27e-05        | .198        | 1.06e-04        | 1.03e-02        | [-0.01, <0.01]             |
| T_EC_left.nii    | 2.14        | 1.47e-02        | .060        | 2.31e-04        | 1.52e-02        | <0.01, 0.03]               |
| T_EC_right.nii   | 1.85        | 7.74e-05        | .121        | 1.73e-04        | 1.32e-02        | [-0.01, <0.01]             |
| T_EmC_left.nii   | 1.34        | 8.92e-03        | .284        | 8.99e-05        | 9.48e-03        | [-0.01, 0.02]              |
| T_EmC_right.nii  | 1.16        | 4.45e-05        | .384        | 6.80e-05        | 8.25e-03        | [-0.01, <0.01]             |
| T_ICP_left.nii   | -1.28       | -7.77e-05       | .243        | 8.24e-05        | 9.08e-03        | [-0.01, <0.01]             |
| T_ICP_right.nii  | -0.14       | -8.59e-06       | .975        | 1.02e-06        | 1.01e-03        | [-0.01, <0.01]             |
| T_ILF_left.nii   | 1.17        | 4.06e-05        | .274        | 6.87e-05        | 8.29e-03        | [-0.01, <0.01]             |

**Table S1**

***ET PRS Association with White Matter Mean Diffusivity (MD) - O'Donnell Research Group (ORG)***

***Atlas***

| Tract                                | <i>t</i>    | $\beta$         | <i>p</i>    | Eta2            | Cohens_f        | 95% CI                      |
|--------------------------------------|-------------|-----------------|-------------|-----------------|-----------------|-----------------------------|
| T_ILF_right.nii                      | 2.02        | 7.16e-05        | .080        | 2.03e-04        | 1.43e-02        | [<0.01, <0.01]              |
| <b>T_Intra-CBLM-I&amp;P_left.nii</b> | <b>2.17</b> | <b>9.63e-05</b> | <b>.037</b> | <b>2.32e-04</b> | <b>1.52e-02</b> | <b>[&lt;0.01, &lt;0.01]</b> |
| T_Intra-CBLM-I&P_right.nii           | 1.94        | 8.94e-05        | .064        | 1.86e-04        | 1.37e-02        | [-0.01, <0.01]              |
| T_Intra-CBLM-PaT_left.nii            | 1.70        | 1.19e-02        | .109        | 1.66e-04        | 1.29e-02        | [-0.01, 0.03]               |
| T_Intra-CBLM-PaT_right.nii           | 1.15        | 1.42e-04        | .393        | 9.43e-05        | 9.71e-03        | [-0.01, <0.01]              |
| T_IOFF_left.nii                      | 1.66        | 1.11e-02        | .179        | 1.38e-04        | 1.17e-02        | [-0.01, 0.02]               |
| T_IOFF_right.nii                     | 1.75        | 6.52e-05        | .177        | 1.53e-04        | 1.24e-02        | [-0.01, <0.01]              |
| <b>T_MCP.nii</b>                     | <b>2.38</b> | <b>9.71e-05</b> | <b>.021</b> | <b>2.82e-04</b> | <b>1.68e-02</b> | <b>[&lt;0.01, &lt;0.01]</b> |
| T_MdLF_left.nii                      | 1.03        | 3.46e-05        | .372        | 5.22e-05        | 7.23e-03        | [-0.01, <0.01]              |
| T_MdLF_right.nii                     | 1.50        | 5.08e-05        | .208        | 1.12e-04        | 1.06e-02        | [-0.01, <0.01]              |
| T_PLIC_left.nii                      | 1.10        | 2.55e-04        | .372        | 6.04e-05        | 7.77e-03        | [-0.01, <0.01]              |
| T_PLIC_right.nii                     | 1.26        | 8.29e-03        | .265        | 7.94e-05        | 8.91e-03        | [-0.01, 0.02]               |
| T_SF_left.nii                        | 1.97        | 6.65e-05        | .067        | 1.91e-04        | 1.38e-02        | [<0.01, <0.01]              |
| T_SF_right.nii                       | 1.92        | 6.36e-05        | .079        | 1.81e-04        | 1.35e-02        | [-0.01, <0.01]              |
| T_SLF-I_left.nii                     | 1.51        | 5.28e-05        | .182        | 1.12e-04        | 1.06e-02        | [-0.01, <0.01]              |
| T_SLF-I_right.nii                    | 1.48        | 5.33e-05        | .192        | 1.08e-04        | 1.04e-02        | [-0.01, <0.01]              |
| T_SLF-II_left.nii                    | 1.34        | 4.54e-05        | .395        | 8.91e-05        | 9.44e-03        | [-0.01, <0.01]              |
| T_SLF-II_right.nii                   | 1.43        | 4.96e-05        | .242        | 1.01e-04        | 1.00e-02        | [-0.01, <0.01]              |
| T_SLF-III_left.nii                   | 1.78        | 6.30e-05        | .092        | 1.57e-04        | 1.25e-02        | [-0.01, <0.01]              |
| T_SLF-III_right.nii                  | 1.48        | 5.45e-05        | .171        | 1.08e-04        | 1.04e-02        | [-0.01, <0.01]              |
| T_SO_left.nii                        | 1.31        | 8.64e-03        | .297        | 8.64e-05        | 9.29e-03        | [-0.01, 0.02]               |
| T_SO_right.nii                       | 1.58        | 1.04e-02        | .181        | 1.24e-04        | 1.11e-02        | [-0.01, 0.02]               |
| T_SP_left.nii                        | 1.72        | 5.64e-05        | .117        | 1.46e-04        | 1.21e-02        | [-0.01, <0.01]              |
| T_SP_right.nii                       | 2.04        | 6.99e-05        | .056        | 2.06e-04        | 1.44e-02        | [<0.01, <0.01]              |
| <b>T_Sup-F_left.nii</b>              | <b>2.61</b> | <b>1.01e-04</b> | <b>.017</b> | <b>3.34e-04</b> | <b>1.83e-02</b> | <b>[&lt;0.01, &lt;0.01]</b> |

**Table S1**

***ET PRS Association with White Matter Mean Diffusivity (MD) - O'Donnell Research Group (ORG)***

***Atlas***

| Tract                    | <i>t</i>    | $\beta$         | <i>p</i>    | Eta2            | Cohens_f        | 95% CI                     |
|--------------------------|-------------|-----------------|-------------|-----------------|-----------------|----------------------------|
| <b>T_Sup-F_right.nii</b> | <b>2.28</b> | <b>8.66e-05</b> | <b>.032</b> | <b>2.55e-04</b> | <b>1.60e-02</b> | <b>&lt;0.01, &lt;0.01]</b> |
| T_Sup-FP_left.nii        | 1.36        | 4.94e-05        | .240        | 9.08e-05        | 9.53e-03        | [-0.01, <0.01]             |
| T_Sup-FP_right.nii       | 1.55        | 5.56e-05        | .192        | 1.18e-04        | 1.08e-02        | [-0.01, <0.01]             |
| <b>T_Sup-O_left.nii</b>  | <b>2.25</b> | <b>8.93e-05</b> | <b>.039</b> | <b>2.50e-04</b> | <b>1.58e-02</b> | <b>&lt;0.01, &lt;0.01]</b> |
| T_Sup-O_right.nii        | 2.08        | 8.60e-05        | .059        | 2.15e-04        | 1.47e-02        | <0.01, <0.01]              |
| T_Sup-OT_left.nii        | 1.75        | 6.17e-05        | .126        | 1.51e-04        | 1.23e-02        | [-0.01, <0.01]             |
| T_Sup-OT_right.nii       | 1.46        | 5.59e-05        | .248        | 1.06e-04        | 1.03e-02        | [-0.01, <0.01]             |
| T_Sup-P_left.nii         | 1.31        | 4.74e-05        | .234        | 8.40e-05        | 9.17e-03        | [-0.01, <0.01]             |
| T_Sup-P_right.nii        | 1.29        | 4.80e-05        | .273        | 8.14e-05        | 9.02e-03        | [-0.01, <0.01]             |
| T_Sup-PO_left.nii        | 1.88        | 6.89e-05        | .110        | 1.75e-04        | 1.32e-02        | [-0.01, <0.01]             |
| T_Sup-PO_right.nii       | 2.16        | 7.74e-05        | .056        | 2.31e-04        | 1.52e-02        | <0.01, <0.01]              |
| T_Sup-PT_left.nii        | 0.95        | 3.37e-05        | .397        | 4.49e-05        | 6.70e-03        | [-0.01, <0.01]             |
| T_Sup-PT_right.nii       | 1.17        | 4.17e-05        | .335        | 6.71e-05        | 8.19e-03        | [-0.01, <0.01]             |
| T_Sup-T_left.nii         | 1.44        | 5.09e-05        | .169        | 1.02e-04        | 1.01e-02        | [-0.01, <0.01]             |
| T_Sup-T_right.nii        | 1.77        | 6.45e-05        | .140        | 1.56e-04        | 1.25e-02        | [-0.01, <0.01]             |
| T_TF_left.nii            | 2.00        | 6.70e-05        | .072        | 1.96e-04        | 1.40e-02        | <0.01, <0.01]              |
| T_TF_right.nii           | 1.88        | 6.33e-05        | .094        | 1.75e-04        | 1.32e-02        | [-0.01, <0.01]             |
| T_TO_left.nii            | 0.99        | 3.67e-05        | .395        | 4.86e-05        | 6.97e-03        | [-0.01, <0.01]             |
| T_TO_right.nii           | 1.60        | 3.89e-04        | .171        | 1.28e-04        | 1.13e-02        | [-0.01, <0.01]             |
| T_TP_left.nii            | 1.50        | 4.92e-05        | .212        | 1.10e-04        | 1.05e-02        | [-0.01, <0.01]             |
| T_TP_right.nii           | 1.51        | 5.13e-05        | .180        | 1.12e-04        | 1.06e-02        | [-0.01, <0.01]             |
| T_UF_left.nii            | 2.02        | 7.70e-05        | .053        | 2.03e-04        | 1.43e-02        | <0.01, <0.01]              |
| <b>T_UF_right.nii</b>    | <b>2.15</b> | <b>7.99e-05</b> | <b>.038</b> | <b>2.31e-04</b> | <b>1.52e-02</b> | <b>&lt;0.01, &lt;0.01]</b> |

*Note*

\* *p* < .05, \*\* *p* < .01, \*\*\* *p* < .001, 95% CI(B)

**Table S2**

***ET PRS Association with White Matter Free Water (FW) - O'Donnell Research Group (ORG) Atlas***

| Tract                 | <i>t</i>    | $\beta$         | <i>p</i>    | Eta2            | Cohens_f        | 95% CI                  |
|-----------------------|-------------|-----------------|-------------|-----------------|-----------------|-------------------------|
| T_AF_left.nii         | 1.61        | 1.05e-02        | .170        | 1.31e-04        | 1.14e-02        | [-0.01, 0.02]           |
| T_AF_right.nii        | 1.52        | 9.78e-03        | .203        | 1.17e-04        | 1.08e-02        | [-0.01, 0.02]           |
| T_CB_left.nii         | 1.59        | 1.04e-02        | .177        | 1.27e-04        | 1.13e-02        | [-0.01, 0.02]           |
| T_CB_right.nii        | 2.08        | 1.36e-02        | .052        | 2.18e-04        | 1.48e-02        | [<0.01, 0.03]           |
| T_CC1.nii             | 1.66        | 1.10e-02        | .153        | 1.42e-04        | 1.19e-02        | [-0.01, 0.02]           |
| T_CC2.nii             | 1.22        | 7.97e-03        | .271        | 7.60e-05        | 8.72e-03        | [-0.01, 0.02]           |
| T_CC3.nii             | 1.59        | 1.02e-02        | .136        | 1.30e-04        | 1.14e-02        | [-0.01, 0.02]           |
| T_CC4.nii             | 1.48        | 9.46e-03        | .190        | 1.13e-04        | 1.06e-02        | [-0.01, 0.02]           |
| T_CC5.nii             | 1.62        | 1.08e-02        | .145        | 1.34e-04        | 1.16e-02        | [-0.01, 0.02]           |
| T_CC6.nii             | 0.71        | 4.75e-03        | .586        | 2.59e-05        | 5.09e-03        | [-0.01, 0.02]           |
| T_CC7.nii             | 1.64        | 1.11e-02        | .139        | 1.38e-04        | 1.17e-02        | [-0.01, 0.02]           |
| T_CPC.nii             | 1.96        | 1.19e-02        | .091        | 1.97e-04        | 1.41e-02        | [<0.01, 0.02]           |
| T_CR-F_left.nii       | 1.93        | 1.21e-02        | .084        | 1.90e-04        | 1.38e-02        | [-0.01, 0.02]           |
| T_CR-F_right.nii      | 1.71        | 1.06e-02        | .107        | 1.49e-04        | 1.22e-02        | [-0.01, 0.02]           |
| T_CR-P_left.nii       | 1.48        | 9.81e-03        | .169        | 1.12e-04        | 1.06e-02        | [-0.01, 0.02]           |
| T_CR-P_right.nii      | 0.92        | 6.12e-03        | .437        | 4.34e-05        | 6.58e-03        | [-0.01, 0.02]           |
| <b>T_CST_left.nii</b> | <b>2.21</b> | <b>1.40e-02</b> | <b>.042</b> | <b>2.49e-04</b> | <b>1.58e-02</b> | <b>[&lt;0.01, 0.03]</b> |
| T_CST_right.nii       | 1.45        | 9.19e-03        | .230        | 1.07e-04        | 1.04e-02        | [-0.01, 0.02]           |
| T_EC_left.nii         | 2.15        | 1.44e-02        | .050        | 2.39e-04        | 1.55e-02        | [<0.01, 0.03]           |
| T_EC_right.nii        | 1.54        | 1.04e-02        | .195        | 1.23e-04        | 1.11e-02        | [-0.01, 0.02]           |
| T_EmC_left.nii        | 1.43        | 9.43e-03        | .238        | 1.06e-04        | 1.03e-02        | [-0.01, 0.02]           |
| T_EmC_right.nii       | 1.33        | 8.77e-03        | .254        | 9.03e-05        | 9.51e-03        | [-0.01, 0.02]           |
| T_ICP_left.nii        | -1.42       | -9.71e-03       | .172        | 1.03e-04        | 1.01e-02        | [-0.02, <0.01]          |
| T_ICP_right.nii       | -0.42       | -2.85e-03       | .743        | 8.98e-06        | 3.00e-03        | [-0.02, 0.01]           |
| T_ILF_left.nii        | 1.40        | 9.15e-03        | .196        | 1.01e-04        | 1.00e-02        | [-0.01, 0.02]           |

Table S2

*ET PRS Association with White Matter Free Water (FW) - O'Donnell Research Group (ORG) Atlas*

| Tract                                 | <i>t</i>    | $\beta$         | <i>p</i>         | Eta2            | Cohens_f        | 95% CI                  |
|---------------------------------------|-------------|-----------------|------------------|-----------------|-----------------|-------------------------|
| T_ILF_right.nii                       | 1.75        | 1.15e-02        | .125             | 1.57e-04        | 1.25e-02        | [-0.01, 0.02]           |
| <b>T_Intra-CBLM-I&amp;P_left.nii</b>  | <b>3.12</b> | <b>1.88e-02</b> | <b>.002</b>      | <b>4.94e-04</b> | <b>2.22e-02</b> | <b>[0.01, 0.03]</b>     |
| <b>T_Intra-CBLM-I&amp;P_right.nii</b> | <b>3.44</b> | <b>2.08e-02</b> | <b>.001</b>      | <b>5.99e-04</b> | <b>2.45e-02</b> | <b>[0.01, 0.03]</b>     |
| <b>T_Intra-CBLM-PaT_left.nii</b>      | <b>2.40</b> | <b>1.64e-02</b> | <b>.022</b>      | <b>3.40e-04</b> | <b>1.85e-02</b> | <b>[&lt;0.01, 0.03]</b> |
| <b>T_Intra-CBLM-PaT_right.nii</b>     | <b>2.59</b> | <b>1.97e-02</b> | <b>.013</b>      | <b>4.88e-04</b> | <b>2.21e-02</b> | <b>[&lt;0.01, 0.03]</b> |
| T_IOFF_left.nii                       | 1.83        | 1.21e-02        | .105             | 1.73e-04        | 1.31e-02        | [-0.01, 0.02]           |
| T_IOFF_right.nii                      | 1.73        | 1.14e-02        | .116             | 1.53e-04        | 1.24e-02        | [-0.01, 0.02]           |
| <b>T_MCP.nii</b>                      | <b>3.78</b> | <b>2.40e-02</b> | <b>&lt; .001</b> | <b>7.32e-04</b> | <b>2.71e-02</b> | <b>[0.01, 0.04]</b>     |
| T_MdLF_left.nii                       | 0.54        | 3.60e-03        | .645             | 1.50e-05        | 3.88e-03        | [-0.01, 0.02]           |
| T_MdLF_right.nii                      | 1.49        | 9.78e-03        | .167             | 1.13e-04        | 1.06e-02        | [-0.01, 0.02]           |
| T_PLIC_left.nii                       | 1.51        | 9.59e-03        | .161             | 1.16e-04        | 1.08e-02        | [-0.01, 0.02]           |
| T_PLIC_right.nii                      | 1.38        | 8.95e-03        | .232             | 9.67e-05        | 9.84e-03        | [-0.01, 0.02]           |
| <b>T_SF_left.nii</b>                  | <b>2.13</b> | <b>1.29e-02</b> | <b>.046</b>      | <b>2.28e-04</b> | <b>1.51e-02</b> | <b>[&lt;0.01, 0.02]</b> |
| T_SF_right.nii                        | 1.80        | 1.09e-02        | .087             | 1.64e-04        | 1.28e-02        | [-0.01, 0.02]           |
| T_SLF-I_left.nii                      | 1.67        | 1.09e-02        | .130             | 1.41e-04        | 1.19e-02        | [-0.01, 0.02]           |
| T_SLF-I_right.nii                     | 1.78        | 1.14e-02        | .119             | 1.59e-04        | 1.26e-02        | [-0.01, 0.02]           |
| T_SLF-II_left.nii                     | 1.54        | 1.01e-02        | .194             | 1.20e-04        | 1.10e-02        | [-0.01, 0.02]           |
| T_SLF-II_right.nii                    | 1.45        | 9.33e-03        | .203             | 1.06e-04        | 1.03e-02        | [-0.01, 0.02]           |
| T_SLF-III_left.nii                    | 1.74        | 1.13e-02        | .100             | 1.54e-04        | 1.24e-02        | [-0.01, 0.02]           |
| T_SLF-III_right.nii                   | 1.13        | 7.29e-03        | .285             | 6.48e-05        | 8.05e-03        | [-0.01, 0.02]           |
| T_SO_left.nii                         | 1.57        | 1.03e-02        | .142             | 1.26e-04        | 1.12e-02        | [-0.01, 0.02]           |
| T_SO_right.nii                        | 1.48        | 9.81e-03        | .169             | 1.12e-04        | 1.06e-02        | [-0.01, 0.02]           |
| T_SP_left.nii                         | 1.79        | 1.11e-02        | .102             | 1.61e-04        | 1.27e-02        | [-0.01, 0.02]           |
| <b>T_SP_right.nii</b>                 | <b>2.15</b> | <b>1.33e-02</b> | <b>.044</b>      | <b>2.33e-04</b> | <b>1.53e-02</b> | <b>[&lt;0.01, 0.03]</b> |
| <b>T_Sup-F_left.nii</b>               | <b>2.93</b> | <b>1.87e-02</b> | <b>.005</b>      | <b>4.33e-04</b> | <b>2.08e-02</b> | <b>[0.01, 0.03]</b>     |
| T_Sup-F_right.nii                     | 2.01        | 1.27e-02        | .062             | 2.02e-04        | 1.42e-02        | [<0.01, 0.03]           |

Table S2

*ET PRS Association with White Matter Free Water (FW) - O'Donnell Research Group (ORG) Atlas*

| Tract                    | <i>t</i>    | $\beta$         | <i>p</i>    | Eta2            | Cohens_f        | 95% CI                 |
|--------------------------|-------------|-----------------|-------------|-----------------|-----------------|------------------------|
| T_Sup-FP_left.nii        | 1.36        | 8.89e-03        | .240        | 9.30e-05        | 9.64e-03        | [-0.01, 0.02]          |
| T_Sup-FP_right.nii       | 1.70        | 1.10e-02        | .123        | 1.45e-04        | 1.21e-02        | [-0.01, 0.02]          |
| <b>T_Sup-O_left.nii</b>  | <b>2.35</b> | <b>1.58e-02</b> | <b>.026</b> | <b>2.81e-04</b> | <b>1.68e-02</b> | <b>&lt;0.01, 0.03]</b> |
| <b>T_Sup-O_right.nii</b> | <b>2.84</b> | <b>1.90e-02</b> | <b>.006</b> | <b>4.09e-04</b> | <b>2.02e-02</b> | <b>[0.01, 0.03]</b>    |
| T_Sup-OT_left.nii        | 1.20        | 7.91e-03        | .254        | 7.27e-05        | 8.53e-03        | [-0.01, 0.02]          |
| T_Sup-OT_right.nii       | 1.36        | 9.10e-03        | .214        | 9.35e-05        | 9.67e-03        | [-0.01, 0.02]          |
| T_Sup-P_left.nii         | 1.32        | 8.73e-03        | .204        | 8.82e-05        | 9.39e-03        | [-0.01, 0.02]          |
| T_Sup-P_right.nii        | 1.46        | 9.55e-03        | .198        | 1.07e-04        | 1.04e-02        | [-0.01, 0.02]          |
| T_Sup-PO_left.nii        | 1.95        | 1.32e-02        | .070        | 1.92e-04        | 1.39e-02        | [-0.01, 0.03]          |
| T_Sup-PO_right.nii       | 2.05        | 1.38e-02        | .063        | 2.13e-04        | 1.46e-02        | <0.01, 0.03]           |
| T_Sup-PT_left.nii        | 1.06        | 7.19e-03        | .399        | 5.65e-05        | 7.52e-03        | [-0.01, 0.02]          |
| T_Sup-PT_right.nii       | 1.43        | 9.62e-03        | .211        | 1.03e-04        | 1.01e-02        | [-0.01, 0.02]          |
| T_Sup-T_left.nii         | 1.47        | 9.58e-03        | .196        | 1.09e-04        | 1.04e-02        | [-0.01, 0.02]          |
| T_Sup-T_right.nii        | 1.90        | 1.26e-02        | .083        | 1.82e-04        | 1.35e-02        | [-0.01, 0.03]          |
| T_TF_left.nii            | 1.84        | 1.10e-02        | .087        | 1.71e-04        | 1.31e-02        | [-0.01, 0.02]          |
| T_TF_right.nii           | 1.53        | 9.08e-03        | .153        | 1.19e-04        | 1.09e-02        | [-0.01, 0.02]          |
| T_TO_left.nii            | 0.77        | 5.05e-03        | .555        | 3.04e-05        | 5.51e-03        | [-0.01, 0.02]          |
| T_TO_right.nii           | 1.16        | 7.63e-03        | .272        | 6.82e-05        | 8.26e-03        | [-0.01, 0.02]          |
| T_TP_left.nii            | 1.52        | 9.58e-03        | .178        | 1.16e-04        | 1.08e-02        | [-0.01, 0.02]          |
| T_TP_right.nii           | 1.19        | 7.56e-03        | .368        | 7.15e-05        | 8.46e-03        | [-0.01, 0.02]          |
| <b>T_UF_left.nii</b>     | <b>2.16</b> | <b>1.36e-02</b> | <b>.043</b> | <b>2.37e-04</b> | <b>1.54e-02</b> | <b>&lt;0.01, 0.03]</b> |
| T_UF_right.nii           | 2.07        | 1.31e-02        | .053        | 2.17e-04        | 1.47e-02        | <0.01, 0.03]           |

Note

\*  $p < .05$ , \*\*  $p < .01$ , \*\*\*  $p < .001$ , 95% CI(B)

**Table S3**

***ET PRS Association with White Matter Fractional Anisotropy (FA) - O'Donnell Research Group***

***(ORG) Atlas***

| Tract            | <i>t</i> | $\beta$   | <i>p</i> | Eta2     | Cohens_f | 95% CI         |
|------------------|----------|-----------|----------|----------|----------|----------------|
| T_AF_left.nii    | -1.04    | -6.56e-03 | .363     | 5.40e-05 | 7.35e-03 | [-0.02, 0.01]  |
| T_AF_right.nii   | -0.69    | -4.39e-03 | .600     | 2.35e-05 | 4.85e-03 | [-0.02, 0.01]  |
| T_CB_left.nii    | -0.98    | -6.22e-03 | .361     | 4.71e-05 | 6.86e-03 | [-0.02, 0.01]  |
| T_CB_right.nii   | -2.05    | -1.31e-02 | .056     | 2.07e-04 | 1.44e-02 | [-0.03, -0.01] |
| T_CC1.nii        | -0.31    | -2.01e-03 | .881     | 5.01e-06 | 2.24e-03 | [-0.01, 0.01]  |
| T_CC2.nii        | -1.52    | -9.82e-03 | .156     | 1.15e-04 | 1.07e-02 | [-0.02, <0.01] |
| T_CC3.nii        | 0.19     | 1.28e-03  | .932     | 1.85e-06 | 1.36e-03 | [-0.01, 0.01]  |
| T_CC4.nii        | 0.43     | 2.90e-03  | .735     | 9.21e-06 | 3.03e-03 | [-0.01, 0.02]  |
| T_CC5.nii        | -0.06    | -3.88e-04 | 1.00     | 1.66e-07 | 4.07e-04 | [-0.01, 0.01]  |
| T_CC6.nii        | 1.36     | 9.14e-03  | .191     | 9.25e-05 | 9.62e-03 | [-0.01, 0.02]  |
| T_CC7.nii        | 0.47     | 3.19e-03  | .699     | 1.12e-05 | 3.35e-03 | [-0.01, 0.02]  |
| T_CPC.nii        | -1.07    | -6.83e-03 | .451     | 5.68e-05 | 7.53e-03 | [-0.02, 0.01]  |
| T_CR-F_left.nii  | -0.13    | -8.45e-04 | 1.00     | 8.51e-07 | 9.23e-04 | [-0.01, 0.01]  |
| T_CR-F_right.nii | 0.12     | 7.88e-04  | .992     | 7.54e-07 | 8.69e-04 | [-0.01, 0.01]  |
| T_CR-P_left.nii  | 0.44     | 2.93e-03  | .725     | 9.72e-06 | 3.12e-03 | [-0.01, 0.02]  |
| T_CR-P_right.nii | 0.63     | 4.18e-03  | .645     | 1.99e-05 | 4.46e-03 | [-0.01, 0.02]  |
| T_CST_left.nii   | 0.24     | 1.53e-03  | .895     | 2.74e-06 | 1.66e-03 | [-0.01, 0.01]  |
| T_CST_right.nii  | 0.65     | 4.17e-03  | .814     | 2.08e-05 | 4.56e-03 | [-0.01, 0.02]  |
| T_EC_left.nii    | 0.02     | 1.56e-04  | 1.00     | 2.94e-08 | 1.72e-04 | [-0.01, 0.01]  |
| T_EC_right.nii   | 0.83     | 5.27e-03  | .498     | 3.47e-05 | 5.89e-03 | [-0.01, 0.02]  |
| T_EmC_left.nii   | -1.01    | -6.37e-03 | .494     | 5.09e-05 | 7.13e-03 | [-0.02, 0.01]  |
| T_EmC_right.nii  | -1.24    | -7.84e-03 | .296     | 7.70e-05 | 8.77e-03 | [-0.02, <0.01] |
| T_ICP_left.nii   | -1.23    | -7.89e-03 | .241     | 7.55e-05 | 8.69e-03 | [-0.02, <0.01] |
| T_ICP_right.nii  | -0.85    | -5.38e-03 | .437     | 3.58e-05 | 5.98e-03 | [-0.02, 0.01]  |

Table S3

*ET PRS Association with White Matter Fractional Anisotropy (FA) - O'Donnell Research Group**(ORG) Atlas*

| Tract                      | <i>t</i> | $\beta$   | <i>p</i> | Eta2     | Cohens_f | 95% CI         |
|----------------------------|----------|-----------|----------|----------|----------|----------------|
| T_ILF_left.nii             | -0.82    | -5.09e-03 | .566     | 3.36e-05 | 5.80e-03 | [-0.02, 0.01]  |
| T_ILF_right.nii            | -0.40    | -2.44e-03 | .831     | 8.13e-06 | 2.85e-03 | [-0.01, 0.01]  |
| T_Intra-CBLM-I&P_left.nii  | -1.44    | -8.59e-03 | .206     | 1.03e-04 | 1.01e-02 | [-0.02, <0.01] |
| T_Intra-CBLM-I&P_right.nii | -1.51    | -8.98e-03 | .182     | 1.12e-04 | 1.06e-02 | [-0.02, <0.01] |
| T_Intra-CBLM-PaT_left.nii  | -0.94    | -6.41e-03 | .428     | 5.03e-05 | 7.10e-03 | [-0.02, 0.01]  |
| T_Intra-CBLM-PaT_right.nii | -2.04    | -1.58e-02 | .057     | 2.96e-04 | 1.72e-02 | [-0.03, -0.01] |
| T_IOFF_left.nii            | -1.28    | -8.41e-03 | .274     | 8.28e-05 | 9.10e-03 | [-0.02, <0.01] |
| T_IOFF_right.nii           | -1.27    | -8.04e-03 | .282     | 8.07e-05 | 8.98e-03 | [-0.02, <0.01] |
| T_MCP.nii                  | -1.78    | -1.10e-02 | .103     | 1.58e-04 | 1.26e-02 | [-0.02, <0.01] |
| T_MdLF_left.nii            | 0.25     | 1.55e-03  | .886     | 3.01e-06 | 1.73e-03 | [-0.01, 0.01]  |
| T_MdLF_right.nii           | -0.66    | -4.10e-03 | .557     | 2.18e-05 | 4.67e-03 | [-0.02, 0.01]  |
| T_PLIC_left.nii            | -0.37    | -2.47e-03 | .779     | 6.96e-06 | 2.64e-03 | [-0.02, 0.01]  |
| T_PLIC_right.nii           | -0.49    | -3.25e-03 | .690     | 1.18e-05 | 3.43e-03 | [-0.02, 0.01]  |
| T_SF_left.nii              | -0.95    | -5.91e-03 | .419     | 4.42e-05 | 6.65e-03 | [-0.02, 0.01]  |
| T_SF_right.nii             | -0.53    | -3.33e-03 | .652     | 1.41e-05 | 3.75e-03 | [-0.02, 0.01]  |
| T_SLF-I_left.nii           | -1.19    | -7.51e-03 | .322     | 6.98e-05 | 8.35e-03 | [-0.02, <0.01] |
| T_SLF-I_right.nii          | -2.09    | -1.30e-02 | .067     | 2.15e-04 | 1.47e-02 | [-0.03, -0.01] |
| T_SLF-II_left.nii          | -1.32    | -8.34e-03 | .259     | 8.56e-05 | 9.25e-03 | [-0.02, <0.01] |
| T_SLF-II_right.nii         | -1.44    | -9.00e-03 | .187     | 1.03e-04 | 1.02e-02 | [-0.02, <0.01] |
| T_SLF-III_left.nii         | -1.02    | -6.34e-03 | .423     | 5.17e-05 | 7.19e-03 | [-0.02, 0.01]  |
| T_SLF-III_right.nii        | -0.60    | -3.76e-03 | .701     | 1.79e-05 | 4.23e-03 | [-0.02, 0.01]  |
| T_SO_left.nii              | 0.23     | 1.51e-03  | .997     | 2.54e-06 | 1.59e-03 | [-0.01, 0.01]  |
| T_SO_right.nii             | 0.49     | 3.26e-03  | .683     | 1.22e-05 | 3.49e-03 | [-0.01, 0.02]  |
| T_SP_left.nii              | 0.91     | 6.01e-03  | .401     | 4.06e-05 | 6.37e-03 | [-0.01, 0.02]  |
| T_SP_right.nii             | 0.85     | 5.56e-03  | .437     | 3.54e-05 | 5.95e-03 | [-0.01, 0.02]  |



Table S3

*ET PRS Association with White Matter Fractional Anisotropy (FA) - O'Donnell Research Group**(ORG) Atlas*

| Tract                   | <i>t</i>     | $\beta$          | <i>p</i>    | Eta2            | Cohens_f        | 95% CI                |
|-------------------------|--------------|------------------|-------------|-----------------|-----------------|-----------------------|
| <b>T_Sup-F_left.nii</b> | <b>-2.41</b> | <b>-1.45e-02</b> | <b>.020</b> | <b>2.85e-04</b> | <b>1.69e-02</b> | <b>[-0.03, -0.01]</b> |
| T_Sup-F_right.nii       | -1.51        | -9.03e-03        | .161        | 1.12e-04        | 1.06e-02        | [-0.02, <0.01]        |
| T_Sup-FP_left.nii       | -1.44        | -9.24e-03        | .183        | 1.02e-04        | 1.01e-02        | [-0.02, <0.01]        |
| T_Sup-FP_right.nii      | -1.52        | -9.68e-03        | .157        | 1.14e-04        | 1.07e-02        | [-0.02, <0.01]        |
| T_Sup-O_left.nii        | -0.80        | -5.08e-03        | .518        | 3.17e-05        | 5.63e-03        | [-0.02, 0.01]         |
| T_Sup-O_right.nii       | -1.34        | -8.61e-03        | .219        | 8.96e-05        | 9.47e-03        | [-0.02, <0.01]        |
| T_Sup-OT_left.nii       | 0.18         | 1.11e-03         | .940        | 1.68e-06        | 1.29e-03        | [-0.01, 0.01]         |
| T_Sup-OT_right.nii      | -1.08        | -6.53e-03        | .340        | 5.82e-05        | 7.63e-03        | [-0.02, 0.01]         |
| T_Sup-P_left.nii        | -0.35        | -2.21e-03        | .888        | 6.01e-06        | 2.45e-03        | [-0.01, 0.01]         |
| T_Sup-P_right.nii       | -0.76        | -4.73e-03        | .492        | 2.85e-05        | 5.34e-03        | [-0.02, 0.01]         |
| T_Sup-PO_left.nii       | -0.15        | -1.00e-03        | .966        | 1.16e-06        | 1.08e-03        | [-0.01, 0.01]         |
| T_Sup-PO_right.nii      | -0.24        | -1.53e-03        | .993        | 2.77e-06        | 1.66e-03        | [-0.01, 0.01]         |
| T_Sup-PT_left.nii       | -0.64        | -3.99e-03        | .583        | 2.04e-05        | 4.51e-03        | [-0.02, 0.01]         |
| T_Sup-PT_right.nii      | -0.86        | -5.27e-03        | .430        | 3.64e-05        | 6.03e-03        | [-0.02, 0.01]         |
| T_Sup-T_left.nii        | -1.02        | -6.10e-03        | .337        | 5.16e-05        | 7.19e-03        | [-0.02, 0.01]         |
| T_Sup-T_right.nii       | -1.31        | -7.78e-03        | .209        | 8.49e-05        | 9.21e-03        | [-0.02, <0.01]        |
| T_TF_left.nii           | -0.71        | -4.52e-03        | .656        | 2.49e-05        | 4.99e-03        | [-0.02, 0.01]         |
| T_TF_right.nii          | -0.33        | -2.11e-03        | .907        | 5.33e-06        | 2.31e-03        | [-0.01, 0.01]         |
| T_TO_left.nii           | 1.52         | 1.01e-02         | .175        | 1.15e-04        | 1.07e-02        | [-0.01, 0.02]         |
| T_TO_right.nii          | 1.41         | 9.12e-03         | .193        | 9.92e-05        | 9.96e-03        | [-0.01, 0.02]         |
| T_TP_left.nii           | 0.35         | 2.31e-03         | .798        | 6.07e-06        | 2.46e-03        | [-0.01, 0.02]         |
| T_TP_right.nii          | 0.60         | 3.93e-03         | .600        | 1.80e-05        | 4.25e-03        | [-0.01, 0.02]         |
| T_UF_left.nii           | -1.56        | -9.06e-03        | .144        | 1.22e-04        | 1.10e-02        | [-0.02, <0.01]        |
| T_UF_right.nii          | -0.93        | -5.37e-03        | .433        | 4.27e-05        | 6.53e-03        | [-0.02, 0.01]         |

*Note*\*  $p < .05$ , \*\*  $p < .01$ , \*\*\*  $p < .001$ , 95% CI(B)

**Table S4**

***ET PRS Association with White Matter Radial Diffusivity (RD) - O'Donnell Research Group (ORG)***

***Atlas***

| Tract                 | <i>t</i>    | $\beta$         | <i>p</i>    | Eta2            | Cohens_f        | 95% CI                 |
|-----------------------|-------------|-----------------|-------------|-----------------|-----------------|------------------------|
| T_AF_left.nii         | 1.73        | 2.50e-03        | .115        | 1.48e-04        | 1.22e-02        | [-0.01, 0.01]          |
| T_AF_right.nii        | 1.45        | 2.08e-03        | .179        | 1.05e-04        | 1.02e-02        | [-0.01, <0.01]         |
| T_CB_left.nii         | 1.58        | 2.51e-03        | .181        | 1.22e-04        | 1.10e-02        | [-0.01, 0.01]          |
| <b>T_CB_right.nii</b> | <b>2.59</b> | <b>4.05e-03</b> | <b>.015</b> | <b>3.30e-04</b> | <b>1.82e-02</b> | <b>&lt;0.01, 0.01]</b> |
| <b>T_CC1.nii</b>      | <b>2.52</b> | <b>4.69e-03</b> | <b>.016</b> | <b>3.20e-04</b> | <b>1.79e-02</b> | <b>&lt;0.01, 0.01]</b> |
| T_CC2.nii             | 1.95        | 3.25e-03        | .062        | 1.90e-04        | 1.38e-02        | [-0.01, 0.01]          |
| T_CC3.nii             | 1.93        | 3.21e-03        | .074        | 1.86e-04        | 1.36e-02        | [-0.01, 0.01]          |
| T_CC4.nii             | 1.29        | 8.37e-03        | .243        | 8.28e-05        | 9.10e-03        | [-0.01, 0.02]          |
| T_CC5.nii             | 1.61        | 1.08e-02        | .168        | 1.31e-04        | 1.14e-02        | [-0.01, 0.02]          |
| T_CC6.nii             | 0.50        | 7.43e-04        | .795        | 1.25e-05        | 3.54e-03        | [-0.01, <0.01]         |
| T_CC7.nii             | 0.97        | 1.47e-03        | .459        | 4.67e-05        | 6.84e-03        | [-0.01, <0.01]         |
| T_CPC.nii             | 1.35        | 1.71e-03        | .324        | 9.12e-05        | 9.55e-03        | [-0.01, <0.01]         |
| T_CR-F_left.nii       | 1.48        | 2.21e-03        | .190        | 1.09e-04        | 1.05e-02        | [-0.01, 0.01]          |
| T_CR-F_right.nii      | 1.45        | 2.16e-03        | .180        | 1.04e-04        | 1.02e-02        | [-0.01, 0.01]          |
| T_CR-P_left.nii       | 1.13        | 7.53e-03        | .316        | 6.37e-05        | 7.98e-03        | [-0.01, 0.02]          |
| T_CR-P_right.nii      | 0.45        | 7.00e-04        | .714        | 1.03e-05        | 3.21e-03        | [-0.01, <0.01]         |
| T_CST_left.nii        | 1.58        | 2.34e-03        | .158        | 1.23e-04        | 1.11e-02        | [-0.01, 0.01]          |
| T_CST_right.nii       | 1.12        | 1.66e-03        | .363        | 6.19e-05        | 7.87e-03        | [-0.01, <0.01]         |
| <b>T_EC_left.nii</b>  | <b>2.12</b> | <b>1.39e-02</b> | <b>.047</b> | <b>2.27e-04</b> | <b>1.51e-02</b> | <b>&lt;0.01, 0.03]</b> |
| T_EC_right.nii        | 1.59        | 2.58e-03        | .175        | 1.28e-04        | 1.13e-02        | [-0.01, 0.01]          |
| T_EmC_left.nii        | 1.60        | 1.02e-02        | .150        | 1.29e-04        | 1.13e-02        | [-0.01, 0.02]          |
| T_EmC_right.nii       | 1.53        | 2.37e-03        | .230        | 1.18e-04        | 1.09e-02        | [-0.01, 0.01]          |
| T_ICP_left.nii        | -0.81       | -1.86e-03       | .509        | 3.29e-05        | 5.74e-03        | [-0.01, <0.01]         |
| T_ICP_right.nii       | 0.10        | 2.36e-04        | 1.00        | 5.32e-07        | 7.29e-04        | [-0.01, <0.01]         |

Table S4

*ET PRS Association with White Matter Radial Diffusivity (RD) - O'Donnell Research Group (ORG)**Atlas*

| Tract                                | <i>t</i>    | $\beta$         | <i>p</i>    | Eta2            | Cohens_f        | 95% CI                |
|--------------------------------------|-------------|-----------------|-------------|-----------------|-----------------|-----------------------|
| T_ILF_left.nii                       | 1.28        | 1.92e-03        | .316        | 8.17e-05        | 9.04e-03        | [-0.01, <0.01]        |
| T_ILF_right.nii                      | 1.91        | 2.91e-03        | .078        | 1.81e-04        | 1.35e-02        | [-0.01, 0.01]         |
| <b>T_Intra-CBLM-I&amp;P_left.nii</b> | <b>2.15</b> | <b>4.47e-03</b> | <b>.038</b> | <b>2.29e-04</b> | <b>1.51e-02</b> | <b>&lt;0.01, 0.01</b> |
| T_Intra-CBLM-I&P_right.nii           | 1.96        | 4.28e-03        | .061        | 1.90e-04        | 1.38e-02        | <0.01, 0.01]          |
| T_Intra-CBLM-PaT_left.nii            | 1.63        | 1.10e-02        | .127        | 1.52e-04        | 1.23e-02        | [-0.01, 0.02]         |
| T_Intra-CBLM-PaT_right.nii           | 1.52        | 6.62e-03        | .202        | 1.65e-04        | 1.28e-02        | [-0.01, 0.02]         |
| <b>T_IOFF_left.nii</b>               | <b>2.10</b> | <b>1.35e-02</b> | <b>.050</b> | <b>2.20e-04</b> | <b>1.49e-02</b> | <b>&lt;0.01, 0.03</b> |
| <b>T_IOFF_right.nii</b>              | <b>2.22</b> | <b>3.36e-03</b> | <b>.049</b> | <b>2.47e-04</b> | <b>1.57e-02</b> | <b>&lt;0.01, 0.01</b> |
| <b>T_MCP.nii</b>                     | <b>2.58</b> | <b>4.79e-03</b> | <b>.014</b> | <b>3.31e-04</b> | <b>1.82e-02</b> | <b>&lt;0.01, 0.01</b> |
| T_MdLF_left.nii                      | 0.76        | 1.11e-03        | .546        | 2.87e-05        | 5.36e-03        | [-0.01, <0.01]        |
| T_MdLF_right.nii                     | 1.49        | 2.15e-03        | .187        | 1.10e-04        | 1.05e-02        | [-0.01, <0.01]        |
| T_PLIC_left.nii                      | 1.03        | 6.60e-03        | .417        | 5.28e-05        | 7.26e-03        | [-0.01, 0.02]         |
| T_PLIC_right.nii                     | 1.08        | 6.94e-03        | .307        | 5.83e-05        | 7.63e-03        | [-0.01, 0.02]         |
| T_SF_left.nii                        | 1.97        | 2.83e-03        | .078        | 1.90e-04        | 1.38e-02        | <0.01, 0.01]          |
| T_SF_right.nii                       | 1.86        | 2.61e-03        | .086        | 1.71e-04        | 1.31e-02        | [-0.01, 0.01]         |
| T_SLF-I_left.nii                     | 1.71        | 2.60e-03        | .120        | 1.44e-04        | 1.20e-02        | [-0.01, 0.01]         |
| T_SLF-I_right.nii                    | 2.04        | 3.16e-03        | .065        | 2.05e-04        | 1.43e-02        | <0.01, 0.01]          |
| T_SLF-II_left.nii                    | 1.52        | 2.19e-03        | .235        | 1.15e-04        | 1.07e-02        | [-0.01, 0.01]         |
| T_SLF-II_right.nii                   | 1.66        | 2.45e-03        | .134        | 1.36e-04        | 1.17e-02        | [-0.01, 0.01]         |
| T_SLF-III_left.nii                   | 1.76        | 2.73e-03        | .096        | 1.54e-04        | 1.24e-02        | [-0.01, 0.01]         |
| T_SLF-III_right.nii                  | 1.36        | 2.18e-03        | .211        | 9.25e-05        | 9.62e-03        | [-0.01, 0.01]         |
| T_SO_left.nii                        | 1.13        | 7.32e-03        | .356        | 6.38e-05        | 7.99e-03        | [-0.01, 0.02]         |
| T_SO_right.nii                       | 1.21        | 7.81e-03        | .314        | 7.26e-05        | 8.52e-03        | [-0.01, 0.02]         |
| T_SP_left.nii                        | 1.18        | 1.62e-03        | .289        | 6.93e-05        | 8.32e-03        | [-0.01, <0.01]        |
| T_SP_right.nii                       | 1.52        | 2.15e-03        | .158        | 1.13e-04        | 1.07e-02        | [-0.01, <0.01]        |

Table S4

*ET PRS Association with White Matter Radial Diffusivity (RD) - O'Donnell Research Group (ORG)**Atlas*

| Tract                    | <i>t</i>    | $\beta$         | <i>p</i>    | Eta2            | Cohens_f        | 95% CI                |
|--------------------------|-------------|-----------------|-------------|-----------------|-----------------|-----------------------|
| <b>T_Sup-F_left.nii</b>  | <b>2.84</b> | <b>4.95e-03</b> | <b>.007</b> | <b>3.96e-04</b> | <b>1.99e-02</b> | <b>&lt;0.01, 0.01</b> |
| <b>T_Sup-F_right.nii</b> | <b>2.34</b> | <b>3.98e-03</b> | <b>.027</b> | <b>2.69e-04</b> | <b>1.64e-02</b> | <b>&lt;0.01, 0.01</b> |
| T_Sup-FP_left.nii        | 1.62        | 2.61e-03        | .165        | 1.29e-04        | 1.14e-02        | [-0.01, 0.01]         |
| T_Sup-FP_right.nii       | 1.85        | 2.92e-03        | .088        | 1.69e-04        | 1.30e-02        | [-0.01, 0.01]         |
| <b>T_Sup-O_left.nii</b>  | <b>2.17</b> | <b>3.78e-03</b> | <b>.047</b> | <b>2.33e-04</b> | <b>1.53e-02</b> | <b>&lt;0.01, 0.01</b> |
| <b>T_Sup-O_right.nii</b> | <b>2.14</b> | <b>3.90e-03</b> | <b>.045</b> | <b>2.27e-04</b> | <b>1.51e-02</b> | <b>&lt;0.01, 0.01</b> |
| T_Sup-OT_left.nii        | 1.46        | 2.26e-03        | .226        | 1.06e-04        | 1.03e-02        | [-0.01, 0.01]         |
| T_Sup-OT_right.nii       | 1.56        | 2.63e-03        | .187        | 1.21e-04        | 1.10e-02        | [-0.01, 0.01]         |
| T_Sup-P_left.nii         | 1.15        | 1.86e-03        | .307        | 6.49e-05        | 8.06e-03        | [-0.01, 0.01]         |
| T_Sup-P_right.nii        | 1.30        | 2.18e-03        | .237        | 8.30e-05        | 9.11e-03        | [-0.01, 0.01]         |
| T_Sup-PO_left.nii        | 1.60        | 2.64e-03        | .173        | 1.26e-04        | 1.12e-02        | [-0.01, 0.01]         |
| T_Sup-PO_right.nii       | 1.82        | 2.96e-03        | .125        | 1.64e-04        | 1.28e-02        | [-0.01, 0.01]         |
| T_Sup-PT_left.nii        | 0.95        | 1.47e-03        | .418        | 4.45e-05        | 6.67e-03        | [-0.01, <0.01]        |
| T_Sup-PT_right.nii       | 1.24        | 1.96e-03        | .261        | 7.63e-05        | 8.74e-03        | [-0.01, 0.01]         |
| T_Sup-T_left.nii         | 1.53        | 2.42e-03        | .153        | 1.16e-04        | 1.08e-02        | [-0.01, 0.01]         |
| T_Sup-T_right.nii        | 1.86        | 3.00e-03        | .087        | 1.71e-04        | 1.31e-02        | [-0.01, 0.01]         |
| T_TF_left.nii            | 1.90        | 2.71e-03        | .091        | 1.77e-04        | 1.33e-02        | [-0.01, 0.01]         |
| T_TF_right.nii           | 1.73        | 2.42e-03        | .115        | 1.47e-04        | 1.21e-02        | [-0.01, 0.01]         |
| T_TO_left.nii            | 0.25        | 3.87e-04        | .914        | 3.21e-06        | 1.79e-03        | [-0.01, <0.01]        |
| T_TO_right.nii           | 0.83        | 5.41e-03        | .638        | 3.43e-05        | 5.86e-03        | [-0.01, 0.02]         |
| T_TP_left.nii            | 1.07        | 1.45e-03        | .347        | 5.66e-05        | 7.53e-03        | [-0.01, <0.01]        |
| T_TP_right.nii           | 1.10        | 1.54e-03        | .373        | 5.96e-05        | 7.72e-03        | [-0.01, <0.01]        |
| <b>T_UF_left.nii</b>     | <b>2.28</b> | <b>3.82e-03</b> | <b>.028</b> | <b>2.59e-04</b> | <b>1.61e-02</b> | <b>&lt;0.01, 0.01</b> |
| <b>T_UF_right.nii</b>    | <b>2.20</b> | <b>3.57e-03</b> | <b>.038</b> | <b>2.40e-04</b> | <b>1.55e-02</b> | <b>&lt;0.01, 0.01</b> |

*Note*\*  $p < .05$ , \*\*  $p < .01$ , \*\*\*  $p < .001$ , 95% CI(B)

Table S5

*ET PRS Association with White Matter Axial Diffusivity (AD) - O'Donnell Research Group (ORG)**Atlas*

| Tract                  | <i>t</i>    | $\beta$         | <i>p</i>    | Eta2            | Cohens_f        | 95% CI                    |
|------------------------|-------------|-----------------|-------------|-----------------|-----------------|---------------------------|
| T_AF_left.nii          | 1.66        | 2.35e-05        | .178        | 1.37e-04        | 1.17e-02        | [-0.01, <0.01]            |
| T_AF_right.nii         | 1.42        | 2.17e-05        | .243        | 1.01e-04        | 1.00e-02        | [-0.01, <0.01]            |
| T_CB_left.nii          | 1.03        | 1.86e-05        | .473        | 5.26e-05        | 7.25e-03        | [-0.01, <0.01]            |
| T_CB_right.nii         | 0.92        | 1.71e-05        | .457        | 4.17e-05        | 6.46e-03        | [-0.01, <0.01]            |
| <b>T_CC1.nii</b>       | <b>2.26</b> | <b>4.56e-05</b> | <b>.033</b> | <b>2.59e-04</b> | <b>1.61e-02</b> | <b>&lt;0.01, &lt;0.01</b> |
| T_CC2.nii              | 0.95        | 1.68e-05        | .377        | 4.48e-05        | 6.69e-03        | [-0.01, <0.01]            |
| <b>T_CC3.nii</b>       | <b>2.61</b> | <b>4.77e-05</b> | <b>.012</b> | <b>3.42e-04</b> | <b>1.85e-02</b> | <b>&lt;0.01, &lt;0.01</b> |
| <b>T_CC4.nii</b>       | <b>2.42</b> | <b>2.97e-04</b> | <b>.024</b> | <b>2.94e-04</b> | <b>1.71e-02</b> | <b>&lt;0.01, &lt;0.01</b> |
| T_CC5.nii              | 1.61        | 1.04e-02        | .149        | 1.29e-04        | 1.14e-02        | [-0.01, 0.02]             |
| <b>T_CC6.nii</b>       | <b>2.24</b> | <b>4.03e-05</b> | <b>.046</b> | <b>2.51e-04</b> | <b>1.58e-02</b> | <b>&lt;0.01, &lt;0.01</b> |
| T_CC7.nii              | 1.92        | 3.86e-05        | .086        | 1.84e-04        | 1.36e-02        | [-0.01, <0.01]            |
| T_CPC.nii              | 1.10        | 1.70e-05        | .336        | 6.10e-05        | 7.81e-03        | [-0.01, <0.01]            |
| <b>T_CR-F_left.nii</b> | <b>2.23</b> | <b>3.51e-05</b> | <b>.047</b> | <b>2.48e-04</b> | <b>1.57e-02</b> | <b>&lt;0.01, &lt;0.01</b> |
| T_CR-F_right.nii       | 2.10        | 3.29e-05        | .078        | 2.19e-04        | 1.48e-02        | [-0.01, <0.01]            |
| T_CR-P_left.nii        | 2.04        | 2.28e-04        | .092        | 2.07e-04        | 1.44e-02        | [-0.01, <0.01]            |
| T_CR-P_right.nii       | 1.92        | 3.30e-05        | .100        | 1.84e-04        | 1.36e-02        | [-0.01, <0.01]            |
| T_CST_left.nii         | 2.27        | 3.65e-05        | .052        | 2.55e-04        | 1.60e-02        | [-0.01, <0.01]            |
| T_CST_right.nii        | 1.96        | 3.15e-05        | .110        | 1.91e-04        | 1.38e-02        | [-0.01, <0.01]            |
| <b>T_EC_left.nii</b>   | <b>2.22</b> | <b>1.55e-02</b> | <b>.042</b> | <b>2.50e-04</b> | <b>1.58e-02</b> | <b>&lt;0.01, 0.03</b>     |
| T_EC_right.nii         | 2.05        | 4.20e-05        | .055        | 2.14e-04        | 1.46e-02        | [-0.01, <0.01]            |
| T_EmC_left.nii         | 1.16        | 7.89e-03        | .303        | 6.70e-05        | 8.19e-03        | [-0.01, 0.02]             |
| T_EmC_right.nii        | 0.88        | 1.56e-05        | .463        | 3.88e-05        | 6.23e-03        | [-0.01, <0.01]            |
| T_ICP_left.nii         | -1.44       | -4.27e-05       | .237        | 1.03e-04        | 1.01e-02        | [-0.01, <0.01]            |
| T_ICP_right.nii        | -0.42       | -1.20e-05       | .828        | 8.65e-06        | 2.94e-03        | [-0.01, <0.01]            |

Table S5

*ET PRS Association with White Matter Axial Diffusivity (AD) - O'Donnell Research Group (ORG)**Atlas*

| Tract                      | <i>t</i>    | $\beta$         | <i>p</i>    | Eta2            | Cohens_f        | 95% CI                     |
|----------------------------|-------------|-----------------|-------------|-----------------|-----------------|----------------------------|
| T_ILF_left.nii             | 0.97        | 1.46e-05        | .416        | 4.68e-05        | 6.84e-03        | [-0.01, <0.01]             |
| <b>T_ILF_right.nii</b>     | <b>2.26</b> | <b>3.48e-05</b> | <b>.037</b> | <b>2.56e-04</b> | <b>1.60e-02</b> | <b>&lt;0.01, &lt;0.01]</b> |
| T_Intra-CBLM-I&P_left.nii  | 1.69        | 2.85e-05        | .101        | 1.41e-04        | 1.19e-02        | [-0.01, <0.01]             |
| T_Intra-CBLM-I&P_right.nii | 1.64        | 2.80e-05        | .138        | 1.33e-04        | 1.16e-02        | [-0.01, <0.01]             |
| T_Intra-CBLM-PaT_left.nii  | 1.31        | 9.55e-03        | .261        | 9.91e-05        | 9.96e-03        | [-0.01, 0.02]              |
| T_Intra-CBLM-PaT_right.nii | 0.68        | 3.51e-05        | .606        | 3.30e-05        | 5.74e-03        | [-0.01, <0.01]             |
| T_IOFF_left.nii            | 0.95        | 6.52e-03        | .418        | 4.54e-05        | 6.74e-03        | [-0.01, 0.02]              |
| T_IOFF_right.nii           | 1.01        | 1.78e-05        | .385        | 5.07e-05        | 7.12e-03        | [-0.01, <0.01]             |
| T_MCP.nii                  | 1.62        | 2.78e-05        | .145        | 1.31e-04        | 1.14e-02        | [-0.01, <0.01]             |
| T_MdLF_left.nii            | 1.68        | 2.41e-05        | .114        | 1.39e-04        | 1.18e-02        | [-0.01, <0.01]             |
| T_MdLF_right.nii           | 1.47        | 2.17e-05        | .155        | 1.07e-04        | 1.04e-02        | [-0.01, <0.01]             |
| T_PLIC_left.nii            | 1.40        | 1.48e-04        | .253        | 9.75e-05        | 9.88e-03        | [-0.01, <0.01]             |
| T_PLIC_right.nii           | 1.66        | 1.11e-02        | .134        | 1.37e-04        | 1.17e-02        | [-0.01, 0.02]              |
| T_SF_left.nii              | 2.13        | 2.97e-05        | .060        | 2.24e-04        | 1.50e-02        | <0.01, <0.01]              |
| <b>T_SF_right.nii</b>      | <b>2.19</b> | <b>3.05e-05</b> | <b>.045</b> | <b>2.36e-04</b> | <b>1.54e-02</b> | <b>&lt;0.01, &lt;0.01]</b> |
| T_SLF-I_left.nii           | 1.11        | 1.66e-05        | .367        | 6.06e-05        | 7.79e-03        | [-0.01, <0.01]             |
| T_SLF-I_right.nii          | 0.79        | 1.20e-05        | .528        | 3.04e-05        | 5.51e-03        | [-0.01, <0.01]             |
| T_SLF-II_left.nii          | 1.32        | 1.85e-05        | .345        | 8.56e-05        | 9.25e-03        | [-0.01, <0.01]             |
| T_SLF-II_right.nii         | 1.10        | 1.60e-05        | .332        | 5.97e-05        | 7.72e-03        | [-0.01, <0.01]             |
| T_SLF-III_left.nii         | 1.70        | 2.46e-05        | .140        | 1.44e-04        | 1.20e-02        | [-0.01, <0.01]             |
| T_SLF-III_right.nii        | 1.87        | 2.81e-05        | .112        | 1.74e-04        | 1.32e-02        | [-0.01, <0.01]             |
| T_SO_left.nii              | 1.73        | 1.14e-02        | .131        | 1.50e-04        | 1.22e-02        | [-0.01, 0.02]              |
| T_SO_right.nii             | 2.14        | 1.41e-02        | .050        | 2.30e-04        | 1.52e-02        | <0.01, 0.03]               |
| <b>T_SP_left.nii</b>       | <b>2.62</b> | <b>3.86e-05</b> | <b>.016</b> | <b>3.39e-04</b> | <b>1.84e-02</b> | <b>&lt;0.01, &lt;0.01]</b> |
| <b>T_SP_right.nii</b>      | <b>2.86</b> | <b>4.48e-05</b> | <b>.008</b> | <b>4.03e-04</b> | <b>2.01e-02</b> | <b>&lt;0.01, &lt;0.01]</b> |

Table S5

*ET PRS Association with White Matter Axial Diffusivity (AD) - O'Donnell Research Group (ORG)**Atlas*

| Tract                     | <i>t</i>    | $\beta$         | <i>p</i>    | Eta2            | Cohens_f        | 95% CI                      |
|---------------------------|-------------|-----------------|-------------|-----------------|-----------------|-----------------------------|
| T_Sup-F_left.nii          | 1.97        | 2.84e-05        | .077        | 1.91e-04        | 1.38e-02        | [<0.01, <0.01]              |
| <b>T_Sup-F_right.nii</b>  | <b>2.26</b> | <b>3.21e-05</b> | <b>.037</b> | <b>2.52e-04</b> | <b>1.59e-02</b> | <b>[&lt;0.01, &lt;0.01]</b> |
| T_Sup-FP_left.nii         | 1.06        | 1.55e-05        | .398        | 5.52e-05        | 7.43e-03        | [-0.01, <0.01]              |
| T_Sup-FP_right.nii        | 1.18        | 1.75e-05        | .317        | 6.87e-05        | 8.29e-03        | [-0.01, <0.01]              |
| T_Sup-O_left.nii          | 2.06        | 3.50e-05        | .062        | 2.10e-04        | 1.45e-02        | [<0.01, <0.01]              |
| T_Sup-O_right.nii         | 1.73        | 3.01e-05        | .116        | 1.48e-04        | 1.21e-02        | [-0.01, <0.01]              |
| T_Sup-OT_left.nii         | 2.01        | 3.09e-05        | .061        | 2.00e-04        | 1.41e-02        | [<0.01, <0.01]              |
| T_Sup-OT_right.nii        | 1.41        | 2.28e-05        | .216        | 9.91e-05        | 9.96e-03        | [-0.01, <0.01]              |
| T_Sup-P_left.nii          | 1.74        | 2.54e-05        | .128        | 1.50e-04        | 1.22e-02        | [-0.01, <0.01]              |
| T_Sup-P_right.nii         | 1.18        | 1.80e-05        | .292        | 6.81e-05        | 8.25e-03        | [-0.01, <0.01]              |
| <b>T_Sup-PO_left.nii</b>  | <b>2.28</b> | <b>3.52e-05</b> | <b>.036</b> | <b>2.56e-04</b> | <b>1.60e-02</b> | <b>[&lt;0.01, &lt;0.01]</b> |
| <b>T_Sup-PO_right.nii</b> | <b>2.59</b> | <b>3.86e-05</b> | <b>.015</b> | <b>3.30e-04</b> | <b>1.82e-02</b> | <b>[&lt;0.01, &lt;0.01]</b> |
| T_Sup-PT_left.nii         | 0.96        | 1.44e-05        | .407        | 4.52e-05        | 6.73e-03        | [-0.01, <0.01]              |
| T_Sup-PT_right.nii        | 1.22        | 1.84e-05        | .308        | 7.30e-05        | 8.54e-03        | [-0.01, <0.01]              |
| T_Sup-T_left.nii          | 1.34        | 1.99e-05        | .221        | 8.84e-05        | 9.40e-03        | [-0.01, <0.01]              |
| T_Sup-T_right.nii         | 1.64        | 2.52e-05        | .140        | 1.33e-04        | 1.15e-02        | [-0.01, <0.01]              |
| T_TF_left.nii             | 1.95        | 2.90e-05        | .080        | 1.87e-04        | 1.37e-02        | [-0.01, <0.01]              |
| <b>T_TF_right.nii</b>     | <b>2.23</b> | <b>3.35e-05</b> | <b>.048</b> | <b>2.44e-04</b> | <b>1.56e-02</b> | <b>[&lt;0.01, &lt;0.01]</b> |
| T_TO_left.nii             | 1.93        | 3.46e-05        | .098        | 1.85e-04        | 1.36e-02        | [-0.01, <0.01]              |
| <b>T_TO_right.nii</b>     | <b>2.64</b> | <b>3.09e-04</b> | <b>.013</b> | <b>3.46e-04</b> | <b>1.86e-02</b> | <b>[&lt;0.01, &lt;0.01]</b> |
| <b>T_TP_left.nii</b>      | <b>2.28</b> | <b>3.43e-05</b> | <b>.041</b> | <b>2.57e-04</b> | <b>1.60e-02</b> | <b>[&lt;0.01, &lt;0.01]</b> |
| T_TP_right.nii            | 2.01        | 3.19e-05        | .082        | 1.98e-04        | 1.41e-02        | [<0.01, <0.01]              |
| T_UF_left.nii             | 1.33        | 2.10e-05        | .288        | 8.84e-05        | 9.40e-03        | [-0.01, <0.01]              |
| T_UF_right.nii            | 1.81        | 2.84e-05        | .110        | 1.64e-04        | 1.28e-02        | [-0.01, <0.01]              |

*Note*\*  $p < .05$ , \*\*  $p < .01$ , \*\*\*  $p < .001$ , 95% CI(B)

**Table S6**

*ET PRS Associations with grey matter fractional anisotropy (FA) - LeadDBS\_Atlas\_compendium (Zhang's 2017 substantia nigra segmentation & Buckner's 2011 functional Cerebellum)*

| Tract                                        | <i>t</i> | $\beta$   | <i>p</i> | Eta2     | Cohens_f | 95% CI         |
|----------------------------------------------|----------|-----------|----------|----------|----------|----------------|
| Cerebellar_Functional_Networks_17Networks_1  | -0.40    | -2.53e-03 | .838     | 7.67e-06 | 2.77e-03 | [-0.01, 0.01]  |
| Cerebellar_Functional_Networks_17Networks_10 | -1.47    | -8.98e-03 | .220     | 1.02e-04 | 1.01e-02 | [-0.02, <0.01] |
| Cerebellar_Functional_Networks_17Networks_11 | 0.33     | 2.11e-03  | .886     | 5.14e-06 | 2.27e-03 | [-0.01, 0.01]  |
| Cerebellar_Functional_Networks_17Networks_12 | -0.40    | -2.50e-03 | .758     | 7.52e-06 | 2.74e-03 | [-0.01, 0.01]  |
| Cerebellar_Functional_Networks_17Networks_13 | -1.13    | -6.86e-03 | .358     | 5.94e-05 | 7.70e-03 | [-0.02, 0.01]  |
| Cerebellar_Functional_Networks_17Networks_14 | -0.72    | -4.65e-03 | .649     | 2.43e-05 | 4.93e-03 | [-0.02, 0.01]  |
| Cerebellar_Functional_Networks_17Networks_15 | 0.32     | 1.96e-03  | .842     | 4.67e-06 | 2.16e-03 | [-0.01, 0.01]  |
| Cerebellar_Functional_Networks_17Networks_16 | -0.75    | -4.56e-03 | .501     | 2.62e-05 | 5.11e-03 | [-0.02, 0.01]  |
| Cerebellar_Functional_Networks_17Networks_17 | -0.77    | -4.65e-03 | .537     | 2.81e-05 | 5.30e-03 | [-0.02, 0.01]  |
| Cerebellar_Functional_Networks_17Networks_2  | 0.14     | 8.85e-04  | 1.00     | 9.49e-07 | 9.74e-04 | [-0.01, 0.01]  |
| Cerebellar_Functional_Networks_17Networks_3  | -0.26    | -1.67e-03 | .873     | 3.21e-06 | 1.79e-03 | [-0.01, 0.01]  |
| Cerebellar_Functional_Networks_17Networks_4  | -0.44    | -2.76e-03 | .729     | 8.90e-06 | 2.98e-03 | [-0.02, 0.01]  |
| Cerebellar_Functional_Networks_17Networks_5  | -0.49    | -3.09e-03 | .767     | 1.10e-05 | 3.32e-03 | [-0.02, 0.01]  |
| Cerebellar_Functional_Networks_17Networks_6  | -0.42    | -2.68e-03 | .741     | 8.31e-06 | 2.88e-03 | [-0.02, 0.01]  |
| Cerebellar_Functional_Networks_17Networks_7  | -0.45    | -2.79e-03 | .803     | 9.49e-06 | 3.08e-03 | [-0.01, 0.01]  |
| Cerebellar_Functional_Networks_17Networks_8  | -0.86    | -5.18e-03 | .538     | 3.45e-05 | 5.87e-03 | [-0.02, 0.01]  |
| Cerebellar_Functional_Networks_17Networks_9  | 0.99     | 6.59e-03  | .396     | 4.56e-05 | 6.75e-03 | [-0.01, 0.02]  |
| Cerebellar_Functional_Networks_7Networks_1   | 0.36     | 2.21e-03  | .873     | 6.06e-06 | 2.46e-03 | [-0.01, 0.01]  |
| Cerebellar_Functional_Networks_7Networks_2   | -0.30    | -1.91e-03 | .837     | 4.33e-06 | 2.08e-03 | [-0.01, 0.01]  |
| Cerebellar_Functional_Networks_7Networks_3   | -0.35    | -2.23e-03 | .796     | 5.86e-06 | 2.42e-03 | [-0.01, 0.01]  |
| Cerebellar_Functional_Networks_7Networks_4   | -0.48    | -2.93e-03 | .775     | 1.06e-05 | 3.26e-03 | [-0.02, 0.01]  |
| Cerebellar_Functional_Networks_7Networks_5   | 0.91     | 6.07e-03  | .498     | 3.89e-05 | 6.24e-03 | [-0.01, 0.02]  |
| Cerebellar_Functional_Networks_7Networks_6   | -0.80    | -4.90e-03 | .555     | 3.00e-05 | 5.48e-03 | [-0.02, 0.01]  |



Table S6

*ET PRS Associations with grey matter fractional anisotropy (FA) - LeadDBS\_Atlas\_compendium (Zhang's 2017 substantia nigra segmentation & Buckner's 2011 functional Cerebellum)*

| Tract                                          | <i>t</i>    | $\beta$         | <i>p</i>    | Eta2            | Cohens_f        | 95% CI                 |
|------------------------------------------------|-------------|-----------------|-------------|-----------------|-----------------|------------------------|
| Cerebellar_Functional_Networks_7Networks_7     | -0.90       | -5.40e-03       | .406        | 3.78e-05        | 6.15e-03        | [-0.02, 0.01]          |
| DBS_targets_ET_VIM_L                           | 0.79        | 5.34e-03        | .525        | 2.96e-05        | 5.44e-03        | [-0.01, 0.02]          |
| DBS_targets_ET_VIM_R                           | 0.54        | 3.60e-03        | .694        | 1.36e-05        | 3.68e-03        | [-0.01, 0.02]          |
| Essential_Tremor_Hypointensity_Coldspot_L      | 0.81        | 5.51e-03        | .596        | 3.10e-05        | 5.57e-03        | [-0.01, 0.02]          |
| Essential_Tremor_Hypointensity_Coldspot_R      | 0.60        | 4.04e-03        | .752        | 1.70e-05        | 4.13e-03        | [-0.01, 0.02]          |
| Essential_Tremor_Hypointensity_gm_mask         | 0.67        | 4.46e-03        | .678        | 2.08e-05        | 4.56e-03        | [-0.01, 0.02]          |
| Essential_Tremor_Hypointensity_GPe_L           | -0.08       | -5.29e-04       | 1.00        | 2.94e-07        | 5.42e-04        | [-0.01, 0.01]          |
| Essential_Tremor_Hypointensity_GPe_R           | 0.78        | 5.26e-03        | .597        | 2.87e-05        | 5.35e-03        | [-0.01, 0.02]          |
| Essential_Tremor_Hypointensity_GPi_L           | -0.15       | -1.03e-03       | .966        | 1.11e-06        | 1.05e-03        | [-0.01, 0.01]          |
| Essential_Tremor_Hypointensity_GPi_R           | -0.52       | -3.48e-03       | .666        | 1.25e-05        | 3.54e-03        | [-0.02, 0.01]          |
| Essential_Tremor_Hypointensity_Hotspot_L       | 1.18        | 7.96e-03        | .340        | 6.52e-05        | 8.08e-03        | [-0.01, 0.02]          |
| Essential_Tremor_Hypointensity_Hotspot_R       | 0.91        | 6.09e-03        | .500        | 3.87e-05        | 6.22e-03        | [-0.01, 0.02]          |
| Essential_Tremor_Hypointensity_Hypointensity_L | 1.23        | 8.24e-03        | .402        | 7.08e-05        | 8.41e-03        | [-0.01, 0.02]          |
| Essential_Tremor_Hypointensity_Hypointensity_R | 1.17        | 7.83e-03        | .414        | 6.41e-05        | 8.01e-03        | [-0.01, 0.02]          |
| <b>Essential_Tremor_Hypointensity_RN_L</b>     | <b>2.38</b> | <b>1.60e-02</b> | <b>.038</b> | <b>2.66e-04</b> | <b>1.63e-02</b> | <b>&lt;0.01, 0.03]</b> |
| <b>Essential_Tremor_Hypointensity_RN_R</b>     | <b>2.98</b> | <b>1.99e-02</b> | <b>.006</b> | <b>4.15e-04</b> | <b>2.04e-02</b> | <b>[0.01, 0.03]</b>    |
| Essential_Tremor_Hypointensity_STN_L           | 0.44        | 2.96e-03        | 1.00        | 8.94e-06        | 2.99e-03        | [-0.01, 0.02]          |
| Essential_Tremor_Hypointensity_STN_R           | -0.19       | -1.25e-03       | 1.00        | 1.63e-06        | 1.28e-03        | [-0.01, 0.01]          |
| Essential_Tremor_Hypointensity_VIM_L           | 0.36        | 2.44e-03        | .788        | 6.21e-06        | 2.49e-03        | [-0.01, 0.02]          |
| Essential_Tremor_Hypointensity_VIM_R           | 0.60        | 4.05e-03        | .600        | 1.71e-05        | 4.14e-03        | [-0.01, 0.02]          |
| Essential_Tremor_Probabilistic_Mapping_pGPe_L  | -0.08       | -5.29e-04       | 1.00        | 2.94e-07        | 5.42e-04        | [-0.01, 0.01]          |
| Essential_Tremor_Probabilistic_Mapping_pGPe_R  | 0.78        | 5.26e-03        | .597        | 2.87e-05        | 5.35e-03        | [-0.01, 0.02]          |
| Essential_Tremor_Probabilistic_Mapping_pGPi_L  | -0.15       | -1.03e-03       | .966        | 1.11e-06        | 1.05e-03        | [-0.01, 0.01]          |

Table S6

*ET PRS Associations with grey matter fractional anisotropy (FA) - LeadDBS\_Atlas\_compendium (Zhang's 2017 substantia nigra segmentation & Buckner's 2011 functional Cerebellum)*

| Tract                                                    | <i>t</i>    | $\beta$         | <i>p</i>    | Eta2            | Cohens_f        | 95% CI                 |
|----------------------------------------------------------|-------------|-----------------|-------------|-----------------|-----------------|------------------------|
| Essential_Tremor_Probabilistic_Mapping_pGPI_R            | -0.52       | -3.48e-03       | .666        | 1.25e-05        | 3.54e-03        | [-0.02, 0.01]          |
| Essential_Tremor_Probabilistic_Mapping_pMeanMap_L        | 0.98        | 6.62e-03        | .524        | 4.54e-05        | 6.74e-03        | [-0.01, 0.02]          |
| Essential_Tremor_Probabilistic_Mapping_pMeanMap_R        | 1.20        | 8.06e-03        | .335        | 6.78e-05        | 8.23e-03        | [-0.01, 0.02]          |
| <b>Essential_Tremor_Probabilistic_Mapping_pRN_L</b>      | <b>2.38</b> | <b>1.60e-02</b> | <b>.038</b> | <b>2.66e-04</b> | <b>1.63e-02</b> | <b>&lt;0.01, 0.03]</b> |
| <b>Essential_Tremor_Probabilistic_Mapping_pRN_R</b>      | <b>2.98</b> | <b>1.99e-02</b> | <b>.006</b> | <b>4.15e-04</b> | <b>2.04e-02</b> | <b>[0.01, 0.03]</b>    |
| Essential_Tremor_Probabilistic_Mapping_pSignificantMap_L | 1.46        | 9.85e-03        | .400        | 9.93e-05        | 9.97e-03        | [-0.01, 0.02]          |
| Essential_Tremor_Probabilistic_Mapping_pSignificantMap_R | 1.04        | 6.98e-03        | .466        | 5.05e-05        | 7.11e-03        | [-0.01, 0.02]          |
| Essential_Tremor_Probabilistic_Mapping_pSTN_L            | 0.44        | 2.96e-03        | 1.00        | 8.94e-06        | 2.99e-03        | [-0.01, 0.02]          |
| Essential_Tremor_Probabilistic_Mapping_pSTN_R            | -0.19       | -1.25e-03       | 1.00        | 1.63e-06        | 1.28e-03        | [-0.01, 0.01]          |
| Essential_Tremor_Probabilistic_Mapping_pVIM_L            | 0.36        | 2.44e-03        | .788        | 6.21e-06        | 2.49e-03        | [-0.01, 0.02]          |
| Essential_Tremor_Probabilistic_Mapping_pVIM_R            | 0.60        | 4.05e-03        | .600        | 1.71e-05        | 4.14e-03        | [-0.01, 0.02]          |
| left_amygdala                                            | 1.02        | 6.58e-03        | .394        | 4.90e-05        | 7.00e-03        | [-0.01, 0.02]          |
| left_caudate                                             | -2.05       | -1.33e-02       | .056        | 1.96e-04        | 1.40e-02        | [-0.03, -0.01]         |
| left_globus_pallidus_externa                             | -0.12       | -7.77e-04       | .997        | 6.47e-07        | 8.04e-04        | [-0.01, 0.01]          |
| left_globus_pallidus_interna                             | -0.02       | -1.62e-04       | 1.00        | 2.74e-08        | 1.66e-04        | [-0.01, 0.01]          |
| left_hippocampus                                         | -0.09       | -5.33e-04       | 1.00        | 3.44e-07        | 5.87e-04        | [-0.01, 0.01]          |
| left_nucleus_accumbens                                   | 0.58        | 3.67e-03        | .689        | 1.56e-05        | 3.96e-03        | [-0.01, 0.02]          |
| left_putamen                                             | 0.43        | 2.74e-03        | .738        | 8.48e-06        | 2.91e-03        | [-0.01, 0.02]          |
| <b>left_red_nucleus</b>                                  | <b>2.60</b> | <b>1.75e-02</b> | <b>.025</b> | <b>3.17e-04</b> | <b>1.78e-02</b> | <b>&lt;0.01, 0.03]</b> |
| left_substantia_nigra                                    | -0.85       | -5.75e-03       | .477        | 3.37e-05        | 5.81e-03        | [-0.02, 0.01]          |
| left_subthalamic_nucleus                                 | 0.57        | 3.86e-03        | .836        | 1.52e-05        | 3.90e-03        | [-0.01, 0.02]          |

Table S6

*ET PRS Associations with grey matter fractional anisotropy (FA) - LeadDBS\_Atlas\_compendium (Zhang's 2017 substantia nigra segmentation & Buckner's 2011 functional Cerebellum)*

| Tract                         | <i>t</i>    | $\beta$         | <i>p</i>    | Eta2            | Cohens_f        | 95% CI              |
|-------------------------------|-------------|-----------------|-------------|-----------------|-----------------|---------------------|
| left_thalamus                 | -0.34       | -2.27e-03       | .894        | 5.54e-06        | 2.35e-03        | [-0.02, 0.01]       |
| right_amygdala                | 1.52        | 9.75e-03        | .157        | 1.08e-04        | 1.04e-02        | [-0.01, 0.02]       |
| right_caudate                 | -1.31       | -8.51e-03       | .246        | 8.02e-05        | 8.96e-03        | [-0.02, <0.01]      |
| right_globus_pallidus_externa | 0.50        | 3.38e-03        | .844        | 1.19e-05        | 3.46e-03        | [-0.01, 0.02]       |
| right_globus_pallidus_Interna | -0.79       | -5.35e-03       | .521        | 2.96e-05        | 5.44e-03        | [-0.02, 0.01]       |
| right_hippocampus             | 0.51        | 3.15e-03        | .673        | 1.20e-05        | 3.47e-03        | [-0.01, 0.02]       |
| right_nucleus_accumbens       | 0.89        | 5.59e-03        | .459        | 3.68e-05        | 6.06e-03        | [-0.01, 0.02]       |
| right_putamen                 | 0.99        | 6.30e-03        | .507        | 4.58e-05        | 6.77e-03        | [-0.01, 0.02]       |
| <b>right_red_nucleus</b>      | <b>3.18</b> | <b>2.13e-02</b> | <b>.003</b> | <b>4.75e-04</b> | <b>2.18e-02</b> | <b>[0.01, 0.03]</b> |
| right_substantia_nigra        | -0.53       | -3.56e-03       | .728        | 1.32e-05        | 3.63e-03        | [-0.02, 0.01]       |
| right_subthalamic_nucleus     | -0.29       | -1.93e-03       | .905        | 3.89e-06        | 1.97e-03        | [-0.02, 0.01]       |
| right_thalamus                | -0.02       | -1.31e-04       | 1.00        | 1.82e-08        | 1.35e-04        | [-0.01, 0.01]       |
| SN1_LH                        | -1.30       | -8.76e-03       | .304        | 7.93e-05        | 8.91e-03        | [-0.02, <0.01]      |
| SN1_RH                        | -1.06       | -7.07e-03       | .415        | 5.28e-05        | 7.26e-03        | [-0.02, 0.01]       |
| SN2_LH                        | -0.18       | -1.21e-03       | 1.00        | 1.49e-06        | 1.22e-03        | [-0.01, 0.01]       |
| SN2_RH                        | -0.24       | -1.61e-03       | .988        | 2.75e-06        | 1.66e-03        | [-0.01, 0.01]       |
| SN3_LH                        | 0.37        | 2.47e-03        | .783        | 6.41e-06        | 2.53e-03        | [-0.01, 0.02]       |
| SN3_RH                        | 0.80        | 5.34e-03        | .666        | 3.00e-05        | 5.48e-03        | [-0.01, 0.02]       |
| T1_LH                         | -0.46       | -2.97e-03       | .789        | 9.90e-06        | 3.15e-03        | [-0.02, 0.01]       |
| T1_RH                         | -0.29       | -1.84e-03       | .853        | 3.81e-06        | 1.95e-03        | [-0.01, 0.01]       |
| T2_LH                         | 0.12        | 7.91e-04        | .995        | 6.80e-07        | 8.25e-04        | [-0.01, 0.01]       |
| T2_RH                         | 0.17        | 1.08e-03        | .956        | 1.28e-06        | 1.13e-03        | [-0.01, 0.01]       |
| T3_LH                         | -0.03       | -2.04e-04       | 1.00        | 4.43e-08        | 2.10e-04        | [-0.01, 0.01]       |

**Table S6**

***ET PRS Associations with grey matter fractional anisotropy (FA) - LeadDBS\_Atlas\_compendium (Zhang's 2017 substantia nigra segmentation & Buckner's 2011 functional Cerebellum)***

| Tract                                         | <i>t</i> | $\beta$   | <i>p</i> | Eta2     | Cohens_f | 95% CI        |
|-----------------------------------------------|----------|-----------|----------|----------|----------|---------------|
| T3_RH                                         | 0.04     | 2.93e-04  | 1.00     | 9.11e-08 | 3.02e-04 | [-0.01, 0.01] |
| talairach_label_GM_Hypothalamus               | 0.32     | 2.15e-03  | .820     | 4.95e-06 | 2.22e-03 | [-0.01, 0.02] |
| talairach_label_Left_Sublobar_GMHypothalamus  | -0.39    | -2.58e-03 | .852     | 7.09e-06 | 2.66e-03 | [-0.02, 0.01] |
| talairach_label_Right_Sublobar_GMHypothalamus | -0.28    | -1.87e-03 | .858     | 3.66e-06 | 1.91e-03 | [-0.02, 0.01] |

*Note*

\*  $p < .05$ , \*\*  $p < .01$ , \*\*\*  $p < .001$ , 95% CI(B)

**Table S7**

***ET PRS Associations with grey matter mean diffusivity (MD) - LeadDBS\_Atlas\_compendium (Buckner's 2011 functional Cerebellum)***

| Tract                                        | <i>t</i> | $\beta$   | <i>p</i> | Eta2     | Cohens_f | 95% CI         |
|----------------------------------------------|----------|-----------|----------|----------|----------|----------------|
| Cerebellar_Functional_Networks_17Networks_1  | 1.17     | 2.69e-04  | .334     | 6.40e-05 | 8.00e-03 | [-0.01, <0.01] |
| Cerebellar_Functional_Networks_17Networks_10 | 0.55     | 2.86e-04  | .739     | 1.42e-05 | 3.77e-03 | [-0.01, <0.01] |
| Cerebellar_Functional_Networks_17Networks_11 | 0.75     | 2.14e-04  | .623     | 2.64e-05 | 5.14e-03 | [-0.01, <0.01] |
| Cerebellar_Functional_Networks_17Networks_12 | 0.38     | 5.38e-05  | .922     | 6.72e-06 | 2.59e-03 | [-0.01, <0.01] |
| Cerebellar_Functional_Networks_17Networks_13 | 1.14     | 2.06e-04  | .350     | 6.08e-05 | 7.80e-03 | [-0.01, <0.01] |
| Cerebellar_Functional_Networks_17Networks_14 | 0.37     | 6.79e-05  | .873     | 6.30e-06 | 2.51e-03 | [-0.01, <0.01] |
| Cerebellar_Functional_Networks_17Networks_15 | 0.85     | 2.13e-04  | .432     | 3.42e-05 | 5.85e-03 | [-0.01, <0.01] |
| Cerebellar_Functional_Networks_17Networks_16 | 0.24     | 4.94e-05  | .987     | 2.77e-06 | 1.66e-03 | [-0.01, <0.01] |
| Cerebellar_Functional_Networks_17Networks_17 | -0.02    | -4.42e-06 | 1.00     | 2.34e-08 | 1.53e-04 | [-0.01, <0.01] |
| Cerebellar_Functional_Networks_17Networks_2  | 1.07     | 2.96e-04  | .446     | 5.38e-05 | 7.34e-03 | [-0.01, <0.01] |
| Cerebellar_Functional_Networks_17Networks_3  | 0.68     | 8.99e-05  | .606     | 2.17e-05 | 4.66e-03 | [-0.01, <0.01] |
| Cerebellar_Functional_Networks_17Networks_4  | 0.52     | 6.73e-05  | .741     | 1.25e-05 | 3.53e-03 | [-0.01, <0.01] |
| Cerebellar_Functional_Networks_17Networks_5  | -0.45    | -6.43e-05 | .717     | 9.57e-06 | 3.09e-03 | [-0.01, <0.01] |

Table S7

*ET PRS Associations with grey matter mean diffusivity (MD) - LeadDBS\_Atlas\_compendium (Buckner's 2011 functional Cerebellum)*

| Tract                                          | <i>t</i> | $\beta$   | <i>p</i> | Eta2     | Cohens_f | 95% CI         |
|------------------------------------------------|----------|-----------|----------|----------|----------|----------------|
| Cerebellar_Functional_Networks_17Networks_6    | 0.93     | 1.79e-04  | .432     | 4.03e-05 | 6.35e-03 | [-0.01, <0.01] |
| Cerebellar_Functional_Networks_17Networks_7    | 1.10     | 1.54e-04  | .370     | 5.72e-05 | 7.56e-03 | [-0.01, <0.01] |
| Cerebellar_Functional_Networks_17Networks_8    | 0.98     | 1.77e-04  | .398     | 4.53e-05 | 6.73e-03 | [-0.01, <0.01] |
| Cerebellar_Functional_Networks_17Networks_9    | 0.57     | 8.81e-05  | .625     | 1.53e-05 | 3.91e-03 | [-0.01, <0.01] |
| Cerebellar_Functional_Networks_7Networks_1     | 0.99     | 2.25e-04  | .397     | 4.55e-05 | 6.75e-03 | [-0.01, <0.01] |
| Cerebellar_Functional_Networks_7Networks_2     | 0.72     | 9.86e-05  | .576     | 2.43e-05 | 4.93e-03 | [-0.01, <0.01] |
| Cerebellar_Functional_Networks_7Networks_3     | 0.75     | 1.39e-04  | .502     | 2.60e-05 | 5.10e-03 | [-0.01, <0.01] |
| Cerebellar_Functional_Networks_7Networks_4     | 1.17     | 1.74e-04  | .331     | 6.44e-05 | 8.03e-03 | [-0.01, <0.01] |
| Cerebellar_Functional_Networks_7Networks_5     | 0.60     | 9.97e-05  | .604     | 1.69e-05 | 4.11e-03 | [-0.01, <0.01] |
| Cerebellar_Functional_Networks_7Networks_6     | 0.98     | 1.57e-04  | .450     | 4.50e-05 | 6.71e-03 | [-0.01, <0.01] |
| Cerebellar_Functional_Networks_7Networks_7     | 0.25     | 4.86e-05  | .884     | 2.90e-06 | 1.70e-03 | [-0.01, <0.01] |
| DBS_targets_ET_VIM_L                           | 0.06     | 9.85e-06  | 1.00     | 1.82e-07 | 4.26e-04 | [-0.01, <0.01] |
| DBS_targets_ET_VIM_R                           | 0.06     | 9.48e-06  | 1.00     | 1.64e-07 | 4.05e-04 | [-0.01, <0.01] |
| Essential_Tremor_Hypointensity_Coldspot_L      | -0.62    | -1.24e-04 | .990     | 1.83e-05 | 4.27e-03 | [-0.01, <0.01] |
| Essential_Tremor_Hypointensity_Coldspot_R      | -0.34    | -6.93e-05 | .899     | 5.36e-06 | 2.31e-03 | [-0.01, <0.01] |
| Essential_Tremor_Hypointensity_gm_mask         | -0.29    | -4.19e-05 | .852     | 3.84e-06 | 1.96e-03 | [-0.01, <0.01] |
| Essential_Tremor_Hypointensity_GPe_L           | 0.09     | 1.33e-05  | 1.00     | 3.42e-07 | 5.85e-04 | [-0.01, <0.01] |
| Essential_Tremor_Hypointensity_GPe_R           | -0.27    | -4.24e-05 | .865     | 3.44e-06 | 1.86e-03 | [-0.01, <0.01] |
| Essential_Tremor_Hypointensity_GPi_L           | 0.28     | 5.32e-05  | .898     | 3.80e-06 | 1.95e-03 | [-0.01, <0.01] |
| Essential_Tremor_Hypointensity_GPi_R           | -0.46    | -8.80e-05 | .707     | 1.01e-05 | 3.17e-03 | [-0.01, <0.01] |
| Essential_Tremor_Hypointensity_Hotspot_L       | -0.53    | -8.63e-05 | .816     | 1.34e-05 | 3.66e-03 | [-0.01, <0.01] |
| Essential_Tremor_Hypointensity_Hotspot_R       | -0.40    | -7.07e-05 | .935     | 7.55e-06 | 2.75e-03 | [-0.01, <0.01] |
| Essential_Tremor_Hypointensity_Hypointensity_L | -0.42    | -6.92e-05 | .742     | 8.26e-06 | 2.87e-03 | [-0.01, <0.01] |

**Table S7**

***ET PRS Associations with grey matter mean diffusivity (MD) - LeadDBS\_Atlas\_compendium (Buckner's 2011 functional Cerebellum)***

| Tract                                                    | <i>t</i> | $\beta$   | <i>p</i> | Eta2     | Cohens_f | 95% CI         |
|----------------------------------------------------------|----------|-----------|----------|----------|----------|----------------|
| Essential_Tremor_Hypointensity_Hypointensity_R           | -0.46    | -6.63e-05 | .990     | 1.00e-05 | 3.17e-03 | [-0.01, <0.01] |
| Essential_Tremor_Hypointensity_RN_L                      | -0.41    | -7.96e-05 | .794     | 7.86e-06 | 2.80e-03 | [-0.01, <0.01] |
| Essential_Tremor_Hypointensity_RN_R                      | -0.60    | -1.21e-04 | .752     | 1.70e-05 | 4.12e-03 | [-0.01, <0.01] |
| Essential_Tremor_Hypointensity_STN_L                     | -0.81    | -1.95e-04 | .578     | 3.04e-05 | 5.51e-03 | [-0.01, <0.01] |
| Essential_Tremor_Hypointensity_STN_R                     | -0.72    | -1.82e-04 | .530     | 2.42e-05 | 4.92e-03 | [-0.01, <0.01] |
| Essential_Tremor_Hypointensity_VIM_L                     | -0.30    | -4.24e-05 | 1.00     | 4.20e-06 | 2.05e-03 | [-0.01, <0.01] |
| Essential_Tremor_Hypointensity_VIM_R                     | -0.28    | -3.90e-05 | .949     | 3.78e-06 | 1.94e-03 | [-0.01, <0.01] |
| Essential_Tremor_Probabilistic_Mapping_pGPe_L            | 0.09     | 1.33e-05  | 1.00     | 3.42e-07 | 5.85e-04 | [-0.01, <0.01] |
| Essential_Tremor_Probabilistic_Mapping_pGPe_R            | -0.27    | -4.24e-05 | .865     | 3.44e-06 | 1.86e-03 | [-0.01, <0.01] |
| Essential_Tremor_Probabilistic_Mapping_pGPi_L            | 0.28     | 5.32e-05  | .898     | 3.80e-06 | 1.95e-03 | [-0.01, <0.01] |
| Essential_Tremor_Probabilistic_Mapping_pGPi_R            | -0.46    | -8.80e-05 | .707     | 1.01e-05 | 3.17e-03 | [-0.01, <0.01] |
| Essential_Tremor_Probabilistic_Mapping_pMeanMap_L        | -0.53    | -8.42e-05 | .727     | 1.33e-05 | 3.64e-03 | [-0.01, <0.01] |
| Essential_Tremor_Probabilistic_Mapping_pMeanMap_R        | -0.76    | -1.23e-04 | .617     | 2.69e-05 | 5.19e-03 | [-0.01, <0.01] |
| Essential_Tremor_Probabilistic_Mapping_pRN_L             | -0.41    | -7.96e-05 | .794     | 7.86e-06 | 2.80e-03 | [-0.01, <0.01] |
| Essential_Tremor_Probabilistic_Mapping_pRN_R             | -0.60    | -1.21e-04 | .752     | 1.70e-05 | 4.12e-03 | [-0.01, <0.01] |
| Essential_Tremor_Probabilistic_Mapping_pSignificantMap_L | -0.57    | -9.89e-05 | .779     | 1.54e-05 | 3.92e-03 | [-0.01, <0.01] |
| Essential_Tremor_Probabilistic_Mapping_pSignificantMap_R | -0.46    | -8.08e-05 | 1.00     | 9.84e-06 | 3.14e-03 | [-0.01, <0.01] |
| Essential_Tremor_Probabilistic_Mapping_pSTN_L            | -0.81    | -1.95e-04 | .578     | 3.04e-05 | 5.51e-03 | [-0.01, <0.01] |
| Essential_Tremor_Probabilistic_Mapping_pSTN_R            | -0.72    | -1.82e-04 | .530     | 2.42e-05 | 4.92e-03 | [-0.01, <0.01] |
| Essential_Tremor_Probabilistic_Mapping_pVIM_L            | -0.30    | -4.24e-05 | 1.00     | 4.20e-06 | 2.05e-03 | [-0.01, <0.01] |
| Essential_Tremor_Probabilistic_Mapping_pVIM_R            | -0.28    | -3.90e-05 | .949     | 3.78e-06 | 1.94e-03 | [-0.01, <0.01] |

Table S7

*ET PRS Associations with grey matter mean diffusivity (MD) - LeadDBS\_Atlas\_compendium (Buckner's 2011 functional Cerebellum)*

| Tract                         | <i>t</i>    | $\beta$         | <i>p</i>    | Eta2            | Cohens_f        | 95% CI                     |
|-------------------------------|-------------|-----------------|-------------|-----------------|-----------------|----------------------------|
| left_amygdala                 | 0.20        | 2.65e-05        | .925        | 1.90e-06        | 1.38e-03        | [-0.01, <0.01]             |
| left_caudate                  | 1.52        | 3.64e-04        | .158        | 1.08e-04        | 1.04e-02        | [-0.01, <0.01]             |
| left_globus_pallidus_externa  | 0.13        | 1.99e-05        | .990        | 7.45e-07        | 8.63e-04        | [-0.01, <0.01]             |
| left_globus_pallidus_interna  | 0.35        | 6.53e-05        | .891        | 5.64e-06        | 2.37e-03        | [-0.01, <0.01]             |
| <b>left_hippocampus</b>       | <b>2.19</b> | <b>3.66e-04</b> | <b>.034</b> | <b>2.26e-04</b> | <b>1.50e-02</b> | <b>&lt;0.01, &lt;0.01]</b> |
| left_nucleus_accumbens        | -0.32       | -6.32e-05       | .949        | 4.77e-06        | 2.18e-03        | [-0.01, <0.01]             |
| left_putamen                  | 1.05        | 1.33e-04        | .358        | 5.19e-05        | 7.20e-03        | [-0.01, <0.01]             |
| left_red_nucleus              | -0.49       | -9.88e-05       | .764        | 1.12e-05        | 3.34e-03        | [-0.01, <0.01]             |
| left_substantia_nigra         | 0.40        | 9.24e-05        | .756        | 7.59e-06        | 2.75e-03        | [-0.01, <0.01]             |
| left_subthalamic_nucleus      | -0.90       | -2.26e-04       | .507        | 3.78e-05        | 6.15e-03        | [-0.01, <0.01]             |
| left_thalamus                 | 1.60        | 2.30e-04        | .151        | 1.20e-04        | 1.09e-02        | [-0.01, <0.01]             |
| right_amygdala                | -0.23       | -3.11e-05       | .896        | 2.59e-06        | 1.61e-03        | [-0.01, <0.01]             |
| right_caudate                 | 1.02        | 2.88e-04        | .339        | 4.87e-05        | 6.98e-03        | [-0.01, <0.01]             |
| right_globus_pallidus_externa | -0.15       | -2.37e-05       | .970        | 1.03e-06        | 1.02e-03        | [-0.01, <0.01]             |
| right_globus_pallidus_Interna | -0.37       | -6.68e-05       | .784        | 6.35e-06        | 2.52e-03        | [-0.01, <0.01]             |
| right_hippocampus             | 1.03        | 1.65e-04        | .370        | 4.97e-05        | 7.05e-03        | [-0.01, <0.01]             |
| right_nucleus_accumbens       | -0.36       | -6.96e-05       | .789        | 6.13e-06        | 2.48e-03        | [-0.01, <0.01]             |
| right_putamen                 | 0.65        | 8.31e-05        | .564        | 2.01e-05        | 4.48e-03        | [-0.01, <0.01]             |
| right_red_nucleus             | -0.63       | -1.30e-04       | .723        | 1.89e-05        | 4.34e-03        | [-0.01, <0.01]             |
| right_substantia_nigra        | -0.46       | -9.95e-05       | .788        | 9.95e-06        | 3.15e-03        | [-0.01, <0.01]             |
| right_subthalamic_nucleus     | -0.72       | -1.87e-04       | .521        | 2.41e-05        | 4.91e-03        | [-0.01, <0.01]             |
| right_thalamus                | 0.91        | 1.33e-04        | .398        | 3.90e-05        | 6.24e-03        | [-0.01, <0.01]             |
| SN1_LH                        | 0.47        | 1.33e-04        | .781        | 1.03e-05        | 3.21e-03        | [-0.01, <0.01]             |

**Table S7**

***ET PRS Associations with grey matter mean diffusivity (MD) - LeadDBS\_Atlas\_compendium (Buckner's 2011 functional Cerebellum)***

| Tract                                         | <i>t</i> | $\beta$   | <i>p</i> | Eta2     | Cohens_f | 95% CI         |
|-----------------------------------------------|----------|-----------|----------|----------|----------|----------------|
| SN1_RH                                        | -0.42    | -1.13e-04 | .923     | 8.46e-06 | 2.91e-03 | [-0.01, <0.01] |
| SN2_LH                                        | 0.02     | 3.72e-06  | 1.00     | 1.19e-08 | 1.09e-04 | [-0.01, <0.01] |
| SN2_RH                                        | -1.12    | -2.63e-04 | .333     | 5.88e-05 | 7.67e-03 | [-0.01, <0.01] |
| SN3_LH                                        | -0.55    | -1.25e-04 | .642     | 1.41e-05 | 3.75e-03 | [-0.01, <0.01] |
| SN3_RH                                        | -1.62    | -3.72e-04 | .166     | 1.23e-04 | 1.11e-02 | [-0.01, <0.01] |
| T1_LH                                         | 0.53     | 6.33e-05  | .657     | 1.31e-05 | 3.62e-03 | [-0.01, <0.01] |
| T1_RH                                         | 1.02     | 1.24e-04  | .377     | 4.88e-05 | 6.98e-03 | [-0.01, <0.01] |
| T2_LH                                         | 1.13     | 1.53e-04  | .443     | 5.96e-05 | 7.72e-03 | [-0.01, <0.01] |
| T2_RH                                         | 0.71     | 9.73e-05  | .558     | 2.34e-05 | 4.84e-03 | [-0.01, <0.01] |
| T3_LH                                         | 1.11     | 1.34e-04  | .328     | 5.74e-05 | 7.58e-03 | [-0.01, <0.01] |
| T3_RH                                         | 0.59     | 7.00e-05  | .683     | 1.60e-05 | 4.01e-03 | [-0.01, <0.01] |
| talairach_label_GM_Hypothalamus               | 1.18     | 4.83e-04  | .325     | 6.56e-05 | 8.10e-03 | [-0.01, <0.01] |
| talairach_label_Left_Sublobar_GMHypothalamus  | 0.95     | 2.44e-04  | .420     | 4.20e-05 | 6.48e-03 | [-0.01, <0.01] |
| talairach_label_Right_Sublobar_GMHypothalamus | 0.39     | 1.04e-04  | .847     | 7.08e-06 | 2.66e-03 | [-0.01, <0.01] |

*Note*

\*  $p < .05$ , \*\*  $p < .01$ , \*\*\*  $p < .001$ , 95% CI(B)

**Table S8**

***ET PRS Associations with grey matter radial diffusivity (RD) - LeadDBS\_Atlas\_compendium***

| Tract                                        | <i>t</i> | $\beta$  | <i>p</i> | Eta2     | Cohens_f | 95% CI        |
|----------------------------------------------|----------|----------|----------|----------|----------|---------------|
| Cerebellar_Functional_Networks_17Networks_1  | 1.18     | 5.75e-03 | .290     | 6.55e-05 | 8.09e-03 | [-0.01, 0.02] |
| Cerebellar_Functional_Networks_17Networks_10 | 0.66     | 4.11e-03 | .697     | 2.07e-05 | 4.55e-03 | [-0.01, 0.02] |
| Cerebellar_Functional_Networks_17Networks_11 | 0.73     | 3.86e-03 | .735     | 2.47e-05 | 4.97e-03 | [-0.01, 0.01] |
| Cerebellar_Functional_Networks_17Networks_12 | 0.45     | 1.61e-03 | .795     | 9.64e-06 | 3.10e-03 | [-0.01, 0.01] |



**Table S8**

***ET PRS Associations with grey matter radial diffusivity (RD) - LeadDBS\_Atlas\_compendium***

| Tract                                        | <i>t</i> | $\beta$   | <i>p</i> | Eta2     | Cohens_f | 95% CI        |
|----------------------------------------------|----------|-----------|----------|----------|----------|---------------|
| Cerebellar_Functional_Networks_17Networks_13 | 0.89     | 3.54e-03  | .517     | 3.67e-05 | 6.06e-03 | [-0.01, 0.01] |
| Cerebellar_Functional_Networks_17Networks_14 | 0.48     | 2.08e-03  | .769     | 1.09e-05 | 3.31e-03 | [-0.01, 0.01] |
| Cerebellar_Functional_Networks_17Networks_15 | 0.84     | 4.28e-03  | .487     | 3.34e-05 | 5.78e-03 | [-0.01, 0.01] |
| Cerebellar_Functional_Networks_17Networks_16 | 0.31     | 1.42e-03  | .829     | 4.62e-06 | 2.15e-03 | [-0.01, 0.01] |
| Cerebellar_Functional_Networks_17Networks_17 | 0.03     | 1.53e-04  | 1.00     | 5.53e-08 | 2.35e-04 | [-0.01, 0.01] |
| Cerebellar_Functional_Networks_17Networks_2  | 1.06     | 5.66e-03  | .452     | 5.30e-05 | 7.28e-03 | [-0.01, 0.02] |
| Cerebellar_Functional_Networks_17Networks_3  | 0.71     | 2.41e-03  | .529     | 2.33e-05 | 4.83e-03 | [-0.01, 0.01] |
| Cerebellar_Functional_Networks_17Networks_4  | 0.56     | 1.90e-03  | .702     | 1.48e-05 | 3.85e-03 | [-0.01, 0.01] |
| Cerebellar_Functional_Networks_17Networks_5  | -0.42    | -1.50e-03 | .742     | 8.26e-06 | 2.87e-03 | [-0.01, 0.01] |
| Cerebellar_Functional_Networks_17Networks_6  | 0.94     | 4.11e-03  | .479     | 4.12e-05 | 6.42e-03 | [-0.01, 0.01] |
| Cerebellar_Functional_Networks_17Networks_7  | 1.17     | 4.15e-03  | .330     | 6.47e-05 | 8.04e-03 | [-0.01, 0.01] |
| Cerebellar_Functional_Networks_17Networks_8  | 1.03     | 4.31e-03  | .369     | 4.99e-05 | 7.06e-03 | [-0.01, 0.01] |
| Cerebellar_Functional_Networks_17Networks_9  | 0.42     | 1.52e-03  | .743     | 8.20e-06 | 2.86e-03 | [-0.01, 0.01] |
| Cerebellar_Functional_Networks_7Networks_1   | 0.95     | 4.65e-03  | .469     | 4.25e-05 | 6.52e-03 | [-0.01, 0.01] |
| Cerebellar_Functional_Networks_7Networks_2   | 0.74     | 2.60e-03  | .562     | 2.56e-05 | 5.06e-03 | [-0.01, 0.01] |
| Cerebellar_Functional_Networks_7Networks_3   | 0.79     | 3.41e-03  | .472     | 2.93e-05 | 5.41e-03 | [-0.01, 0.01] |
| Cerebellar_Functional_Networks_7Networks_4   | 1.23     | 4.54e-03  | .266     | 7.13e-05 | 8.45e-03 | [-0.01, 0.01] |
| Cerebellar_Functional_Networks_7Networks_5   | 0.48     | 1.87e-03  | .690     | 1.10e-05 | 3.32e-03 | [-0.01, 0.01] |
| Cerebellar_Functional_Networks_7Networks_6   | 0.85     | 3.23e-03  | .545     | 3.37e-05 | 5.81e-03 | [-0.01, 0.01] |
| Cerebellar_Functional_Networks_7Networks_7   | 0.27     | 1.19e-03  | .867     | 3.38e-06 | 1.84e-03 | [-0.01, 0.01] |
| DBS_targets_ET_VIM_L                         | 0.01     | 5.02e-05  | 1.00     | 7.68e-09 | 8.76e-05 | [-0.01, 0.01] |
| DBS_targets_ET_VIM_R                         | 0.04     | 1.62e-04  | 1.00     | 7.96e-08 | 2.82e-04 | [-0.01, 0.01] |
| Essential_Tremor_Hypointensity_Coldspot_L    | -0.68    | -3.19e-03 | .947     | 2.18e-05 | 4.67e-03 | [-0.01, 0.01] |
| Essential_Tremor_Hypointensity_Coldspot_R    | -0.25    | -1.15e-03 | .883     | 2.94e-06 | 1.71e-03 | [-0.01, 0.01] |

**Table S8**

***ET PRS Associations with grey matter radial diffusivity (RD) - LeadDBS\_Atlas\_compendium***

| Tract                                             | <i>t</i> | $\beta$   | <i>p</i> | Eta2     | Cohens_f | 95% CI         |
|---------------------------------------------------|----------|-----------|----------|----------|----------|----------------|
| Essential_Tremor_Hypointensity_gm_mask            | -0.27    | -1.01e-03 | .862     | 3.53e-06 | 1.88e-03 | [-0.01, 0.01]  |
| Essential_Tremor_Hypointensity_GPe_L              | 0.21     | 8.08e-04  | .918     | 2.05e-06 | 1.43e-03 | [-0.01, 0.01]  |
| Essential_Tremor_Hypointensity_GPe_R              | -0.34    | -1.32e-03 | .809     | 5.36e-06 | 2.31e-03 | [-0.01, 0.01]  |
| Essential_Tremor_Hypointensity_GPi_L              | 0.41     | 1.83e-03  | .895     | 7.97e-06 | 2.82e-03 | [-0.01, 0.01]  |
| Essential_Tremor_Hypointensity_GPi_R              | -0.23    | -1.02e-03 | .902     | 2.44e-06 | 1.56e-03 | [-0.01, 0.01]  |
| Essential_Tremor_Hypointensity_Hotspot_L          | -0.65    | -2.59e-03 | .629     | 1.99e-05 | 4.46e-03 | [-0.01, 0.01]  |
| Essential_Tremor_Hypointensity_Hotspot_R          | -0.57    | -2.37e-03 | .801     | 1.50e-05 | 3.87e-03 | [-0.01, 0.01]  |
| Essential_Tremor_Hypointensity_Hypointensity_L    | -0.54    | -2.11e-03 | .649     | 1.36e-05 | 3.69e-03 | [-0.01, 0.01]  |
| Essential_Tremor_Hypointensity_Hypointensity_R    | -0.58    | -2.04e-03 | .975     | 1.55e-05 | 3.94e-03 | [-0.01, <0.01] |
| Essential_Tremor_Hypointensity_RN_L               | -0.60    | -2.69e-03 | .673     | 1.67e-05 | 4.08e-03 | [-0.01, 0.01]  |
| Essential_Tremor_Hypointensity_RN_R               | -0.97    | -4.46e-03 | .607     | 4.43e-05 | 6.65e-03 | [-0.01, <0.01] |
| Essential_Tremor_Hypointensity_STN_L              | -0.73    | -3.78e-03 | .636     | 2.53e-05 | 5.03e-03 | [-0.01, 0.01]  |
| Essential_Tremor_Hypointensity_STN_R              | -0.52    | -2.71e-03 | .738     | 1.26e-05 | 3.56e-03 | [-0.01, 0.01]  |
| Essential_Tremor_Hypointensity_VIM_L              | -0.26    | -9.24e-04 | .874     | 3.17e-06 | 1.78e-03 | [-0.01, 0.01]  |
| Essential_Tremor_Hypointensity_VIM_R              | -0.36    | -1.23e-03 | .952     | 5.98e-06 | 2.45e-03 | [-0.01, 0.01]  |
| Essential_Tremor_Probabilistic_Mapping_pGPe_L     | 0.21     | 8.08e-04  | .918     | 2.05e-06 | 1.43e-03 | [-0.01, 0.01]  |
| Essential_Tremor_Probabilistic_Mapping_pGPe_R     | -0.34    | -1.32e-03 | .809     | 5.36e-06 | 2.31e-03 | [-0.01, 0.01]  |
| Essential_Tremor_Probabilistic_Mapping_pGPi_L     | 0.41     | 1.83e-03  | .895     | 7.97e-06 | 2.82e-03 | [-0.01, 0.01]  |
| Essential_Tremor_Probabilistic_Mapping_pGPi_R     | -0.23    | -1.02e-03 | .902     | 2.44e-06 | 1.56e-03 | [-0.01, 0.01]  |
| Essential_Tremor_Probabilistic_Mapping_pMeanMap_L | -0.60    | -2.33e-03 | .672     | 1.67e-05 | 4.09e-03 | [-0.01, 0.01]  |
| Essential_Tremor_Probabilistic_Mapping_pMeanMap_R | -0.89    | -3.52e-03 | .589     | 3.70e-05 | 6.08e-03 | [-0.01, <0.01] |
| Essential_Tremor_Probabilistic_Mapping_pRN_L      | -0.60    | -2.69e-03 | .673     | 1.67e-05 | 4.08e-03 | [-0.01, 0.01]  |
| Essential_Tremor_Probabilistic_Mapping_pRN_R      | -0.97    | -4.46e-03 | .607     | 4.43e-05 | 6.65e-03 | [-0.01, <0.01] |

**Table S8**

***ET PRS Associations with grey matter radial diffusivity (RD) - LeadDBS\_Atlas\_compendium***

| Tract                                                    | <i>t</i>    | $\beta$         | <i>p</i>    | Eta2            | Cohens_f        | 95% CI                 |
|----------------------------------------------------------|-------------|-----------------|-------------|-----------------|-----------------|------------------------|
| Essential_Tremor_Probabilistic_Mapping_pSignificantMap_L | -0.76       | -3.18e-03       | .614        | 2.72e-05        | 5.21e-03        | [-0.01, 0.01]          |
| Essential_Tremor_Probabilistic_Mapping_pSignificantMap_R | -0.64       | -2.71e-03       | .746        | 1.94e-05        | 4.41e-03        | [-0.01, 0.01]          |
| Essential_Tremor_Probabilistic_Mapping_pSTN_L            | -0.73       | -3.78e-03       | .636        | 2.53e-05        | 5.03e-03        | [-0.01, 0.01]          |
| Essential_Tremor_Probabilistic_Mapping_pSTN_R            | -0.52       | -2.71e-03       | .738        | 1.26e-05        | 3.56e-03        | [-0.01, 0.01]          |
| Essential_Tremor_Probabilistic_Mapping_pVIM_L            | -0.26       | -9.24e-04       | .874        | 3.17e-06        | 1.78e-03        | [-0.01, 0.01]          |
| Essential_Tremor_Probabilistic_Mapping_pVIM_R            | -0.36       | -1.23e-03       | .952        | 5.98e-06        | 2.45e-03        | [-0.01, 0.01]          |
| left_amygdala                                            | 0.09        | 3.16e-04        | 1.00        | 4.05e-07        | 6.36e-04        | [-0.01, 0.01]          |
| left_caudate                                             | 1.64        | 7.80e-03        | .124        | 1.26e-04        | 1.12e-02        | [-0.01, 0.02]          |
| left_globus_pallidus_externa                             | 0.25        | 9.54e-04        | .887        | 2.82e-06        | 1.68e-03        | [-0.01, 0.01]          |
| left_globus_pallidus_interna                             | 0.45        | 1.99e-03        | .900        | 9.36e-06        | 3.06e-03        | [-0.01, 0.01]          |
| <b>left_hippocampus</b>                                  | <b>2.20</b> | <b>8.68e-03</b> | <b>.034</b> | <b>2.27e-04</b> | <b>1.51e-02</b> | <b>&lt;0.01, 0.02]</b> |
| left_nucleus_accumbens                                   | -0.36       | -1.62e-03       | .917        | 6.02e-06        | 2.45e-03        | [-0.01, 0.01]          |
| left_putamen                                             | 1.04        | 3.39e-03        | .466        | 5.06e-05        | 7.12e-03        | [-0.01, 0.01]          |
| left_red_nucleus                                         | -0.72       | -3.35e-03       | .574        | 2.45e-05        | 4.95e-03        | [-0.01, 0.01]          |
| left_substantia_nigra                                    | 0.64        | 3.23e-03        | .575        | 1.91e-05        | 4.37e-03        | [-0.01, 0.01]          |
| left_subthalamic_nucleus                                 | -0.84       | -4.39e-03       | .571        | 3.33e-05        | 5.77e-03        | [-0.01, 0.01]          |
| left_thalamus                                            | 1.74        | 6.07e-03        | .101        | 1.41e-04        | 1.19e-02        | [-0.01, 0.01]          |
| right_amygdala                                           | -0.42       | -1.41e-03       | .745        | 8.10e-06        | 2.85e-03        | [-0.01, 0.01]          |
| right_caudate                                            | 1.08        | 5.44e-03        | .310        | 5.42e-05        | 7.36e-03        | [-0.01, 0.02]          |
| right_globus_pallidus_externa                            | -0.17       | -6.85e-04       | .968        | 1.41e-06        | 1.19e-03        | [-0.01, 0.01]          |
| right_globus_pallidus_Interna                            | -0.08       | -3.46e-04       | 1.00        | 2.97e-07        | 5.45e-04        | [-0.01, 0.01]          |
| right_hippocampus                                        | 0.99        | 3.82e-03        | .353        | 4.62e-05        | 6.80e-03        | [-0.01, 0.01]          |

**Table S8**

***ET PRS Associations with grey matter radial diffusivity (RD) - LeadDBS\_Atlas\_compendium***

| Tract                                         | <i>t</i> | $\beta$   | <i>p</i> | Eta2     | Cohens_f | 95% CI         |
|-----------------------------------------------|----------|-----------|----------|----------|----------|----------------|
| right_nucleus_accumbens                       | -0.40    | -1.79e-03 | .838     | 7.66e-06 | 2.77e-03 | [-0.01, 0.01]  |
| right_putamen                                 | 0.54     | 1.78e-03  | .646     | 1.38e-05 | 3.72e-03 | [-0.01, 0.01]  |
| right_red_nucleus                             | -1.06    | -4.97e-03 | .527     | 5.31e-05 | 7.29e-03 | [-0.01, <0.01] |
| right_substantia_nigra                        | -0.08    | -3.98e-04 | 1.00     | 3.11e-07 | 5.58e-04 | [-0.01, 0.01]  |
| right_subthalamic_nucleus                     | -0.51    | -2.68e-03 | .747     | 1.21e-05 | 3.48e-03 | [-0.01, 0.01]  |
| right_thalamus                                | 0.98     | 3.46e-03  | .360     | 4.49e-05 | 6.70e-03 | [-0.01, 0.01]  |
| SN1_LH                                        | 0.66     | 3.62e-03  | .711     | 2.06e-05 | 4.54e-03 | [-0.01, 0.01]  |
| SN1_RH                                        | 0.08     | 4.26e-04  | 1.00     | 2.89e-07 | 5.37e-04 | [-0.01, 0.01]  |
| SN2_LH                                        | 0.19     | 9.67e-04  | 1.00     | 1.76e-06 | 1.33e-03 | [-0.01, 0.01]  |
| SN2_RH                                        | -0.79    | -3.95e-03 | .541     | 2.91e-05 | 5.39e-03 | [-0.01, 0.01]  |
| SN3_LH                                        | -0.45    | -2.20e-03 | .720     | 9.40e-06 | 3.07e-03 | [-0.01, 0.01]  |
| SN3_RH                                        | -1.43    | -7.19e-03 | .283     | 9.52e-05 | 9.76e-03 | [-0.02, <0.01] |
| T1_LH                                         | 0.65     | 1.95e-03  | .568     | 1.98e-05 | 4.44e-03 | [-0.01, 0.01]  |
| T1_RH                                         | 1.00     | 3.04e-03  | .348     | 4.71e-05 | 6.86e-03 | [-0.01, 0.01]  |
| T2_LH                                         | 1.24     | 4.03e-03  | .335     | 7.17e-05 | 8.47e-03 | [-0.01, 0.01]  |
| T2_RH                                         | 0.77     | 2.55e-03  | .539     | 2.78e-05 | 5.27e-03 | [-0.01, 0.01]  |
| T3_LH                                         | 1.23     | 3.62e-03  | .269     | 7.04e-05 | 8.39e-03 | [-0.01, 0.01]  |
| T3_RH                                         | 0.67     | 1.98e-03  | .613     | 2.11e-05 | 4.60e-03 | [-0.01, 0.01]  |
| talairach_label_GM_Hypothalamus               | 1.08     | 6.44e-03  | .387     | 5.43e-05 | 7.37e-03 | [-0.01, 0.02]  |
| talairach_label_Left_Sublobar_GMHypothalamus  | 0.92     | 4.76e-03  | .394     | 3.95e-05 | 6.29e-03 | [-0.01, 0.01]  |
| talairach_label_Right_Sublobar_GMHypothalamus | 0.39     | 2.10e-03  | .883     | 7.31e-06 | 2.70e-03 | [-0.01, 0.01]  |

*Note*

\* *p* < .05, \*\* *p* < .01, \*\*\* *p* < .001, 95% CI(B)

**Table S9**

***ET PRS Associations with gray matter axial diffusivity (AD) - LeadDBS\_Atlas\_compendium***

| Tract                                        | <i>t</i> | $\beta$   | <i>p</i> | Eta2     | Cohens_f | 95% CI         |
|----------------------------------------------|----------|-----------|----------|----------|----------|----------------|
| Cerebellar_Functional_Networks_17Networks_1  | 1.14     | 9.17e-05  | .313     | 6.04e-05 | 7.77e-03 | [-0.01, <0.01] |
| Cerebellar_Functional_Networks_17Networks_10 | 0.33     | 7.23e-05  | .909     | 5.00e-06 | 2.24e-03 | [-0.01, <0.01] |
| Cerebellar_Functional_Networks_17Networks_11 | 0.78     | 8.19e-05  | .600     | 2.84e-05 | 5.33e-03 | [-0.01, <0.01] |
| Cerebellar_Functional_Networks_17Networks_12 | 0.26     | 1.46e-05  | .960     | 3.15e-06 | 1.78e-03 | [-0.01, <0.01] |
| Cerebellar_Functional_Networks_17Networks_13 | 1.20     | 1.15e-04  | .317     | 6.74e-05 | 8.21e-03 | [-0.01, <0.01] |
| Cerebellar_Functional_Networks_17Networks_14 | 0.17     | 1.19e-05  | .951     | 1.37e-06 | 1.17e-03 | [-0.01, <0.01] |
| Cerebellar_Functional_Networks_17Networks_15 | 0.86     | 7.76e-05  | .429     | 3.47e-05 | 5.89e-03 | [-0.01, <0.01] |
| Cerebellar_Functional_Networks_17Networks_16 | 0.11     | 8.50e-06  | 1.00     | 5.61e-07 | 7.49e-04 | [-0.01, <0.01] |
| Cerebellar_Functional_Networks_17Networks_17 | -0.12    | -8.87e-06 | .998     | 6.39e-07 | 7.99e-04 | [-0.01, <0.01] |
| Cerebellar_Functional_Networks_17Networks_2  | 1.08     | 1.06e-04  | .487     | 5.49e-05 | 7.41e-03 | [-0.01, <0.01] |
| Cerebellar_Functional_Networks_17Networks_3  | 0.63     | 3.24e-05  | .647     | 1.86e-05 | 4.31e-03 | [-0.01, <0.01] |
| Cerebellar_Functional_Networks_17Networks_4  | 0.44     | 2.21e-05  | .807     | 9.03e-06 | 3.01e-03 | [-0.01, <0.01] |
| Cerebellar_Functional_Networks_17Networks_5  | -0.50    | -2.77e-05 | .758     | 1.15e-05 | 3.39e-03 | [-0.01, <0.01] |
| Cerebellar_Functional_Networks_17Networks_6  | 0.88     | 6.50e-05  | .419     | 3.61e-05 | 6.00e-03 | [-0.01, <0.01] |
| Cerebellar_Functional_Networks_17Networks_7  | 0.98     | 5.26e-05  | .515     | 4.49e-05 | 6.70e-03 | [-0.01, <0.01] |
| Cerebellar_Functional_Networks_17Networks_8  | 0.88     | 5.95e-05  | .462     | 3.65e-05 | 6.04e-03 | [-0.01, <0.01] |
| Cerebellar_Functional_Networks_17Networks_9  | 0.76     | 5.17e-05  | .545     | 2.72e-05 | 5.22e-03 | [-0.01, <0.01] |
| Cerebellar_Functional_Networks_7Networks_1   | 1.03     | 8.42e-05  | .332     | 4.99e-05 | 7.06e-03 | [-0.01, <0.01] |
| Cerebellar_Functional_Networks_7Networks_2   | 0.68     | 3.54e-05  | .611     | 2.14e-05 | 4.62e-03 | [-0.01, <0.01] |
| Cerebellar_Functional_Networks_7Networks_3   | 0.65     | 4.64e-05  | .568     | 1.98e-05 | 4.45e-03 | [-0.01, <0.01] |
| Cerebellar_Functional_Networks_7Networks_4   | 1.07     | 6.09e-05  | .389     | 5.40e-05 | 7.35e-03 | [-0.01, <0.01] |
| Cerebellar_Functional_Networks_7Networks_5   | 0.74     | 5.30e-05  | .562     | 2.56e-05 | 5.06e-03 | [-0.01, <0.01] |
| Cerebellar_Functional_Networks_7Networks_6   | 1.06     | 7.41e-05  | .396     | 5.28e-05 | 7.27e-03 | [-0.01, <0.01] |
| Cerebellar_Functional_Networks_7Networks_7   | 0.21     | 1.55e-05  | .982     | 2.00e-06 | 1.41e-03 | [-0.01, <0.01] |

**Table S9**

***ET PRS Associations with gray matter axial diffusivity (AD) - LeadDBS\_Atlas\_compendium***

| Tract                                             | <i>t</i> | $\beta$   | <i>p</i> | Eta2     | Cohens_f | 95% CI         |
|---------------------------------------------------|----------|-----------|----------|----------|----------|----------------|
| DBS_targets_ET_VIM_L                              | 0.12     | 8.46e-06  | .991     | 7.21e-07 | 8.49e-04 | [-0.01, <0.01] |
| DBS_targets_ET_VIM_R                              | 0.08     | 5.18e-06  | 1.00     | 2.64e-07 | 5.14e-04 | [-0.01, <0.01] |
| Essential_Tremor_Hypointensity_Coldspot_L         | -0.44    | -3.33e-05 | .810     | 8.93e-06 | 2.99e-03 | [-0.01, <0.01] |
| Essential_Tremor_Hypointensity_Coldspot_R         | -0.45    | -3.70e-05 | .715     | 9.63e-06 | 3.10e-03 | [-0.01, <0.01] |
| Essential_Tremor_Hypointensity_gm_mask            | -0.29    | -1.67e-05 | .852     | 3.84e-06 | 1.96e-03 | [-0.01, <0.01] |
| Essential_Tremor_Hypointensity_GPe_L              | -0.13    | -7.76e-06 | .988     | 7.72e-07 | 8.79e-04 | [-0.01, <0.01] |
| Essential_Tremor_Hypointensity_GPe_R              | -0.15    | -8.86e-06 | .972     | 1.00e-06 | 1.00e-03 | [-0.01, <0.01] |
| Essential_Tremor_Hypointensity_GPi_L              | 0.03     | 2.27e-06  | 1.00     | 5.07e-08 | 2.25e-04 | [-0.01, <0.01] |
| Essential_Tremor_Hypointensity_GPi_R              | -0.86    | -6.02e-05 | .476     | 3.48e-05 | 5.90e-03 | [-0.01, <0.01] |
| Essential_Tremor_Hypointensity_Hotspot_L          | -0.29    | -1.93e-05 | .945     | 3.89e-06 | 1.97e-03 | [-0.01, <0.01] |
| Essential_Tremor_Hypointensity_Hotspot_R          | -0.10    | -6.90e-06 | 1.00     | 4.24e-07 | 6.51e-04 | [-0.01, <0.01] |
| Essential_Tremor_Hypointensity_Hypointensity_L    | -0.24    | -1.62e-05 | .894     | 2.64e-06 | 1.62e-03 | [-0.01, <0.01] |
| Essential_Tremor_Hypointensity_Hypointensity_R    | -0.28    | -1.68e-05 | 1.00     | 3.61e-06 | 1.90e-03 | [-0.01, <0.01] |
| Essential_Tremor_Hypointensity_RN_L               | -0.08    | -6.18e-06 | 1.00     | 3.11e-07 | 5.57e-04 | [-0.01, <0.01] |
| Essential_Tremor_Hypointensity_RN_R               | 0.06     | 4.33e-06  | 1.00     | 1.47e-07 | 3.83e-04 | [-0.01, <0.01] |
| Essential_Tremor_Hypointensity_STN_L              | -0.87    | -7.70e-05 | .530     | 3.53e-05 | 5.94e-03 | [-0.01, <0.01] |
| Essential_Tremor_Hypointensity_STN_R              | -1.04    | -9.53e-05 | .444     | 5.05e-05 | 7.11e-03 | [-0.01, <0.01] |
| Essential_Tremor_Hypointensity_VIM_L              | -0.34    | -2.00e-05 | .890     | 5.27e-06 | 2.30e-03 | [-0.01, <0.01] |
| Essential_Tremor_Hypointensity_VIM_R              | -0.16    | -9.23e-06 | .963     | 1.14e-06 | 1.07e-03 | [-0.01, <0.01] |
| Essential_Tremor_Probabilistic_Mapping_pGPe_L     | -0.13    | -7.76e-06 | .988     | 7.72e-07 | 8.79e-04 | [-0.01, <0.01] |
| Essential_Tremor_Probabilistic_Mapping_pGPe_R     | -0.15    | -8.86e-06 | .972     | 1.00e-06 | 1.00e-03 | [-0.01, <0.01] |
| Essential_Tremor_Probabilistic_Mapping_pGPi_L     | 0.03     | 2.27e-06  | 1.00     | 5.07e-08 | 2.25e-04 | [-0.01, <0.01] |
| Essential_Tremor_Probabilistic_Mapping_pGPi_R     | -0.86    | -6.02e-05 | .476     | 3.48e-05 | 5.90e-03 | [-0.01, <0.01] |
| Essential_Tremor_Probabilistic_Mapping_pMeanMap_L | -0.39    | -2.47e-05 | .856     | 6.95e-06 | 2.64e-03 | [-0.01, <0.01] |

Table S9

*ET PRS Associations with gray matter axial diffusivity (AD) - LeadDBS\_Atlas\_compendium*

| Tract                                                    | <i>t</i>    | $\beta$         | <i>p</i>    | Eta2            | Cohens_f        | 95% CI                    |
|----------------------------------------------------------|-------------|-----------------|-------------|-----------------|-----------------|---------------------------|
| Essential_Tremor_Probabilistic_Mapping_pMeanMap_R        | -0.48       | -3.19e-05       | .764        | 1.10e-05        | 3.31e-03        | [-0.01, <0.01]            |
| Essential_Tremor_Probabilistic_Mapping_pRN_L             | -0.08       | -6.18e-06       | 1.00        | 3.11e-07        | 5.57e-04        | [-0.01, <0.01]            |
| Essential_Tremor_Probabilistic_Mapping_pRN_R             | 0.06        | 4.33e-06        | 1.00        | 1.47e-07        | 3.83e-04        | [-0.01, <0.01]            |
| Essential_Tremor_Probabilistic_Mapping_pSignificantMap_L | -0.23       | -1.59e-05       | 1.00        | 2.41e-06        | 1.55e-03        | [-0.01, <0.01]            |
| Essential_Tremor_Probabilistic_Mapping_pSignificantMap_R | -0.10       | -7.51e-06       | 1.00        | 5.16e-07        | 7.19e-04        | [-0.01, <0.01]            |
| Essential_Tremor_Probabilistic_Mapping_pSTN_L            | -0.87       | -7.70e-05       | .530        | 3.53e-05        | 5.94e-03        | [-0.01, <0.01]            |
| Essential_Tremor_Probabilistic_Mapping_pSTN_R            | -1.04       | -9.53e-05       | .444        | 5.05e-05        | 7.11e-03        | [-0.01, <0.01]            |
| Essential_Tremor_Probabilistic_Mapping_pVIM_L            | -0.34       | -2.00e-05       | .890        | 5.27e-06        | 2.30e-03        | [-0.01, <0.01]            |
| Essential_Tremor_Probabilistic_Mapping_pVIM_R            | -0.16       | -9.23e-06       | .963        | 1.14e-06        | 1.07e-03        | [-0.01, <0.01]            |
| left_amygdala                                            | 0.36        | 1.88e-05        | .791        | 6.08e-06        | 2.46e-03        | [-0.01, <0.01]            |
| left_caudate                                             | 1.29        | 1.13e-04        | .215        | 7.84e-05        | 8.85e-03        | [-0.01, <0.01]            |
| left_globus_pallidus_externa                             | -0.08       | -4.74e-06       | 1.00        | 2.83e-07        | 5.32e-04        | [-0.01, <0.01]            |
| left_globus_pallidus_interna                             | 0.16        | 1.15e-05        | 1.00        | 1.27e-06        | 1.13e-03        | [-0.01, <0.01]            |
| <b>left_hippocampus</b>                                  | <b>2.14</b> | <b>1.35e-04</b> | <b>.044</b> | <b>2.15e-04</b> | <b>1.47e-02</b> | <b>&lt;0.01, &lt;0.01</b> |
| left_nucleus_accumbens                                   | -0.24       | -1.83e-05       | 1.00        | 2.70e-06        | 1.64e-03        | [-0.01, <0.01]            |
| left_putamen                                             | 1.04        | 5.19e-05        | .366        | 5.04e-05        | 7.10e-03        | [-0.01, <0.01]            |
| left_red_nucleus                                         | -0.05       | -4.27e-06       | 1.00        | 1.40e-07        | 3.74e-04        | [-0.01, <0.01]            |
| left_substantia_nigra                                    | -0.07       | -6.45e-06       | 1.00        | 2.45e-07        | 4.95e-04        | [-0.01, <0.01]            |
| left_subthalamic_nucleus                                 | -0.93       | -8.60e-05       | .551        | 4.08e-05        | 6.39e-03        | [-0.01, <0.01]            |
| left_thalamus                                            | 1.35        | 7.97e-05        | .242        | 8.59e-05        | 9.27e-03        | [-0.01, <0.01]            |
| right_amygdala                                           | 0.05        | 2.83e-06        | 1.00        | 1.34e-07        | 3.66e-04        | [-0.01, <0.01]            |
| right_caudate                                            | 0.91        | 9.33e-05        | .397        | 3.92e-05        | 6.26e-03        | [-0.01, <0.01]            |

**Table S9**

***ET PRS Associations with gray matter axial diffusivity (AD) - LeadDBS\_Atlas\_compendium***

| Tract                                         | <i>t</i> | $\beta$   | <i>p</i> | Eta2     | Cohens_f | 95% CI         |
|-----------------------------------------------|----------|-----------|----------|----------|----------|----------------|
| right_globus_pallidus_externa                 | -0.10    | -6.24e-06 | 1.00     | 4.87e-07 | 6.98e-04 | [-0.01, <0.01] |
| right_globus_pallidus_Interna                 | -0.87    | -5.88e-05 | .468     | 3.56e-05 | 5.97e-03 | [-0.01, <0.01] |
| right_hippocampus                             | 1.09     | 6.59e-05  | .338     | 5.54e-05 | 7.45e-03 | [-0.01, <0.01] |
| right_nucleus_accumbens                       | -0.27    | -1.98e-05 | .964     | 3.37e-06 | 1.84e-03 | [-0.01, <0.01] |
| right_putamen                                 | 0.81     | 4.10e-05  | .514     | 3.04e-05 | 5.51e-03 | [-0.01, <0.01] |
| right_red_nucleus                             | 0.14     | 1.08e-05  | .980     | 8.85e-07 | 9.41e-04 | [-0.01, <0.01] |
| right_substantia_nigra                        | -1.05    | -8.94e-05 | .407     | 5.12e-05 | 7.16e-03 | [-0.01, <0.01] |
| right_subthalamic_nucleus                     | -1.05    | -1.00e-04 | .458     | 5.21e-05 | 7.22e-03 | [-0.01, <0.01] |
| right_thalamus                                | 0.79     | 4.77e-05  | .472     | 2.94e-05 | 5.42e-03 | [-0.01, <0.01] |
| SN1_LH                                        | 0.09     | 9.85e-06  | 1.00     | 3.91e-07 | 6.26e-04 | [-0.01, <0.01] |
| SN1_RH                                        | -1.28    | -1.30e-04 | .247     | 7.62e-05 | 8.73e-03 | [-0.01, <0.01] |
| SN2_LH                                        | -0.29    | -2.63e-05 | .847     | 4.01e-06 | 2.00e-03 | [-0.01, <0.01] |
| SN2_RH                                        | -1.60    | -1.46e-04 | .171     | 1.21e-04 | 1.10e-02 | [-0.01, <0.01] |
| SN3_LH                                        | -0.68    | -5.95e-05 | .606     | 2.17e-05 | 4.66e-03 | [-0.01, <0.01] |
| SN3_RH                                        | -1.68    | -1.51e-04 | .146     | 1.32e-04 | 1.15e-02 | [-0.01, <0.01] |
| T1_LH                                         | 0.34     | 1.73e-05  | .807     | 5.42e-06 | 2.33e-03 | [-0.01, <0.01] |
| T1_RH                                         | 1.01     | 5.26e-05  | .492     | 4.77e-05 | 6.91e-03 | [-0.01, <0.01] |
| T2_LH                                         | 0.94     | 5.64e-05  | .474     | 4.15e-05 | 6.45e-03 | [-0.01, <0.01] |
| T2_RH                                         | 0.60     | 3.59e-05  | .632     | 1.69e-05 | 4.11e-03 | [-0.01, <0.01] |
| T3_LH                                         | 0.92     | 4.95e-05  | .504     | 3.93e-05 | 6.27e-03 | [-0.01, <0.01] |
| T3_RH                                         | 0.45     | 2.39e-05  | .898     | 9.47e-06 | 3.08e-03 | [-0.01, <0.01] |
| talairach_label_GM_Hypothalamus               | 1.30     | 2.01e-04  | .267     | 7.90e-05 | 8.89e-03 | [-0.01, <0.01] |
| talairach_label_Left_Sublobar_GMHypothalamus  | 0.95     | 9.06e-05  | .468     | 4.26e-05 | 6.53e-03 | [-0.01, <0.01] |
| talairach_label_Right_Sublobar_GMHypothalamus | 0.37     | 3.51e-05  | .873     | 6.29e-06 | 2.51e-03 | [-0.01, <0.01] |

*Note*



**Table S9*****ET PRS Associations with gray matter axial diffusivity (AD) - LeadDBS\_Atlas\_compendium***

| Tract | <i>t</i> | $\beta$ | <i>p</i> | Eta2 | Cohens_f | 95% CI |
|-------|----------|---------|----------|------|----------|--------|
|-------|----------|---------|----------|------|----------|--------|

\* *p* < .05, \*\* *p* < .01, \*\*\* *p* < .001, 95% CI(B)**Table S10*****ET PRS Associations with grey matter fractional anisotropy (FA) - LeadDBS\_Atlas\_compendium\_extendedTable***

| Tract                                                                         | <i>t</i> | $\beta$   | <i>p</i> | Eta2     | Cohens_f | 95% CI        |
|-------------------------------------------------------------------------------|----------|-----------|----------|----------|----------|---------------|
| Atlas_of_the_Human_Hypothalamus_anterior_commissure_L                         | 0.33     | 2.24e-03  | .815     | 5.13e-06 | 2.26e-03 | [-0.01, 0.02] |
| Atlas_of_the_Human_Hypothalamus_anterior_commissure_R                         | 0.95     | 6.44e-03  | .467     | 4.27e-05 | 6.53e-03 | [-0.01, 0.02] |
| Atlas_of_the_Human_Hypothalamus_anterior_hypothalamic_area_L                  | 1.20     | 7.89e-03  | .254     | 6.74e-05 | 8.21e-03 | [-0.01, 0.02] |
| Atlas_of_the_Human_Hypothalamus_anterior_hypothalamic_area_R                  | 1.27     | 8.35e-03  | .249     | 7.58e-05 | 8.71e-03 | [-0.01, 0.02] |
| Atlas_of_the_Human_Hypothalamus_arcuate_hypothalamic_nucleus_L                | 0.88     | 5.82e-03  | .464     | 3.62e-05 | 6.02e-03 | [-0.01, 0.02] |
| Atlas_of_the_Human_Hypothalamus_arcuate_hypothalamic_nucleus_R                | 0.43     | 2.83e-03  | .734     | 8.64e-06 | 2.94e-03 | [-0.01, 0.02] |
| Atlas_of_the_Human_Hypothalamus_bed_nucleus_of_the_stria_terminalis_L         | -1.13    | -7.13e-03 | .354     | 6.00e-05 | 7.75e-03 | [-0.02, 0.01] |
| Atlas_of_the_Human_Hypothalamus_bed_nucleus_of_the_stria_terminalis_R         | 0.26     | 1.67e-03  | .870     | 3.28e-06 | 1.81e-03 | [-0.01, 0.01] |
| Atlas_of_the_Human_Hypothalamus_diagonal_band_of_Broca_L                      | 0.07     | 4.56e-04  | 1.00     | 2.45e-07 | 4.95e-04 | [-0.01, 0.01] |
| Atlas_of_the_Human_Hypothalamus_diagonal_band_of_Broca_R                      | 0.07     | 4.51e-04  | 1.00     | 2.45e-07 | 4.95e-04 | [-0.01, 0.01] |
| Atlas_of_the_Human_Hypothalamus_dorsal_periventricular_hypothalamic_nucleus_L | 0.30     | 1.90e-03  | .840     | 4.25e-06 | 2.06e-03 | [-0.01, 0.01] |

**Table S10**

***ET PRS Associations with grey matter fractional anisotropy (FA) - LeadDBS\_Atlas\_compendium\_extendedTable***

| Tract                                                                         | <i>t</i> | $\beta$   | <i>p</i> | Eta2     | Cohens_f | 95% CI        |
|-------------------------------------------------------------------------------|----------|-----------|----------|----------|----------|---------------|
| Atlas_of_the_Human_Hypothalamus_dorsal_periventricular_hypothalamic_nucleus_R | 0.71     | 4.54e-03  | .525     | 2.37e-05 | 4.87e-03 | [-0.01, 0.02] |
| Atlas_of_the_Human_Hypothalamus_dorsomedial_hypothalamic_nucleus_L            | 0.52     | 3.46e-03  | .666     | 1.25e-05 | 3.54e-03 | [-0.01, 0.02] |
| Atlas_of_the_Human_Hypothalamus_dorsomedial_hypothalamic_nucleus_R            | 1.01     | 6.78e-03  | .428     | 4.80e-05 | 6.93e-03 | [-0.01, 0.02] |
| Atlas_of_the_Human_Hypothalamus_fornix_L                                      | -0.97    | -5.98e-03 | .406     | 4.40e-05 | 6.63e-03 | [-0.02, 0.01] |
| Atlas_of_the_Human_Hypothalamus_fornix_R                                      | 0.21     | 1.31e-03  | 1.00     | 2.06e-06 | 1.44e-03 | [-0.01, 0.01] |
| Atlas_of_the_Human_Hypothalamus_gm_mask                                       | 0.41     | 2.76e-03  | .834     | 7.86e-06 | 2.80e-03 | [-0.01, 0.02] |
| Atlas_of_the_Human_Hypothalamus_inferior_thalamic_nucle_L                     | -0.28    | -1.91e-03 | .855     | 3.75e-06 | 1.94e-03 | [-0.02, 0.01] |
| Atlas_of_the_Human_Hypothalamus_inferior_thalamic_nucle_R                     | 0.32     | 2.17e-03  | .912     | 4.91e-06 | 2.22e-03 | [-0.01, 0.02] |
| Atlas_of_the_Human_Hypothalamus_lateral_hypothalamus_L                        | -0.85    | -5.65e-03 | .597     | 3.37e-05 | 5.81e-03 | [-0.02, 0.01] |
| Atlas_of_the_Human_Hypothalamus_lateral_hypothalamus_R                        | 0.03     | 2.25e-04  | 1.00     | 5.34e-08 | 2.31e-04 | [-0.01, 0.01] |
| Atlas_of_the_Human_Hypothalamus_mammillary_bodies_L                           | -0.19    | -1.20e-03 | .935     | 1.68e-06 | 1.30e-03 | [-0.01, 0.01] |
| Atlas_of_the_Human_Hypothalamus_mammillary_bodies_R                           | 1.01     | 6.38e-03  | .493     | 4.75e-05 | 6.89e-03 | [-0.01, 0.02] |
| Atlas_of_the_Human_Hypothalamus_mammillothalamic_tract_L                      | 0.58     | 3.83e-03  | .690     | 1.56e-05 | 3.95e-03 | [-0.01, 0.02] |
| Atlas_of_the_Human_Hypothalamus_mammillothalamic_tract_R                      | 1.64     | 1.10e-02  | .186     | 1.26e-04 | 1.12e-02 | [-0.01, 0.02] |
| Atlas_of_the_Human_Hypothalamus_medial_preoptic_nucleus_L                     | -0.06    | -4.01e-04 | 1.00     | 1.86e-07 | 4.31e-04 | [-0.01, 0.01] |

**Table S10**

***ET PRS Associations with grey matter fractional anisotropy (FA) - LeadDBS\_Atlas\_compendium\_extendedTable***

| Tract                                                                  | <i>t</i>    | $\beta$         | <i>p</i>    | Eta2            | Cohens_f        | 95% CI                 |
|------------------------------------------------------------------------|-------------|-----------------|-------------|-----------------|-----------------|------------------------|
| Atlas_of_the_Human_Hypothalamus_medial_preoptic_nucleus_R              | -0.01       | -7.88e-05       | 1.00        | 7.27e-09        | 8.53e-05        | [-0.01, 0.01]          |
| Atlas_of_the_Human_Hypothalamus_nucleus_basalis_of_Meynert_L           | 1.11        | 7.55e-03        | .368        | 5.75e-05        | 7.58e-03        | [-0.01, 0.02]          |
| Atlas_of_the_Human_Hypothalamus_nucleus_basalis_of_Meynert_R           | 1.19        | 8.09e-03        | .365        | 6.69e-05        | 8.18e-03        | [-0.01, 0.02]          |
| Atlas_of_the_Human_Hypothalamus_paraventricular_nucleus_L              | 0.44        | 2.81e-03        | .846        | 8.93e-06        | 2.99e-03        | [-0.01, 0.02]          |
| Atlas_of_the_Human_Hypothalamus_paraventricular_nucleus_R              | -0.04       | -2.50e-04       | 1.00        | 7.16e-08        | 2.68e-04        | [-0.01, 0.01]          |
| Atlas_of_the_Human_Hypothalamus_periventricular_hypothalamic_nucleus_L | 0.93        | 6.17e-03        | .390        | 4.02e-05        | 6.34e-03        | [-0.01, 0.02]          |
| Atlas_of_the_Human_Hypothalamus_periventricular_hypothalamic_nucleus_R | 0.50        | 3.29e-03        | .680        | 1.16e-05        | 3.41e-03        | [-0.01, 0.02]          |
| Atlas_of_the_Human_Hypothalamus_posterior_hypothalamic_nucleus_L       | 0.49        | 3.29e-03        | .722        | 1.13e-05        | 3.36e-03        | [-0.01, 0.02]          |
| Atlas_of_the_Human_Hypothalamus_posterior_hypothalamic_nucleus_R       | 1.16        | 7.69e-03        | .341        | 6.25e-05        | 7.91e-03        | [-0.01, 0.02]          |
| <b>Atlas_of_the_Human_Hypothalamus_red_nucleus_L</b>                   | <b>2.59</b> | <b>1.74e-02</b> | <b>.021</b> | <b>3.13e-04</b> | <b>1.77e-02</b> | <b>&lt;0.01, 0.03]</b> |
| <b>Atlas_of_the_Human_Hypothalamus_red_nucleus_R</b>                   | <b>3.13</b> | <b>2.09e-02</b> | <b>.004</b> | <b>4.58e-04</b> | <b>2.14e-02</b> | <b>[0.01, 0.03]</b>    |
| Atlas_of_the_Human_Hypothalamus_substantia_nigra_L                     | -0.54       | -3.68e-03       | .745        | 1.37e-05        | 3.70e-03        | [-0.02, 0.01]          |
| Atlas_of_the_Human_Hypothalamus_substantia_nigra_R                     | -0.31       | -2.10e-03       | 1.00        | 4.55e-06        | 2.13e-03        | [-0.02, 0.01]          |
| Atlas_of_the_Human_Hypothalamus_subthalamic_nucleus_L                  | 0.02        | 1.46e-04        | 1.00        | 2.17e-08        | 1.47e-04        | [-0.01, 0.01]          |
| Atlas_of_the_Human_Hypothalamus_subthalamic_nucleus_R                  | -0.34       | -2.27e-03       | .810        | 5.33e-06        | 2.31e-03        | [-0.02, 0.01]          |

**Table S10*****ET PRS Associations with grey matter fractional anisotropy (FA) - LeadDBS\_Atlas\_compendium\_extendedTable***

| Tract                                                                   | <i>t</i> | $\beta$   | <i>p</i> | Eta2     | Cohens_f | 95% CI        |
|-------------------------------------------------------------------------|----------|-----------|----------|----------|----------|---------------|
| Atlas_of_the_Human_Hypothalamus_suprachiasmatic_hypothalamic_nucleus_L  | 0.93     | 6.16e-03  | .431     | 4.04e-05 | 6.36e-03 | [-0.01, 0.02] |
| Atlas_of_the_Human_Hypothalamus_suprachiasmatic_hypothalamic_nucleus_R  | 0.31     | 2.08e-03  | .829     | 4.61e-06 | 2.15e-03 | [-0.01, 0.02] |
| Atlas_of_the_Human_Hypothalamus_supraoptic_hypothalamic_nucleus_L       | 1.33     | 8.71e-03  | .225     | 8.27e-05 | 9.09e-03 | [-0.01, 0.02] |
| Atlas_of_the_Human_Hypothalamus_supraoptic_hypothalamic_nucleus_R       | 0.15     | 9.53e-04  | .996     | 1.00e-06 | 1.00e-03 | [-0.01, 0.01] |
| Atlas_of_the_Human_Hypothalamus_tuberomammillary_hypothalamic_nucleus_L | 0.52     | 3.35e-03  | .740     | 1.25e-05 | 3.54e-03 | [-0.01, 0.02] |
| Atlas_of_the_Human_Hypothalamus_tuberomammillary_hypothalamic_nucleus_R | 0.69     | 4.45e-03  | .676     | 2.22e-05 | 4.71e-03 | [-0.01, 0.02] |
| Atlas_of_the_Human_Hypothalamus_ventromedial_hypothalamic_nucleus_L     | 1.19     | 7.90e-03  | .369     | 6.62e-05 | 8.13e-03 | [-0.01, 0.02] |
| Atlas_of_the_Human_Hypothalamus_ventromedial_hypothalamic_nucleus_R     | 1.64     | 1.09e-02  | .124     | 1.26e-04 | 1.12e-02 | [-0.01, 0.02] |
| Atlas_of_the_Human_Hypothalamus_zona_incerta_L                          | 0.72     | 4.90e-03  | .865     | 2.43e-05 | 4.93e-03 | [-0.01, 0.02] |
| Atlas_of_the_Human_Hypothalamus_zona_incerta_R                          | 0.36     | 2.45e-03  | .973     | 6.17e-06 | 2.48e-03 | [-0.01, 0.02] |
| Brainstem_Connectome_Atlas_CST_L                                        | 0.05     | 3.57e-04  | 1.00     | 1.30e-07 | 3.61e-04 | [-0.01, 0.01] |
| Brainstem_Connectome_Atlas_CST_R                                        | 0.20     | 1.36e-03  | .926     | 1.87e-06 | 1.37e-03 | [-0.01, 0.01] |
| Brainstem_Connectome_Atlas_FPT_L                                        | -0.52    | -3.50e-03 | .832     | 1.25e-05 | 3.54e-03 | [-0.02, 0.01] |
| Brainstem_Connectome_Atlas_FPT_R                                        | -0.60    | -4.04e-03 | .865     | 1.66e-05 | 4.08e-03 | [-0.02, 0.01] |
| Brainstem_Connectome_Atlas_gm_mask                                      | 0.83     | 5.57e-03  | .449     | 3.20e-05 | 5.66e-03 | [-0.01, 0.02] |
| Brainstem_Connectome_Atlas_ICPMC_L                                      | 0.68     | 4.41e-03  | .548     | 2.15e-05 | 4.64e-03 | [-0.01, 0.02] |

**Table S10**

***ET PRS Associations with grey matter fractional anisotropy (FA) - LeadDBS\_Atlas\_compendium\_extendedTable***

| Tract                              | <i>t</i> | $\beta$   | <i>p</i> | Eta2     | Cohens_f | 95% CI        |
|------------------------------------|----------|-----------|----------|----------|----------|---------------|
| Brainstem_Connectome_Atlas_ICPMC_R | 0.57     | 3.76e-03  | .623     | 1.54e-05 | 3.92e-03 | [-0.01, 0.02] |
| Brainstem_Connectome_Atlas_ICPVC_L | 0.45     | 2.91e-03  | .718     | 9.52e-06 | 3.09e-03 | [-0.01, 0.02] |
| Brainstem_Connectome_Atlas_ICPVC_R | 0.52     | 3.42e-03  | .663     | 1.27e-05 | 3.57e-03 | [-0.01, 0.02] |
| Brainstem_Connectome_Atlas_LL_L    | 0.51     | 3.35e-03  | .673     | 1.21e-05 | 3.47e-03 | [-0.01, 0.02] |
| Brainstem_Connectome_Atlas_LL_R    | 1.01     | 6.77e-03  | .433     | 4.74e-05 | 6.89e-03 | [-0.01, 0.02] |
| Brainstem_Connectome_Atlas_MCP_M   | 0.34     | 2.24e-03  | .810     | 5.30e-06 | 2.30e-03 | [-0.01, 0.02] |
| Brainstem_Connectome_Atlas_ML_L    | 0.85     | 5.73e-03  | .433     | 3.42e-05 | 5.85e-03 | [-0.01, 0.02] |
| Brainstem_Connectome_Atlas_ML_R    | 1.11     | 7.39e-03  | .328     | 5.74e-05 | 7.57e-03 | [-0.01, 0.02] |
| Brainstem_Connectome_Atlas_POTPT_L | 0.20     | 1.38e-03  | .922     | 1.96e-06 | 1.40e-03 | [-0.01, 0.01] |
| Brainstem_Connectome_Atlas_POTPT_R | 0.39     | 2.64e-03  | .798     | 7.10e-06 | 2.66e-03 | [-0.01, 0.02] |
| Brainstem_Connectome_Atlas_SCPCR_L | 0.86     | 5.72e-03  | .428     | 3.48e-05 | 5.90e-03 | [-0.01, 0.02] |
| Brainstem_Connectome_Atlas_SCPCR_R | 0.41     | 2.69e-03  | .837     | 7.73e-06 | 2.78e-03 | [-0.01, 0.02] |
| Brainstem_Connectome_Atlas_SCPCT_L | 0.84     | 5.59e-03  | .439     | 3.33e-05 | 5.77e-03 | [-0.01, 0.02] |
| Brainstem_Connectome_Atlas_SCPCT_R | 0.49     | 3.24e-03  | .765     | 1.11e-05 | 3.34e-03 | [-0.01, 0.02] |
| Brainstem_Connectome_Atlas_SCPSC_L | 0.63     | 4.15e-03  | .581     | 1.86e-05 | 4.32e-03 | [-0.01, 0.02] |
| Brainstem_Connectome_Atlas_SCPSC_R | 1.04     | 6.93e-03  | .365     | 5.07e-05 | 7.12e-03 | [-0.01, 0.02] |
| Brainstem_Connectome_Atlas_STT_L   | 0.79     | 5.22e-03  | .474     | 2.91e-05 | 5.40e-03 | [-0.01, 0.02] |
| Brainstem_Connectome_Atlas_STT_R   | 0.98     | 6.56e-03  | .398     | 4.52e-05 | 6.73e-03 | [-0.01, 0.02] |
| DBS_targets_AD_FORNIX_L            | -1.01    | -6.42e-03 | .380     | 4.81e-05 | 6.94e-03 | [-0.02, 0.01] |
| DBS_targets_AD_FORNIX_R            | 0.43     | 2.72e-03  | .736     | 8.54e-06 | 2.92e-03 | [-0.01, 0.02] |
| DBS_targets_ADD_NAc_L              | 1.55     | 1.02e-02  | .149     | 1.12e-04 | 1.06e-02 | [-0.01, 0.02] |
| DBS_targets_ADD_NAc_R              | 2.10     | 1.40e-02  | .096     | 2.08e-04 | 1.44e-02 | [<0.01, 0.03] |
| DBS_targets_Dyt_GPi_L              | 0.62     | 4.17e-03  | .966     | 1.81e-05 | 4.25e-03 | [-0.01, 0.02] |
| DBS_targets_Dyt_GPi_R              | -0.82    | -5.50e-03 | .645     | 3.17e-05 | 5.63e-03 | [-0.02, 0.01] |

**Table S10**

***ET PRS Associations with grey matter fractional anisotropy (FA) - LeadDBS\_Atlas\_compendium\_extendedTable***

| Tract                                    | <i>t</i> | $\beta$   | <i>p</i> | Eta2     | Cohens_f | 95% CI         |
|------------------------------------------|----------|-----------|----------|----------|----------|----------------|
| DBS_targets_ET_VIM_L                     | 0.79     | 5.34e-03  | .525     | 2.96e-05 | 5.44e-03 | [-0.01, 0.02]  |
| DBS_targets_ET_VIM_R                     | 0.54     | 3.60e-03  | .694     | 1.36e-05 | 3.68e-03 | [-0.01, 0.02]  |
| DBS_targets_MD_SCC_L                     | -0.23    | -1.54e-03 | .964     | 2.56e-06 | 1.60e-03 | [-0.01, 0.01]  |
| DBS_targets_MD_SCC_R                     | -0.99    | -6.48e-03 | .507     | 4.59e-05 | 6.77e-03 | [-0.02, 0.01]  |
| DBS_targets_OCD_ALIC_L                   | -0.27    | -1.80e-03 | .868     | 3.35e-06 | 1.83e-03 | [-0.02, 0.01]  |
| DBS_targets_OCD_ALIC_R                   | 0.29     | 1.93e-03  | .957     | 3.82e-06 | 1.95e-03 | [-0.01, 0.02]  |
| DBS_targets_OCD_NAc_L                    | -0.35    | -2.24e-03 | .802     | 5.61e-06 | 2.37e-03 | [-0.01, 0.01]  |
| DBS_targets_OCD_NAc_R                    | 0.40     | 2.58e-03  | .846     | 7.36e-06 | 2.71e-03 | [-0.01, 0.02]  |
| DBS_targets_PD_STN_L                     | 1.37     | 9.32e-03  | .374     | 8.82e-05 | 9.39e-03 | [-0.01, 0.02]  |
| DBS_targets_PD_STN_R                     | 0.09     | 6.15e-04  | 1.00     | 3.90e-07 | 6.24e-04 | [-0.01, 0.01]  |
| DBS_targets_TS_CMPVVOI_L                 | 1.84     | 1.23e-02  | .144     | 1.59e-04 | 1.26e-02 | [-0.01, 0.03]  |
| DBS_targets_TS_CMPVVOI_R                 | 1.41     | 9.51e-03  | .290     | 9.33e-05 | 9.66e-03 | [-0.01, 0.02]  |
| DBS_Tractography_Atlas_Ca                | -1.20    | -7.72e-03 | .254     | 6.73e-05 | 8.21e-03 | [-0.02, <0.01] |
| DBS_Tractography_Atlas_EXA               | -0.09    | -5.72e-04 | 1.00     | 3.62e-07 | 6.02e-04 | [-0.01, 0.01]  |
| DBS_Tractography_Atlas_HN                | 0.35     | 2.31e-03  | .802     | 5.62e-06 | 2.37e-03 | [-0.01, 0.02]  |
| DBS_Tractography_Atlas_HTH               | 0.28     | 1.84e-03  | .857     | 3.68e-06 | 1.92e-03 | [-0.01, 0.01]  |
| DBS_Tractography_Atlas_L_STN_associative | 0.71     | 4.83e-03  | .692     | 2.38e-05 | 4.88e-03 | [-0.01, 0.02]  |
| DBS_Tractography_Atlas_L_STN_limbic      | -0.32    | -2.18e-03 | 1.00     | 4.84e-06 | 2.20e-03 | [-0.02, 0.01]  |
| DBS_Tractography_Atlas_L_STN_motor       | 0.92     | 6.23e-03  | .560     | 3.99e-05 | 6.31e-03 | [-0.01, 0.02]  |
| DBS_Tractography_Atlas_MN                | 0.41     | 2.58e-03  | .751     | 7.82e-06 | 2.80e-03 | [-0.01, 0.01]  |
| DBS_Tractography_Atlas_NAC               | 0.73     | 4.60e-03  | .511     | 2.51e-05 | 5.01e-03 | [-0.01, 0.02]  |
| DBS_Tractography_Atlas_PBP               | 1.26     | 8.47e-03  | .329     | 7.39e-05 | 8.60e-03 | [-0.01, 0.02]  |
| DBS_Tractography_Atlas_Pu                | 0.68     | 4.46e-03  | .610     | 2.14e-05 | 4.63e-03 | [-0.01, 0.02]  |

**Table S10**

***ET PRS Associations with grey matter fractional anisotropy (FA) - LeadDBS\_Atlas\_compendium\_extendedTable***

| Tract                                                                             | <i>t</i> | $\beta$   | <i>p</i> | Eta2     | Cohens_f | 95% CI        |
|-----------------------------------------------------------------------------------|----------|-----------|----------|----------|----------|---------------|
| DBS_Tractography_Atlas_R_STN_associative                                          | 0.02     | 1.39e-04  | 1.00     | 1.98e-08 | 1.41e-04 | [-0.01, 0.01] |
| DBS_Tractography_Atlas_R_STN_limbic                                               | -0.69    | -4.65e-03 | .670     | 2.26e-05 | 4.75e-03 | [-0.02, 0.01] |
| DBS_Tractography_Atlas_R_STN_motor                                                | -0.15    | -9.99e-04 | .970     | 1.04e-06 | 1.02e-03 | [-0.01, 0.01] |
| DBS_Tractography_Atlas_SNc                                                        | 0.15     | 1.01e-03  | .968     | 1.06e-06 | 1.03e-03 | [-0.01, 0.01] |
| DBS_Tractography_Atlas_SNr                                                        | -0.53    | -3.61e-03 | .789     | 1.33e-05 | 3.65e-03 | [-0.02, 0.01] |
| DBS_Tractography_Atlas_VeP                                                        | 0.61     | 4.11e-03  | .661     | 1.75e-05 | 4.19e-03 | [-0.01, 0.02] |
| DBS_Tractography_Atlas_VTA                                                        | 0.35     | 2.40e-03  | .996     | 5.84e-06 | 2.42e-03 | [-0.01, 0.02] |
| Dystonia_Response_Tract_Atlas_Sweetspot_cervical_L                                | 0.16     | 1.05e-03  | .991     | 1.15e-06 | 1.07e-03 | [-0.01, 0.01] |
| Dystonia_Response_Tract_Atlas_Sweetspot_cervical_R                                | -0.46    | -3.09e-03 | .710     | 9.93e-06 | 3.15e-03 | [-0.02, 0.01] |
| Dystonia_Response_Tract_Atlas_Sweetspot_generalized_L                             | 0.53     | 3.58e-03  | .726     | 1.33e-05 | 3.65e-03 | [-0.01, 0.02] |
| Dystonia_Response_Tract_Atlas_Sweetspot_generalized_R                             | -0.45    | -3.01e-03 | .719     | 9.43e-06 | 3.07e-03 | [-0.02, 0.01] |
| Nigral_O'Donnell Research Group<br>(ORG)anization_atlas_lateral_SNc_somatomotor_L | -0.04    | -2.95e-04 | 1.00     | 8.97e-08 | 3.00e-04 | [-0.01, 0.01] |
| Nigral_O'Donnell Research Group<br>(ORG)anization_atlas_lateral_SNc_somatomotor_R | 0.07     | 4.93e-04  | 1.00     | 2.55e-07 | 5.05e-04 | [-0.01, 0.01] |
| Nigral_O'Donnell Research Group<br>(ORG)anization_atlas_medial_SNc_limbic_L       | -0.36    | -2.46e-03 | .787     | 6.21e-06 | 2.49e-03 | [-0.02, 0.01] |
| Nigral_O'Donnell Research Group<br>(ORG)anization_atlas_medial_SNc_limbic_R       | 0.04     | 2.78e-04  | 1.00     | 8.12e-08 | 2.85e-04 | [-0.01, 0.01] |
| Nigral_O'Donnell Research Group<br>(ORG)anization_atlas_ventral_SN_associative_L  | -0.83    | -5.60e-03 | .447     | 3.23e-05 | 5.68e-03 | [-0.02, 0.01] |
| Nigral_O'Donnell Research Group<br>(ORG)anization_atlas_ventral_SN_associative_R  | -0.43    | -2.91e-03 | .730     | 8.85e-06 | 2.97e-03 | [-0.02, 0.01] |
| Striatum_Functional_Networks_17Networks_1                                         | 1.06     | 7.17e-03  | .318     | 5.27e-05 | 7.26e-03 | [-0.01, 0.02] |

**Table S10**

***ET PRS Associations with grey matter fractional anisotropy (FA) - LeadDBS\_Atlas\_compendium\_extendedTable***

| Tract                                      | <i>t</i> | $\beta$   | <i>p</i> | Eta2     | Cohens_f | 95% CI        |
|--------------------------------------------|----------|-----------|----------|----------|----------|---------------|
| Striatal_Functional_Networks_17Networks_10 | 0.60     | 3.84e-03  | .723     | 1.70e-05 | 4.12e-03 | [-0.01, 0.02] |
| Striatal_Functional_Networks_17Networks_12 | 0.67     | 4.49e-03  | .618     | 2.08e-05 | 4.56e-03 | [-0.01, 0.02] |
| Striatal_Functional_Networks_17Networks_13 | -1.10    | -7.22e-03 | .375     | 5.64e-05 | 7.51e-03 | [-0.02, 0.01] |
| Striatal_Functional_Networks_17Networks_14 | -0.39    | -2.62e-03 | 1.00     | 7.13e-06 | 2.67e-03 | [-0.02, 0.01] |
| Striatal_Functional_Networks_17Networks_16 | -0.82    | -5.19e-03 | .565     | 3.17e-05 | 5.63e-03 | [-0.02, 0.01] |
| Striatal_Functional_Networks_17Networks_17 | 0.71     | 4.60e-03  | .525     | 2.36e-05 | 4.86e-03 | [-0.01, 0.02] |
| Striatal_Functional_Networks_17Networks_3  | 0.24     | 1.63e-03  | .888     | 2.79e-06 | 1.67e-03 | [-0.01, 0.01] |
| Striatal_Functional_Networks_17Networks_4  | 0.30     | 1.95e-03  | .844     | 4.11e-06 | 2.03e-03 | [-0.01, 0.01] |
| Striatal_Functional_Networks_17Networks_6  | 0.60     | 3.90e-03  | .602     | 1.70e-05 | 4.12e-03 | [-0.01, 0.02] |
| Striatal_Functional_Networks_17Networks_7  | 0.34     | 2.25e-03  | .804     | 5.53e-06 | 2.35e-03 | [-0.01, 0.02] |
| Striatal_Functional_Networks_17Networks_8  | 0.08     | 5.14e-04  | 1.00     | 3.11e-07 | 5.57e-04 | [-0.01, 0.01] |
| Striatal_Functional_Networks_17Networks_9  | 0.85     | 5.73e-03  | .486     | 3.36e-05 | 5.79e-03 | [-0.01, 0.02] |
| Striatal_Functional_Networks_7Networks_1   | 1.06     | 7.17e-03  | .318     | 5.27e-05 | 7.26e-03 | [-0.01, 0.02] |
| Striatal_Functional_Networks_7Networks_2   | 0.28     | 1.84e-03  | .859     | 3.62e-06 | 1.90e-03 | [-0.01, 0.01] |
| Striatal_Functional_Networks_7Networks_3   | 0.76     | 5.16e-03  | .544     | 2.73e-05 | 5.23e-03 | [-0.01, 0.02] |
| Striatal_Functional_Networks_7Networks_4   | 0.44     | 2.82e-03  | .727     | 9.04e-06 | 3.01e-03 | [-0.01, 0.02] |
| Striatal_Functional_Networks_7Networks_5   | 0.60     | 3.85e-03  | .751     | 1.71e-05 | 4.13e-03 | [-0.01, 0.02] |
| Striatal_Functional_Networks_7Networks_6   | -0.52    | -3.31e-03 | .820     | 1.26e-05 | 3.55e-03 | [-0.02, 0.01] |
| Striatal_Functional_Networks_7Networks_7   | -0.51    | -3.21e-03 | .840     | 1.21e-05 | 3.48e-03 | [-0.02, 0.01] |
| Thalamic_Functional_Atlas_1_L              | 0.91     | 6.13e-03  | .444     | 3.88e-05 | 6.23e-03 | [-0.01, 0.02] |
| Thalamic_Functional_Atlas_1_R              | 0.91     | 6.13e-03  | .444     | 3.88e-05 | 6.23e-03 | [-0.01, 0.02] |
| Thalamic_Functional_Atlas_10_L             | 0.19     | 1.26e-03  | 1.00     | 1.69e-06 | 1.30e-03 | [-0.01, 0.01] |
| Thalamic_Functional_Atlas_10_R             | 0.55     | 3.66e-03  | .751     | 1.44e-05 | 3.80e-03 | [-0.01, 0.02] |
| Thalamic_Functional_Atlas_11_L             | -0.31    | -2.03e-03 | .835     | 4.42e-06 | 2.10e-03 | [-0.02, 0.01] |



**Table S10**

***ET PRS Associations with grey matter fractional anisotropy (FA) - LeadDBS\_Atlas\_compendium\_extendedTable***

| Tract                                | <i>t</i>     | $\beta$          | <i>p</i>    | Eta2            | Cohens_f        | 95% CI                |
|--------------------------------------|--------------|------------------|-------------|-----------------|-----------------|-----------------------|
| Thalamic_Functional_Atlas_11_R       | -0.67        | -4.44e-03        | .617        | 2.09e-05        | 4.57e-03        | [-0.02, 0.01]         |
| Thalamic_Functional_Atlas_12_L       | -0.33        | -1.96e-03        | .865        | 5.25e-06        | 2.29e-03        | [-0.01, 0.01]         |
| Thalamic_Functional_Atlas_12_R       | -0.13        | -7.40e-04        | .990        | 7.44e-07        | 8.62e-04        | [-0.01, 0.01]         |
| Thalamic_Functional_Atlas_13_R       | 0.91         | 6.16e-03         | .662        | 3.91e-05        | 6.25e-03        | [-0.01, 0.02]         |
| Thalamic_Functional_Atlas_13A_L      | -0.20        | -1.28e-03        | .926        | 1.87e-06        | 1.37e-03        | [-0.01, 0.01]         |
| Thalamic_Functional_Atlas_13B_L      | 1.10         | 7.41e-03         | .331        | 5.68e-05        | 7.53e-03        | [-0.01, 0.02]         |
| Thalamic_Functional_Atlas_14_L       | -1.84        | -1.15e-02        | .098        | 1.58e-04        | 1.26e-02        | [-0.02,<br><0.01]     |
| Thalamic_Functional_Atlas_14_R       | -1.35        | -8.48e-03        | .216        | 8.56e-05        | 9.25e-03        | [-0.02,<br><0.01]     |
| Thalamic_Functional_Atlas_15_L       | -0.32        | -2.15e-03        | .913        | 4.87e-06        | 2.21e-03        | [-0.02, 0.01]         |
| Thalamic_Functional_Atlas_15_R       | 0.34         | 2.19e-03         | .872        | 5.32e-06        | 2.31e-03        | [-0.01, 0.01]         |
| Thalamic_Functional_Atlas_2_L        | -0.15        | -9.96e-04        | .970        | 1.03e-06        | 1.01e-03        | [-0.01, 0.01]         |
| Thalamic_Functional_Atlas_2_R        | 0.76         | 5.09e-03         | .546        | 2.71e-05        | 5.21e-03        | [-0.01, 0.02]         |
| Thalamic_Functional_Atlas_3_R        | 0.12         | 7.90e-04         | 1.00        | 6.45e-07        | 8.03e-04        | [-0.01, 0.01]         |
| Thalamic_Functional_Atlas_4_R        | 0.26         | 1.78e-03         | .977        | 3.23e-06        | 1.80e-03        | [-0.01, 0.02]         |
| Thalamic_Functional_Atlas_4A_L       | 0.55         | 3.72e-03         | .639        | 1.43e-05        | 3.78e-03        | [-0.01, 0.02]         |
| Thalamic_Functional_Atlas_4B_L       | 0.14         | 9.40e-04         | 1.00        | 9.10e-07        | 9.54e-04        | [-0.01, 0.01]         |
| Thalamic_Functional_Atlas_5_R        | -0.94        | -6.21e-03        | .410        | 4.12e-05        | 6.42e-03        | [-0.02, 0.01]         |
| Thalamic_Functional_Atlas_6_L        | -0.80        | -5.17e-03        | .579        | 3.03e-05        | 5.51e-03        | [-0.02, 0.01]         |
| Thalamic_Functional_Atlas_6_R        | 0.98         | 6.45e-03         | .528        | 4.50e-05        | 6.71e-03        | [-0.01, 0.02]         |
| <b>Thalamic_Functional_Atlas_7_L</b> | <b>-2.06</b> | <b>-1.24e-02</b> | <b>.048</b> | <b>1.99e-04</b> | <b>1.41e-02</b> | <b>[-0.02, -0.01]</b> |
| Thalamic_Functional_Atlas_7_R        | -1.53        | -9.56e-03        | .153        | 1.10e-04        | 1.05e-02        | [-0.02,<br><0.01]     |

**Table S10**

***ET PRS Associations with grey matter fractional anisotropy (FA) - LeadDBS\_Atlas\_compendium\_extendedTable***

| Tract                               | <i>t</i> | $\beta$   | <i>p</i> | Eta2     | Cohens_f | 95% CI        |
|-------------------------------------|----------|-----------|----------|----------|----------|---------------|
| Thalamic_Functional_Atlas_8_L       | 0.55     | 3.67e-03  | .715     | 1.40e-05 | 3.74e-03 | [-0.01, 0.02] |
| Thalamic_Functional_Atlas_8_R       | 0.41     | 2.71e-03  | .754     | 7.71e-06 | 2.78e-03 | [-0.01, 0.02] |
| Thalamic_Functional_Atlas_9_R       | -0.31    | -2.03e-03 | .832     | 4.53e-06 | 2.13e-03 | [-0.01, 0.01] |
| Thalamic_Functional_Atlas_9A_L      | -0.31    | -1.99e-03 | .828     | 4.65e-06 | 2.16e-03 | [-0.01, 0.01] |
| Thalamic_Functional_Atlas_9B_L      | -0.30    | -1.99e-03 | .843     | 4.14e-06 | 2.04e-03 | [-0.02, 0.01] |
| TOR_PSM_dystonia_gpi_n64_coldspot_L | 0.08     | 5.05e-04  | 1.00     | 2.73e-07 | 5.23e-04 | [-0.01, 0.01] |
| TOR_PSM_dystonia_gpi_n64_coldspot_R | -0.15    | -9.81e-04 | .971     | 1.02e-06 | 1.01e-03 | [-0.01, 0.01] |
| TOR_PSM_dystonia_gpi_n64_hotspot_L  | 0.11     | 7.32e-04  | 1.00     | 5.54e-07 | 7.44e-04 | [-0.01, 0.01] |
| TOR_PSM_dystonia_gpi_n64_hotspot_R  | 0.20     | 1.35e-03  | 1.00     | 1.87e-06 | 1.37e-03 | [-0.01, 0.01] |
| TOR_PSM_pd_gpi_n28_coldspot_L       | -0.43    | -2.95e-03 | .762     | 8.85e-06 | 2.97e-03 | [-0.02, 0.01] |
| TOR_PSM_pd_gpi_n28_coldspot_R       | 0.16     | 1.04e-03  | .964     | 1.13e-06 | 1.06e-03 | [-0.01, 0.01] |
| TOR_PSM_pd_gpi_n28_hotspot_L        | 0.35     | 2.35e-03  | .800     | 5.72e-06 | 2.39e-03 | [-0.01, 0.02] |
| TOR_PSM_pd_gpi_n28_hotspot_R        | 0.01     | 9.56e-05  | 1.00     | 9.46e-09 | 9.72e-05 | [-0.01, 0.01] |
| TOR_PSM_pd_stn_n275_coldspot_L      | 0.36     | 2.38e-03  | 1.00     | 5.91e-06 | 2.43e-03 | [-0.01, 0.02] |
| TOR_PSM_pd_stn_n275_coldspot_R      | 1.39     | 9.33e-03  | .257     | 9.09e-05 | 9.53e-03 | [-0.01, 0.02] |
| TOR_PSM_pd_stn_n275_hotspot_L       | 0.60     | 4.07e-03  | .861     | 1.69e-05 | 4.11e-03 | [-0.01, 0.02] |
| TOR_PSM_pd_stn_n275_hotspot_R       | 0.10     | 6.78e-04  | 1.00     | 4.75e-07 | 6.89e-04 | [-0.01, 0.01] |
| TOR_PSM_psych_scc_n76_coldspot_L    | -0.74    | -4.97e-03 | .724     | 2.55e-05 | 5.05e-03 | [-0.02, 0.01] |
| TOR_PSM_psych_scc_n76_coldspot_R    | -0.23    | -1.52e-03 | .970     | 2.48e-06 | 1.57e-03 | [-0.01, 0.01] |
| TOR_PSM_psych_scc_n76_hotspot_L     | -0.35    | -2.30e-03 | .797     | 5.82e-06 | 2.41e-03 | [-0.02, 0.01] |
| TOR_PSM_psych_scc_n76_hotspot_R     | -0.47    | -3.08e-03 | .843     | 1.05e-05 | 3.25e-03 | [-0.02, 0.01] |
| TOR_PSM_tremor_vim_n39_coldspot_L   | 1.88     | 1.27e-02  | .134     | 1.65e-04 | 1.28e-02 | [-0.01, 0.03] |
| TOR_PSM_tremor_vim_n39_coldspot_R   | 1.50     | 1.01e-02  | .293     | 1.06e-04 | 1.03e-02 | [-0.01, 0.02] |
| TOR_PSM_tremor_vim_n39_hotspot_L    | 0.67     | 4.48e-03  | .553     | 2.10e-05 | 4.59e-03 | [-0.01, 0.02] |

**Table S10**

***ET PRS Associations with grey matter fractional anisotropy (FA) - LeadDBS\_Atlas\_compendium\_extendedTable***

| Tract                              | <i>t</i> | $\beta$   | <i>p</i> | Eta2     | Cohens_f | 95% CI        |
|------------------------------------|----------|-----------|----------|----------|----------|---------------|
| TOR_PSM_tremor_vim_n39_hotspot_R   | 1.12     | 7.56e-03  | .319     | 5.92e-05 | 7.70e-03 | [-0.01, 0.02] |
| TOR_signPD_axial_signs_coldspot_L  | 0.04     | 2.64e-04  | 1.00     | 7.27e-08 | 2.70e-04 | [-0.01, 0.01] |
| TOR_signPD_axial_signs_coldspot_R  | 0.97     | 6.49e-03  | .523     | 4.40e-05 | 6.63e-03 | [-0.01, 0.02] |
| TOR_signPD_axial_signs_hotspot_L   | 0.27     | 1.82e-03  | .960     | 3.38e-06 | 1.84e-03 | [-0.01, 0.02] |
| TOR_signPD_axial_signs_hotspot_R   | 0.31     | 2.11e-03  | .921     | 4.61e-06 | 2.15e-03 | [-0.01, 0.02] |
| TOR_signPD_bradykinesia_coldspot_L | 0.37     | 2.45e-03  | .858     | 6.27e-06 | 2.50e-03 | [-0.01, 0.02] |
| TOR_signPD_bradykinesia_coldspot_R | 1.28     | 8.57e-03  | .366     | 7.70e-05 | 8.78e-03 | [-0.01, 0.02] |
| TOR_signPD_bradykinesia_hotspot_L  | 0.65     | 4.38e-03  | .815     | 1.96e-05 | 4.42e-03 | [-0.01, 0.02] |
| TOR_signPD_bradykinesia_hotspot_R  | 0.24     | 1.59e-03  | .903     | 2.61e-06 | 1.61e-03 | [-0.01, 0.01] |
| TOR_signPD_rigidity_coldspot_L     | 0.18     | 1.22e-03  | .942     | 1.53e-06 | 1.24e-03 | [-0.01, 0.01] |
| TOR_signPD_rigidity_coldspot_R     | 0.85     | 5.68e-03  | .624     | 3.36e-05 | 5.80e-03 | [-0.01, 0.02] |
| TOR_signPD_rigidity_hotspot_L      | -0.34    | -2.28e-03 | .811     | 5.29e-06 | 2.30e-03 | [-0.02, 0.01] |
| TOR_signPD_rigidity_hotspot_R      | 0.27     | 1.81e-03  | .964     | 3.37e-06 | 1.84e-03 | [-0.01, 0.02] |
| TOR_signPD_tremor_coldspot_L       | 1.32     | 8.77e-03  | .295     | 8.14e-05 | 9.02e-03 | [-0.01, 0.02] |
| TOR_signPD_tremor_coldspot_R       | 1.57     | 1.04e-02  | .215     | 1.15e-04 | 1.07e-02 | [-0.01, 0.02] |
| TOR_signPD_tremor_hotspot_L        | 0.18     | 1.25e-03  | .940     | 1.58e-06 | 1.26e-03 | [-0.01, 0.01] |
| TOR_signPD_tremor_hotspot_R        | 0.51     | 3.40e-03  | .750     | 1.20e-05 | 3.46e-03 | [-0.01, 0.02] |
| Zona_Incerta_Atlas_cZI_L           | 1.90     | 1.28e-02  | .126     | 1.69e-04 | 1.30e-02 | [-0.01, 0.03] |
| Zona_Incerta_Atlas_cZI_R           | 1.63     | 1.10e-02  | .141     | 1.25e-04 | 1.12e-02 | [-0.01, 0.02] |
| Zona_Incerta_Atlas_fct_L           | 1.97     | 1.32e-02  | .134     | 1.82e-04 | 1.35e-02 | <0.01, 0.03]  |
| Zona_Incerta_Atlas_fct_R           | 1.62     | 1.08e-02  | .194     | 1.23e-04 | 1.11e-02 | [-0.01, 0.02] |
| Zona_Incerta_Atlas_fl_L            | 0.31     | 2.11e-03  | .866     | 4.51e-06 | 2.12e-03 | [-0.01, 0.02] |
| Zona_Incerta_Atlas_fl_R            | 1.16     | 7.78e-03  | .427     | 6.34e-05 | 7.96e-03 | [-0.01, 0.02] |
| Zona_Incerta_Atlas_ft_L            | 1.30     | 8.78e-03  | .291     | 7.93e-05 | 8.91e-03 | [-0.01, 0.02] |

**Table S10*****ET PRS Associations with grey matter fractional anisotropy (FA) - LeadDBS\_Atlas\_compendium\_extendedTable***

| Tract                           | <i>t</i>    | $\beta$         | <i>p</i>    | Eta2            | Cohens_f        | 95% CI              |
|---------------------------------|-------------|-----------------|-------------|-----------------|-----------------|---------------------|
| Zona_Incerta_Atlas_ft_R         | 1.73        | 1.16e-02        | .197        | 1.40e-04        | 1.18e-02        | [-0.01, 0.02]       |
| Zona_Incerta_Atlas_gm_mask      | 1.42        | 9.54e-03        | .284        | 9.47e-05        | 9.73e-03        | [-0.01, 0.02]       |
| Zona_Incerta_Atlas_hf_L         | 1.16        | 7.82e-03        | .672        | 6.36e-05        | 7.97e-03        | [-0.01, 0.02]       |
| Zona_Incerta_Atlas_hf_R         | 1.92        | 1.28e-02        | .121        | 1.72e-04        | 1.31e-02        | [-0.01, 0.03]       |
| Zona_Incerta_Atlas_hfields_L    | 0.94        | 6.36e-03        | .581        | 4.14e-05        | 6.43e-03        | [-0.01, 0.02]       |
| Zona_Incerta_Atlas_hfields_R    | 1.69        | 1.13e-02        | .251        | 1.34e-04        | 1.16e-02        | [-0.01, 0.02]       |
| Zona_Incerta_Atlas_ml_L         | -0.12       | -7.92e-04       | .997        | 6.48e-07        | 8.05e-04        | [-0.01, 0.01]       |
| Zona_Incerta_Atlas_ml_R         | 0.11        | 7.31e-04        | 1.00        | 5.68e-07        | 7.53e-04        | [-0.01, 0.01]       |
| Zona_Incerta_Atlas_rZI_L        | 0.57        | 3.88e-03        | .625        | 1.53e-05        | 3.91e-03        | [-0.01, 0.02]       |
| Zona_Incerta_Atlas_rZI_R        | 1.15        | 7.74e-03        | .455        | 6.24e-05        | 7.90e-03        | [-0.01, 0.02]       |
| Zona_Incerta_Atlas_ZI_L         | 1.24        | 8.39e-03        | .395        | 7.20e-05        | 8.49e-03        | [-0.01, 0.02]       |
| Zona_Incerta_Atlas_ZI_R         | 1.47        | 9.86e-03        | .311        | 1.01e-04        | 1.01e-02        | [-0.01, 0.02]       |
| Zona_Incerta_Atlas_zRN_L        | 2.24        | 1.51e-02        | .069        | 2.35e-04        | 1.53e-02        | <0.01, 0.03]        |
| <b>Zona_Incerta_Atlas_zRN_R</b> | <b>2.94</b> | <b>1.98e-02</b> | <b>.007</b> | <b>4.06e-04</b> | <b>2.02e-02</b> | <b>[0.01, 0.03]</b> |
| Zona_Incerta_Atlas_zSTN_L       | 0.63        | 4.27e-03        | .832        | 1.85e-05        | 4.30e-03        | [-0.01, 0.02]       |
| Zona_Incerta_Atlas_zSTN_R       | -0.12       | -8.24e-04       | 1.00        | 7.02e-07        | 8.38e-04        | [-0.01, 0.01]       |

*Note*\* *p* < .05, \*\* *p* < .01, \*\*\* *p* < .001, 95% CI(B)**Table S11*****ET PRS Associations with grey matter – mean diffusivity (MD) - LeadDBS\_Atlas\_compendium\_extended (Zhang’s 2017 substantia nigra segmentation)***

| Tract                                                     | <i>t</i> | $\beta$  | <i>p</i> | Eta2     | Cohens_f | 95% CI            |
|-----------------------------------------------------------|----------|----------|----------|----------|----------|-------------------|
| Atlas_of_the_Human_Hypothalamus_anterior_commissure_<br>L | 0.03     | 5.87e-06 | 1.00     | 5.33e-08 | 2.31e-04 | [-0.01,<br><0.01] |

**Table S11**

*ET PRS Associations with grey matter – mean diffusivity (MD) - LeadDBS Atlas compendium extended (Zhang’s 2017 substantia nigra segmentation)*

| Tract                                                                         | <i>t</i> | $\beta$   | <i>p</i> | Eta2     | Cohens_f | 95% CI         |
|-------------------------------------------------------------------------------|----------|-----------|----------|----------|----------|----------------|
| Atlas_of_the_Human_Hypothalamus_anterior_commissure_R                         | -0.41    | -6.77e-05 | 1.00     | 7.74e-06 | 2.78e-03 | [-0.01, <0.01] |
| Atlas_of_the_Human_Hypothalamus_anterior_hypothalamic_area_L                  | 0.47     | 1.23e-04  | .701     | 1.04e-05 | 3.22e-03 | [-0.01, <0.01] |
| Atlas_of_the_Human_Hypothalamus_anterior_hypothalamic_area_R                  | 0.65     | 1.75e-04  | .565     | 2.00e-05 | 4.47e-03 | [-0.01, <0.01] |
| Atlas_of_the_Human_Hypothalamus_arcuate_hypothalamic_nucleus_L                | 1.21     | 4.95e-04  | .311     | 6.87e-05 | 8.29e-03 | [-0.01, <0.01] |
| Atlas_of_the_Human_Hypothalamus_arcuate_hypothalamic_nucleus_R                | 1.77     | 7.44e-04  | .140     | 1.47e-04 | 1.21e-02 | [-0.01, <0.01] |
| Atlas_of_the_Human_Hypothalamus_bed_nucleus_of_the_stria_terminalis_L         | 0.62     | 1.33e-04  | .840     | 1.81e-05 | 4.25e-03 | [-0.01, <0.01] |
| Atlas_of_the_Human_Hypothalamus_bed_nucleus_of_the_stria_terminalis_R         | 1.03     | 2.30e-04  | .370     | 4.98e-05 | 7.05e-03 | [-0.01, <0.01] |
| Atlas_of_the_Human_Hypothalamus_diagonal_band_of_Broca_L                      | -0.45    | -1.13e-04 | .796     | 9.57e-06 | 3.09e-03 | [-0.01, <0.01] |
| Atlas_of_the_Human_Hypothalamus_diagonal_band_of_Broca_R                      | 0.02     | 6.46e-06  | 1.00     | 2.53e-08 | 1.59e-04 | [-0.01, <0.01] |
| Atlas_of_the_Human_Hypothalamus_dorsal_periventricular_hypothalamic_nucleus_L | -0.08    | -2.55e-05 | 1.00     | 2.94e-07 | 5.42e-04 | [-0.01, <0.01] |
| Atlas_of_the_Human_Hypothalamus_dorsal_periventricular_hypothalamic_nucleus_R | 0.30     | 9.74e-05  | .863     | 4.19e-06 | 2.05e-03 | [-0.01, <0.01] |

**Table S11**

***ET PRS Associations with grey matter – mean diffusivity (MD) - LeadDBS Atlas compendium extended (Zhang’s 2017 substantia nigra segmentation)***

| Tract                                                              | <i>t</i> | $\beta$   | <i>p</i> | Eta2     | Cohens_f | 95% CI         |
|--------------------------------------------------------------------|----------|-----------|----------|----------|----------|----------------|
| Atlas_of_the_Human_Hypothalamus_dorsomedial_hypothalamic_nucleus_L | 0.39     | 1.09e-04  | .848     | 7.27e-06 | 2.70e-03 | [-0.01, <0.01] |
| Atlas_of_the_Human_Hypothalamus_dorsomedial_hypothalamic_nucleus_R | 0.73     | 2.27e-04  | .566     | 2.52e-05 | 5.02e-03 | [-0.01, <0.01] |
| Atlas_of_the_Human_Hypothalamus_fornix_L                           | 1.06     | 2.52e-04  | .355     | 5.25e-05 | 7.24e-03 | [-0.01, <0.01] |
| Atlas_of_the_Human_Hypothalamus_fornix_R                           | -0.04    | -1.07e-05 | 1.00     | 9.34e-08 | 3.06e-04 | [-0.01, <0.01] |
| Atlas_of_the_Human_Hypothalamus_gm_mask                            | 0.39     | 6.79e-05  | .766     | 7.12e-06 | 2.67e-03 | [-0.01, <0.01] |
| Atlas_of_the_Human_Hypothalamus_inferior_thalamic_peduncle_L       | 0.16     | 3.83e-05  | .958     | 1.23e-06 | 1.11e-03 | [-0.01, <0.01] |
| Atlas_of_the_Human_Hypothalamus_inferior_thalamic_peduncle_R       | -0.27    | -6.97e-05 | .924     | 3.34e-06 | 1.83e-03 | [-0.01, <0.01] |
| Atlas_of_the_Human_Hypothalamus_lateral_hypothalamus_L             | 0.81     | 1.99e-04  | .510     | 3.08e-05 | 5.55e-03 | [-0.01, <0.01] |
| Atlas_of_the_Human_Hypothalamus_lateral_hypothalamus_R             | -0.20    | -4.97e-05 | 1.00     | 1.88e-06 | 1.37e-03 | [-0.01, <0.01] |
| Atlas_of_the_Human_Hypothalamus_mammillary_bodies_L                | 1.56     | 5.21e-04  | .162     | 1.15e-04 | 1.07e-02 | [-0.01, <0.01] |
| Atlas_of_the_Human_Hypothalamus_mammillary_bodies_R                | 1.60     | 5.46e-04  | .152     | 1.19e-04 | 1.09e-02 | [-0.01, <0.01] |

**Table S11**

***ET PRS Associations with grey matter – mean diffusivity (MD) - LeadDBS Atlas compendium extended (Zhang’s 2017 substantia nigra segmentation)***

| Tract                                                                         | <i>t</i>    | $\beta$         | <i>p</i>    | Eta2            | Cohens_f        | 95% CI                     |
|-------------------------------------------------------------------------------|-------------|-----------------|-------------|-----------------|-----------------|----------------------------|
| Atlas_of_the_Human_Hypothalamus_mammillothalamic_tract_L                      | 0.04        | 9.59e-06        | 1.00        | 8.53e-08        | 2.92e-04        | [-0.01, <0.01]             |
| Atlas_of_the_Human_Hypothalamus_mammillothalamic_tract_R                      | -0.24       | -5.65e-05       | .986        | 2.80e-06        | 1.67e-03        | [-0.01, <0.01]             |
| Atlas_of_the_Human_Hypothalamus_medial_preoptic_nucleus_L                     | -0.55       | -1.42e-04       | .800        | 1.42e-05        | 3.77e-03        | [-0.01, <0.01]             |
| Atlas_of_the_Human_Hypothalamus_medial_preoptic_nucleus_R                     | 0.41        | 1.31e-04        | .747        | 8.03e-06        | 2.83e-03        | [-0.01, <0.01]             |
| Atlas_of_the_Human_Hypothalamus_nucleus_basalis_of_Meynert_L                  | 0.39        | 7.56e-05        | .784        | 7.05e-06        | 2.65e-03        | [-0.01, <0.01]             |
| Atlas_of_the_Human_Hypothalamus_nucleus_basalis_of_Meynert_R                  | -1.07       | -2.03e-04       | .348        | 5.36e-05        | 7.32e-03        | [-0.01, <0.01]             |
| Atlas_of_the_Human_Hypothalamus_paraventricular_nucleus_L                     | 0.30        | 9.05e-05        | .840        | 4.25e-06        | 2.06e-03        | [-0.01, <0.01]             |
| Atlas_of_the_Human_Hypothalamus_paraventricular_nucleus_R                     | 1.31        | 5.47e-04        | .260        | 8.07e-05        | 8.99e-03        | [-0.01, <0.01]             |
| Atlas_of_the_Human_Hypothalamus_periventricular_hypothalamic_nucleus_L        | 0.75        | 2.39e-04        | .496        | 2.66e-05        | 5.16e-03        | [-0.01, <0.01]             |
| <b>Atlas_of_the_Human_Hypothalamus_periventricular_hypothalamic_nucleus_R</b> | <b>2.05</b> | <b>7.34e-04</b> | <b>.049</b> | <b>1.97e-04</b> | <b>1.40e-02</b> | <b>&lt;0.01, &lt;0.01]</b> |
| Atlas_of_the_Human_Hypothalamus_posterior_hypothalamic_nucleus_L              | 0.33        | 9.32e-05        | .817        | 5.06e-06        | 2.25e-03        | [-0.01, <0.01]             |

**Table S11**

*ET PRS Associations with grey matter – mean diffusivity (MD) - LeadDBS Atlas compendium\_extended (Zhang's 2017 substantia nigra segmentation)*

| Tract                                                                      | <i>t</i> | $\beta$   | <i>p</i> | Eta2     | Cohens_f | 95% CI            |
|----------------------------------------------------------------------------|----------|-----------|----------|----------|----------|-------------------|
| Atlas_of_the_Human_Hypothalamus_posterior_hypotahalam<br>ic_nucleus_R      | 0.67     | 2.25e-04  | .615     | 2.10e-05 | 4.59e-03 | [-0.01,<br><0.01] |
| Atlas_of_the_Human_Hypothalamus_red_nucleus_L                              | -0.41    | -8.08e-05 | .874     | 7.78e-06 | 2.79e-03 | [-0.01,<br><0.01] |
| Atlas_of_the_Human_Hypothalamus_red_nucleus_R                              | -0.74    | -1.49e-04 | .561     | 2.57e-05 | 5.07e-03 | [-0.01,<br><0.01] |
| Atlas_of_the_Human_Hypothalamus_substantia_nigra_L                         | 0.19     | 3.90e-05  | .935     | 1.68e-06 | 1.30e-03 | [-0.01,<br><0.01] |
| Atlas_of_the_Human_Hypothalamus_substantia_nigra_R                         | -0.37    | -7.37e-05 | .867     | 6.53e-06 | 2.55e-03 | [-0.01,<br><0.01] |
| Atlas_of_the_Human_Hypothalamus_subthalamic_nucleus_<br>L                  | -0.44    | -1.07e-04 | .866     | 9.05e-06 | 3.01e-03 | [-0.01,<br><0.01] |
| Atlas_of_the_Human_Hypothalamus_subthalamic_nucleus_<br>R                  | -0.39    | -9.69e-05 | .765     | 7.16e-06 | 2.68e-03 | [-0.01,<br><0.01] |
| Atlas_of_the_Human_Hypothalamus_suprachiasmatic_hypot<br>halamic_nucleus_L | -0.05    | -2.08e-05 | 1.00     | 1.15e-07 | 3.39e-04 | [-0.01,<br><0.01] |
| Atlas_of_the_Human_Hypothalamus_suprachiasmatic_hypot<br>halamic_nucleus_R | 0.96     | 4.05e-04  | .526     | 4.36e-05 | 6.60e-03 | [-0.01,<br><0.01] |
| Atlas_of_the_Human_Hypothalamus_supraoptic_hypothala<br>mic_nucleus_L      | 0.53     | 1.65e-04  | .653     | 1.33e-05 | 3.65e-03 | [-0.01,<br><0.01] |
| Atlas_of_the_Human_Hypothalamus_supraoptic_hypothala<br>mic_nucleus_R      | 0.68     | 2.13e-04  | .609     | 2.19e-05 | 4.68e-03 | [-0.01,<br><0.01] |



**Table S11**

*ET PRS Associations with grey matter – mean diffusivity (MD) - LeadDBS Atlas compendium\_extended (Zhang’s 2017 substantia nigra segmentation)*

| Tract                                                                   | <i>t</i> | $\beta$   | <i>p</i> | Eta2     | Cohens_f | 95% CI         |
|-------------------------------------------------------------------------|----------|-----------|----------|----------|----------|----------------|
| Atlas_of_the_Human_Hypothalamus_tuberomammillary_hypothalamic_nucleus_L | 1.53     | 4.85e-04  | .154     | 1.10e-04 | 1.05e-02 | [-0.01, <0.01] |
| Atlas_of_the_Human_Hypothalamus_tuberomammillary_hypothalamic_nucleus_R | 0.91     | 2.81e-04  | .441     | 3.92e-05 | 6.26e-03 | [-0.01, <0.01] |
| Atlas_of_the_Human_Hypothalamus_ventromedial_hypothalamus_L             | 0.99     | 2.88e-04  | .395     | 4.58e-05 | 6.76e-03 | [-0.01, <0.01] |
| Atlas_of_the_Human_Hypothalamus_ventromedial_hypothalamus_R             | 1.13     | 3.33e-04  | .314     | 6.02e-05 | 7.76e-03 | [-0.01, <0.01] |
| Atlas_of_the_Human_Hypothalamus_zona_incerta_L                          | -0.60    | -1.46e-04 | .756     | 1.68e-05 | 4.10e-03 | [-0.01, <0.01] |
| Atlas_of_the_Human_Hypothalamus_zona_incerta_R                          | -0.78    | -1.96e-04 | .533     | 2.84e-05 | 5.33e-03 | [-0.01, <0.01] |
| Brainstem_Connectome_Atlas_CST_L                                        | 0.89     | 1.75e-04  | .458     | 3.69e-05 | 6.08e-03 | [-0.01, <0.01] |
| Brainstem_Connectome_Atlas_CST_R                                        | 0.53     | 9.75e-05  | .737     | 1.34e-05 | 3.66e-03 | [-0.01, <0.01] |
| Brainstem_Connectome_Atlas_FPT_L                                        | 1.48     | 3.28e-04  | .220     | 1.02e-04 | 1.01e-02 | [-0.01, <0.01] |
| Brainstem_Connectome_Atlas_FPT_R                                        | 1.19     | 2.56e-04  | .366     | 6.67e-05 | 8.17e-03 | [-0.01, <0.01] |
| Brainstem_Connectome_Atlas_gm_mask                                      | 0.32     | 4.75e-05  | .821     | 4.91e-06 | 2.22e-03 | [-0.01, <0.01] |

**Table S11**

*ET PRS Associations with grey matter – mean diffusivity (MD) - LeadDBS\_Atlas\_compendium\_extended (Zhang's 2017 substantia nigra segmentation)*

| Tract                              | <i>t</i> | $\beta$   | <i>p</i> | Eta2     | Cohens_f | 95% CI            |
|------------------------------------|----------|-----------|----------|----------|----------|-------------------|
| Brainstem_Connectome_Atlas_ICPMC_L | -0.26    | -3.51e-05 | .873     | 3.21e-06 | 1.79e-03 | [-0.01,<br><0.01] |
| Brainstem_Connectome_Atlas_ICPMC_R | -0.54    | -7.11e-05 | .813     | 1.35e-05 | 3.67e-03 | [-0.01,<br><0.01] |
| Brainstem_Connectome_Atlas_ICPVC_L | -0.29    | -3.61e-05 | .850     | 3.90e-06 | 1.97e-03 | [-0.01,<br><0.01] |
| Brainstem_Connectome_Atlas_ICPVC_R | -0.60    | -7.73e-05 | .720     | 1.68e-05 | 4.10e-03 | [-0.01,<br><0.01] |
| Brainstem_Connectome_Atlas_LL_L    | 1.14     | 2.26e-04  | .398     | 6.12e-05 | 7.82e-03 | [-0.01,<br><0.01] |
| Brainstem_Connectome_Atlas_LL_R    | 0.20     | 3.59e-05  | .925     | 1.89e-06 | 1.37e-03 | [-0.01,<br><0.01] |
| Brainstem_Connectome_Atlas_MCP_M   | 0.38     | 4.74e-05  | .858     | 6.84e-06 | 2.62e-03 | [-0.01,<br><0.01] |
| Brainstem_Connectome_Atlas_ML_L    | 0.48     | 6.92e-05  | .698     | 1.06e-05 | 3.25e-03 | [-0.01,<br><0.01] |
| Brainstem_Connectome_Atlas_ML_R    | 0.50     | 6.86e-05  | .849     | 1.17e-05 | 3.42e-03 | [-0.01,<br><0.01] |
| Brainstem_Connectome_Atlas_POTPT_L | 0.67     | 1.25e-04  | .615     | 2.10e-05 | 4.59e-03 | [-0.01,<br><0.01] |
| Brainstem_Connectome_Atlas_POTPT_R | 0.13     | 2.18e-05  | .988     | 7.65e-07 | 8.75e-04 | [-0.01,<br><0.01] |

**Table S11**

*ET PRS Associations with grey matter – mean diffusivity (MD) - LeadDBS\_Atlas\_compendium\_extended (Zhang’s 2017 substantia nigra segmentation)*

| Tract                              | <i>t</i> | $\beta$   | <i>p</i> | Eta2     | Cohens_f | 95% CI            |
|------------------------------------|----------|-----------|----------|----------|----------|-------------------|
| Brainstem_Connectome_Atlas_SCPCR_L | -0.60    | -6.49e-05 | .673     | 1.67e-05 | 4.09e-03 | [-0.01,<br><0.01] |
| Brainstem_Connectome_Atlas_SCPCR_R | -0.46    | -5.16e-05 | .787     | 1.00e-05 | 3.17e-03 | [-0.01,<br><0.01] |
| Brainstem_Connectome_Atlas_SCPCT_L | -0.43    | -4.75e-05 | .815     | 8.69e-06 | 2.95e-03 | [-0.01,<br><0.01] |
| Brainstem_Connectome_Atlas_SCPCT_R | -0.37    | -4.10e-05 | .869     | 6.43e-06 | 2.54e-03 | [-0.01,<br><0.01] |
| Brainstem_Connectome_Atlas_SCPSC_L | 0.56     | 1.11e-04  | .630     | 1.49e-05 | 3.86e-03 | [-0.01,<br><0.01] |
| Brainstem_Connectome_Atlas_SCPSC_R | 0.04     | 6.69e-06  | 1.00     | 7.33e-08 | 2.71e-04 | [-0.01,<br><0.01] |
| Brainstem_Connectome_Atlas_STT_L   | 0.62     | 1.10e-04  | .591     | 1.78e-05 | 4.22e-03 | [-0.01,<br><0.01] |
| Brainstem_Connectome_Atlas_STT_R   | 0.49     | 7.30e-05  | .730     | 1.12e-05 | 3.35e-03 | [-0.01,<br><0.01] |
| DBS_targets_AD_FORNIX_L            | -0.18    | -4.01e-05 | 1.00     | 1.49e-06 | 1.22e-03 | [-0.01,<br><0.01] |
| DBS_targets_AD_FORNIX_R            | 0.42     | 9.65e-05  | .740     | 8.38e-06 | 2.90e-03 | [-0.01,<br><0.01] |
| DBS_targets_ADD_NAc_L              | -0.07    | -2.15e-05 | 1.00     | 2.63e-07 | 5.13e-04 | [-0.01,<br><0.01] |

**Table S11**

*ET PRS Associations with grey matter – mean diffusivity (MD) - LeadDBS\_Atlas\_compendium\_extended (Zhang’s 2017 substantia nigra segmentation)*

| Tract                  | <i>t</i> | $\beta$   | <i>p</i> | Eta2     | Cohens_f | 95% CI            |
|------------------------|----------|-----------|----------|----------|----------|-------------------|
| DBS_targets_ADD_NAc_R  | -0.30    | -8.30e-05 | .844     | 4.10e-06 | 2.02e-03 | [-0.01,<br><0.01] |
| DBS_targets_Dyt_GPi_L  | 1.23     | 2.34e-04  | .342     | 7.12e-05 | 8.44e-03 | [-0.01,<br><0.01] |
| DBS_targets_Dyt_GPi_R  | 0.45     | 8.06e-05  | .775     | 9.39e-06 | 3.06e-03 | [-0.01,<br><0.01] |
| DBS_targets_ET_VIM_L   | 0.06     | 9.85e-06  | 1.00     | 1.82e-07 | 4.26e-04 | [-0.01,<br><0.01] |
| DBS_targets_ET_VIM_R   | 0.06     | 9.48e-06  | 1.00     | 1.64e-07 | 4.05e-04 | [-0.01,<br><0.01] |
| DBS_targets_MD_SCC_L   | -1.38    | -2.18e-04 | .250     | 8.97e-05 | 9.47e-03 | [-0.01,<br><0.01] |
| DBS_targets_MD_SCC_R   | -1.12    | -1.80e-04 | .322     | 5.86e-05 | 7.66e-03 | [-0.01,<br><0.01] |
| DBS_targets_OCD_ALIC_L | 0.61     | 1.07e-04  | .597     | 1.74e-05 | 4.17e-03 | [-0.01,<br><0.01] |
| DBS_targets_OCD_ALIC_R | 0.73     | 1.26e-04  | .566     | 2.52e-05 | 5.02e-03 | [-0.01,<br><0.01] |
| DBS_targets_OCD_NAc_L  | -0.58    | -1.43e-04 | .689     | 1.56e-05 | 3.95e-03 | [-0.01,<br><0.01] |
| DBS_targets_OCD_NAc_R  | -0.78    | -2.02e-04 | .596     | 2.87e-05 | 5.36e-03 | [-0.01,<br><0.01] |

**Table S11**

*ET PRS Associations with grey matter – mean diffusivity (MD) - LeadDBS\_Atlas\_compendium\_extended (Zhang's 2017 substantia nigra segmentation)*

| Tract                                    | <i>t</i> | $\beta$   | <i>p</i> | Eta2     | Cohens_f | 95% CI            |
|------------------------------------------|----------|-----------|----------|----------|----------|-------------------|
| DBS_targets_PD_STN_L                     | -1.19    | -2.76e-04 | .368     | 6.64e-05 | 8.15e-03 | [-0.01,<br><0.01] |
| DBS_targets_PD_STN_R                     | -0.64    | -1.60e-04 | .718     | 1.92e-05 | 4.38e-03 | [-0.01,<br><0.01] |
| DBS_targets_TS_CMPVVOI_L                 | <0.01    | 6.12e-07  | 1.00     | 3.66e-10 | 1.91e-05 | [-0.01,<br><0.01] |
| DBS_targets_TS_CMPVVOI_R                 | -0.51    | -1.19e-04 | .674     | 1.20e-05 | 3.46e-03 | [-0.01,<br><0.01] |
| DBS_Tractography_Atlas_Ca                | 1.53     | 3.49e-04  | .155     | 1.09e-04 | 1.04e-02 | [-0.01,<br><0.01] |
| DBS_Tractography_Atlas_EXA               | 0.92     | 1.73e-04  | .442     | 3.94e-05 | 6.28e-03 | [-0.01,<br><0.01] |
| DBS_Tractography_Atlas_HN                | 1.80     | 6.10e-04  | .098     | 1.53e-04 | 1.24e-02 | [-0.01,<br><0.01] |
| DBS_Tractography_Atlas_HTH               | 0.65     | 1.47e-04  | .623     | 1.99e-05 | 4.46e-03 | [-0.01,<br><0.01] |
| DBS_Tractography_Atlas_L_STN_associative | -0.68    | -1.90e-04 | .609     | 2.15e-05 | 4.64e-03 | [-0.01,<br><0.01] |
| DBS_Tractography_Atlas_L_STN_limbic      | -0.36    | -9.37e-05 | .790     | 6.10e-06 | 2.47e-03 | [-0.01,<br><0.01] |
| DBS_Tractography_Atlas_L_STN_motor       | -1.34    | -3.09e-04 | .284     | 8.39e-05 | 9.16e-03 | [-0.01,<br><0.01] |

**Table S11**

*ET PRS Associations with grey matter – mean diffusivity (MD) - LeadDBS\_Atlas\_compendium\_extended (Zhang's 2017 substantia nigra segmentation)*

| Tract                                    | <i>t</i> | $\beta$   | <i>p</i> | Eta2     | Cohens_f | 95% CI            |
|------------------------------------------|----------|-----------|----------|----------|----------|-------------------|
| DBS_Tractography_Atlas_MN                | 1.63     | 5.06e-04  | .162     | 1.25e-04 | 1.12e-02 | [-0.01,<br><0.01] |
| DBS_Tractography_Atlas_NAC               | -0.21    | -3.70e-05 | 1.00     | 2.09e-06 | 1.44e-03 | [-0.01,<br><0.01] |
| DBS_Tractography_Atlas_PBP               | -0.51    | -9.00e-05 | .746     | 1.22e-05 | 3.49e-03 | [-0.01,<br><0.01] |
| DBS_Tractography_Atlas_Pu                | 0.83     | 9.89e-05  | .444     | 3.27e-05 | 5.72e-03 | [-0.01,<br><0.01] |
| DBS_Tractography_Atlas_R_STN_associative | -0.70    | -1.93e-04 | .531     | 2.31e-05 | 4.81e-03 | [-0.01,<br><0.01] |
| DBS_Tractography_Atlas_R_STN_limbic      | -0.73    | -2.10e-04 | .512     | 2.49e-05 | 4.99e-03 | [-0.01,<br><0.01] |
| DBS_Tractography_Atlas_R_STN_motor       | -0.46    | -1.08e-04 | .711     | 9.87e-06 | 3.14e-03 | [-0.01,<br><0.01] |
| DBS_Tractography_Atlas_SNc               | -0.34    | -6.15e-05 | .899     | 5.34e-06 | 2.31e-03 | [-0.01,<br><0.01] |
| DBS_Tractography_Atlas_SNr               | -0.08    | -1.50e-05 | 1.00     | 2.68e-07 | 5.18e-04 | [-0.01,<br><0.01] |
| DBS_Tractography_Atlas_VeP               | -0.18    | -4.16e-05 | .940     | 1.57e-06 | 1.25e-03 | [-0.01,<br><0.01] |
| DBS_Tractography_Atlas_VTA               | -0.01    | -1.69e-06 | 1.00     | 3.92e-09 | 6.26e-05 | [-0.01,<br><0.01] |

**Table S11**

*ET PRS Associations with grey matter – mean diffusivity (MD) - LeadDBS\_Atlas\_compendium\_extended (Zhang’s 2017 substantia nigra segmentation)*

| Tract                                                                             | <i>t</i> | $\beta$   | <i>p</i> | Eta2     | Cohens_f | 95% CI            |
|-----------------------------------------------------------------------------------|----------|-----------|----------|----------|----------|-------------------|
| Dystonia_Response_Tract_Atlas_Sweetspot_cervical_L                                | 0.91     | 1.38e-04  | .569     | 3.90e-05 | 6.25e-03 | [-0.01,<br><0.01] |
| Dystonia_Response_Tract_Atlas_Sweetspot_cervical_R                                | -0.48    | -6.86e-05 | .776     | 1.06e-05 | 3.25e-03 | [-0.01,<br><0.01] |
| Dystonia_Response_Tract_Atlas_Sweetspot_generalized_L                             | 0.87     | 1.31e-04  | .730     | 3.51e-05 | 5.93e-03 | [-0.01,<br><0.01] |
| Dystonia_Response_Tract_Atlas_Sweetspot_generalized_R                             | -0.11    | -1.57e-05 | 1.00     | 5.28e-07 | 7.27e-04 | [-0.01,<br><0.01] |
| Nigral_O’Donnell Research Group<br>(ORG)anization_atlas_lateral_SNc_somatomotor_L | -0.11    | -2.45e-05 | 1.00     | 6.02e-07 | 7.76e-04 | [-0.01,<br><0.01] |
| Nigral_O’Donnell Research Group<br>(ORG)anization_atlas_lateral_SNc_somatomotor_R | -1.12    | -2.44e-04 | .322     | 5.86e-05 | 7.66e-03 | [-0.01,<br><0.01] |
| Nigral_O’Donnell Research Group<br>(ORG)anization_atlas_medial_SNc_limbic_L       | 0.17     | 3.78e-05  | .949     | 1.41e-06 | 1.19e-03 | [-0.01,<br><0.01] |
| Nigral_O’Donnell Research Group<br>(ORG)anization_atlas_medial_SNc_limbic_R       | -1.09    | -2.39e-04 | .335     | 5.61e-05 | 7.49e-03 | [-0.01,<br><0.01] |
| Nigral_O’Donnell Research Group<br>(ORG)anization_atlas_ventral_SN_associative_L  | 0.24     | 5.57e-05  | .903     | 2.70e-06 | 1.64e-03 | [-0.01,<br><0.01] |
| Nigral_O’Donnell Research Group<br>(ORG)anization_atlas_ventral_SN_associative_R  | -0.80    | -1.87e-04 | .516     | 3.02e-05 | 5.49e-03 | [-0.01,<br><0.01] |
| Striatal_Functional_Networks_17Networks_1                                         | -1.01    | -1.59e-04 | .341     | 4.82e-05 | 6.95e-03 | [-0.01,<br><0.01] |

**Table S11**

*ET PRS Associations with grey matter – mean diffusivity (MD) - LeadDBS\_Atlas\_compendium\_extended (Zhang’s 2017 substantia nigra segmentation)*

| Tract                                      | <i>t</i> | $\beta$   | <i>p</i> | Eta2     | Cohens_f | 95% CI         |
|--------------------------------------------|----------|-----------|----------|----------|----------|----------------|
| Striatal_Functional_Networks_17Networks_10 | 0.01     | 1.35e-06  | 1.00     | 3.29e-09 | 5.74e-05 | [-0.01, <0.01] |
| Striatal_Functional_Networks_17Networks_12 | 0.15     | 1.88e-05  | .972     | 9.99e-07 | 9.99e-04 | [-0.01, <0.01] |
| Striatal_Functional_Networks_17Networks_13 | 1.42     | 5.32e-04  | .171     | 9.46e-05 | 9.72e-03 | [-0.01, <0.01] |
| Striatal_Functional_Networks_17Networks_14 | 2.13     | 3.01e-04  | .061     | 2.12e-04 | 1.46e-02 | [<0.01, <0.01] |
| Striatal_Functional_Networks_17Networks_16 | 1.04     | 2.89e-04  | .328     | 5.08e-05 | 7.13e-03 | [-0.01, <0.01] |
| Striatal_Functional_Networks_17Networks_17 | 1.55     | 3.32e-04  | .133     | 1.13e-04 | 1.06e-02 | [-0.01, <0.01] |
| Striatal_Functional_Networks_17Networks_3  | 1.44     | 1.81e-04  | .236     | 9.72e-05 | 9.86e-03 | [-0.01, <0.01] |
| Striatal_Functional_Networks_17Networks_4  | 0.48     | 6.57e-05  | .835     | 1.09e-05 | 3.30e-03 | [-0.01, <0.01] |
| Striatal_Functional_Networks_17Networks_6  | -0.19    | -3.01e-05 | .932     | 1.74e-06 | 1.32e-03 | [-0.01, <0.01] |
| Striatal_Functional_Networks_17Networks_7  | 1.22     | 1.63e-04  | .307     | 6.96e-05 | 8.34e-03 | [-0.01, <0.01] |
| Striatal_Functional_Networks_17Networks_8  | 1.13     | 1.46e-04  | .285     | 5.98e-05 | 7.73e-03 | [-0.01, <0.01] |



**Table S11**

*ET PRS Associations with grey matter – mean diffusivity (MD) - LeadDBS\_Atlas\_compendium\_extended (Zhang’s 2017 substantia nigra segmentation)*

| Tract                                     | <i>t</i> | $\beta$   | <i>p</i> | Eta2     | Cohens_f | 95% CI            |
|-------------------------------------------|----------|-----------|----------|----------|----------|-------------------|
| Striatal_Functional_Networks_17Networks_9 | -0.11    | -1.56e-05 | 1.00     | 5.35e-07 | 7.31e-04 | [-0.01,<br><0.01] |
| Striatal_Functional_Networks_7Networks_1  | -1.01    | -1.59e-04 | .341     | 4.82e-05 | 6.95e-03 | [-0.01,<br><0.01] |
| Striatal_Functional_Networks_7Networks_2  | 1.10     | 1.37e-04  | .372     | 5.70e-05 | 7.55e-03 | [-0.01,<br><0.01] |
| Striatal_Functional_Networks_7Networks_3  | -0.31    | -4.28e-05 | .832     | 4.50e-06 | 2.12e-03 | [-0.01,<br><0.01] |
| Striatal_Functional_Networks_7Networks_4  | 1.30     | 1.67e-04  | .235     | 7.96e-05 | 8.92e-03 | [-0.01,<br><0.01] |
| Striatal_Functional_Networks_7Networks_5  | -0.03    | -4.32e-06 | 1.00     | 3.38e-08 | 1.84e-04 | [-0.01,<br><0.01] |
| Striatal_Functional_Networks_7Networks_6  | 1.27     | 2.19e-04  | .224     | 7.59e-05 | 8.71e-03 | [-0.01,<br><0.01] |
| Striatal_Functional_Networks_7Networks_7  | 1.19     | 3.37e-04  | .256     | 6.68e-05 | 8.18e-03 | [-0.01,<br><0.01] |
| Thalamic_Functional_Atlas_1_L             | -0.21    | -2.77e-05 | .918     | 2.05e-06 | 1.43e-03 | [-0.01,<br><0.01] |
| Thalamic_Functional_Atlas_1_R             | -0.21    | -2.77e-05 | .918     | 2.05e-06 | 1.43e-03 | [-0.01,<br><0.01] |
| Thalamic_Functional_Atlas_10_L            | 1.69     | 3.25e-04  | .142     | 1.34e-04 | 1.16e-02 | [-0.01,<br><0.01] |

**Table S11**

*ET PRS Associations with grey matter – mean diffusivity (MD) - LeadDBS\_Atlas\_compendium\_extended (Zhang’s 2017 substantia nigra segmentation)*

| Tract                                  | <i>t</i>    | $\beta$         | <i>p</i>    | Eta2            | Cohens_f        | 95% CI                      |
|----------------------------------------|-------------|-----------------|-------------|-----------------|-----------------|-----------------------------|
| Thalamic_Functional_Atlas_10_R         | 0.05        | 7.84e-06        | 1.00        | 1.22e-07        | 3.49e-04        | [-0.01, <0.01]              |
| Thalamic_Functional_Atlas_11_L         | 2.01        | 3.97e-04        | .081        | 1.90e-04        | 1.38e-02        | [<0.01, <0.01]              |
| Thalamic_Functional_Atlas_11_R         | 1.83        | 3.97e-04        | .093        | 1.56e-04        | 1.25e-02        | [-0.01, <0.01]              |
| Thalamic_Functional_Atlas_12_L         | 0.44        | 1.72e-04        | .766        | 8.94e-06        | 2.99e-03        | [-0.01, <0.01]              |
| Thalamic_Functional_Atlas_12_R         | 0.53        | 1.77e-04        | .657        | 1.31e-05        | 3.62e-03        | [-0.01, <0.01]              |
| Thalamic_Functional_Atlas_13_R         | 0.49        | 8.32e-05        | .686        | 1.13e-05        | 3.36e-03        | [-0.01, <0.01]              |
| <b>Thalamic_Functional_Atlas_13A_L</b> | <b>2.56</b> | <b>4.66e-04</b> | <b>.015</b> | <b>3.06e-04</b> | <b>1.75e-02</b> | <b>[&lt;0.01, &lt;0.01]</b> |
| Thalamic_Functional_Atlas_13B_L        | -0.43       | -6.27e-05       | .918        | 8.64e-06        | 2.94e-03        | [-0.01, <0.01]              |
| <b>Thalamic_Functional_Atlas_14_L</b>  | <b>2.48</b> | <b>1.08e-03</b> | <b>.020</b> | <b>2.89e-04</b> | <b>1.70e-02</b> | <b>[&lt;0.01, &lt;0.01]</b> |
| <b>Thalamic_Functional_Atlas_14_R</b>  | <b>2.15</b> | <b>9.20e-04</b> | <b>.049</b> | <b>2.17e-04</b> | <b>1.47e-02</b> | <b>[&lt;0.01, &lt;0.01]</b> |
| Thalamic_Functional_Atlas_15_L         | 1.09        | 1.47e-04        | .379        | 5.56e-05        | 7.46e-03        | [-0.01, <0.01]              |

**Table S11**

*ET PRS Associations with grey matter – mean diffusivity (MD) - LeadDBS\_Atlas\_compendium\_extended (Zhang’s 2017 substantia nigra segmentation)*

| Tract                                 | <i>t</i>    | $\beta$         | <i>p</i>    | Eta2            | Cohens_f        | 95% CI                      |
|---------------------------------------|-------------|-----------------|-------------|-----------------|-----------------|-----------------------------|
| <b>Thalamic_Functional_Atlas_15_R</b> | <b>2.24</b> | <b>3.82e-04</b> | <b>.034</b> | <b>2.36e-04</b> | <b>1.53e-02</b> | <b>[&lt;0.01, &lt;0.01]</b> |
| Thalamic_Functional_Atlas_2_L         | 0.27        | 3.80e-05        | .865        | 3.45e-06        | 1.86e-03        | [-0.01, <0.01]              |
| Thalamic_Functional_Atlas_2_R         | 0.55        | 7.99e-05        | .706        | 1.43e-05        | 3.78e-03        | [-0.01, <0.01]              |
| <b>Thalamic_Functional_Atlas_3_R</b>  | <b>2.27</b> | <b>3.83e-04</b> | <b>.028</b> | <b>2.42e-04</b> | <b>1.56e-02</b> | <b>[&lt;0.01, &lt;0.01]</b> |
| Thalamic_Functional_Atlas_4_R         | 1.69        | 2.50e-04        | .126        | 1.33e-04        | 1.16e-02        | [-0.01, <0.01]              |
| Thalamic_Functional_Atlas_4A_L        | -0.18       | -2.44e-05       | 1.00        | 1.57e-06        | 1.25e-03        | [-0.01, <0.01]              |
| <b>Thalamic_Functional_Atlas_4B_L</b> | <b>2.12</b> | <b>3.65e-04</b> | <b>.042</b> | <b>2.11e-04</b> | <b>1.45e-02</b> | <b>[&lt;0.01, &lt;0.01]</b> |
| Thalamic_Functional_Atlas_5_R         | 1.65        | 5.02e-04        | .136        | 1.28e-04        | 1.13e-02        | [-0.01, <0.01]              |
| Thalamic_Functional_Atlas_6_L         | 1.12        | 2.60e-04        | .362        | 5.87e-05        | 7.66e-03        | [-0.01, <0.01]              |
| Thalamic_Functional_Atlas_6_R         | 0.21        | 5.06e-05        | .914        | 2.15e-06        | 1.47e-03        | [-0.01, <0.01]              |
| <b>Thalamic_Functional_Atlas_7_L</b>  | <b>2.40</b> | <b>6.97e-04</b> | <b>.026</b> | <b>2.70e-04</b> | <b>1.64e-02</b> | <b>[&lt;0.01, &lt;0.01]</b> |

**Table S11**

*ET PRS Associations with grey matter – mean diffusivity (MD) - LeadDBS\_Atlas\_compendium\_extended (Zhang’s 2017 substantia nigra segmentation)*

| Tract                               | <i>t</i> | $\beta$   | <i>p</i> | Eta2     | Cohens_f | 95% CI            |
|-------------------------------------|----------|-----------|----------|----------|----------|-------------------|
| Thalamic_Functional_Atlas_7_R       | 1.79     | 4.92e-04  | .082     | 1.49e-04 | 1.22e-02 | [-0.01,<br><0.01] |
| Thalamic_Functional_Atlas_8_L       | 0.78     | 8.73e-05  | .601     | 2.83e-05 | 5.32e-03 | [-0.01,<br><0.01] |
| Thalamic_Functional_Atlas_8_R       | 0.78     | 9.72e-05  | .535     | 2.82e-05 | 5.31e-03 | [-0.01,<br><0.01] |
| Thalamic_Functional_Atlas_9_R       | 1.79     | 5.40e-04  | .135     | 1.50e-04 | 1.23e-02 | [-0.01,<br><0.01] |
| Thalamic_Functional_Atlas_9A_L      | 1.79     | 5.73e-04  | .100     | 1.51e-04 | 1.23e-02 | [-0.01,<br><0.01] |
| Thalamic_Functional_Atlas_9B_L      | 2.01     | 6.16e-04  | .082     | 1.89e-04 | 1.38e-02 | [<0.01,<br><0.01] |
| TOR_PSM_dystonia_gpi_n64_coldspot_L | 0.52     | 7.96e-05  | .666     | 1.25e-05 | 3.54e-03 | [-0.01,<br><0.01] |
| TOR_PSM_dystonia_gpi_n64_coldspot_R | -0.15    | -2.19e-05 | 1.00     | 9.96e-07 | 9.98e-04 | [-0.01,<br><0.01] |
| TOR_PSM_dystonia_gpi_n64_hotspot_L  | 0.79     | 1.09e-04  | .619     | 2.90e-05 | 5.38e-03 | [-0.01,<br><0.01] |
| TOR_PSM_dystonia_gpi_n64_hotspot_R  | -0.22    | -2.97e-05 | .908     | 2.29e-06 | 1.51e-03 | [-0.01,<br><0.01] |
| TOR_PSM_pd_gpi_n28_coldspot_L       | 0.60     | 1.06e-04  | .669     | 1.70e-05 | 4.12e-03 | [-0.01,<br><0.01] |

**Table S11**

*ET PRS Associations with grey matter – mean diffusivity (MD) - LeadDBS\_Atlas\_compendium\_extended (Zhang’s 2017 substantia nigra segmentation)*

| Tract                            | <i>t</i> | $\beta$   | <i>p</i> | Eta2     | Cohens_f | 95% CI            |
|----------------------------------|----------|-----------|----------|----------|----------|-------------------|
| TOR_PSM_pd_gpi_n28_coldspot_R    | -0.80    | -1.34e-04 | .465     | 3.01e-05 | 5.49e-03 | [-0.01,<br><0.01] |
| TOR_PSM_pd_gpi_n28_hotspot_L     | 0.90     | 1.40e-04  | .505     | 3.81e-05 | 6.18e-03 | [-0.01,<br><0.01] |
| TOR_PSM_pd_gpi_n28_hotspot_R     | 0.12     | 1.83e-05  | .998     | 7.07e-07 | 8.41e-04 | [-0.01,<br><0.01] |
| TOR_PSM_pd_stn_n275_coldspot_L   | -0.60    | -1.07e-04 | .671     | 1.68e-05 | 4.10e-03 | [-0.01,<br><0.01] |
| TOR_PSM_pd_stn_n275_coldspot_R   | -1.15    | -2.16e-04 | .456     | 6.23e-05 | 7.90e-03 | [-0.01,<br><0.01] |
| TOR_PSM_pd_stn_n275_hotspot_L    | -0.88    | -1.91e-04 | .520     | 3.64e-05 | 6.03e-03 | [-0.01,<br><0.01] |
| TOR_PSM_pd_stn_n275_hotspot_R    | -0.55    | -1.24e-04 | .640     | 1.43e-05 | 3.78e-03 | [-0.01,<br><0.01] |
| TOR_PSM_psych_scc_n76_coldspot_L | 0.04     | 1.11e-05  | 1.00     | 6.31e-08 | 2.51e-04 | [-0.01,<br><0.01] |
| TOR_PSM_psych_scc_n76_coldspot_R | -0.20    | -5.48e-05 | .925     | 1.89e-06 | 1.38e-03 | [-0.01,<br><0.01] |
| TOR_PSM_psych_scc_n76_hotspot_L  | -1.07    | -1.79e-04 | .347     | 5.38e-05 | 7.34e-03 | [-0.01,<br><0.01] |
| TOR_PSM_psych_scc_n76_hotspot_R  | -1.13    | -1.84e-04 | .282     | 6.03e-05 | 7.77e-03 | [-0.01,<br><0.01] |

**Table S11**

*ET PRS Associations with grey matter – mean diffusivity (MD) - LeadDBS\_Atlas\_compendium\_extended (Zhang’s 2017 substantia nigra segmentation)*

| Tract                              | <i>t</i> | $\beta$   | <i>p</i> | Eta2     | Cohens_f | 95% CI            |
|------------------------------------|----------|-----------|----------|----------|----------|-------------------|
| TOR_PSM_tremor_vim_n39_coldspot_L  | -0.86    | -1.46e-04 | .534     | 3.49e-05 | 5.91e-03 | [-0.01,<br><0.01] |
| TOR_PSM_tremor_vim_n39_coldspot_R  | -0.18    | -3.01e-05 | 1.00     | 1.51e-06 | 1.23e-03 | [-0.01,<br><0.01] |
| TOR_PSM_tremor_vim_n39_hotspot_L   | -0.69    | -8.93e-05 | .770     | 2.24e-05 | 4.73e-03 | [-0.01,<br><0.01] |
| TOR_PSM_tremor_vim_n39_hotspot_R   | -0.33    | -4.11e-05 | .908     | 5.03e-06 | 2.24e-03 | [-0.01,<br><0.01] |
| TOR_signPD_axial_signs_coldspot_L  | -0.33    | -5.27e-05 | 1.00     | 5.15e-06 | 2.27e-03 | [-0.01,<br><0.01] |
| TOR_signPD_axial_signs_coldspot_R  | -0.77    | -1.26e-04 | .810     | 2.77e-05 | 5.27e-03 | [-0.01,<br><0.01] |
| TOR_signPD_axial_signs_hotspot_L   | -0.95    | -2.00e-04 | .540     | 4.20e-05 | 6.48e-03 | [-0.01,<br><0.01] |
| TOR_signPD_axial_signs_hotspot_R   | -0.81    | -1.85e-04 | .513     | 3.05e-05 | 5.52e-03 | [-0.01,<br><0.01] |
| TOR_signPD_bradykinesia_coldspot_L | -0.58    | -1.03e-04 | .776     | 1.56e-05 | 3.95e-03 | [-0.01,<br><0.01] |
| TOR_signPD_bradykinesia_coldspot_R | -1.16    | -2.17e-04 | .544     | 6.28e-05 | 7.92e-03 | [-0.01,<br><0.01] |
| TOR_signPD_bradykinesia_hotspot_L  | -0.97    | -2.10e-04 | .523     | 4.40e-05 | 6.63e-03 | [-0.01,<br><0.01] |

**Table S11**

*ET PRS Associations with grey matter – mean diffusivity (MD) - LeadDBS\_Atlas\_compendium\_extended (Zhang's 2017 substantia nigra segmentation)*

| Tract                             | <i>t</i> | $\beta$   | <i>p</i> | Eta2     | Cohens_f | 95% CI            |
|-----------------------------------|----------|-----------|----------|----------|----------|-------------------|
| TOR_signPD_bradykinesia_hotspot_R | -0.36    | -8.37e-05 | .790     | 6.12e-06 | 2.47e-03 | [-0.01,<br><0.01] |
| TOR_signPD_rigidity_coldspot_L    | -0.55    | -8.76e-05 | .912     | 1.43e-05 | 3.78e-03 | [-0.01,<br><0.01] |
| TOR_signPD_rigidity_coldspot_R    | -0.97    | -1.60e-04 | .654     | 4.40e-05 | 6.64e-03 | [-0.01,<br><0.01] |
| TOR_signPD_rigidity_hotspot_L     | -0.41    | -7.87e-05 | .830     | 8.04e-06 | 2.84e-03 | [-0.01,<br><0.01] |
| TOR_signPD_rigidity_hotspot_R     | -0.66    | -1.36e-04 | .626     | 2.01e-05 | 4.49e-03 | [-0.01,<br><0.01] |
| TOR_signPD_tremor_coldspot_L      | -0.28    | -5.19e-05 | .854     | 3.78e-06 | 1.94e-03 | [-0.01,<br><0.01] |
| TOR_signPD_tremor_coldspot_R      | -0.81    | -1.49e-04 | .604     | 3.05e-05 | 5.52e-03 | [-0.01,<br><0.01] |
| TOR_signPD_tremor_hotspot_L       | -0.17    | -3.64e-05 | .955     | 1.29e-06 | 1.14e-03 | [-0.01,<br><0.01] |
| TOR_signPD_tremor_hotspot_R       | -0.66    | -1.53e-04 | .702     | 2.03e-05 | 4.51e-03 | [-0.01,<br><0.01] |
| Zona_Incerta_Atlas_cZI_L          | -0.75    | -1.30e-04 | .556     | 2.61e-05 | 5.11e-03 | [-0.01,<br><0.01] |
| Zona_Incerta_Atlas_cZI_R          | -0.86    | -1.48e-04 | .616     | 3.43e-05 | 5.86e-03 | [-0.01,<br><0.01] |

**Table S11**

*ET PRS Associations with grey matter – mean diffusivity (MD) - LeadDBS\_Atlas\_compendium\_extended (Zhang’s 2017 substantia nigra segmentation)*

| Tract                        | <i>t</i> | $\beta$   | <i>p</i> | Eta2     | Cohens_f | 95% CI            |
|------------------------------|----------|-----------|----------|----------|----------|-------------------|
| Zona_Incerta_Atlas_fct_L     | -0.48    | -8.97e-05 | .872     | 1.06e-05 | 3.26e-03 | [-0.01,<br><0.01] |
| Zona_Incerta_Atlas_fct_R     | -0.62    | -1.21e-04 | .656     | 1.79e-05 | 4.23e-03 | [-0.01,<br><0.01] |
| Zona_Incerta_Atlas_fl_L      | -0.02    | -4.79e-06 | 1.00     | 1.52e-08 | 1.23e-04 | [-0.01,<br><0.01] |
| Zona_Incerta_Atlas_fl_R      | -0.51    | -1.43e-04 | .750     | 1.20e-05 | 3.46e-03 | [-0.01,<br><0.01] |
| Zona_Incerta_Atlas_ft_L      | -0.40    | -9.52e-05 | .845     | 7.39e-06 | 2.72e-03 | [-0.01,<br><0.01] |
| Zona_Incerta_Atlas_ft_R      | -1.01    | -2.56e-04 | .575     | 4.76e-05 | 6.90e-03 | [-0.01,<br><0.01] |
| Zona_Incerta_Atlas_gm_mask   | -0.40    | -7.48e-05 | .838     | 7.68e-06 | 2.77e-03 | [-0.01,<br><0.01] |
| Zona_Incerta_Atlas_hf_L      | -0.43    | -1.15e-04 | .733     | 8.71e-06 | 2.95e-03 | [-0.01,<br><0.01] |
| Zona_Incerta_Atlas_hf_R      | -0.73    | -2.02e-04 | .607     | 2.47e-05 | 4.97e-03 | [-0.01,<br><0.01] |
| Zona_Incerta_Atlas_hfields_L | -0.27    | -6.72e-05 | .862     | 3.53e-06 | 1.88e-03 | [-0.01,<br><0.01] |
| Zona_Incerta_Atlas_hfields_R | -0.81    | -2.10e-04 | .578     | 3.05e-05 | 5.52e-03 | [-0.01,<br><0.01] |



**Table S11**

*ET PRS Associations with grey matter – mean diffusivity (MD) - LeadDBS\_Atlas\_compendium\_extended (Zhang’s 2017 substantia nigra segmentation)*

| Tract                     | <i>t</i> | $\beta$   | <i>p</i> | Eta2     | Cohens_f | 95% CI            |
|---------------------------|----------|-----------|----------|----------|----------|-------------------|
| Zona_Incerta_Atlas_ml_L   | 0.58     | 8.75e-05  | .783     | 1.57e-05 | 3.97e-03 | [-0.01,<br><0.01] |
| Zona_Incerta_Atlas_ml_R   | 0.16     | 2.31e-05  | 1.00     | 1.22e-06 | 1.10e-03 | [-0.01,<br><0.01] |
| Zona_Incerta_Atlas_rZI_L  | -0.16    | -4.02e-05 | .956     | 1.27e-06 | 1.13e-03 | [-0.01,<br><0.01] |
| Zona_Incerta_Atlas_rZI_R  | -0.64    | -1.67e-04 | .715     | 1.94e-05 | 4.41e-03 | [-0.01,<br><0.01] |
| Zona_Incerta_Atlas_ZI_L   | -0.34    | -7.13e-05 | .803     | 5.58e-06 | 2.36e-03 | [-0.01,<br><0.01] |
| Zona_Incerta_Atlas_ZI_R   | -0.74    | -1.61e-04 | .617     | 2.55e-05 | 5.05e-03 | [-0.01,<br><0.01] |
| Zona_Incerta_Atlas_zRN_L  | -0.39    | -7.61e-05 | .767     | 7.08e-06 | 2.66e-03 | [-0.01,<br><0.01] |
| Zona_Incerta_Atlas_zRN_R  | -0.61    | -1.21e-04 | .664     | 1.73e-05 | 4.16e-03 | [-0.01,<br><0.01] |
| Zona_Incerta_Atlas_zSTN_L | -0.72    | -1.76e-04 | .573     | 2.46e-05 | 4.96e-03 | [-0.01,<br><0.01] |
| Zona_Incerta_Atlas_zSTN_R | -0.66    | -1.68e-04 | .625     | 2.02e-05 | 4.50e-03 | [-0.01,<br><0.01] |

\* *p* < .05, \*\* *p* < .01, \*\*\* *p* < .001, 95% CI(B)

**Table S12*****ET PRS Associations with grey matter radial diffusivity (RD) - LeadDBS\_Atlas\_compendium\_extended***

| Tract                                                                         | <i>t</i> | $\beta$   | <i>p</i> | Eta2     | Cohens_f | 95% CI        |
|-------------------------------------------------------------------------------|----------|-----------|----------|----------|----------|---------------|
| Atlas_of_the_Human_Hypothalamus_anterior_commissure_L                         | -0.02    | -8.86e-05 | 1.00     | 1.90e-08 | 1.38e-04 | [-0.01, 0.01] |
| Atlas_of_the_Human_Hypothalamus_anterior_commissure_R                         | -0.57    | -2.44e-03 | .778     | 1.54e-05 | 3.93e-03 | [-0.01, 0.01] |
| Atlas_of_the_Human_Hypothalamus_anterior_hypothalamic_area_L                  | 0.32     | 1.67e-03  | .824     | 4.79e-06 | 2.19e-03 | [-0.01, 0.01] |
| Atlas_of_the_Human_Hypothalamus_anterior_hypothalamic_area_R                  | 0.43     | 2.27e-03  | .731     | 8.80e-06 | 2.97e-03 | [-0.01, 0.01] |
| Atlas_of_the_Human_Hypothalamus_arcuate_hypothalamic_nucleus_L                | 1.04     | 6.22e-03  | .387     | 5.06e-05 | 7.12e-03 | [-0.01, 0.02] |
| Atlas_of_the_Human_Hypothalamus_arcuate_hypothalamic_nucleus_R                | 1.69     | 1.01e-02  | .168     | 1.33e-04 | 1.15e-02 | [-0.01, 0.02] |
| Atlas_of_the_Human_Hypothalamus_bed_nucleus_of_the_stria_terminalis_L         | 0.77     | 3.58e-03  | .693     | 2.78e-05 | 5.28e-03 | [-0.01, 0.01] |
| Atlas_of_the_Human_Hypothalamus_bed_nucleus_of_the_stria_terminalis_R         | 1.01     | 4.79e-03  | .380     | 4.81e-05 | 6.94e-03 | [-0.01, 0.01] |
| Atlas_of_the_Human_Hypothalamus_diagonal_band_of_Broca_L                      | -0.43    | -2.14e-03 | .738     | 8.48e-06 | 2.91e-03 | [-0.01, 0.01] |
| Atlas_of_the_Human_Hypothalamus_diagonal_band_of_Broca_R                      | 0.05     | 2.49e-04  | 1.00     | 1.09e-07 | 3.30e-04 | [-0.01, 0.01] |
| Atlas_of_the_Human_Hypothalamus_dorsal_periventricular_hypothalamic_nucleus_L | -0.09    | -4.82e-04 | 1.00     | 3.88e-07 | 6.23e-04 | [-0.01, 0.01] |
| Atlas_of_the_Human_Hypothalamus_dorsal_periventricular_hypothalamic_nucleus_R | 0.25     | 1.36e-03  | .979     | 2.98e-06 | 1.73e-03 | [-0.01, 0.01] |
| Atlas_of_the_Human_Hypothalamus_dorsomedial_hypothalamic_nucleus_L            | 0.31     | 1.62e-03  | .835     | 4.40e-06 | 2.10e-03 | [-0.01, 0.01] |

**Table S12**

***ET PRS Associations with grey matter radial diffusivity (RD) - LeadDBS\_Atlas\_compendium\_extended***

| Tract                                                              | <i>t</i> | $\beta$   | <i>p</i> | Eta2     | Cohens_f | 95% CI        |
|--------------------------------------------------------------------|----------|-----------|----------|----------|----------|---------------|
| Atlas_of_the_Human_Hypothalamus_dorsomedial_hypothalamus_nucleus_R | 0.61     | 3.30e-03  | .596     | 1.74e-05 | 4.17e-03 | [-0.01, 0.01] |
| Atlas_of_the_Human_Hypothalamus_fornix_L                           | 1.16     | 5.53e-03  | .300     | 6.31e-05 | 7.95e-03 | [-0.01, 0.01] |
| Atlas_of_the_Human_Hypothalamus_fornix_R                           | -0.07    | -3.54e-04 | 1.00     | 2.48e-07 | 4.98e-04 | [-0.01, 0.01] |
| Atlas_of_the_Human_Hypothalamus_gm_mask                            | 0.40     | 1.66e-03  | .758     | 7.53e-06 | 2.74e-03 | [-0.01, 0.01] |
| Atlas_of_the_Human_Hypothalamus_inferior_thalamic_peduncle_L       | 0.26     | 1.34e-03  | .872     | 3.25e-06 | 1.80e-03 | [-0.01, 0.01] |
| Atlas_of_the_Human_Hypothalamus_inferior_thalamic_peduncle_R       | -0.26    | -1.39e-03 | .969     | 3.23e-06 | 1.80e-03 | [-0.01, 0.01] |
| Atlas_of_the_Human_Hypothalamus_lateral_hypothalamus_L             | 0.90     | 4.64e-03  | .519     | 3.84e-05 | 6.20e-03 | [-0.01, 0.01] |
| Atlas_of_the_Human_Hypothalamus_lateral_hypothalamus_R             | -0.18    | -9.10e-04 | .945     | 1.47e-06 | 1.21e-03 | [-0.01, 0.01] |
| Atlas_of_the_Human_Hypothalamus_mammillary_bodies_L                | 1.54     | 8.41e-03  | .170     | 1.11e-04 | 1.05e-02 | [-0.01, 0.02] |
| Atlas_of_the_Human_Hypothalamus_mammillary_bodies_R                | 1.46     | 8.07e-03  | .197     | 1.00e-04 | 1.00e-02 | [-0.01, 0.02] |
| Atlas_of_the_Human_Hypothalamus_mammillothalamic_tract_L           | 0.01     | 4.49e-05  | 1.00     | 4.06e-09 | 6.37e-05 | [-0.01, 0.01] |
| Atlas_of_the_Human_Hypothalamus_mammillothalamic_tract_R           | -0.44    | -2.14e-03 | .912     | 8.90e-06 | 2.98e-03 | [-0.01, 0.01] |
| Atlas_of_the_Human_Hypothalamus_medial_preoptic_nucleus_L          | -0.45    | -2.31e-03 | .798     | 9.50e-06 | 3.08e-03 | [-0.01, 0.01] |
| Atlas_of_the_Human_Hypothalamus_medial_preoptic_nucleus_R          | 0.44     | 2.38e-03  | .724     | 9.20e-06 | 3.03e-03 | [-0.01, 0.01] |
| Atlas_of_the_Human_Hypothalamus_nucleus_basalis_of_Meynert_L       | 0.21     | 9.61e-04  | .921     | 1.98e-06 | 1.41e-03 | [-0.01, 0.01] |

**Table S12**

***ET PRS Associations with grey matter radial diffusivity (RD) - LeadDBS\_Atlas\_compendium\_extended***

| Tract                                                                  | <i>t</i> | $\beta$   | <i>p</i> | Eta2     | Cohens_f | 95% CI         |
|------------------------------------------------------------------------|----------|-----------|----------|----------|----------|----------------|
| Atlas_of_the_Human_Hypothalamus_nucleus_basalis_of_Meynert_R           | -1.13    | -5.12e-03 | .374     | 5.96e-05 | 7.72e-03 | [-0.01, <0.01] |
| Atlas_of_the_Human_Hypothalamus_paraventricular_nucleus_L              | 0.29     | 1.55e-03  | .845     | 4.07e-06 | 2.02e-03 | [-0.01, 0.01]  |
| Atlas_of_the_Human_Hypothalamus_paraventricular_nucleus_R              | 1.29     | 7.29e-03  | .309     | 7.81e-05 | 8.84e-03 | [-0.01, 0.02]  |
| Atlas_of_the_Human_Hypothalamus_periventricular_hypothalamic_nucleus_L | 0.57     | 3.16e-03  | .625     | 1.53e-05 | 3.91e-03 | [-0.01, 0.01]  |
| Atlas_of_the_Human_Hypothalamus_periventricular_hypothalamic_nucleus_R | 1.89     | 1.07e-02  | .069     | 1.68e-04 | 1.30e-02 | [-0.01, 0.02]  |
| Atlas_of_the_Human_Hypothalamus_posterior_hypothalamic_nucleus_L       | 0.23     | 1.23e-03  | .998     | 2.52e-06 | 1.59e-03 | [-0.01, 0.01]  |
| Atlas_of_the_Human_Hypothalamus_posterior_hypothalamic_nucleus_R       | 0.52     | 2.87e-03  | .733     | 1.29e-05 | 3.59e-03 | [-0.01, 0.01]  |
| Atlas_of_the_Human_Hypothalamus_red_nucleus_L                          | -0.65    | -2.98e-03 | .808     | 2.00e-05 | 4.47e-03 | [-0.01, 0.01]  |
| Atlas_of_the_Human_Hypothalamus_red_nucleus_R                          | -1.13    | -5.22e-03 | .494     | 6.00e-05 | 7.75e-03 | [-0.01, <0.01] |
| Atlas_of_the_Human_Hypothalamus_substantia_nigra_L                     | 0.40     | 1.93e-03  | .758     | 7.52e-06 | 2.74e-03 | [-0.01, 0.01]  |
| Atlas_of_the_Human_Hypothalamus_substantia_nigra_R                     | -0.07    | -3.07e-04 | 1.00     | 2.01e-07 | 4.48e-04 | [-0.01, 0.01]  |
| Atlas_of_the_Human_Hypothalamus_subthalamic_nucleus_L                  | -0.33    | -1.70e-03 | .910     | 4.99e-06 | 2.23e-03 | [-0.01, 0.01]  |
| Atlas_of_the_Human_Hypothalamus_subthalamic_nucleus_R                  | -0.14    | -7.49e-04 | .974     | 9.70e-07 | 9.85e-04 | [-0.01, 0.01]  |
| Atlas_of_the_Human_Hypothalamus_suprachiasmatic_hypothalamic_nucleus_L | -0.19    | -1.14e-03 | .934     | 1.70e-06 | 1.30e-03 | [-0.01, 0.01]  |

**Table S12**

***ET PRS Associations with grey matter radial diffusivity (RD) - LeadDBS\_Atlas\_compendium\_extended***

| Tract                                                                   | <i>t</i> | $\beta$   | <i>p</i> | Eta2     | Cohens_f | 95% CI         |
|-------------------------------------------------------------------------|----------|-----------|----------|----------|----------|----------------|
| Atlas_of_the_Human_Hypothalamus_suprachiasmatic_hypothalamic_nucleus_R  | 0.92     | 5.51e-03  | .435     | 3.99e-05 | 6.32e-03 | [-0.01, 0.02]  |
| Atlas_of_the_Human_Hypothalamus_supraoptic_hypothalamic_nucleus_L       | 0.33     | 1.79e-03  | .816     | 5.09e-06 | 2.26e-03 | [-0.01, 0.01]  |
| Atlas_of_the_Human_Hypothalamus_supraoptic_hypothalamic_nucleus_R       | 0.64     | 3.50e-03  | .685     | 1.92e-05 | 4.38e-03 | [-0.01, 0.01]  |
| Atlas_of_the_Human_Hypothalamus_tuberomammillary_hypothalamic_nucleus_L | 1.46     | 8.06e-03  | .197     | 1.00e-04 | 1.00e-02 | [-0.01, 0.02]  |
| Atlas_of_the_Human_Hypothalamus_tuberomammillary_hypothalamic_nucleus_R | 0.75     | 4.09e-03  | .679     | 2.64e-05 | 5.14e-03 | [-0.01, 0.01]  |
| Atlas_of_the_Human_Hypothalamus_ventromedial_hypothalamic_nucleus_L     | 0.73     | 3.96e-03  | .573     | 2.46e-05 | 4.96e-03 | [-0.01, 0.01]  |
| Atlas_of_the_Human_Hypothalamus_ventromedial_hypothalamic_nucleus_R     | 0.83     | 4.54e-03  | .495     | 3.25e-05 | 5.70e-03 | [-0.01, 0.02]  |
| Atlas_of_the_Human_Hypothalamus_zona_incerta_L                          | -0.62    | -3.18e-03 | .740     | 1.78e-05 | 4.21e-03 | [-0.01, 0.01]  |
| Atlas_of_the_Human_Hypothalamus_zona_incerta_R                          | -0.71    | -3.70e-03 | .602     | 2.37e-05 | 4.87e-03 | [-0.01, 0.01]  |
| Brainstem_Connectome_Atlas_CST_L                                        | 0.86     | 3.77e-03  | .536     | 3.47e-05 | 5.89e-03 | [-0.01, 0.01]  |
| Brainstem_Connectome_Atlas_CST_R                                        | 0.45     | 1.92e-03  | .820     | 9.67e-06 | 3.11e-03 | [-0.01, 0.01]  |
| Brainstem_Connectome_Atlas_FPT_L                                        | 1.57     | 7.45e-03  | .215     | 1.15e-04 | 1.07e-02 | [-0.01, 0.02]  |
| Brainstem_Connectome_Atlas_FPT_R                                        | 1.32     | 6.23e-03  | .293     | 8.19e-05 | 9.05e-03 | [-0.01, 0.02]  |
| Brainstem_Connectome_Atlas_gm_mask                                      | 0.13     | 4.56e-04  | .988     | 7.66e-07 | 8.75e-04 | [-0.01, 0.01]  |
| Brainstem_Connectome_Atlas_ICPMC_L                                      | -0.40    | -1.33e-03 | .761     | 7.35e-06 | 2.71e-03 | [-0.01, 0.01]  |
| Brainstem_Connectome_Atlas_ICPMC_R                                      | -0.58    | -1.94e-03 | .649     | 1.59e-05 | 3.98e-03 | [-0.01, <0.01] |

**Table S12**

***ET PRS Associations with grey matter radial diffusivity (RD) - LeadDBS\_Atlas\_compendium\_extended***

| Tract                              | <i>t</i> | $\beta$   | <i>p</i> | Eta2     | Cohens_f | 95% CI         |
|------------------------------------|----------|-----------|----------|----------|----------|----------------|
| Brainstem_Connectome_Atlas_ICPVC_L | -0.36    | -1.15e-03 | .877     | 6.12e-06 | 2.47e-03 | [-0.01, 0.01]  |
| Brainstem_Connectome_Atlas_ICPVC_R | -0.63    | -2.06e-03 | .579     | 1.88e-05 | 4.33e-03 | [-0.01, <0.01] |
| Brainstem_Connectome_Atlas_LL_L    | 1.07     | 4.69e-03  | .389     | 5.40e-05 | 7.35e-03 | [-0.01, 0.01]  |
| Brainstem_Connectome_Atlas_LL_R    | -0.11    | -4.39e-04 | 1.00     | 5.39e-07 | 7.34e-04 | [-0.01, 0.01]  |
| Brainstem_Connectome_Atlas_MCP_M   | 0.35     | 1.12e-03  | .845     | 5.89e-06 | 2.43e-03 | [-0.01, 0.01]  |
| Brainstem_Connectome_Atlas_ML_L    | 0.25     | 8.55e-04  | .885     | 2.88e-06 | 1.70e-03 | [-0.01, 0.01]  |
| Brainstem_Connectome_Atlas_ML_R    | 0.20     | 6.68e-04  | .926     | 1.88e-06 | 1.37e-03 | [-0.01, 0.01]  |
| Brainstem_Connectome_Atlas_POTPT_L | 0.62     | 2.68e-03  | .591     | 1.78e-05 | 4.22e-03 | [-0.01, 0.01]  |
| Brainstem_Connectome_Atlas_POTPT_R | 0.11     | 4.38e-04  | 1.00     | 5.22e-07 | 7.23e-04 | [-0.01, 0.01]  |
| Brainstem_Connectome_Atlas_SCPCR_L | -0.88    | -2.43e-03 | .518     | 3.66e-05 | 6.05e-03 | [-0.01, <0.01] |
| Brainstem_Connectome_Atlas_SCPCR_R | -0.58    | -1.64e-03 | .686     | 1.58e-05 | 3.98e-03 | [-0.01, <0.01] |
| Brainstem_Connectome_Atlas_SCPCT_L | -0.64    | -1.81e-03 | .715     | 1.94e-05 | 4.41e-03 | [-0.01, <0.01] |
| Brainstem_Connectome_Atlas_SCPCT_R | -0.48    | -1.35e-03 | .773     | 1.07e-05 | 3.28e-03 | [-0.01, <0.01] |
| Brainstem_Connectome_Atlas_SCPSC_L | 0.46     | 2.01e-03  | .712     | 9.81e-06 | 3.13e-03 | [-0.01, 0.01]  |
| Brainstem_Connectome_Atlas_SCPSC_R | -0.23    | -8.94e-04 | .903     | 2.41e-06 | 1.55e-03 | [-0.01, 0.01]  |
| Brainstem_Connectome_Atlas_STT_L   | 0.49     | 2.00e-03  | .683     | 1.15e-05 | 3.39e-03 | [-0.01, 0.01]  |
| Brainstem_Connectome_Atlas_STT_R   | 0.24     | 8.38e-04  | .926     | 2.71e-06 | 1.65e-03 | [-0.01, 0.01]  |
| DBS_targets_AD_FORNIX_L            | -0.04    | -1.96e-04 | 1.00     | 7.52e-08 | 2.74e-04 | [-0.01, 0.01]  |
| DBS_targets_AD_FORNIX_R            | 0.40     | 1.95e-03  | .761     | 7.34e-06 | 2.71e-03 | [-0.01, 0.01]  |

**Table S12**

***ET PRS Associations with grey matter radial diffusivity (RD) - LeadDBS\_Atlas\_compendium\_extended***

| Tract                                    | <i>t</i> | $\beta$   | <i>p</i> | Eta2     | Cohens_f | 95% CI            |
|------------------------------------------|----------|-----------|----------|----------|----------|-------------------|
| DBS_targets_ADD_NAc_L                    | -0.19    | -1.06e-03 | .984     | 1.78e-06 | 1.33e-03 | [-0.01, 0.01]     |
| DBS_targets_ADD_NAc_R                    | -0.46    | -2.47e-03 | .711     | 9.86e-06 | 3.14e-03 | [-0.01, 0.01]     |
| DBS_targets_Dyt_GPi_L                    | 1.16     | 5.19e-03  | .485     | 6.26e-05 | 7.91e-03 | [-0.01, 0.01]     |
| DBS_targets_Dyt_GPi_R                    | 0.60     | 2.60e-03  | .671     | 1.69e-05 | 4.11e-03 | [-0.01, 0.01]     |
| DBS_targets_ET_VIM_L                     | 0.01     | 5.02e-05  | 1.00     | 7.68e-09 | 8.76e-05 | [-0.01, 0.01]     |
| DBS_targets_ET_VIM_R                     | 0.04     | 1.62e-04  | 1.00     | 7.96e-08 | 2.82e-04 | [-0.01, 0.01]     |
| DBS_targets_MD_SCC_L                     | -1.44    | -5.53e-03 | .193     | 9.72e-05 | 9.86e-03 | [-0.01,<br><0.01] |
| DBS_targets_MD_SCC_R                     | -0.90    | -3.53e-03 | .449     | 3.81e-05 | 6.17e-03 | [-0.01,<br><0.01] |
| DBS_targets_OCD_ALIC_L                   | 0.68     | 2.93e-03  | .609     | 2.15e-05 | 4.64e-03 | [-0.01, 0.01]     |
| DBS_targets_OCD_ALIC_R                   | 0.59     | 2.49e-03  | .614     | 1.60e-05 | 4.01e-03 | [-0.01, 0.01]     |
| DBS_targets_OCD_NAc_L                    | -0.52    | -2.64e-03 | .711     | 1.26e-05 | 3.54e-03 | [-0.01, 0.01]     |
| DBS_targets_OCD_NAc_R                    | -0.76    | -3.99e-03 | .612     | 2.73e-05 | 5.23e-03 | [-0.01, 0.01]     |
| DBS_targets_PD_STN_L                     | -1.29    | -6.43e-03 | .364     | 7.74e-05 | 8.80e-03 | [-0.02,<br><0.01] |
| DBS_targets_PD_STN_R                     | -0.51    | -2.64e-03 | .679     | 1.23e-05 | 3.51e-03 | [-0.01, 0.01]     |
| DBS_targets_TS_CMPVVOI_L                 | -0.11    | -5.10e-04 | 1.00     | 5.42e-07 | 7.36e-04 | [-0.01, 0.01]     |
| DBS_targets_TS_CMPVVOI_R                 | -0.68    | -3.34e-03 | .547     | 2.16e-05 | 4.65e-03 | [-0.01, 0.01]     |
| DBS_Tractography_Atlas_Ca                | 1.62     | 7.53e-03  | .129     | 1.23e-04 | 1.11e-02 | [-0.01, 0.02]     |
| DBS_Tractography_Atlas_EXA               | 0.97     | 4.16e-03  | .523     | 4.39e-05 | 6.63e-03 | [-0.01, 0.01]     |
| DBS_Tractography_Atlas_HN                | 1.68     | 9.07e-03  | .127     | 1.33e-04 | 1.15e-02 | [-0.01, 0.02]     |
| DBS_Tractography_Atlas_HTH               | 0.61     | 2.90e-03  | .595     | 1.75e-05 | 4.18e-03 | [-0.01, 0.01]     |
| DBS_Tractography_Atlas_L_STN_associative | -0.68    | -3.68e-03 | .610     | 2.14e-05 | 4.63e-03 | [-0.01, 0.01]     |

**Table S12**

***ET PRS Associations with grey matter radial diffusivity (RD) - LeadDBS\_Atlas\_compendium\_extended***

| Tract                                                                             | <i>t</i> | $\beta$   | <i>p</i> | Eta2     | Cohens_f | 95% CI         |
|-----------------------------------------------------------------------------------|----------|-----------|----------|----------|----------|----------------|
| DBS_Tractography_Atlas_L_STN_limbic                                               | -0.19    | -1.00e-03 | .936     | 1.66e-06 | 1.29e-03 | [-0.01, 0.01]  |
| DBS_Tractography_Atlas_L_STN_motor                                                | -1.31    | -6.56e-03 | .410     | 8.03e-05 | 8.96e-03 | [-0.02, <0.01] |
| DBS_Tractography_Atlas_MN                                                         | 1.55     | 8.24e-03  | .192     | 1.12e-04 | 1.06e-02 | [-0.01, 0.02]  |
| DBS_Tractography_Atlas_NAC                                                        | -0.24    | -1.01e-03 | .977     | 2.75e-06 | 1.66e-03 | [-0.01, 0.01]  |
| DBS_Tractography_Atlas_PBP                                                        | -0.54    | -2.25e-03 | .928     | 1.36e-05 | 3.69e-03 | [-0.01, 0.01]  |
| DBS_Tractography_Atlas_Pu                                                         | 0.76     | 2.34e-03  | .612     | 2.73e-05 | 5.23e-03 | [-0.01, 0.01]  |
| DBS_Tractography_Atlas_R_STN_associative                                          | -0.57    | -3.10e-03 | .692     | 1.54e-05 | 3.93e-03 | [-0.01, 0.01]  |
| DBS_Tractography_Atlas_R_STN_limbic                                               | -0.40    | -2.19e-03 | .844     | 7.41e-06 | 2.72e-03 | [-0.01, 0.01]  |
| DBS_Tractography_Atlas_R_STN_motor                                                | -0.30    | -1.49e-03 | .844     | 4.10e-06 | 2.02e-03 | [-0.01, 0.01]  |
| DBS_Tractography_Atlas_SNc                                                        | -0.17    | -7.32e-04 | .951     | 1.37e-06 | 1.17e-03 | [-0.01, 0.01]  |
| DBS_Tractography_Atlas_SNr                                                        | 0.21     | 9.80e-04  | 1.00     | 2.07e-06 | 1.44e-03 | [-0.01, 0.01]  |
| DBS_Tractography_Atlas_VeP                                                        | -0.24    | -1.21e-03 | .892     | 2.78e-06 | 1.67e-03 | [-0.01, 0.01]  |
| DBS_Tractography_Atlas_VTA                                                        | 0.14     | 5.98e-04  | .980     | 8.75e-07 | 9.35e-04 | [-0.01, 0.01]  |
| Dystonia_Response_Tract_Atlas_Sweetspot_cervical_L                                | 1.03     | 3.97e-03  | .553     | 5.00e-05 | 7.07e-03 | [-0.01, 0.01]  |
| Dystonia_Response_Tract_Atlas_Sweetspot_cervical_R                                | -0.12    | -4.29e-04 | 1.00     | 6.35e-07 | 7.97e-04 | [-0.01, 0.01]  |
| Dystonia_Response_Tract_Atlas_Sweetspot_generalized_L                             | 0.89     | 3.39e-03  | .661     | 3.67e-05 | 6.06e-03 | [-0.01, 0.01]  |
| Dystonia_Response_Tract_Atlas_Sweetspot_generalized_R                             | 0.19     | 7.23e-04  | 1.00     | 1.75e-06 | 1.32e-03 | [-0.01, 0.01]  |
| Nigral_O'Donnell Research Group<br>(ORG)anization_atlas_lateral_SNc_somatomotor_L | -0.01    | -3.28e-05 | 1.00     | 2.20e-09 | 4.69e-05 | [-0.01, 0.01]  |
| Nigral_O'Donnell Research Group<br>(ORG)anization_atlas_lateral_SNc_somatomotor_R | -0.82    | -4.02e-03 | .505     | 3.14e-05 | 5.60e-03 | [-0.01, 0.01]  |
| Nigral_O'Donnell Research Group<br>(ORG)anization_atlas_medial_SNc_limbic_L       | 0.32     | 1.54e-03  | .915     | 4.80e-06 | 2.19e-03 | [-0.01, 0.01]  |



**Table S12**

***ET PRS Associations with grey matter radial diffusivity (RD) - LeadDBS\_Atlas\_compendium\_extended***

| Tract                                                                            | <i>t</i> | $\beta$   | <i>p</i> | Eta2     | Cohens_f | 95% CI            |
|----------------------------------------------------------------------------------|----------|-----------|----------|----------|----------|-------------------|
| Nigral_O'Donnell Research Group<br>(ORG)anization_atlas_medial_SNc_limbic_R      | -0.79    | -3.85e-03 | .576     | 2.90e-05 | 5.39e-03 | [-0.01, 0.01]     |
| Nigral_O'Donnell Research Group<br>(ORG)anization_atlas_ventral_SN_associative_L | 0.45     | 2.25e-03  | .809     | 9.54e-06 | 3.09e-03 | [-0.01, 0.01]     |
| Nigral_O'Donnell Research Group<br>(ORG)anization_atlas_ventral_SN_associative_R | -0.42    | -2.14e-03 | .928     | 8.24e-06 | 2.87e-03 | [-0.01, 0.01]     |
| Striatal_Functional_Networks_17Networks_1                                        | -1.02    | -4.03e-03 | .337     | 4.91e-05 | 7.01e-03 | [-0.01,<br><0.01] |
| Striatal_Functional_Networks_17Networks_10                                       | -0.05    | -1.97e-04 | 1.00     | 1.18e-07 | 3.44e-04 | [-0.01, 0.01]     |
| Striatal_Functional_Networks_17Networks_12                                       | -0.01    | -1.22e-05 | 1.00     | 6.04e-10 | 2.46e-05 | [-0.01, 0.01]     |
| Striatal_Functional_Networks_17Networks_13                                       | 1.45     | 7.91e-03  | .161     | 9.88e-05 | 9.94e-03 | [-0.01, 0.02]     |
| Striatal_Functional_Networks_17Networks_14                                       | 2.15     | 7.80e-03  | .058     | 2.16e-04 | 1.47e-02 | [<0.01, 0.01]     |
| Striatal_Functional_Networks_17Networks_16                                       | 1.07     | 5.46e-03  | .311     | 5.41e-05 | 7.36e-03 | [-0.01, 0.02]     |
| Striatal_Functional_Networks_17Networks_17                                       | 1.53     | 6.99e-03  | .155     | 1.09e-04 | 1.04e-02 | [-0.01, 0.02]     |
| Striatal_Functional_Networks_17Networks_3                                        | 1.48     | 4.80e-03  | .217     | 1.03e-04 | 1.02e-02 | [-0.01, 0.01]     |
| Striatal_Functional_Networks_17Networks_4                                        | 0.47     | 1.65e-03  | .781     | 1.03e-05 | 3.21e-03 | [-0.01, 0.01]     |
| Striatal_Functional_Networks_17Networks_6                                        | -0.25    | -9.64e-04 | .884     | 2.89e-06 | 1.70e-03 | [-0.01, 0.01]     |
| Striatal_Functional_Networks_17Networks_7                                        | 1.22     | 4.19e-03  | .270     | 7.03e-05 | 8.39e-03 | [-0.01, 0.01]     |
| Striatal_Functional_Networks_17Networks_8                                        | 1.16     | 3.84e-03  | .271     | 6.31e-05 | 7.94e-03 | [-0.01, 0.01]     |
| Striatal_Functional_Networks_17Networks_9                                        | -0.24    | -8.96e-04 | .894     | 2.63e-06 | 1.62e-03 | [-0.01, 0.01]     |
| Striatal_Functional_Networks_7Networks_1                                         | -1.02    | -4.03e-03 | .337     | 4.91e-05 | 7.01e-03 | [-0.01,<br><0.01] |
| Striatal_Functional_Networks_7Networks_2                                         | 1.13     | 3.65e-03  | .354     | 6.02e-05 | 7.76e-03 | [-0.01, 0.01]     |
| Striatal_Functional_Networks_7Networks_3                                         | -0.40    | -1.45e-03 | .755     | 7.65e-06 | 2.77e-03 | [-0.01, 0.01]     |

Table S12

*ET PRS Associations with grey matter radial diffusivity (RD) - LeadDBS\_Atlas\_compendium\_extended*

| Tract                                    | <i>t</i>    | $\beta$         | <i>p</i>    | Eta2            | Cohens_f        | 95% CI                 |
|------------------------------------------|-------------|-----------------|-------------|-----------------|-----------------|------------------------|
| Striatal_Functional_Networks_7Networks_4 | 1.30        | 4.30e-03        | .265        | 7.94e-05        | 8.91e-03        | [-0.01, 0.01]          |
| Striatal_Functional_Networks_7Networks_5 | -0.09       | -3.44e-04       | 1.00        | 3.59e-07        | 5.99e-04        | [-0.01, 0.01]          |
| Striatal_Functional_Networks_7Networks_6 | 1.33        | 5.34e-03        | .201        | 8.33e-05        | 9.13e-03        | [-0.01, 0.01]          |
| Striatal_Functional_Networks_7Networks_7 | 1.21        | 6.16e-03        | .249        | 6.87e-05        | 8.29e-03        | [-0.01, 0.02]          |
| Thalamic_Functional_Atlas_1_L            | -0.50       | -1.72e-03       | .679        | 1.17e-05        | 3.42e-03        | [-0.01, 0.01]          |
| Thalamic_Functional_Atlas_1_R            | -0.50       | -1.72e-03       | .679        | 1.17e-05        | 3.42e-03        | [-0.01, 0.01]          |
| Thalamic_Functional_Atlas_10_L           | 1.73        | 7.56e-03        | .115        | 1.40e-04        | 1.18e-02        | [-0.01, 0.02]          |
| Thalamic_Functional_Atlas_10_R           | 0.05        | 1.73e-04        | 1.00        | 1.03e-07        | 3.20e-04        | [-0.01, 0.01]          |
| Thalamic_Functional_Atlas_11_L           | 2.03        | 8.80e-03        | .078        | 1.92e-04        | 1.39e-02        | <0.01, 0.02]           |
| Thalamic_Functional_Atlas_11_R           | 1.82        | 8.46e-03        | .094        | 1.56e-04        | 1.25e-02        | [-0.01, 0.02]          |
| Thalamic_Functional_Atlas_12_L           | 0.44        | 2.33e-03        | .723        | 9.20e-06        | 3.03e-03        | [-0.01, 0.01]          |
| Thalamic_Functional_Atlas_12_R           | 0.52        | 2.60e-03        | .665        | 1.25e-05        | 3.54e-03        | [-0.01, 0.01]          |
| Thalamic_Functional_Atlas_13_R           | 0.37        | 1.48e-03        | .869        | 6.43e-06        | 2.54e-03        | [-0.01, 0.01]          |
| <b>Thalamic_Functional_Atlas_13A_L</b>   | <b>2.60</b> | <b>1.05e-02</b> | <b>.012</b> | <b>3.16e-04</b> | <b>1.78e-02</b> | <b>&lt;0.01, 0.02]</b> |
| Thalamic_Functional_Atlas_13B_L          | -0.64       | -2.32e-03       | .634        | 1.91e-05        | 4.37e-03        | [-0.01, <0.01]         |
| <b>Thalamic_Functional_Atlas_14_L</b>    | <b>2.51</b> | <b>1.47e-02</b> | <b>.017</b> | <b>2.95e-04</b> | <b>1.72e-02</b> | <b>&lt;0.01, 0.03]</b> |
| <b>Thalamic_Functional_Atlas_14_R</b>    | <b>2.12</b> | <b>1.24e-02</b> | <b>.047</b> | <b>2.11e-04</b> | <b>1.45e-02</b> | <b>&lt;0.01, 0.02]</b> |
| Thalamic_Functional_Atlas_15_L           | 1.24        | 4.19e-03        | .336        | 7.24e-05        | 8.51e-03        | [-0.01, 0.01]          |
| <b>Thalamic_Functional_Atlas_15_R</b>    | <b>2.15</b> | <b>8.39e-03</b> | <b>.049</b> | <b>2.17e-04</b> | <b>1.47e-02</b> | <b>&lt;0.01, 0.02]</b> |
| Thalamic_Functional_Atlas_2_L            | 0.38        | 1.37e-03        | .856        | 6.93e-06        | 2.63e-03        | [-0.01, 0.01]          |
| Thalamic_Functional_Atlas_2_R            | 0.46        | 1.61e-03        | .712        | 9.81e-06        | 3.13e-03        | [-0.01, 0.01]          |
| <b>Thalamic_Functional_Atlas_3_R</b>     | <b>2.34</b> | <b>9.07e-03</b> | <b>.024</b> | <b>2.56e-04</b> | <b>1.60e-02</b> | <b>&lt;0.01, 0.02]</b> |
| Thalamic_Functional_Atlas_4_R            | 1.69        | 5.99e-03        | .124        | 1.34e-04        | 1.16e-02        | [-0.01, 0.01]          |

**Table S12**

***ET PRS Associations with grey matter radial diffusivity (RD) - LeadDBS\_Atlas\_compendium\_extended***

| Tract                                 | <i>t</i>    | $\beta$         | <i>p</i>    | Eta2            | Cohens_f        | 95% CI                 |
|---------------------------------------|-------------|-----------------|-------------|-----------------|-----------------|------------------------|
| Thalamic_Functional_Atlas_4A_L        | -0.35       | -1.25e-03       | .795        | 5.89e-06        | 2.43e-03        | [-0.01, 0.01]          |
| <b>Thalamic_Functional_Atlas_4B_L</b> | <b>2.18</b> | <b>8.59e-03</b> | <b>.036</b> | <b>2.22e-04</b> | <b>1.49e-02</b> | <b>&lt;0.01, 0.02]</b> |
| Thalamic_Functional_Atlas_5_R         | 1.71        | 9.40e-03        | .159        | 1.38e-04        | 1.17e-02        | [-0.01, 0.02]          |
| Thalamic_Functional_Atlas_6_L         | 1.23        | 5.78e-03        | .269        | 7.04e-05        | 8.39e-03        | [-0.01, 0.02]          |
| Thalamic_Functional_Atlas_6_R         | 0.11        | 5.49e-04        | 1.00        | 6.04e-07        | 7.77e-04        | [-0.01, 0.01]          |
| <b>Thalamic_Functional_Atlas_7_L</b>  | <b>2.49</b> | <b>1.26e-02</b> | <b>.020</b> | <b>2.90e-04</b> | <b>1.70e-02</b> | <b>&lt;0.01, 0.02]</b> |
| Thalamic_Functional_Atlas_7_R         | 1.89        | 9.42e-03        | .065        | 1.67e-04        | 1.29e-02        | [-0.01, 0.02]          |
| Thalamic_Functional_Atlas_8_L         | 0.64        | 1.88e-03        | .636        | 1.94e-05        | 4.40e-03        | [-0.01, 0.01]          |
| Thalamic_Functional_Atlas_8_R         | 0.73        | 2.35e-03        | .567        | 2.51e-05        | 5.01e-03        | [-0.01, 0.01]          |
| Thalamic_Functional_Atlas_9_R         | 1.76        | 9.45e-03        | .143        | 1.46e-04        | 1.21e-02        | [-0.01, 0.02]          |
| Thalamic_Functional_Atlas_9A_L        | 1.72        | 9.06e-03        | .117        | 1.39e-04        | 1.18e-02        | [-0.01, 0.02]          |
| Thalamic_Functional_Atlas_9B_L        | 1.91        | 1.04e-02        | .102        | 1.72e-04        | 1.31e-02        | [-0.01, 0.02]          |
| TOR_PSM_dystonia_gpi_n64_coldspot_L   | 0.66        | 2.53e-03        | .561        | 2.03e-05        | 4.51e-03        | [-0.01, 0.01]          |
| TOR_PSM_dystonia_gpi_n64_coldspot_R   | -0.06       | -2.21e-04       | 1.00        | 1.63e-07        | 4.03e-04        | [-0.01, 0.01]          |
| TOR_PSM_dystonia_gpi_n64_hotspot_L    | 0.90        | 3.23e-03        | .579        | 3.79e-05        | 6.16e-03        | [-0.01, 0.01]          |
| TOR_PSM_dystonia_gpi_n64_hotspot_R    | -0.11       | -3.90e-04       | 1.00        | 5.91e-07        | 7.69e-04        | [-0.01, 0.01]          |
| TOR_PSM_pd_gpi_n28_coldspot_L         | 0.96        | 4.15e-03        | .414        | 4.30e-05        | 6.55e-03        | [-0.01, 0.01]          |
| TOR_PSM_pd_gpi_n28_coldspot_R         | -0.65       | -2.67e-03       | .670        | 1.96e-05        | 4.42e-03        | [-0.01, 0.01]          |
| TOR_PSM_pd_gpi_n28_hotspot_L          | 0.93        | 3.63e-03        | .544        | 4.08e-05        | 6.39e-03        | [-0.01, 0.01]          |
| TOR_PSM_pd_gpi_n28_hotspot_R          | 0.25        | 9.50e-04        | .879        | 3.03e-06        | 1.74e-03        | [-0.01, 0.01]          |
| TOR_PSM_pd_stn_n275_coldspot_L        | -0.53       | -2.24e-03       | .818        | 1.33e-05        | 3.64e-03        | [-0.01, 0.01]          |
| TOR_PSM_pd_stn_n275_coldspot_R        | -1.30       | -5.68e-03       | .354        | 7.94e-05        | 8.91e-03        | [-0.01, <0.01]         |
| TOR_PSM_pd_stn_n275_hotspot_L         | -0.82       | -4.00e-03       | .651        | 3.13e-05        | 5.59e-03        | [-0.01, 0.01]          |

**Table S12**

***ET PRS Associations with grey matter radial diffusivity (RD) - LeadDBS\_Atlas\_compendium\_extended***

| Tract                              | <i>t</i> | $\beta$   | <i>p</i> | Eta2     | Cohens_f | 95% CI         |
|------------------------------------|----------|-----------|----------|----------|----------|----------------|
| TOR_PSM_pd_stn_n275_hotspot_R      | -0.40    | -1.97e-03 | .791     | 7.37e-06 | 2.71e-03 | [-0.01, 0.01]  |
| TOR_PSM_psych_scc_n76_coldspot_L   | 0.10     | 5.32e-04  | 1.00     | 4.46e-07 | 6.68e-04 | [-0.01, 0.01]  |
| TOR_PSM_psych_scc_n76_coldspot_R   | -0.14    | -7.14e-04 | .980     | 8.82e-07 | 9.39e-04 | [-0.01, 0.01]  |
| TOR_PSM_psych_scc_n76_hotspot_L    | -1.05    | -4.22e-03 | .359     | 5.17e-05 | 7.19e-03 | [-0.01, <0.01] |
| TOR_PSM_psych_scc_n76_hotspot_R    | -1.03    | -4.05e-03 | .334     | 4.96e-05 | 7.04e-03 | [-0.01, <0.01] |
| TOR_PSM_tremor_vim_n39_coldspot_L  | -1.21    | -5.02e-03 | .396     | 6.81e-05 | 8.25e-03 | [-0.01, <0.01] |
| TOR_PSM_tremor_vim_n39_coldspot_R  | -0.55    | -2.25e-03 | .911     | 1.40e-05 | 3.74e-03 | [-0.01, 0.01]  |
| TOR_PSM_tremor_vim_n39_hotspot_L   | -0.88    | -2.98e-03 | .462     | 3.64e-05 | 6.04e-03 | [-0.01, <0.01] |
| TOR_PSM_tremor_vim_n39_hotspot_R   | -0.61    | -2.00e-03 | .659     | 1.76e-05 | 4.20e-03 | [-0.01, <0.01] |
| TOR_signPD_axial_signs_coldspot_L  | -0.17    | -6.70e-04 | 1.00     | 1.39e-06 | 1.18e-03 | [-0.01, 0.01]  |
| TOR_signPD_axial_signs_coldspot_R  | -0.91    | -3.63e-03 | .497     | 3.91e-05 | 6.25e-03 | [-0.01, <0.01] |
| TOR_signPD_axial_signs_hotspot_L   | -0.76    | -3.70e-03 | .699     | 2.73e-05 | 5.23e-03 | [-0.01, 0.01]  |
| TOR_signPD_axial_signs_hotspot_R   | -0.61    | -3.04e-03 | .823     | 1.72e-05 | 4.15e-03 | [-0.01, 0.01]  |
| TOR_signPD_bradykinesia_coldspot_L | -0.48    | -1.99e-03 | .755     | 1.06e-05 | 3.25e-03 | [-0.01, 0.01]  |
| TOR_signPD_bradykinesia_coldspot_R | -1.29    | -5.61e-03 | .310     | 7.79e-05 | 8.83e-03 | [-0.01, <0.01] |
| TOR_signPD_bradykinesia_hotspot_L  | -0.90    | -4.47e-03 | .575     | 3.83e-05 | 6.19e-03 | [-0.01, 0.01]  |
| TOR_signPD_bradykinesia_hotspot_R  | -0.23    | -1.19e-03 | .896     | 2.58e-06 | 1.61e-03 | [-0.01, 0.01]  |

**Table S12**

***ET PRS Associations with grey matter radial diffusivity (RD) - LeadDBS\_Atlas\_compendium\_extended***

| Tract                          | <i>t</i> | $\beta$   | <i>p</i> | Eta2     | Cohens_f | 95% CI         |
|--------------------------------|----------|-----------|----------|----------|----------|----------------|
| TOR_signPD_rigidity_coldspot_L | -0.43    | -1.66e-03 | .906     | 8.54e-06 | 2.92e-03 | [-0.01, 0.01]  |
| TOR_signPD_rigidity_coldspot_R | -1.09    | -4.36e-03 | .570     | 5.59e-05 | 7.48e-03 | [-0.01, <0.01] |
| TOR_signPD_rigidity_hotspot_L  | -0.13    | -6.08e-04 | .986     | 7.98e-07 | 8.93e-04 | [-0.01, 0.01]  |
| TOR_signPD_rigidity_hotspot_R  | -0.51    | -2.45e-03 | .779     | 1.20e-05 | 3.46e-03 | [-0.01, 0.01]  |
| TOR_signPD_tremor_coldspot_L   | -0.35    | -1.50e-03 | .798     | 5.79e-06 | 2.41e-03 | [-0.01, 0.01]  |
| TOR_signPD_tremor_coldspot_R   | -0.95    | -4.06e-03 | .541     | 4.20e-05 | 6.48e-03 | [-0.01, <0.01] |
| TOR_signPD_tremor_hotspot_L    | -0.15    | -7.49e-04 | 1.00     | 1.09e-06 | 1.04e-03 | [-0.01, 0.01]  |
| TOR_signPD_tremor_hotspot_R    | -0.65    | -3.25e-03 | .922     | 1.95e-05 | 4.42e-03 | [-0.01, 0.01]  |
| Zona_Incerta_Atlas_cZI_L       | -1.05    | -4.43e-03 | .536     | 5.20e-05 | 7.21e-03 | [-0.01, <0.01] |
| Zona_Incerta_Atlas_cZI_R       | -1.06    | -4.45e-03 | .451     | 5.32e-05 | 7.29e-03 | [-0.01, <0.01] |
| Zona_Incerta_Atlas_fct_L       | -0.66    | -2.89e-03 | .888     | 2.04e-05 | 4.51e-03 | [-0.01, 0.01]  |
| Zona_Incerta_Atlas_fct_R       | -0.79    | -3.49e-03 | .593     | 2.90e-05 | 5.39e-03 | [-0.01, 0.01]  |
| Zona_Incerta_Atlas_fl_L        | -0.07    | -3.76e-04 | 1.00     | 2.31e-07 | 4.81e-04 | [-0.01, 0.01]  |
| Zona_Incerta_Atlas_fl_R        | -0.68    | -3.76e-03 | .776     | 2.19e-05 | 4.68e-03 | [-0.01, 0.01]  |
| Zona_Incerta_Atlas_ft_L        | -0.54    | -2.73e-03 | .741     | 1.38e-05 | 3.72e-03 | [-0.01, 0.01]  |
| Zona_Incerta_Atlas_ft_R        | -1.20    | -6.25e-03 | .503     | 6.80e-05 | 8.24e-03 | [-0.02, <0.01] |
| Zona_Incerta_Atlas_gm_mask     | -0.53    | -2.30e-03 | .727     | 1.33e-05 | 3.64e-03 | [-0.01, 0.01]  |
| Zona_Incerta_Atlas_hf_L        | -0.56    | -2.95e-03 | .717     | 1.47e-05 | 3.83e-03 | [-0.01, 0.01]  |
| Zona_Incerta_Atlas_hf_R        | -0.93    | -4.99e-03 | .487     | 4.02e-05 | 6.34e-03 | [-0.02, 0.01]  |

**Table S12*****ET PRS Associations with grey matter radial diffusivity (RD) - LeadDBS Atlas compendium extended***

| Tract                        | <i>t</i> | $\beta$   | <i>p</i> | Eta2     | Cohens_f | 95% CI            |
|------------------------------|----------|-----------|----------|----------|----------|-------------------|
| Zona_Incerta_Atlas_hfields_L | -0.39    | -2.00e-03 | .765     | 7.18e-06 | 2.68e-03 | [-0.01, 0.01]     |
| Zona_Incerta_Atlas_hfields_R | -1.01    | -5.31e-03 | .690     | 4.76e-05 | 6.90e-03 | [-0.02, 0.01]     |
| Zona_Incerta_Atlas_ml_L      | 0.70     | 2.68e-03  | .737     | 2.32e-05 | 4.81e-03 | [-0.01, 0.01]     |
| Zona_Incerta_Atlas_ml_R      | 0.31     | 1.13e-03  | .830     | 4.57e-06 | 2.14e-03 | [-0.01, 0.01]     |
| Zona_Incerta_Atlas_rZI_L     | -0.22    | -1.11e-03 | 1.00     | 2.22e-06 | 1.49e-03 | [-0.01, 0.01]     |
| Zona_Incerta_Atlas_rZI_R     | -0.78    | -4.08e-03 | .688     | 2.82e-05 | 5.31e-03 | [-0.01, 0.01]     |
| Zona_Incerta_Atlas_ZI_L      | -0.48    | -2.25e-03 | .898     | 1.09e-05 | 3.30e-03 | [-0.01, 0.01]     |
| Zona_Incerta_Atlas_ZI_R      | -0.90    | -4.36e-03 | .586     | 3.84e-05 | 6.19e-03 | [-0.01, 0.01]     |
| Zona_Incerta_Atlas_zRN_L     | -0.57    | -2.57e-03 | .696     | 1.52e-05 | 3.89e-03 | [-0.01, 0.01]     |
| Zona_Incerta_Atlas_zRN_R     | -0.97    | -4.45e-03 | .522     | 4.41e-05 | 6.64e-03 | [-0.01,<br><0.01] |
| Zona_Incerta_Atlas_zSTN_L    | -0.70    | -3.60e-03 | .664     | 2.31e-05 | 4.81e-03 | [-0.01, 0.01]     |
| Zona_Incerta_Atlas_zSTN_R    | -0.48    | -2.49e-03 | .851     | 1.06e-05 | 3.26e-03 | [-0.01, 0.01]     |

*Note*\* *p* < .05, \*\* *p* < .01, \*\*\* *p* < .001, 95% CI(B)**Table S13*****ET PRS Associations with grey matter axial diffusivity (AD) - LeadDBS Atlas compendium extended***

| Tract                                                        | <i>t</i> | $\beta$   | <i>p</i> | Eta2     | Cohens_f | 95% CI            |
|--------------------------------------------------------------|----------|-----------|----------|----------|----------|-------------------|
| Atlas_of_the_Human_Hypothalamus_anterior_commissure_L        | 0.11     | 7.62e-06  | 1.00     | 5.63e-07 | 7.50e-04 | [-0.01,<br><0.01] |
| Atlas_of_the_Human_Hypothalamus_anterior_commissure_R        | -0.05    | -3.00e-06 | 1.00     | 9.51e-08 | 3.08e-04 | [-0.01,<br><0.01] |
| Atlas_of_the_Human_Hypothalamus_anterior_hypothalamic_area_L | 0.72     | 7.12e-05  | .574     | 2.45e-05 | 4.95e-03 | [-0.01,<br><0.01] |

**Table S13**

*ET PRS Associations with grey matter axial diffusivity (AD) - LeadDBS\_Atlas\_compendium\_extended*

| Tract                                                                         | <i>t</i> | $\beta$   | <i>p</i> | Eta2     | Cohens_f | 95% CI         |
|-------------------------------------------------------------------------------|----------|-----------|----------|----------|----------|----------------|
| Atlas_of_the_Human_Hypothalamus_anterior_hypothalamic_area_R                  | 1.00     | 1.01e-04  | .388     | 4.68e-05 | 6.84e-03 | [-0.01, <0.01] |
| Atlas_of_the_Human_Hypothalamus_arcuate_hypothalamic_nucleus_L                | 1.47     | 2.24e-04  | .261     | 1.01e-04 | 1.00e-02 | [-0.01, <0.01] |
| Atlas_of_the_Human_Hypothalamus_arcuate_hypothalamic_nucleus_R                | 1.85     | 2.91e-04  | .101     | 1.61e-04 | 1.27e-02 | [-0.01, <0.01] |
| Atlas_of_the_Human_Hypothalamus_bed_nucleus_of_the_striatum_L                 | 0.34     | 2.76e-05  | .804     | 5.55e-06 | 2.36e-03 | [-0.01, <0.01] |
| Atlas_of_the_Human_Hypothalamus_bed_nucleus_of_the_striatum_R                 | 1.04     | 8.61e-05  | .327     | 5.09e-05 | 7.13e-03 | [-0.01, <0.01] |
| Atlas_of_the_Human_Hypothalamus_diagonal_band_of_Broca_L                      | -0.50    | -4.59e-05 | .756     | 1.16e-05 | 3.41e-03 | [-0.01, <0.01] |
| Atlas_of_the_Human_Hypothalamus_diagonal_band_of_Broca_R                      | -0.01    | -1.28e-06 | 1.00     | 7.53e-09 | 8.68e-05 | [-0.01, <0.01] |
| Atlas_of_the_Human_Hypothalamus_dorsal_periventricular_hypothalamic_nucleus_L | -0.06    | -7.08e-06 | 1.00     | 1.67e-07 | 4.08e-04 | [-0.01, <0.01] |
| Atlas_of_the_Human_Hypothalamus_dorsal_periventricular_hypothalamic_nucleus_R | 0.38     | 4.47e-05  | .863     | 6.66e-06 | 2.58e-03 | [-0.01, <0.01] |
| Atlas_of_the_Human_Hypothalamus_dorsomedial_hypothalamic_nucleus_L            | 0.53     | 5.56e-05  | .817     | 1.33e-05 | 3.65e-03 | [-0.01, <0.01] |
| Atlas_of_the_Human_Hypothalamus_dorsomedial_hypothalamic_nucleus_R            | 0.92     | 1.08e-04  | .490     | 3.99e-05 | 6.31e-03 | [-0.01, <0.01] |
| Atlas_of_the_Human_Hypothalamus_fornix_L                                      | 0.84     | 7.60e-05  | .441     | 3.31e-05 | 5.75e-03 | [-0.01, <0.01] |

**Table S13**

*ET PRS Associations with grey matter axial diffusivity (AD) - LeadDBS\_Atlas\_compendium\_extended*

| Tract                                                        | <i>t</i> | $\beta$   | <i>p</i> | Eta2     | Cohens_f | 95% CI            |
|--------------------------------------------------------------|----------|-----------|----------|----------|----------|-------------------|
| Atlas_of_the_Human_Hypothalamus_fornix_R                     | 0.01     | 1.10e-06  | 1.00     | 7.11e-09 | 8.43e-05 | [-0.01,<br><0.01] |
| Atlas_of_the_Human_Hypothalamus_gm_mask                      | 0.35     | 2.38e-05  | .802     | 5.60e-06 | 2.37e-03 | [-0.01,<br><0.01] |
| Atlas_of_the_Human_Hypothalamus_inferior_thalamic_peduncle_L | -0.04    | -3.65e-06 | 1.00     | 8.70e-08 | 2.95e-04 | [-0.01,<br><0.01] |
| Atlas_of_the_Human_Hypothalamus_inferior_thalamic_peduncle_R | -0.27    | -2.47e-05 | .964     | 3.37e-06 | 1.84e-03 | [-0.01,<br><0.01] |
| Atlas_of_the_Human_Hypothalamus_lateral_hypothalamus_L       | 0.61     | 5.45e-05  | .596     | 1.74e-05 | 4.18e-03 | [-0.01,<br><0.01] |
| Atlas_of_the_Human_Hypothalamus_lateral_hypothalamus_R       | -0.23    | -2.11e-05 | .930     | 2.58e-06 | 1.61e-03 | [-0.01,<br><0.01] |
| Atlas_of_the_Human_Hypothalamus_mammillary_bodies_L          | 1.58     | 1.91e-04  | .181     | 1.16e-04 | 1.08e-02 | [-0.01,<br><0.01] |
| Atlas_of_the_Human_Hypothalamus_mammillary_bodies_R          | 1.80     | 2.23e-04  | .098     | 1.52e-04 | 1.23e-02 | [-0.01,<br><0.01] |
| Atlas_of_the_Human_Hypothalamus_mammillothalamic_tract_L     | 0.10     | 8.24e-06  | 1.00     | 4.41e-07 | 6.64e-04 | [-0.01,<br><0.01] |
| Atlas_of_the_Human_Hypothalamus_mammillothalamic_tract_R     | 0.10     | 8.35e-06  | 1.00     | 4.35e-07 | 6.59e-04 | [-0.01,<br><0.01] |
| Atlas_of_the_Human_Hypothalamus_medial_preoptic_nucleus_L    | -0.71    | -6.79e-05 | .654     | 2.39e-05 | 4.89e-03 | [-0.01,<br><0.01] |
| Atlas_of_the_Human_Hypothalamus_medial_preoptic_nucleus_R    | 0.35     | 3.99e-05  | .802     | 5.64e-06 | 2.37e-03 | [-0.01,<br><0.01] |



**Table S13**

***ET PRS Associations with grey matter axial diffusivity (AD) - LeadDBS\_Atlas\_compendium\_extended***

| Tract                                                                         | <i>t</i>    | $\beta$         | <i>p</i>    | Eta2            | Cohens_f        | 95% CI                     |
|-------------------------------------------------------------------------------|-------------|-----------------|-------------|-----------------|-----------------|----------------------------|
| Atlas_of_the_Human_Hypothalamus_nucleus_basalis_of_Meynert_L                  | 0.66        | 4.93e-05        | .703        | 2.02e-05        | 4.50e-03        | [-0.01, <0.01]             |
| Atlas_of_the_Human_Hypothalamus_nucleus_basalis_of_Meynert_R                  | -0.82       | -6.02e-05       | .564        | 3.18e-05        | 5.64e-03        | [-0.01, <0.01]             |
| Atlas_of_the_Human_Hypothalamus_paraventricular_nucleus_L                     | 0.30        | 3.34e-05        | .841        | 4.21e-06        | 2.05e-03        | [-0.01, <0.01]             |
| Atlas_of_the_Human_Hypothalamus_paraventricular_nucleus_R                     | 1.33        | 2.05e-04        | .252        | 8.30e-05        | 9.11e-03        | [-0.01, <0.01]             |
| Atlas_of_the_Human_Hypothalamus_periventricular_hypothalamic_nucleus_L        | 1.05        | 1.24e-04        | .325        | 5.13e-05        | 7.16e-03        | [-0.01, <0.01]             |
| <b>Atlas_of_the_Human_Hypothalamus_periventricular_hypothalamic_nucleus_R</b> | <b>2.25</b> | <b>3.02e-04</b> | <b>.034</b> | <b>2.37e-04</b> | <b>1.54e-02</b> | <b>&lt;0.01, &lt;0.01]</b> |
| Atlas_of_the_Human_Hypothalamus_posterior_hypothalamic_nucleus_L              | 0.49        | 5.14e-05        | .689        | 1.11e-05        | 3.33e-03        | [-0.01, <0.01]             |
| Atlas_of_the_Human_Hypothalamus_posterior_hypothalamic_nucleus_R              | 0.91        | 1.13e-04        | .445        | 3.87e-05        | 6.22e-03        | [-0.01, <0.01]             |
| Atlas_of_the_Human_Hypothalamus_red_nucleus_L                                 | 0.02        | 1.54e-06        | 1.00        | 1.86e-08        | 1.36e-04        | [-0.01, <0.01]             |
| Atlas_of_the_Human_Hypothalamus_red_nucleus_R                                 | -0.04       | -2.78e-06       | 1.00        | 5.92e-08        | 2.43e-04        | [-0.01, <0.01]             |
| Atlas_of_the_Human_Hypothalamus_substantia_nigra_L                            | -0.23       | -1.83e-05       | .900        | 2.48e-06        | 1.58e-03        | [-0.01, <0.01]             |
| Atlas_of_the_Human_Hypothalamus_substantia_nigra_R                            | -0.84       | -6.60e-05       | .551        | 3.31e-05        | 5.76e-03        | [-0.01, <0.01]             |

**Table S13**

*ET PRS Associations with grey matter axial diffusivity (AD) - LeadDBS\_Atlas\_compendium\_extended*

| Tract                                                                   | <i>t</i> | $\beta$   | <i>p</i> | Eta2     | Cohens_f | 95% CI         |
|-------------------------------------------------------------------------|----------|-----------|----------|----------|----------|----------------|
| Atlas_of_the_Human_Hypothalamus_subthalamic_nucleus_L                   | -0.61    | -5.32e-05 | .747     | 1.73e-05 | 4.16e-03 | [-0.01, <0.01] |
| Atlas_of_the_Human_Hypothalamus_subthalamic_nucleus_R                   | -0.82    | -7.36e-05 | .566     | 3.16e-05 | 5.62e-03 | [-0.01, <0.01] |
| Atlas_of_the_Human_Hypothalamus_suprachiasmatic_hypothalamic_nucleus_L  | 0.18     | 2.97e-05  | .944     | 1.49e-06 | 1.22e-03 | [-0.01, <0.01] |
| Atlas_of_the_Human_Hypothalamus_suprachiasmatic_hypothalamic_nucleus_R  | 0.99     | 1.64e-04  | .396     | 4.57e-05 | 6.76e-03 | [-0.01, <0.01] |
| Atlas_of_the_Human_Hypothalamus_supraoptic_hypothalamic_nucleus_L       | 0.83     | 1.03e-04  | .445     | 3.25e-05 | 5.70e-03 | [-0.01, <0.01] |
| Atlas_of_the_Human_Hypothalamus_supraoptic_hypothalamic_nucleus_R       | 0.72     | 8.94e-05  | .641     | 2.43e-05 | 4.93e-03 | [-0.01, <0.01] |
| Atlas_of_the_Human_Hypothalamus_tuberomammillary_hypothalamic_nucleus_L | 1.61     | 1.94e-04  | .131     | 1.22e-04 | 1.10e-02 | [-0.01, <0.01] |
| Atlas_of_the_Human_Hypothalamus_tuberomammillary_hypothalamic_nucleus_R | 1.17     | 1.36e-04  | .295     | 6.44e-05 | 8.03e-03 | [-0.01, <0.01] |
| Atlas_of_the_Human_Hypothalamus_ventromedial_hypothalamic_nucleus_L     | 1.41     | 1.53e-04  | .217     | 9.35e-05 | 9.67e-03 | [-0.01, <0.01] |
| Atlas_of_the_Human_Hypothalamus_ventromedial_hypothalamic_nucleus_R     | 1.62     | 1.75e-04  | .165     | 1.23e-04 | 1.11e-02 | [-0.01, <0.01] |
| Atlas_of_the_Human_Hypothalamus_zona_incerta_L                          | -0.52    | -4.58e-05 | .828     | 1.27e-05 | 3.57e-03 | [-0.01, <0.01] |
| Atlas_of_the_Human_Hypothalamus_zona_incerta_R                          | -0.87    | -7.86e-05 | .532     | 3.51e-05 | 5.92e-03 | [-0.01, <0.01] |

**Table S13**

*ET PRS Associations with grey matter axial diffusivity (AD) - LeadDBS\_Atlas\_compendium\_extended*

| Tract                              | <i>t</i> | $\beta$   | <i>p</i> | Eta2     | Cohens_f | 95% CI            |
|------------------------------------|----------|-----------|----------|----------|----------|-------------------|
| Brainstem_Connectome_Atlas_CST_L   | 0.85     | 7.27e-05  | .482     | 3.40e-05 | 5.83e-03 | [-0.01,<br><0.01] |
| Brainstem_Connectome_Atlas_CST_R   | 0.59     | 4.68e-05  | .675     | 1.66e-05 | 4.07e-03 | [-0.01,<br><0.01] |
| Brainstem_Connectome_Atlas_FPT_L   | 1.24     | 1.11e-04  | .336     | 7.25e-05 | 8.51e-03 | [-0.01,<br><0.01] |
| Brainstem_Connectome_Atlas_FPT_R   | 0.92     | 7.80e-05  | .489     | 4.00e-05 | 6.32e-03 | [-0.01,<br><0.01] |
| Brainstem_Connectome_Atlas_gm_mask | 0.56     | 3.69e-05  | .633     | 1.47e-05 | 3.83e-03 | [-0.01,<br><0.01] |
| Brainstem_Connectome_Atlas_ICPMC_L | -0.05    | -3.04e-06 | 1.00     | 1.32e-07 | 3.64e-04 | [-0.01,<br><0.01] |
| Brainstem_Connectome_Atlas_ICPMC_R | -0.44    | -2.47e-05 | .727     | 9.02e-06 | 3.00e-03 | [-0.01,<br><0.01] |
| Brainstem_Connectome_Atlas_ICPVC_L | -0.16    | -8.75e-06 | .956     | 1.27e-06 | 1.13e-03 | [-0.01,<br><0.01] |
| Brainstem_Connectome_Atlas_ICPVC_R | -0.51    | -2.80e-05 | .749     | 1.20e-05 | 3.47e-03 | [-0.01,<br><0.01] |
| Brainstem_Connectome_Atlas_LL_L    | 1.17     | 9.77e-05  | .381     | 6.40e-05 | 8.00e-03 | [-0.01,<br><0.01] |
| Brainstem_Connectome_Atlas_LL_R    | 0.61     | 4.89e-05  | .902     | 1.75e-05 | 4.18e-03 | [-0.01,<br><0.01] |
| Brainstem_Connectome_Atlas_MCP_M   | 0.39     | 2.12e-05  | .942     | 7.12e-06 | 2.67e-03 | [-0.01,<br><0.01] |

**Table S13**

*ET PRS Associations with grey matter axial diffusivity (AD) - LeadDBS\_Atlas\_compendium\_extended*

| Tract                              | <i>t</i> | $\beta$   | <i>p</i> | Eta2     | Cohens_f | 95% CI            |
|------------------------------------|----------|-----------|----------|----------|----------|-------------------|
| Brainstem_Connectome_Atlas_ML_L    | 0.70     | 4.87e-05  | .531     | 2.31e-05 | 4.81e-03 | [-0.01,<br><0.01] |
| Brainstem_Connectome_Atlas_ML_R    | 0.81     | 5.33e-05  | .507     | 3.11e-05 | 5.58e-03 | [-0.01,<br><0.01] |
| Brainstem_Connectome_Atlas_POTPT_L | 0.71     | 5.26e-05  | .526     | 2.36e-05 | 4.86e-03 | [-0.01,<br><0.01] |
| Brainstem_Connectome_Atlas_POTPT_R | 0.15     | 1.07e-05  | .965     | 1.12e-06 | 1.06e-03 | [-0.01,<br><0.01] |
| Brainstem_Connectome_Atlas_SCPCR_L | -0.18    | -9.07e-06 | .940     | 1.57e-06 | 1.25e-03 | [-0.01,<br><0.01] |
| Brainstem_Connectome_Atlas_SCPCR_R | -0.27    | -1.35e-05 | .865     | 3.44e-06 | 1.85e-03 | [-0.01,<br><0.01] |
| Brainstem_Connectome_Atlas_SCPCT_L | -0.12    | -5.77e-06 | .997     | 6.48e-07 | 8.05e-04 | [-0.01,<br><0.01] |
| Brainstem_Connectome_Atlas_SCPCT_R | -0.20    | -9.97e-06 | .922     | 1.95e-06 | 1.40e-03 | [-0.01,<br><0.01] |
| Brainstem_Connectome_Atlas_SCPSC_L | 0.70     | 5.75e-05  | .589     | 2.32e-05 | 4.82e-03 | [-0.01,<br><0.01] |
| Brainstem_Connectome_Atlas_SCPSC_R | 0.41     | 3.02e-05  | .751     | 7.83e-06 | 2.80e-03 | [-0.01,<br><0.01] |
| Brainstem_Connectome_Atlas_STT_L   | 0.76     | 5.95e-05  | .613     | 2.73e-05 | 5.22e-03 | [-0.01,<br><0.01] |
| Brainstem_Connectome_Atlas_STT_R   | 0.76     | 5.33e-05  | .547     | 2.73e-05 | 5.23e-03 | [-0.01,<br><0.01] |

**Table S13**

*ET PRS Associations with grey matter axial diffusivity (AD) - LeadDBS\_Atlas\_compendium\_extended*

| Tract                   | <i>t</i> | $\beta$   | <i>p</i> | Eta2     | Cohens_f | 95% CI            |
|-------------------------|----------|-----------|----------|----------|----------|-------------------|
| DBS_targets_AD_FORNIX_L | -0.43    | -3.59e-05 | .734     | 8.67e-06 | 2.94e-03 | [-0.01,<br><0.01] |
| DBS_targets_AD_FORNIX_R | 0.46     | 3.85e-05  | .712     | 9.80e-06 | 3.13e-03 | [-0.01,<br><0.01] |
| DBS_targets_ADD_NAc_L   | 0.14     | 1.48e-05  | .981     | 8.73e-07 | 9.34e-04 | [-0.01,<br><0.01] |
| DBS_targets_ADD_NAc_R   | -0.01    | -3.12e-07 | 1.00     | 4.11e-10 | 2.03e-05 | [-0.01,<br><0.01] |
| DBS_targets_Dyt_GPi_L   | 1.28     | 9.16e-05  | .313     | 7.72e-05 | 8.79e-03 | [-0.01,<br><0.01] |
| DBS_targets_Dyt_GPi_R   | 0.15     | 1.01e-05  | 1.00     | 1.01e-06 | 1.01e-03 | [-0.01,<br><0.01] |
| DBS_targets_ET_VIM_L    | 0.12     | 8.46e-06  | .991     | 7.21e-07 | 8.49e-04 | [-0.01,<br><0.01] |
| DBS_targets_ET_VIM_R    | 0.08     | 5.18e-06  | 1.00     | 2.64e-07 | 5.14e-04 | [-0.01,<br><0.01] |
| DBS_targets_MD_SCC_L    | -1.25    | -7.90e-05 | .429     | 7.27e-05 | 8.53e-03 | [-0.01,<br><0.01] |
| DBS_targets_MD_SCC_R    | -1.39    | -9.06e-05 | .339     | 9.03e-05 | 9.50e-03 | [-0.01,<br><0.01] |
| DBS_targets_OCD_ALIC_L  | 0.37     | 2.76e-05  | .901     | 6.55e-06 | 2.56e-03 | [-0.01,<br><0.01] |
| DBS_targets_OCD_ALIC_R  | 0.77     | 5.83e-05  | .581     | 2.78e-05 | 5.28e-03 | [-0.01,<br><0.01] |

**Table S13**

*ET PRS Associations with grey matter axial diffusivity (AD) - LeadDBS\_Atlas\_compendium\_extended*

| Tract                                    | <i>t</i> | $\beta$   | <i>p</i> | Eta2     | Cohens_f | 95% CI            |
|------------------------------------------|----------|-----------|----------|----------|----------|-------------------|
| DBS_targets_OCD_NAc_L                    | -0.66    | -6.09e-05 | .620     | 2.06e-05 | 4.54e-03 | [-0.01,<br><0.01] |
| DBS_targets_OCD_NAc_R                    | -0.80    | -7.61e-05 | .583     | 2.99e-05 | 5.47e-03 | [-0.01,<br><0.01] |
| DBS_targets_PD_STN_L                     | -0.92    | -8.01e-05 | .490     | 3.99e-05 | 6.31e-03 | [-0.01,<br><0.01] |
| DBS_targets_PD_STN_R                     | -0.83    | -7.72e-05 | .556     | 3.26e-05 | 5.71e-03 | [-0.01,<br><0.01] |
| DBS_targets_TS_CMPVVOI_L                 | 0.19     | 1.62e-05  | .933     | 1.73e-06 | 1.31e-03 | [-0.01,<br><0.01] |
| DBS_targets_TS_CMPVVOI_R                 | -0.19    | -1.72e-05 | .932     | 1.74e-06 | 1.32e-03 | [-0.01,<br><0.01] |
| DBS_Tractography_Atlas_Ca                | 1.36     | 1.16e-04  | .191     | 8.67e-05 | 9.31e-03 | [-0.01,<br><0.01] |
| DBS_Tractography_Atlas_EXA               | 0.79     | 5.67e-05  | .527     | 2.91e-05 | 5.39e-03 | [-0.01,<br><0.01] |
| DBS_Tractography_Atlas_HN                | 1.99     | 2.47e-04  | .056     | 1.86e-04 | 1.37e-02 | [<0.01,<br><0.01] |
| DBS_Tractography_Atlas_HTH               | 0.71     | 5.99e-05  | .587     | 2.33e-05 | 4.83e-03 | [-0.01,<br><0.01] |
| DBS_Tractography_Atlas_L_STN_associative | -0.62    | -6.37e-05 | .908     | 1.82e-05 | 4.27e-03 | [-0.01,<br><0.01] |
| DBS_Tractography_Atlas_L_STN_limbic      | -0.65    | -6.15e-05 | .706     | 2.00e-05 | 4.48e-03 | [-0.01,<br><0.01] |

**Table S13**

*ET PRS Associations with grey matter axial diffusivity (AD) - LeadDBS\_Atlas\_compendium\_extended*

| Tract                                    | <i>t</i> | $\beta$   | <i>p</i> | Eta2     | Cohens_f | 95% CI            |
|------------------------------------------|----------|-----------|----------|----------|----------|-------------------|
| DBS_Tractography_Atlas_L_STN_motor       | -1.26    | -1.08e-04 | .325     | 7.48e-05 | 8.65e-03 | [-0.01,<br><0.01] |
| DBS_Tractography_Atlas_MN                | 1.75     | 1.98e-04  | .111     | 1.43e-04 | 1.20e-02 | [-0.01,<br><0.01] |
| DBS_Tractography_Atlas_NAC               | -0.15    | -1.04e-05 | .965     | 1.11e-06 | 1.05e-03 | [-0.01,<br><0.01] |
| DBS_Tractography_Atlas_PBP               | -0.44    | -3.14e-05 | .723     | 9.22e-06 | 3.04e-03 | [-0.01,<br><0.01] |
| DBS_Tractography_Atlas_Pu                | 0.91     | 4.44e-05  | .442     | 3.90e-05 | 6.24e-03 | [-0.01,<br><0.01] |
| DBS_Tractography_Atlas_R_STN_associative | -0.90    | -8.95e-05 | .464     | 3.79e-05 | 6.16e-03 | [-0.01,<br><0.01] |
| DBS_Tractography_Atlas_R_STN_limbic      | -1.31    | -1.35e-04 | .301     | 7.99e-05 | 8.94e-03 | [-0.01,<br><0.01] |
| DBS_Tractography_Atlas_R_STN_motor       | -0.71    | -6.22e-05 | .585     | 2.35e-05 | 4.85e-03 | [-0.01,<br><0.01] |
| DBS_Tractography_Atlas_SNc               | -0.58    | -4.31e-05 | .685     | 1.59e-05 | 3.98e-03 | [-0.01,<br><0.01] |
| DBS_Tractography_Atlas_SNr               | -0.55    | -4.31e-05 | .798     | 1.43e-05 | 3.78e-03 | [-0.01,<br><0.01] |
| DBS_Tractography_Atlas_VeP               | -0.07    | -5.81e-06 | 1.00     | 2.21e-07 | 4.70e-04 | [-0.01,<br><0.01] |
| DBS_Tractography_Atlas_VTA               | -0.26    | -1.90e-05 | .967     | 3.27e-06 | 1.81e-03 | [-0.01,<br><0.01] |

**Table S13**

***ET PRS Associations with grey matter axial diffusivity (AD) - LeadDBS\_Atlas\_compendium\_extended***

| Tract                                                                             | <i>t</i> | $\beta$   | <i>p</i> | Eta2     | Cohens_f | 95% CI         |
|-----------------------------------------------------------------------------------|----------|-----------|----------|----------|----------|----------------|
| Dystonia_Response_Tract_Atlas_Sweetspot_cervical_L                                | 0.64     | 3.89e-05  | .625     | 1.92e-05 | 4.39e-03 | [-0.01, <0.01] |
| Dystonia_Response_Tract_Atlas_Sweetspot_cervical_R                                | -1.01    | -5.93e-05 | .441     | 4.81e-05 | 6.94e-03 | [-0.01, <0.01] |
| Dystonia_Response_Tract_Atlas_Sweetspot_generalized_L                             | 0.77     | 4.76e-05  | .536     | 2.81e-05 | 5.30e-03 | [-0.01, <0.01] |
| Dystonia_Response_Tract_Atlas_Sweetspot_generalized_R                             | -0.57    | -3.45e-05 | .698     | 1.51e-05 | 3.88e-03 | [-0.01, <0.01] |
| Nigral_O'Donnell Research Group<br>(ORG)anization_atlas_lateral_SNc_somatomotor_L | -0.29    | -2.39e-05 | .904     | 3.83e-06 | 1.96e-03 | [-0.01, <0.01] |
| Nigral_O'Donnell Research Group<br>(ORG)anization_atlas_lateral_SNc_somatomotor_R | -1.50    | -1.25e-04 | .239     | 1.05e-04 | 1.03e-02 | [-0.01, <0.01] |
| Nigral_O'Donnell Research Group<br>(ORG)anization_atlas_medial_SNc_limbic_L       | -0.09    | -7.20e-06 | 1.00     | 3.41e-07 | 5.84e-04 | [-0.01, <0.01] |
| Nigral_O'Donnell Research Group<br>(ORG)anization_atlas_medial_SNc_limbic_R       | -1.51    | -1.27e-04 | .206     | 1.07e-04 | 1.03e-02 | [-0.01, <0.01] |
| Nigral_O'Donnell Research Group<br>(ORG)anization_atlas_ventral_SN_associative_L  | -0.14    | -1.24e-05 | 1.00     | 9.17e-07 | 9.57e-04 | [-0.01, <0.01] |
| Nigral_O'Donnell Research Group<br>(ORG)anization_atlas_ventral_SN_associative_R  | -1.38    | -1.23e-04 | .264     | 8.91e-05 | 9.44e-03 | [-0.01, <0.01] |
| Striatal_Functional_Networks_17Networks_1                                         | -0.91    | -5.69e-05 | .443     | 3.89e-05 | 6.24e-03 | [-0.01, <0.01] |
| Striatal_Functional_Networks_17Networks_10                                        | 0.10     | 6.44e-06  | 1.00     | 5.03e-07 | 7.09e-04 | [-0.01, <0.01] |



**Table S13**

*ET PRS Associations with grey matter axial diffusivity (AD) - LeadDBS\_Atlas\_compendium\_extended*

| Tract                                      | <i>t</i> | $\beta$   | <i>p</i> | Eta2     | Cohens_f | 95% CI         |
|--------------------------------------------|----------|-----------|----------|----------|----------|----------------|
| Striatum_Functional_Networks_17Networks_12 | 0.35     | 2.00e-05  | .833     | 5.87e-06 | 2.42e-03 | [-0.01, <0.01] |
| Striatum_Functional_Networks_17Networks_13 | 1.35     | 1.83e-04  | .194     | 8.57e-05 | 9.26e-03 | [-0.01, <0.01] |
| Striatum_Functional_Networks_17Networks_14 | 1.94     | 1.08e-04  | .082     | 1.77e-04 | 1.33e-02 | [-0.01, <0.01] |
| Striatum_Functional_Networks_17Networks_16 | 0.97     | 9.60e-05  | .364     | 4.43e-05 | 6.65e-03 | [-0.01, <0.01] |
| Striatum_Functional_Networks_17Networks_17 | 1.58     | 1.26e-04  | .126     | 1.17e-04 | 1.08e-02 | [-0.01, <0.01] |
| Striatum_Functional_Networks_17Networks_3  | 1.31     | 6.73e-05  | .262     | 8.02e-05 | 8.95e-03 | [-0.01, <0.01] |
| Striatum_Functional_Networks_17Networks_4  | 0.48     | 2.60e-05  | .694     | 1.08e-05 | 3.29e-03 | [-0.01, <0.01] |
| Striatum_Functional_Networks_17Networks_6  | -0.08    | -5.41e-06 | 1.00     | 2.65e-07 | 5.15e-04 | [-0.01, <0.01] |
| Striatum_Functional_Networks_17Networks_7  | 1.17     | 6.19e-05  | .298     | 6.36e-05 | 7.98e-03 | [-0.01, <0.01] |
| Striatum_Functional_Networks_17Networks_8  | 1.04     | 5.38e-05  | .326     | 5.11e-05 | 7.15e-03 | [-0.01, <0.01] |
| Striatum_Functional_Networks_17Networks_9  | 0.11     | 6.53e-06  | 1.00     | 5.67e-07 | 7.53e-04 | [-0.01, <0.01] |
| Striatum_Functional_Networks_7Networks_1   | -0.91    | -5.69e-05 | .443     | 3.89e-05 | 6.24e-03 | [-0.01, <0.01] |

**Table S13**

*ET PRS Associations with grey matter axial diffusivity (AD) - LeadDBS\_Atlas\_compendium\_extended*

| Tract                                    | <i>t</i> | $\beta$   | <i>p</i> | Eta2     | Cohens_f | 95% CI         |
|------------------------------------------|----------|-----------|----------|----------|----------|----------------|
| Striatal_Functional_Networks_7Networks_2 | 1.02     | 5.18e-05  | .376     | 4.88e-05 | 6.98e-03 | [-0.01, <0.01] |
| Striatal_Functional_Networks_7Networks_3 | -0.12    | -7.27e-06 | .995     | 6.71e-07 | 8.19e-04 | [-0.01, <0.01] |
| Striatal_Functional_Networks_7Networks_4 | 1.28     | 6.51e-05  | .244     | 7.70e-05 | 8.78e-03 | [-0.01, <0.01] |
| Striatal_Functional_Networks_7Networks_5 | 0.07     | 4.51e-06  | 1.00     | 2.46e-07 | 4.96e-04 | [-0.01, <0.01] |
| Striatal_Functional_Networks_7Networks_6 | 1.15     | 7.58e-05  | .274     | 6.22e-05 | 7.89e-03 | [-0.01, <0.01] |
| Striatal_Functional_Networks_7Networks_7 | 1.16     | 1.16e-04  | .272     | 6.27e-05 | 7.92e-03 | [-0.01, <0.01] |
| Thalamic_Functional_Atlas_1_L            | 0.24     | 1.47e-05  | .888     | 2.80e-06 | 1.67e-03 | [-0.01, <0.01] |
| Thalamic_Functional_Atlas_1_R            | 0.24     | 1.47e-05  | .888     | 2.80e-06 | 1.67e-03 | [-0.01, <0.01] |
| Thalamic_Functional_Atlas_10_L           | 1.59     | 1.16e-04  | .155     | 1.18e-04 | 1.09e-02 | [-0.01, <0.01] |
| Thalamic_Functional_Atlas_10_R           | 0.06     | 3.88e-06  | 1.00     | 1.73e-07 | 4.16e-04 | [-0.01, <0.01] |
| Thalamic_Functional_Atlas_11_L           | 1.92     | 1.45e-04  | .101     | 1.73e-04 | 1.31e-02 | [-0.01, <0.01] |
| Thalamic_Functional_Atlas_11_R           | 1.76     | 1.42e-04  | .123     | 1.45e-04 | 1.21e-02 | [-0.01, <0.01] |

**Table S13**

*ET PRS Associations with grey matter axial diffusivity (AD) - LeadDBS\_Atlas\_compendium\_extended*

| Tract                                  | <i>t</i>    | $\beta$         | <i>p</i>    | Eta2            | Cohens_f        | 95% CI                          |
|----------------------------------------|-------------|-----------------|-------------|-----------------|-----------------|---------------------------------|
| Thalamic_Functional_Atlas_12_L         | 0.42        | 5.89e-05        | .821        | 8.42e-06        | 2.90e-03        | [-0.01,<br><0.01]               |
| Thalamic_Functional_Atlas_12_R         | 0.54        | 6.48e-05        | .648        | 1.37e-05        | 3.70e-03        | [-0.01,<br><0.01]               |
| Thalamic_Functional_Atlas_13_R         | 0.63        | 4.48e-05        | .581        | 1.86e-05        | 4.32e-03        | [-0.01,<br><0.01]               |
| <b>Thalamic_Functional_Atlas_13A_L</b> | <b>2.42</b> | <b>1.74e-04</b> | <b>.022</b> | <b>2.73e-04</b> | <b>1.65e-02</b> | <b>[&lt;0.01,<br/>&lt;0.01]</b> |
| Thalamic_Functional_Atlas_13B_L        | -0.09       | -5.35e-06       | 1.00        | 3.39e-07        | 5.82e-04        | [-0.01,<br><0.01]               |
| <b>Thalamic_Functional_Atlas_14_L</b>  | <b>2.36</b> | <b>3.42e-04</b> | <b>.041</b> | <b>2.61e-04</b> | <b>1.62e-02</b> | <b>[&lt;0.01,<br/>&lt;0.01]</b> |
| Thalamic_Functional_Atlas_14_R         | 2.14        | 3.06e-04        | .071        | 2.15e-04        | 1.47e-02        | [-0.01,<br><0.01]               |
| Thalamic_Functional_Atlas_15_L         | 0.85        | 4.78e-05        | .487        | 3.35e-05        | 5.79e-03        | [-0.01,<br><0.01]               |
| <b>Thalamic_Functional_Atlas_15_R</b>  | <b>2.31</b> | <b>1.57e-04</b> | <b>.029</b> | <b>2.49e-04</b> | <b>1.58e-02</b> | <b>[&lt;0.01,<br/>&lt;0.01]</b> |
| Thalamic_Functional_Atlas_2_L          | 0.07        | 3.84e-06        | 1.00        | 2.09e-07        | 4.58e-04        | [-0.01,<br><0.01]               |
| Thalamic_Functional_Atlas_2_R          | 0.66        | 4.12e-05        | .561        | 2.04e-05        | 4.51e-03        | [-0.01,<br><0.01]               |
| Thalamic_Functional_Atlas_3_R          | 2.10        | 1.51e-04        | .057        | 2.06e-04        | 1.44e-02        | [-0.01,<br><0.01]               |

**Table S13**

*ET PRS Associations with grey matter axial diffusivity (AD) - LeadDBS\_Atlas\_compendium\_extended*

| Tract                                | <i>t</i>    | $\beta$         | <i>p</i>    | Eta2            | Cohens_f        | 95% CI                                 |
|--------------------------------------|-------------|-----------------|-------------|-----------------|-----------------|----------------------------------------|
| Thalamic_Functional_Atlas_4_R        | 1.56        | 1.02e-04        | .187        | 1.14e-04        | 1.07e-02        | [-0.01,<br><0.01]                      |
| Thalamic_Functional_Atlas_4A_L       | 0.11        | 6.53e-06        | 1.00        | 5.95e-07        | 7.71e-04        | [-0.01,<br><0.01]                      |
| Thalamic_Functional_Atlas_4B_L       | 1.94        | 1.38e-04        | .072        | 1.76e-04        | 1.33e-02        | [-0.01,<br><0.01]                      |
| Thalamic_Functional_Atlas_5_R        | 1.50        | 1.63e-04        | .209        | 1.06e-04        | 1.03e-02        | [-0.01,<br><0.01]                      |
| Thalamic_Functional_Atlas_6_L        | 0.90        | 7.91e-05        | .503        | 3.84e-05        | 6.19e-03        | [-0.01,<br><0.01]                      |
| Thalamic_Functional_Atlas_6_R        | 0.39        | 3.44e-05        | .763        | 7.27e-06        | 2.70e-03        | [-0.01,<br><0.01]                      |
| <b>Thalamic_Functional_Atlas_7_L</b> | <b>2.17</b> | <b>2.26e-04</b> | <b>.047</b> | <b>2.22e-04</b> | <b>1.49e-02</b> | <b>&lt;-0.01,</b><br><b>&lt;-0.01]</b> |
| Thalamic_Functional_Atlas_7_R        | 1.54        | 1.54e-04        | .135        | 1.12e-04        | 1.06e-02        | [-0.01,<br><0.01]                      |
| Thalamic_Functional_Atlas_8_L        | 0.87        | 4.50e-05        | .469        | 3.55e-05        | 5.96e-03        | [-0.01,<br><0.01]                      |
| Thalamic_Functional_Atlas_8_R        | 0.78        | 4.10e-05        | .481        | 2.83e-05        | 5.32e-03        | [-0.01,<br><0.01]                      |
| Thalamic_Functional_Atlas_9_R        | 1.81        | 1.99e-04        | .111        | 1.53e-04        | 1.24e-02        | [-0.01,<br><0.01]                      |
| Thalamic_Functional_Atlas_9A_L       | 1.89        | 2.23e-04        | .072        | 1.68e-04        | 1.29e-02        | [-0.01,<br><0.01]                      |

**Table S13**

*ET PRS Associations with grey matter axial diffusivity (AD) - LeadDBS\_Atlas\_compendium\_extended*

| Tract                               | <i>t</i> | $\beta$   | <i>p</i> | Eta2     | Cohens_f | 95% CI            |
|-------------------------------------|----------|-----------|----------|----------|----------|-------------------|
| Thalamic_Functional_Atlas_9B_L      | 2.06     | 2.25e-04  | .072     | 1.99e-04 | 1.41e-02 | [<0.01,<br><0.01] |
| TOR_PSM_dystonia_gpi_n64_coldspot_L | 0.27     | 1.61e-05  | .866     | 3.42e-06 | 1.85e-03 | [-0.01,<br><0.01] |
| TOR_PSM_dystonia_gpi_n64_coldspot_R | -0.29    | -1.71e-05 | .848     | 3.97e-06 | 1.99e-03 | [-0.01,<br><0.01] |
| TOR_PSM_dystonia_gpi_n64_hotspot_L  | 0.51     | 2.98e-05  | .839     | 1.22e-05 | 3.49e-03 | [-0.01,<br><0.01] |
| TOR_PSM_dystonia_gpi_n64_hotspot_R  | -0.37    | -2.12e-05 | .870     | 6.40e-06 | 2.53e-03 | [-0.01,<br><0.01] |
| TOR_PSM_pd_gpi_n28_coldspot_L       | -0.10    | -7.07e-06 | 1.00     | 4.37e-07 | 6.61e-04 | [-0.01,<br><0.01] |
| TOR_PSM_pd_gpi_n28_coldspot_R       | -0.94    | -6.46e-05 | .477     | 4.15e-05 | 6.44e-03 | [-0.01,<br><0.01] |
| TOR_PSM_pd_gpi_n28_hotspot_L        | 0.79     | 5.04e-05  | .526     | 2.91e-05 | 5.40e-03 | [-0.01,<br><0.01] |
| TOR_PSM_pd_gpi_n28_hotspot_R        | -0.09    | -5.38e-06 | 1.00     | 3.57e-07 | 5.97e-04 | [-0.01,<br><0.01] |
| TOR_PSM_pd_stn_n275_coldspot_L      | -0.68    | -4.83e-05 | .687     | 2.14e-05 | 4.62e-03 | [-0.01,<br><0.01] |
| TOR_PSM_pd_stn_n275_coldspot_R      | -0.85    | -6.19e-05 | .547     | 3.35e-05 | 5.79e-03 | [-0.01,<br><0.01] |
| TOR_PSM_pd_stn_n275_hotspot_L       | -0.91    | -7.20e-05 | .566     | 3.87e-05 | 6.22e-03 | [-0.01,<br><0.01] |

**Table S13**

*ET PRS Associations with grey matter axial diffusivity (AD) - LeadDBS\_Atlas\_compendium\_extended*

| Tract                             | <i>t</i> | $\beta$   | <i>p</i> | Eta2     | Cohens_f | 95% CI            |
|-----------------------------------|----------|-----------|----------|----------|----------|-------------------|
| TOR_PSM_pd_stn_n275_hotspot_R     | -0.79    | -6.45e-05 | .592     | 2.91e-05 | 5.39e-03 | [-0.01,<br><0.01] |
| TOR_PSM_psych_scc_n76_coldspot_L  | -0.07    | -8.05e-06 | 1.00     | 2.20e-07 | 4.69e-04 | [-0.01,<br><0.01] |
| TOR_PSM_psych_scc_n76_coldspot_R  | -0.31    | -3.19e-05 | .832     | 4.50e-06 | 2.12e-03 | [-0.01,<br><0.01] |
| TOR_PSM_psych_scc_n76_hotspot_L   | -1.07    | -7.11e-05 | .396     | 5.34e-05 | 7.31e-03 | [-0.01,<br><0.01] |
| TOR_PSM_psych_scc_n76_hotspot_R   | -1.26    | -8.14e-05 | .363     | 7.42e-05 | 8.61e-03 | [-0.01,<br><0.01] |
| TOR_PSM_tremor_vim_n39_coldspot_L | -0.18    | -1.29e-05 | .939     | 1.60e-06 | 1.27e-03 | [-0.01,<br><0.01] |
| TOR_PSM_tremor_vim_n39_coldspot_R | 0.43     | 2.98e-05  | .884     | 8.51e-06 | 2.92e-03 | [-0.01,<br><0.01] |
| TOR_PSM_tremor_vim_n39_hotspot_L  | -0.29    | -1.71e-05 | .846     | 4.04e-06 | 2.01e-03 | [-0.01,<br><0.01] |
| TOR_PSM_tremor_vim_n39_hotspot_R  | 0.12     | 7.04e-06  | .994     | 6.93e-07 | 8.32e-04 | [-0.01,<br><0.01] |
| TOR_signPD_axial_signs_coldspot_L | -0.55    | -3.56e-05 | .713     | 1.41e-05 | 3.75e-03 | [-0.01,<br><0.01] |
| TOR_signPD_axial_signs_coldspot_R | -0.49    | -3.25e-05 | .686     | 1.13e-05 | 3.36e-03 | [-0.01,<br><0.01] |
| TOR_signPD_axial_signs_hotspot_L  | -1.16    | -9.05e-05 | .385     | 6.33e-05 | 7.96e-03 | [-0.01,<br><0.01] |

**Table S13**

*ET PRS Associations with grey matter axial diffusivity (AD) - LeadDBS\_Atlas\_compendium\_extended*

| Tract                              | <i>t</i> | $\beta$   | <i>p</i> | Eta2     | Cohens_f | 95% CI            |
|------------------------------------|----------|-----------|----------|----------|----------|-------------------|
| TOR_signPD_axial_signs_hotspot_R   | -1.10    | -9.14e-05 | .430     | 5.62e-05 | 7.50e-03 | [-0.01,<br><0.01] |
| TOR_signPD_bradykinesia_coldspot_L | -0.71    | -5.13e-05 | .584     | 2.36e-05 | 4.86e-03 | [-0.01,<br><0.01] |
| TOR_signPD_bradykinesia_coldspot_R | -0.87    | -6.49e-05 | .563     | 3.55e-05 | 5.96e-03 | [-0.01,<br><0.01] |
| TOR_signPD_bradykinesia_hotspot_L  | -0.93    | -7.44e-05 | .464     | 4.02e-05 | 6.34e-03 | [-0.01,<br><0.01] |
| TOR_signPD_bradykinesia_hotspot_R  | -0.54    | -4.64e-05 | .895     | 1.39e-05 | 3.72e-03 | [-0.01,<br><0.01] |
| TOR_signPD_rigidity_coldspot_L     | -0.69    | -4.63e-05 | .596     | 2.26e-05 | 4.75e-03 | [-0.01,<br><0.01] |
| TOR_signPD_rigidity_coldspot_R     | -0.69    | -4.73e-05 | .597     | 2.25e-05 | 4.74e-03 | [-0.01,<br><0.01] |
| TOR_signPD_rigidity_hotspot_L      | -0.87    | -6.28e-05 | .468     | 3.57e-05 | 5.98e-03 | [-0.01,<br><0.01] |
| TOR_signPD_rigidity_hotspot_R      | -0.82    | -6.32e-05 | .647     | 3.16e-05 | 5.62e-03 | [-0.01,<br><0.01] |
| TOR_signPD_tremor_coldspot_L       | -0.16    | -1.16e-05 | 1.00     | 1.13e-06 | 1.06e-03 | [-0.01,<br><0.01] |
| TOR_signPD_tremor_coldspot_R       | -0.53    | -3.94e-05 | .823     | 1.30e-05 | 3.60e-03 | [-0.01,<br><0.01] |
| TOR_signPD_tremor_hotspot_L        | -0.17    | -1.40e-05 | .949     | 1.41e-06 | 1.19e-03 | [-0.01,<br><0.01] |

**Table S13**

*ET PRS Associations with grey matter axial diffusivity (AD) - LeadDBS\_Atlas\_compendium\_extended*

| Tract                       | <i>t</i> | $\beta$   | <i>p</i> | Eta2     | Cohens_f | 95% CI            |
|-----------------------------|----------|-----------|----------|----------|----------|-------------------|
| TOR_signPD_tremor_hotspot_R | -0.64    | -5.43e-05 | .615     | 1.91e-05 | 4.37e-03 | [-0.01,<br><0.01] |
| Zona_Incerta_Atlas_cZI_L    | -0.19    | -1.32e-05 | .938     | 1.62e-06 | 1.27e-03 | [-0.01,<br><0.01] |
| Zona_Incerta_Atlas_cZI_R    | -0.43    | -3.10e-05 | .813     | 8.79e-06 | 2.97e-03 | [-0.01,<br><0.01] |
| Zona_Incerta_Atlas_fct_L    | -0.16    | -1.19e-05 | 1.00     | 1.14e-06 | 1.07e-03 | [-0.01,<br><0.01] |
| Zona_Incerta_Atlas_fct_R    | -0.30    | -2.35e-05 | .934     | 4.21e-06 | 2.05e-03 | [-0.01,<br><0.01] |
| Zona_Incerta_Atlas_fl_L     | 0.08     | 7.80e-06  | 1.00     | 3.06e-07 | 5.53e-04 | [-0.01,<br><0.01] |
| Zona_Incerta_Atlas_fl_R     | -0.16    | -1.58e-05 | .998     | 1.14e-06 | 1.07e-03 | [-0.01,<br><0.01] |
| Zona_Incerta_Atlas_ft_L     | -0.13    | -1.17e-05 | 1.00     | 7.83e-07 | 8.85e-04 | [-0.01,<br><0.01] |
| Zona_Incerta_Atlas_ft_R     | -0.62    | -5.88e-05 | .738     | 1.82e-05 | 4.26e-03 | [-0.01,<br><0.01] |
| Zona_Incerta_Atlas_gm_mask  | -0.19    | -1.35e-05 | .953     | 1.64e-06 | 1.28e-03 | [-0.01,<br><0.01] |
| Zona_Incerta_Atlas_hf_L     | -0.19    | -1.90e-05 | .933     | 1.73e-06 | 1.31e-03 | [-0.01,<br><0.01] |
| Zona_Incerta_Atlas_hf_R     | -0.35    | -3.62e-05 | .796     | 5.87e-06 | 2.42e-03 | [-0.01,<br><0.01] |



**Table S13**

*ET PRS Associations with grey matter axial diffusivity (AD) - LeadDBS\_Atlas\_compendium\_extended*

| Tract                        | <i>t</i> | $\beta$   | <i>p</i> | Eta2     | Cohens_f | 95% CI            |
|------------------------------|----------|-----------|----------|----------|----------|-------------------|
| Zona_Incerta_Atlas_hfields_L | -0.07    | -6.58e-06 | 1.00     | 2.45e-07 | 4.95e-04 | [-0.01,<br><0.01] |
| Zona_Incerta_Atlas_hfields_R | -0.43    | -4.08e-05 | .737     | 8.53e-06 | 2.92e-03 | [-0.01,<br><0.01] |
| Zona_Incerta_Atlas_ml_L      | 0.31     | 2.06e-05  | .922     | 4.58e-06 | 2.14e-03 | [-0.01,<br><0.01] |
| Zona_Incerta_Atlas_ml_R      | -0.08    | -5.30e-06 | 1.00     | 3.27e-07 | 5.72e-04 | [-0.01,<br><0.01] |
| Zona_Incerta_Atlas_rZI_L     | -0.06    | -5.83e-06 | 1.00     | 1.97e-07 | 4.44e-04 | [-0.01,<br><0.01] |
| Zona_Incerta_Atlas_rZI_R     | -0.38    | -3.62e-05 | .784     | 6.87e-06 | 2.62e-03 | [-0.01,<br><0.01] |
| Zona_Incerta_Atlas_ZI_L      | -0.09    | -7.40e-06 | 1.00     | 4.12e-07 | 6.42e-04 | [-0.01,<br><0.01] |
| Zona_Incerta_Atlas_ZI_R      | -0.43    | -3.53e-05 | .761     | 8.53e-06 | 2.92e-03 | [-0.01,<br><0.01] |
| Zona_Incerta_Atlas_zRN_L     | -0.07    | -5.27e-06 | 1.00     | 2.26e-07 | 4.75e-04 | [-0.01,<br><0.01] |
| Zona_Incerta_Atlas_zRN_R     | 0.03     | 2.12e-06  | 1.00     | 3.54e-08 | 1.88e-04 | [-0.01,<br><0.01] |
| Zona_Incerta_Atlas_zSTN_L    | -0.71    | -6.27e-05 | .740     | 2.36e-05 | 4.86e-03 | [-0.01,<br><0.01] |
| Zona_Incerta_Atlas_zSTN_R    | -0.96    | -8.85e-05 | .454     | 4.29e-05 | 6.55e-03 | [-0.01,<br><0.01] |

*Note.*

**Table S13**

***ET PRS Associations with grey matter axial diffusivity (AD) - LeadDBS\_Atlas\_compendium\_extended***

| Tract | <i>t</i> | $\beta$ | <i>p</i> | Eta2 | Cohens_f | 95% CI |
|-------|----------|---------|----------|------|----------|--------|
|-------|----------|---------|----------|------|----------|--------|

\* *p* < .05, \*\* *p* < .01, \*\*\* *p* < .001, 95% CI(B)

**Table S14**

***ET PRS Lead DBS Extended Associations with grey matter diffusion magnetic resonance imaging (dMRI) – Mean Diffusivity (MD)***

| Tract                                                        | <i>t</i> | $\beta$   | CI_low    | CI_up    | <i>p</i> | Eta2     | Cohens_f |
|--------------------------------------------------------------|----------|-----------|-----------|----------|----------|----------|----------|
| AHEAD_Atlas_GPe_L.nii.gz                                     | 0.40     | 6.32e-05  | -2.47e-04 | 3.73e-04 | .941     | 7.47e-06 | 2.73e-03 |
| AHEAD_Atlas_GPe_R_mask.nii.gz                                | -0.09    | -1.43e-05 | -3.30e-04 | 3.01e-04 | 1.00     | 3.69e-07 | 6.08e-04 |
| AHEAD_Atlas_GPi_L_mask.nii.gz                                | -0.31    | -5.82e-05 | -4.21e-04 | 3.05e-04 | .912     | 4.62e-06 | 2.15e-03 |
| AHEAD_Atlas_GPi_R_mask.nii.gz                                | 0.03     | 6.05e-06  | -3.59e-04 | 3.71e-04 | 1.00     | 4.95e-08 | 2.22e-04 |
| AHEAD_Atlas_RN_L_mask.nii.gz                                 | -1.65    | -3.46e-04 | -7.59e-04 | 6.63e-05 | .157     | 1.27e-04 | 1.13e-02 |
| AHEAD_Atlas_RN_R_mask.nii.gz                                 | -1.29    | -2.79e-04 | -7.03e-04 | 1.46e-04 | .311     | 7.77e-05 | 8.82e-03 |
| AHEAD_Atlas_SN_L_mask.nii.gz                                 | -0.53    | -1.17e-04 | -5.49e-04 | 3.15e-04 | .842     | 1.32e-05 | 3.64e-03 |
| AHEAD_Atlas_SN_R_mask.nii.gz                                 | -1.16    | -2.41e-04 | -6.49e-04 | 1.66e-04 | .339     | 6.31e-05 | 7.95e-03 |
| AHEAD_Atlas_STN_L_mask.nii.gz                                | -1.19    | -3.06e-04 | -8.09e-04 | 1.98e-04 | .368     | 6.64e-05 | 8.15e-03 |
| AHEAD_Atlas_STN_R_mask.nii.gz                                | -0.78    | -2.10e-04 | -7.41e-04 | 3.21e-04 | .482     | 2.82e-05 | 5.31e-03 |
| Atlas_Basal_Ganglia_and_Thalamus_all_histo_label<br>s.nii.gz | 0.91     | 1.34e-04  | -1.55e-04 | 4.22e-04 | .401     | 3.85e-05 | 6.21e-03 |
| Atlas_Basal_Ganglia_and_Thalamus_L_Acc.nii.gz                | -0.21    | -3.94e-05 | -4.14e-04 | 3.35e-04 | .920     | 1.99e-06 | 1.41e-03 |
| Atlas_Basal_Ganglia_and_Thalamus_L_Cau-<br>ia.nii.gz         | 0.73     | 1.50e-04  | -2.54e-04 | 5.53e-04 | .514     | 2.48e-05 | 4.98e-03 |
| Atlas_Basal_Ganglia_and_Thalamus_L_Cau-<br>im.nii.gz         | 0.88     | 2.41e-04  | -2.94e-04 | 7.75e-04 | .415     | 3.65e-05 | 6.04e-03 |
| Atlas_Basal_Ganglia_and_Thalamus_L_Cau-<br>sa.nii.gz         | 1.37     | 4.99e-04  | -2.16e-04 | 1.21e-03 | .188     | 8.78e-05 | 9.37e-03 |

**Table S14**

***ET\_PRS Lead\_DBS Extended Associations with grey matter diffusion magnetic resonance imaging (dMRI) – Mean Diffusivity (MD)***

| Tract                                                   | <i>t</i>    | $\beta$         | CI_low          | CI_up           | <i>p</i>    | Eta2            | Cohens_f        |
|---------------------------------------------------------|-------------|-----------------|-----------------|-----------------|-------------|-----------------|-----------------|
| Atlas_Basal_Ganglia_and_Thalamus_L_Cau-sp.nii.gz        | 1.66        | 5.38e-04        | -9.79e-05       | 1.17e-03        | .119        | 1.29e-04        | 1.14e-02        |
| Atlas_Basal_Ganglia_and_Thalamus_L_GPe.nii.gz           | -0.30       | -5.31e-05       | -3.98e-04       | 2.91e-04        | .907        | 4.28e-06        | 2.07e-03        |
| Atlas_Basal_Ganglia_and_Thalamus_L_GP_i.nii.gz          | -0.62       | -1.05e-04       | -4.39e-04       | 2.29e-04        | .740        | 1.78e-05        | 4.21e-03        |
| Atlas_Basal_Ganglia_and_Thalamus_L_Put-ia.nii.gz        | 0.18        | 2.90e-05        | -2.82e-04       | 3.40e-04        | .950        | 1.57e-06        | 1.25e-03        |
| Atlas_Basal_Ganglia_and_Thalamus_L_Put-im.nii.gz        | -0.17       | -2.42e-05       | -3.12e-04       | 2.63e-04        | .956        | 1.28e-06        | 1.13e-03        |
| Atlas_Basal_Ganglia_and_Thalamus_L_Put-sa.nii.gz        | 1.00        | 1.46e-04        | -1.40e-04       | 4.31e-04        | .387        | 4.70e-05        | 6.86e-03        |
| Atlas_Basal_Ganglia_and_Thalamus_L_Put-sm.nii.gz        | 1.00        | 1.40e-04        | -1.34e-04       | 4.14e-04        | .436        | 4.69e-05        | 6.85e-03        |
| Atlas_Basal_Ganglia_and_Thalamus_L_Put-sp.nii.gz        | <0.01       | 7.30e-07        | -2.99e-04       | 3.01e-04        | 1.00        | 1.07e-09        | 3.27e-05        |
| Atlas_Basal_Ganglia_and_Thalamus_L_SN.nii.gz            | -0.67       | -1.53e-04       | -6.03e-04       | 2.96e-04        | .626        | 2.10e-05        | 4.58e-03        |
| Atlas_Basal_Ganglia_and_Thalamus_L_STN.nii.gz           | -1.11       | -2.72e-04       | -7.54e-04       | 2.10e-04        | .422        | 5.74e-05        | 7.57e-03        |
| Atlas_Basal_Ganglia_and_Thalamus_L_Tha-a.nii.gz         | 1.18        | 2.37e-04        | -1.58e-04       | 6.32e-04        | .293        | 6.48e-05        | 8.05e-03        |
| <b>Atlas_Basal_Ganglia_and_Thalamus_L_Tha-ld.nii.gz</b> | <b>2.18</b> | <b>3.71e-04</b> | <b>3.72e-05</b> | <b>7.05e-04</b> | <b>.040</b> | <b>2.22e-04</b> | <b>1.49e-02</b> |
| Atlas_Basal_Ganglia_and_Thalamus_L_Tha-lp.nii.gz        | 1.95        | 3.12e-04        | -1.03e-06       | 6.26e-04        | .062        | 1.79e-04        | 1.34e-02        |
| Atlas_Basal_Ganglia_and_Thalamus_L_Tha-lpu.nii.gz       | -0.15       | -2.52e-05       | -3.51e-04       | 3.00e-04        | .967        | 1.08e-06        | 1.04e-03        |
| <b>Atlas_Basal_Ganglia_and_Thalamus_L_Tha-md.nii.gz</b> | <b>2.12</b> | <b>5.79e-04</b> | <b>4.37e-05</b> | <b>1.11e-03</b> | <b>.047</b> | <b>2.11e-04</b> | <b>1.45e-02</b> |

**Table S14**

***ET\_PRS Lead\_DBS Extended Associations with grey matter diffusion magnetic resonance imaging (dMRI) – Mean Diffusivity (MD)***

| Tract                                             | <i>t</i> | $\beta$   | CI_low    | CI_up    | <i>p</i> | Eta2     | Cohens_f |
|---------------------------------------------------|----------|-----------|-----------|----------|----------|----------|----------|
| Atlas_Basal_Ganglia_and_Thalamus_L_Tha-mpu.nii.gz | 1.70     | 3.80e-04  | -5.86e-05 | 8.19e-04 | .109     | 1.35e-04 | 1.16e-02 |
| Atlas_Basal_Ganglia_and_Thalamus_L_Tha-vp.nii.gz  | 1.05     | 1.45e-04  | -1.26e-04 | 4.15e-04 | .405     | 5.16e-05 | 7.18e-03 |
| Atlas_Basal_Ganglia_and_Thalamus_R_Acc.nii.gz     | -0.74    | -1.44e-04 | -5.29e-04 | 2.40e-04 | .564     | 2.54e-05 | 5.04e-03 |
| Atlas_Basal_Ganglia_and_Thalamus_R_Cau-ia.nii.gz  | -0.10    | -2.30e-05 | -4.83e-04 | 4.37e-04 | 1.00     | 4.50e-07 | 6.71e-04 |
| Atlas_Basal_Ganglia_and_Thalamus_R_Cau-im.nii.gz  | 0.45     | 1.20e-04  | -4.05e-04 | 6.45e-04 | .720     | 9.40e-06 | 3.07e-03 |
| Atlas_Basal_Ganglia_and_Thalamus_R_Cau-sa.nii.gz  | 0.61     | 2.04e-04  | -4.49e-04 | 8.58e-04 | .594     | 1.76e-05 | 4.19e-03 |
| Atlas_Basal_Ganglia_and_Thalamus_R_Cau-sp.nii.gz  | 1.33     | 4.03e-04  | -1.91e-04 | 9.98e-04 | .202     | 8.29e-05 | 9.10e-03 |
| Atlas_Basal_Ganglia_and_Thalamus_R_GPe.nii.gz     | 0.24     | 4.16e-05  | -3.00e-04 | 3.84e-04 | .893     | 2.66e-06 | 1.63e-03 |
| Atlas_Basal_Ganglia_and_Thalamus_R_GPi.nii.gz     | -0.35    | -5.99e-05 | -3.97e-04 | 2.77e-04 | .800     | 5.70e-06 | 2.39e-03 |
| Atlas_Basal_Ganglia_and_Thalamus_R_Put-ia.nii.gz  | -0.60    | -9.70e-05 | -4.14e-04 | 2.20e-04 | .603     | 1.69e-05 | 4.11e-03 |
| Atlas_Basal_Ganglia_and_Thalamus_R_Put-im.nii.gz  | 0.05     | 7.20e-06  | -2.67e-04 | 2.81e-04 | 1.00     | 1.24e-07 | 3.52e-04 |
| Atlas_Basal_Ganglia_and_Thalamus_R_Put-sa.nii.gz  | 0.85     | 1.20e-04  | -1.56e-04 | 3.96e-04 | .433     | 3.41e-05 | 5.84e-03 |
| Atlas_Basal_Ganglia_and_Thalamus_R_Put-sm.nii.gz  | 1.10     | 1.51e-04  | -1.18e-04 | 4.19e-04 | .332     | 5.67e-05 | 7.53e-03 |
| Atlas_Basal_Ganglia_and_Thalamus_R_Put-sp.nii.gz  | 0.56     | 8.02e-05  | -2.01e-04 | 3.61e-04 | .767     | 1.47e-05 | 3.83e-03 |

Table S14

*ET\_PRS Lead\_DBS Extended Associations with grey matter diffusion magnetic resonance imaging (dMRI) – Mean Diffusivity (MD)*

| Tract                                             | <i>t</i>    | $\beta$         | CI_low          | CI_up           | <i>p</i>    | Eta2            | Cohens_f        |
|---------------------------------------------------|-------------|-----------------|-----------------|-----------------|-------------|-----------------|-----------------|
| Atlas_Basal_Ganglia_and_Thalamus_R_SN.nii.gz      | -1.52       | -3.55e-04       | -8.12e-04       | 1.02e-04        | .200        | 1.09e-04        | 1.04e-02        |
| Atlas_Basal_Ganglia_and_Thalamus_R_STN.nii.gz     | -0.87       | -2.31e-04       | -7.51e-04       | 2.89e-04        | .469        | 3.56e-05        | 5.96e-03        |
| Atlas_Basal_Ganglia_and_Thalamus_R_Tha-a.nii.gz   | 0.39        | 6.77e-05        | -2.75e-04       | 4.11e-04        | .769        | 7.02e-06        | 2.65e-03        |
| Atlas_Basal_Ganglia_and_Thalamus_R_Tha-ld.nii.gz  | 1.57        | 2.63e-04        | -6.58e-05       | 5.91e-04        | .129        | 1.15e-04        | 1.07e-02        |
| Atlas_Basal_Ganglia_and_Thalamus_R_Tha-lp.nii.gz  | 1.66        | 2.12e-04        | -3.76e-05       | 4.62e-04        | .132        | 1.30e-04        | 1.14e-02        |
| Atlas_Basal_Ganglia_and_Thalamus_R_Tha-lpu.nii.gz | 1.08        | 1.92e-04        | -1.55e-04       | 5.39e-04        | .307        | 5.50e-05        | 7.42e-03        |
| Atlas_Basal_Ganglia_and_Thalamus_R_Tha-md.nii.gz  | 1.10        | 1.94e-04        | -1.52e-04       | 5.40e-04        | .331        | 5.68e-05        | 7.54e-03        |
| Atlas_Basal_Ganglia_and_Thalamus_R_Tha-mpu.nii.gz | 1.68        | 4.14e-04        | -6.80e-05       | 8.96e-04        | .113        | 1.33e-04        | 1.15e-02        |
| Atlas_Basal_Ganglia_and_Thalamus_R_Tha-vp.nii.gz  | 0.34        | 4.78e-05        | -2.25e-04       | 3.20e-04        | .804        | 5.54e-06        | 2.35e-03        |
| DISTAL_L_1.nii.gz                                 | 1.07        | 1.70e-04        | -1.41e-04       | 4.81e-04        | .313        | 5.36e-05        | 7.32e-03        |
| DISTAL_L_100.nii.gz                               | 1.73        | 3.44e-04        | -4.67e-05       | 7.36e-04        | .103        | 1.40e-04        | 1.18e-02        |
| <b>DISTAL_L_101.nii.gz</b>                        | <b>2.29</b> | <b>4.74e-04</b> | <b>6.76e-05</b> | <b>8.80e-04</b> | <b>.031</b> | <b>2.45e-04</b> | <b>1.57e-02</b> |
| DISTAL_L_105.nii.gz                               | 1.45        | 3.46e-04        | -1.22e-04       | 8.15e-04        | .224        | 9.83e-05        | 9.91e-03        |
| DISTAL_L_106.nii.gz                               | 0.91        | 1.97e-04        | -2.29e-04       | 6.24e-04        | .401        | 3.85e-05        | 6.21e-03        |
| DISTAL_L_107.nii.gz                               | 0.03        | 5.01e-06        | -3.17e-04       | 3.27e-04        | 1.00        | 4.36e-08        | 2.09e-04        |
| DISTAL_L_108.nii.gz                               | 0.36        | 7.67e-05        | -3.43e-04       | 4.96e-04        | .792        | 6.02e-06        | 2.45e-03        |
| DISTAL_L_109.nii.gz                               | 1.63        | 5.97e-04        | -1.20e-04       | 1.31e-03        | .226        | 1.25e-04        | 1.12e-02        |

Table S14

*ET\_PRS Lead\_DBs Extended Associations with grey matter diffusion magnetic resonance imaging (dMRI) – Mean Diffusivity (MD)*

| Tract                     | <i>t</i>    | $\beta$         | CI_low          | CI_up           | <i>p</i>    | Eta2            | Cohens_f        |
|---------------------------|-------------|-----------------|-----------------|-----------------|-------------|-----------------|-----------------|
| DISTAL_L_110.nii.gz       | -0.15       | -1.80e-05       | -2.58e-04       | 2.22e-04        | .971        | 1.02e-06        | 1.01e-03        |
| DISTAL_L_111.nii.gz       | 1.35        | 2.47e-04        | -1.11e-04       | 6.05e-04        | .216        | 8.55e-05        | 9.25e-03        |
| DISTAL_L_112.nii.gz       | 0.79        | 1.10e-04        | -1.65e-04       | 3.85e-04        | .475        | 2.89e-05        | 5.38e-03        |
| DISTAL_L_118.nii.gz       | 0.57        | 9.22e-05        | -2.27e-04       | 4.11e-04        | .628        | 1.51e-05        | 3.88e-03        |
| DISTAL_L_14.nii.gz        | -0.86       | -1.40e-04       | -4.60e-04       | 1.80e-04        | .537        | 3.46e-05        | 5.88e-03        |
| DISTAL_L_16.nii.gz        | 1.26        | 6.01e-04        | -3.35e-04       | 1.54e-03        | .272        | 7.42e-05        | 8.62e-03        |
| DISTAL_L_2.nii.gz         | 0.50        | 7.09e-05        | -2.08e-04       | 3.50e-04        | .681        | 1.16e-05        | 3.41e-03        |
| DISTAL_L_24.nii.gz        | -0.70       | -1.40e-04       | -5.35e-04       | 2.54e-04        | .668        | 2.28e-05        | 4.77e-03        |
| DISTAL_L_26.nii.gz        | 0.40        | 6.72e-05        | -2.61e-04       | 3.95e-04        | .757        | 7.57e-06        | 2.75e-03        |
| DISTAL_L_28.nii.gz        | 1.63        | 6.60e-04        | -1.36e-04       | 1.46e-03        | .114        | 1.24e-04        | 1.11e-02        |
| DISTAL_L_29.nii.gz        | 0.60        | 2.36e-04        | -5.40e-04       | 1.01e-03        | .673        | 1.67e-05        | 4.09e-03        |
| <b>DISTAL_L_35.nii.gz</b> | <b>2.28</b> | <b>1.11e-03</b> | <b>1.54e-04</b> | <b>2.07e-03</b> | <b>.031</b> | <b>2.43e-04</b> | <b>1.56e-02</b> |
| DISTAL_L_36.nii.gz        | 0.45        | 5.92e-05        | -1.96e-04       | 3.14e-04        | .714        | 9.68e-06        | 3.11e-03        |
| <b>DISTAL_L_37.nii.gz</b> | <b>2.57</b> | <b>6.72e-04</b> | <b>1.60e-04</b> | <b>1.18e-03</b> | <b>.016</b> | <b>3.10e-04</b> | <b>1.76e-02</b> |
| DISTAL_L_4.nii.gz         | 0.07        | 7.90e-06        | -2.12e-04       | 2.28e-04        | 1.00        | 2.32e-07        | 4.82e-04        |
| DISTAL_L_40.nii.gz        | -0.05       | -1.14e-05       | -4.71e-04       | 4.48e-04        | 1.00        | 1.10e-07        | 3.32e-04        |
| DISTAL_L_47.nii.gz        | -0.60       | -1.31e-04       | -5.62e-04       | 3.00e-04        | .674        | 1.66e-05        | 4.08e-03        |
| DISTAL_L_49.nii.gz        | 1.26        | 1.89e-04        | -1.04e-04       | 4.81e-04        | .284        | 7.49e-05        | 8.65e-03        |
| DISTAL_L_6.nii.gz         | -0.71       | -9.90e-05       | -3.71e-04       | 1.73e-04        | .523        | 2.39e-05        | 4.89e-03        |
| DISTAL_L_60.nii.gz        | 0.45        | 7.37e-05        | -2.48e-04       | 3.95e-04        | .991        | 9.46e-06        | 3.08e-03        |
| DISTAL_L_63.nii.gz        | -0.23       | -6.64e-05       | -6.33e-04       | 5.00e-04        | .900        | 2.47e-06        | 1.57e-03        |
| DISTAL_L_68.nii.gz        | -0.36       | -8.95e-05       | -5.74e-04       | 3.95e-04        | .877        | 6.13e-06        | 2.48e-03        |
| DISTAL_L_7.nii.gz         | 0.96        | 2.24e-04        | -2.34e-04       | 6.81e-04        | .465        | 4.30e-05        | 6.56e-03        |

Table S14

*ET\_PRS Lead\_DBs Extended Associations with grey matter diffusion magnetic resonance imaging (dMRI) – Mean Diffusivity (MD)*

| Tract                            | <i>t</i>    | $\beta$         | CI_low          | CI_up           | <i>p</i>    | Eta2            | Cohens_f        |
|----------------------------------|-------------|-----------------|-----------------|-----------------|-------------|-----------------|-----------------|
| DISTAL_L_70.nii.gz               | 0.03        | 7.25e-06        | -4.20e-04       | 4.35e-04        | 1.00        | 5.17e-08        | 2.27e-04        |
| DISTAL_L_76.nii.gz               | 1.01        | 1.53e-04        | -1.43e-04       | 4.48e-04        | .342        | 4.81e-05        | 6.94e-03        |
| DISTAL_L_8.nii.gz                | -0.97       | -1.48e-04       | -4.48e-04       | 1.51e-04        | .456        | 4.41e-05        | 6.64e-03        |
| DISTAL_L_86.nii.gz               | 0.83        | 1.47e-04        | -2.02e-04       | 4.96e-04        | .641        | 3.21e-05        | 5.67e-03        |
| DISTAL_L_87.nii.gz               | 0.95        | 1.57e-04        | -1.67e-04       | 4.81e-04        | .520        | 4.24e-05        | 6.51e-03        |
| DISTAL_L_89.nii.gz               | 0.06        | 1.10e-05        | -3.66e-04       | 3.88e-04        | 1.00        | 1.54e-07        | 3.92e-04        |
| DISTAL_L_91.nii.gz               | 1.97        | 3.02e-04        | 1.07e-06        | 6.03e-04        | .090        | 1.81e-04        | 1.35e-02        |
| DISTAL_L_92.nii.gz               | 1.74        | 2.19e-04        | -2.76e-05       | 4.66e-04        | .112        | 1.42e-04        | 1.19e-02        |
| DISTAL_L_93.nii.gz               | 1.41        | 2.10e-04        | -8.26e-05       | 5.03e-04        | .195        | 9.28e-05        | 9.63e-03        |
| DISTAL_L_94.nii.gz               | 1.12        | 1.52e-04        | -1.13e-04       | 4.18e-04        | .364        | 5.92e-05        | 7.69e-03        |
| DISTAL_L_97.nii.gz               | 2.06        | 2.83e-04        | 1.35e-05        | 5.52e-04        | .062        | 1.99e-04        | 1.41e-02        |
| <b>DISTAL_L_98.nii.gz</b>        | <b>2.61</b> | <b>3.74e-04</b> | <b>9.29e-05</b> | <b>6.56e-04</b> | <b>.020</b> | <b>3.18e-04</b> | <b>1.78e-02</b> |
| DISTAL_L_GPe.nii.gz              | -0.04       | -8.29e-06       | -3.95e-04       | 3.79e-04        | 1.00        | 8.27e-08        | 2.88e-04        |
| DISTAL_L_GPi_sensorimotor.nii.gz | -0.34       | -5.04e-05       | -3.42e-04       | 2.41e-04        | .808        | 5.39e-06        | 2.32e-03        |
| DISTAL_L_GPi.nii.gz              | -0.46       | -1.00e-04       | -5.31e-04       | 3.30e-04        | .772        | 9.78e-06        | 3.13e-03        |
| DISTAL_L_RN.nii.gz               | -1.78       | -3.78e-04       | -7.94e-04       | 3.84e-05        | .138        | 1.48e-04        | 1.22e-02        |
| DISTAL_L_STN_associative.nii.gz  | -1.35       | -3.91e-04       | -9.61e-04       | 1.79e-04        | .245        | 8.49e-05        | 9.21e-03        |
| DISTAL_L_STN_limbic.nii.gz       | -0.49       | -1.53e-04       | -7.71e-04       | 4.64e-04        | .689        | 1.11e-05        | 3.33e-03        |
| DISTAL_L_STN_motor.nii.gz        | -1.30       | -3.12e-04       | -7.84e-04       | 1.59e-04        | .356        | 7.90e-05        | 8.89e-03        |
| DISTAL_L_STN.nii.gz              | -1.36       | -3.75e-04       | -9.16e-04       | 1.66e-04        | .245        | 8.65e-05        | 9.30e-03        |
| DISTAL_R_1.nii.gz                | 0.73        | 1.25e-04        | -2.13e-04       | 4.64e-04        | .514        | 2.47e-05        | 4.97e-03        |
| DISTAL_R_100.nii.gz              | 1.97        | 3.67e-04        | 2.44e-06        | 7.32e-04        | .067        | 1.82e-04        | 1.35e-02        |
| DISTAL_R_101.nii.gz              | 1.98        | 3.76e-04        | 3.72e-06        | 7.48e-04        | .058        | 1.84e-04        | 1.36e-02        |

**Table S14**

***ET\_PRS Lead\_DBS Extended Associations with grey matter diffusion magnetic resonance imaging (dMRI) – Mean Diffusivity (MD)***

| Tract               | <i>t</i> | $\beta$   | CI_low    | CI_up    | <i>p</i> | Eta2     | Cohens_f |
|---------------------|----------|-----------|-----------|----------|----------|----------|----------|
| DISTAL_R_105.nii.gz | 0.15     | 4.01e-05  | -4.88e-04 | 5.68e-04 | .970     | 1.04e-06 | 1.02e-03 |
| DISTAL_R_106.nii.gz | 0.89     | 1.93e-04  | -2.34e-04 | 6.21e-04 | .460     | 3.69e-05 | 6.07e-03 |
| DISTAL_R_107.nii.gz | 0.72     | 1.26e-04  | -2.17e-04 | 4.69e-04 | .520     | 2.42e-05 | 4.91e-03 |
| DISTAL_R_108.nii.gz | 0.22     | 4.87e-05  | -3.80e-04 | 4.77e-04 | .906     | 2.33e-06 | 1.53e-03 |
| DISTAL_R_109.nii.gz | 1.71     | 6.27e-04  | -9.33e-05 | 1.35e-03 | .194     | 1.36e-04 | 1.17e-02 |
| DISTAL_R_110.nii.gz | -0.01    | -6.13e-07 | -2.40e-04 | 2.39e-04 | 1.00     | 1.18e-09 | 3.44e-05 |
| DISTAL_R_111.nii.gz | 1.55     | 3.40e-04  | -9.05e-05 | 7.70e-04 | .134     | 1.12e-04 | 1.06e-02 |
| DISTAL_R_112.nii.gz | 0.64     | 9.14e-05  | -1.90e-04 | 3.73e-04 | .577     | 1.90e-05 | 4.36e-03 |
| DISTAL_R_118.nii.gz | -0.20    | -3.40e-05 | -3.60e-04 | 2.92e-04 | 1.00     | 1.97e-06 | 1.40e-03 |
| DISTAL_R_13.nii.gz  | -0.78    | -2.44e-04 | -8.57e-04 | 3.68e-04 | .683     | 2.86e-05 | 5.35e-03 |
| DISTAL_R_14.nii.gz  | -1.36    | -2.16e-04 | -5.26e-04 | 9.45e-05 | .238     | 8.71e-05 | 9.33e-03 |
| DISTAL_R_16.nii.gz  | 1.84     | 8.85e-04  | -5.93e-05 | 1.83e-03 | .104     | 1.58e-04 | 1.26e-02 |
| DISTAL_R_2.nii.gz   | 0.20     | 2.67e-05  | -2.40e-04 | 2.94e-04 | .929     | 1.81e-06 | 1.34e-03 |
| DISTAL_R_24.nii.gz  | -0.44    | -8.31e-05 | -4.50e-04 | 2.84e-04 | .758     | 9.24e-06 | 3.04e-03 |
| DISTAL_R_26.nii.gz  | 0.51     | 8.72e-05  | -2.45e-04 | 4.19e-04 | .667     | 1.24e-05 | 3.52e-03 |
| DISTAL_R_28.nii.gz  | 1.25     | 5.06e-04  | -2.89e-04 | 1.30e-03 | .239     | 7.30e-05 | 8.54e-03 |
| DISTAL_R_29.nii.gz  | 0.33     | 1.30e-04  | -6.33e-04 | 8.93e-04 | .840     | 5.19e-06 | 2.28e-03 |
| DISTAL_R_35.nii.gz  | 1.37     | 6.66e-04  | -2.88e-04 | 1.62e-03 | .188     | 8.78e-05 | 9.37e-03 |
| DISTAL_R_36.nii.gz  | 0.80     | 1.10e-04  | -1.60e-04 | 3.79e-04 | .468     | 2.98e-05 | 5.46e-03 |
| DISTAL_R_37.nii.gz  | 1.73     | 4.51e-04  | -6.03e-05 | 9.63e-04 | .092     | 1.40e-04 | 1.18e-02 |
| DISTAL_R_4.nii.gz   | -0.01    | -1.37e-06 | -2.24e-04 | 2.21e-04 | 1.00     | 6.77e-09 | 8.23e-05 |
| DISTAL_R_40.nii.gz  | -0.90    | -2.19e-04 | -6.98e-04 | 2.60e-04 | .509     | 3.76e-05 | 6.13e-03 |
| DISTAL_R_47.nii.gz  | -1.15    | -2.40e-04 | -6.48e-04 | 1.68e-04 | .392     | 6.22e-05 | 7.89e-03 |



**Table S14**

***ET\_PRS Lead\_DBs Extended Associations with grey matter diffusion magnetic resonance imaging (dMRI) – Mean Diffusivity (MD)***

| Tract                             | <i>t</i> | $\beta$   | CI_low    | CI_up    | <i>p</i> | Eta2     | Cohens_f |
|-----------------------------------|----------|-----------|-----------|----------|----------|----------|----------|
| DISTAL_R_49.nii.gz                | 1.36     | 2.07e-04  | -9.11e-05 | 5.06e-04 | .318     | 8.69e-05 | 9.32e-03 |
| DISTAL_R_6.nii.gz                 | -0.56    | -7.51e-05 | -3.39e-04 | 1.89e-04 | .706     | 1.46e-05 | 3.82e-03 |
| DISTAL_R_60.nii.gz                | 0.90     | 1.55e-04  | -1.82e-04 | 4.92e-04 | .480     | 3.81e-05 | 6.17e-03 |
| DISTAL_R_63.nii.gz                | -0.19    | -4.83e-05 | -5.44e-04 | 4.47e-04 | .933     | 1.71e-06 | 1.31e-03 |
| DISTAL_R_68.nii.gz                | -0.26    | -6.78e-05 | -5.72e-04 | 4.36e-04 | .871     | 3.26e-06 | 1.81e-03 |
| DISTAL_R_7.nii.gz                 | 0.67     | 1.59e-04  | -3.06e-04 | 6.24e-04 | .613     | 2.12e-05 | 4.60e-03 |
| DISTAL_R_70.nii.gz                | 0.97     | 1.86e-04  | -1.89e-04 | 5.60e-04 | .364     | 4.43e-05 | 6.65e-03 |
| DISTAL_R_76.nii.gz                | 1.40     | 2.02e-04  | -8.16e-05 | 4.86e-04 | .256     | 9.14e-05 | 9.56e-03 |
| DISTAL_R_8.nii.gz                 | -0.81    | -1.20e-04 | -4.11e-04 | 1.70e-04 | .574     | 3.09e-05 | 5.56e-03 |
| DISTAL_R_86.nii.gz                | 0.74     | 1.43e-04  | -2.38e-04 | 5.25e-04 | .635     | 2.54e-05 | 5.04e-03 |
| DISTAL_R_87.nii.gz                | 0.65     | 1.15e-04  | -2.32e-04 | 4.63e-04 | .630     | 1.98e-05 | 4.45e-03 |
| DISTAL_R_89.nii.gz                | 0.49     | 9.52e-05  | -2.89e-04 | 4.79e-04 | .690     | 1.11e-05 | 3.33e-03 |
| DISTAL_R_91.nii.gz                | 0.79     | 1.27e-04  | -1.87e-04 | 4.41e-04 | .525     | 2.93e-05 | 5.41e-03 |
| DISTAL_R_92.nii.gz                | 0.59     | 7.86e-05  | -1.82e-04 | 3.40e-04 | .611     | 1.63e-05 | 4.04e-03 |
| DISTAL_R_93.nii.gz                | 1.48     | 2.34e-04  | -7.58e-05 | 5.44e-04 | .152     | 1.03e-04 | 1.01e-02 |
| DISTAL_R_94.nii.gz                | -0.14    | -1.87e-05 | -2.82e-04 | 2.44e-04 | .978     | 9.10e-07 | 9.54e-04 |
| DISTAL_R_97.nii.gz                | 1.28     | 1.71e-04  | -9.08e-05 | 4.33e-04 | .315     | 7.68e-05 | 8.76e-03 |
| DISTAL_R_GPe.nii.gz               | 0.29     | 5.77e-05  | -3.26e-04 | 4.42e-04 | .845     | 4.07e-06 | 2.02e-03 |
| DISTAL_R_GP_i_sensorimotor.nii.gz | -0.48    | -7.24e-05 | -3.69e-04 | 2.25e-04 | .696     | 1.07e-05 | 3.27e-03 |
| DISTAL_R_GP_i.nii.gz              | -0.09    | -2.05e-05 | -4.53e-04 | 4.12e-04 | 1.00     | 4.05e-07 | 6.36e-04 |
| DISTAL_R_RN.nii.gz                | -1.09    | -2.43e-04 | -6.83e-04 | 1.96e-04 | .436     | 5.52e-05 | 7.43e-03 |
| DISTAL_R_STN_associative.nii.gz   | -0.72    | -2.20e-04 | -8.16e-04 | 3.76e-04 | .568     | 2.45e-05 | 4.95e-03 |
| DISTAL_R_STN_limbic.nii.gz        | -1.95    | -6.27e-04 | -1.26e-03 | 2.00e-06 | .112     | 1.79e-04 | 1.34e-02 |

Table S14

*ET\_PRS Lead\_DBS Extended Associations with grey matter diffusion magnetic resonance imaging (dMRI) – Mean Diffusivity (MD)*

| Tract                                        | $t$         | $\beta$         | CI_low          | CI_up           | $p$         | Eta2            | Cohens_f        |
|----------------------------------------------|-------------|-----------------|-----------------|-----------------|-------------|-----------------|-----------------|
| DISTAL_R_STN_motor.nii.gz                    | -0.62       | -1.63e-04       | -6.82e-04       | 3.55e-04        | .591        | 1.79e-05        | 4.23e-03        |
| DISTAL_R_STN.nii.gz                          | -0.80       | -2.32e-04       | -8.00e-04       | 3.37e-04        | .467        | 2.98e-05        | 5.46e-03        |
| Human_Motor_Thalamus_L_A.nii.gz              | 1.68        | 6.39e-04        | -1.08e-04       | 1.39e-03        | .103        | 1.32e-04        | 1.15e-02        |
| Human_Motor_Thalamus_L_acbcbasc.nii.gz       | -0.73       | -1.21e-04       | -4.45e-04       | 2.03e-04        | .568        | 2.51e-05        | 5.01e-03        |
| Human_Motor_Thalamus_L_alfrxmtpc.nii.gz      | 1.72        | 4.68e-04        | -6.63e-05       | 1.00e-03        | .095        | 1.38e-04        | 1.18e-02        |
| Human_Motor_Thalamus_L_BasalForebrain.nii.gz | 0.13        | 2.63e-05        | -3.67e-04       | 4.20e-04        | .985        | 8.03e-07        | 8.96e-04        |
| Human_Motor_Thalamus_L_CdPutVSt.nii.gz       | 1.17        | 1.87e-04        | -1.26e-04       | 5.00e-04        | .266        | 6.43e-05        | 8.02e-03        |
| Human_Motor_Thalamus_L_CMPf.nii.gz           | 1.22        | 1.79e-04        | -1.09e-04       | 4.67e-04        | .351        | 6.94e-05        | 8.33e-03        |
| Human_Motor_Thalamus_L_eml.nii.gz            | -0.13       | -2.92e-05       | -4.74e-04       | 4.16e-04        | 1.00        | 7.76e-07        | 8.81e-04        |
| Human_Motor_Thalamus_L_GPI.nii.gz            | -0.13       | -2.23e-05       | -3.71e-04       | 3.27e-04        | .990        | 7.35e-07        | 8.57e-04        |
| Human_Motor_Thalamus_L_GPm.nii.gz            | -0.39       | -7.49e-05       | -4.49e-04       | 3.00e-04        | .765        | 7.19e-06        | 2.68e-03        |
| Human_Motor_Thalamus_L_Hbl.nii.gz            | 2.08        | 1.11e-03        | 6.32e-05        | 2.16e-03        | .052        | 2.02e-04        | 1.42e-02        |
| Human_Motor_Thalamus_L_Hypothalamus.nii.gz   | 0.74        | 1.71e-04        | -2.80e-04       | 6.22e-04        | .721        | 2.58e-05        | 5.07e-03        |
| Human_Motor_Thalamus_L_ic.nii.gz             | 1.35        | 2.03e-04        | -9.24e-05       | 4.99e-04        | .245        | 8.51e-05        | 9.22e-03        |
| <b>Human_Motor_Thalamus_L_LD.nii.gz</b>      | <b>2.54</b> | <b>1.29e-03</b> | <b>2.96e-04</b> | <b>2.29e-03</b> | <b>.017</b> | <b>3.02e-04</b> | <b>1.74e-02</b> |
| Human_Motor_Thalamus_L_LG.nii.gz             | 0.63        | 1.25e-04        | -2.63e-04       | 5.13e-04        | .605        | 1.86e-05        | 4.31e-03        |
| Human_Motor_Thalamus_L_Li.nii.gz             | 1.22        | 2.15e-04        | -1.30e-04       | 5.60e-04        | .244        | 7.00e-05        | 8.36e-03        |
| Human_Motor_Thalamus_L_M.nii.gz              | 0.11        | 2.66e-05        | -4.57e-04       | 5.11e-04        | 1.00        | 5.44e-07        | 7.37e-04        |
| Human_Motor_Thalamus_L_MB.nii.gz             | 0.83        | 3.71e-04        | -5.03e-04       | 1.24e-03        | .558        | 3.24e-05        | 5.69e-03        |
| Human_Motor_Thalamus_L_MD.nii.gz             | 2.12        | 4.36e-04        | 3.21e-05        | 8.40e-04        | .054        | 2.10e-04        | 1.45e-02        |
| Human_Motor_Thalamus_L_MDCL.nii.gz           | 2.04        | 3.08e-04        | 1.22e-05        | 6.04e-04        | .057        | 1.95e-04        | 1.40e-02        |
| Human_Motor_Thalamus_L_MG.nii.gz             | -0.13       | -3.39e-05       | -5.47e-04       | 4.79e-04        | 1.00        | 7.86e-07        | 8.87e-04        |
| Human_Motor_Thalamus_L_MI.nii.gz             | -0.33       | -1.27e-04       | -8.90e-04       | 6.36e-04        | .819        | 4.99e-06        | 2.23e-03        |

**Table S14**

***ET\_PRS Lead\_DBS Extended Associations with grey matter diffusion magnetic resonance imaging (dMRI) – Mean Diffusivity (MD)***

| Tract                                          | <i>t</i> | $\beta$   | CI_low    | CI_up    | <i>p</i> | Eta2     | Cohens_f |
|------------------------------------------------|----------|-----------|-----------|----------|----------|----------|----------|
| Human_Motor_Thalamus_L_Midbrain.nii.gz         | 0.61     | 8.67e-05  | -1.90e-04 | 3.64e-04 | .593     | 1.77e-05 | 4.20e-03 |
| Human_Motor_Thalamus_L_ot.nii.gz               | -0.14    | -2.77e-05 | -4.29e-04 | 3.73e-04 | .982     | 8.57e-07 | 9.26e-04 |
| Human_Motor_Thalamus_L_Po.nii.gz               | 0.01     | 1.85e-06  | -3.47e-04 | 3.51e-04 | 1.00     | 5.04e-09 | 7.10e-05 |
| Human_Motor_Thalamus_L_PPN.nii.gz              | -0.18    | -4.30e-05 | -5.23e-04 | 4.37e-04 | .946     | 1.45e-06 | 1.20e-03 |
| Human_Motor_Thalamus_L_Pul.nii.gz              | 1.11     | 1.81e-04  | -1.39e-04 | 5.00e-04 | .294     | 5.76e-05 | 7.59e-03 |
| Human_Motor_Thalamus_L_R.nii.gz                | -1.83    | -3.78e-04 | -7.84e-04 | 2.78e-05 | .124     | 1.56e-04 | 1.25e-02 |
| Human_Motor_Thalamus_L_Rt.nii.gz               | -0.26    | -3.41e-05 | -2.90e-04 | 2.22e-04 | .874     | 3.19e-06 | 1.79e-03 |
| Human_Motor_Thalamus_L_SN.nii.gz               | -0.64    | -1.36e-04 | -5.53e-04 | 2.82e-04 | .641     | 1.90e-05 | 4.36e-03 |
| Human_Motor_Thalamus_L_STN.nii.gz              | -1.26    | -3.33e-04 | -8.51e-04 | 1.84e-04 | .380     | 7.46e-05 | 8.64e-03 |
| Human_Motor_Thalamus_L_VAn.nii.gz              | -0.42    | -8.52e-05 | -4.81e-04 | 3.11e-04 | .741     | 8.33e-06 | 2.89e-03 |
| Human_Motor_Thalamus_L_VAp.nii.gz              | 0.29     | 4.36e-05  | -2.51e-04 | 3.38e-04 | .930     | 3.94e-06 | 1.99e-03 |
| Human_Motor_Thalamus_L_VLdVLv.nii.gz           | 1.23     | 1.54e-04  | -9.13e-05 | 3.99e-04 | .344     | 7.09e-05 | 8.42e-03 |
| Human_Motor_Thalamus_L_VPi.nii.gz              | -0.74    | -1.35e-04 | -4.92e-04 | 2.22e-04 | .561     | 2.57e-05 | 5.07e-03 |
| Human_Motor_Thalamus_L_VPIVpm.nii.gz           | 1.07     | 1.50e-04  | -1.24e-04 | 4.23e-04 | .390     | 5.40e-05 | 7.35e-03 |
| Human_Motor_Thalamus_R_A.nii.gz                | 1.32     | 4.88e-04  | -2.39e-04 | 1.22e-03 | .207     | 8.12e-05 | 9.01e-03 |
| Human_Motor_Thalamus_R_acbcbcs.nii.gz          | -1.02    | -1.73e-04 | -5.05e-04 | 1.58e-04 | .420     | 4.92e-05 | 7.02e-03 |
| Human_Motor_Thalamus_R_alfrfxmtpc.nii.gz       | 1.31     | 4.08e-04  | -2.02e-04 | 1.02e-03 | .209     | 8.05e-05 | 8.97e-03 |
| Human_Motor_Thalamus_R_BasalForebrain.nii.gz   | 0.10     | 2.13e-05  | -3.77e-04 | 4.20e-04 | 1.00     | 5.15e-07 | 7.18e-04 |
| Human_Motor_Thalamus_R_CdPutVSt.nii.gz         | 1.01     | 1.70e-04  | -1.60e-04 | 5.00e-04 | .345     | 4.77e-05 | 6.90e-03 |
| Human_Motor_Thalamus_R_CMPf.nii.gz             | 1.16     | 1.78e-04  | -1.22e-04 | 4.77e-04 | .336     | 6.35e-05 | 7.97e-03 |
| Human_Motor_Thalamus_R_Connectivetissue.nii.gz | 1.12     | 4.49e-04  | -3.36e-04 | 1.23e-03 | .361     | 5.89e-05 | 7.67e-03 |
| Human_Motor_Thalamus_R_eml.nii.gz              | -0.40    | -1.04e-04 | -6.11e-04 | 4.04e-04 | .758     | 7.51e-06 | 2.74e-03 |
| Human_Motor_Thalamus_R_GPl.nii.gz              | 0.22     | 3.77e-05  | -2.99e-04 | 3.74e-04 | .909     | 2.26e-06 | 1.50e-03 |

Table S14

*ET\_PRS Lead\_DBS Extended Associations with grey matter diffusion magnetic resonance imaging (dMRI) – Mean Diffusivity (MD)*

| Tract                                      | <i>t</i>    | $\beta$         | CI_low          | CI_up           | <i>p</i>    | Eta2            | Cohens_f        |
|--------------------------------------------|-------------|-----------------|-----------------|-----------------|-------------|-----------------|-----------------|
| Human_Motor_Thalamus_R_GPm.nii.gz          | -0.22       | -4.23e-05       | -4.25e-04       | 3.41e-04        | .912        | 2.19e-06        | 1.48e-03        |
| Human_Motor_Thalamus_R_Hbl.nii.gz          | 1.53        | 7.67e-04        | -2.13e-04       | 1.75e-03        | .153        | 1.10e-04        | 1.05e-02        |
| Human_Motor_Thalamus_R_Hypothalamus.nii.gz | 0.24        | 5.51e-05        | -4.00e-04       | 5.10e-04        | .993        | 2.64e-06        | 1.63e-03        |
| Human_Motor_Thalamus_R_ic.nii.gz           | 1.29        | 1.97e-04        | -1.03e-04       | 4.96e-04        | .271        | 7.79e-05        | 8.83e-03        |
| <b>Human_Motor_Thalamus_R_LD.nii.gz</b>    | <b>2.46</b> | <b>1.26e-03</b> | <b>2.54e-04</b> | <b>2.26e-03</b> | <b>.019</b> | <b>2.83e-04</b> | <b>1.68e-02</b> |
| Human_Motor_Thalamus_R_LG.nii.gz           | 1.54        | 3.19e-04        | -8.60e-05       | 7.24e-04        | .193        | 1.12e-04        | 1.06e-02        |
| Human_Motor_Thalamus_R_Li.nii.gz           | 1.33        | 2.20e-04        | -1.04e-04       | 5.45e-04        | .223        | 8.32e-05        | 9.12e-03        |
| Human_Motor_Thalamus_R_M.nii.gz            | -0.71       | -1.56e-04       | -5.88e-04       | 2.75e-04        | .524        | 2.37e-05        | 4.87e-03        |
| Human_Motor_Thalamus_R_MB.nii.gz           | 1.06        | 4.60e-04        | -3.93e-04       | 1.31e-03        | .457        | 5.23e-05        | 7.23e-03        |
| Human_Motor_Thalamus_R_MD.nii.gz           | 1.32        | 2.84e-04        | -1.36e-04       | 7.04e-04        | .204        | 8.21e-05        | 9.06e-03        |
| Human_Motor_Thalamus_R_MDCL.nii.gz         | 1.96        | 3.00e-04        | -8.39e-08       | 6.01e-04        | .055        | 1.80e-04        | 1.34e-02        |
| Human_Motor_Thalamus_R_MG.nii.gz           | -0.05       | -1.37e-05       | -5.26e-04       | 4.98e-04        | 1.00        | 1.29e-07        | 3.60e-04        |
| Human_Motor_Thalamus_R_MGC.nii.gz          | 0.86        | 1.66e-04        | -2.10e-04       | 5.42e-04        | .533        | 3.50e-05        | 5.91e-03        |
| Human_Motor_Thalamus_R_MI.nii.gz           | -0.84       | -4.03e-04       | -1.34e-03       | 5.39e-04        | .442        | 3.30e-05        | 5.74e-03        |
| Human_Motor_Thalamus_R_Midbrain.nii.gz     | 0.31        | 4.39e-05        | -2.32e-04       | 3.20e-04        | .831        | 4.56e-06        | 2.13e-03        |
| Human_Motor_Thalamus_R_ot.nii.gz           | 1.25        | 3.50e-04        | -1.99e-04       | 8.98e-04        | .291        | 7.31e-05        | 8.55e-03        |
| Human_Motor_Thalamus_R_PC.nii.gz           | 1.39        | 3.43e-04        | -1.39e-04       | 8.25e-04        | .179        | 9.12e-05        | 9.55e-03        |
| Human_Motor_Thalamus_R_Po.nii.gz           | 1.01        | 1.70e-04        | -1.60e-04       | 5.00e-04        | .344        | 4.77e-05        | 6.91e-03        |
| Human_Motor_Thalamus_R_PPN.nii.gz          | -1.18       | -2.25e-04       | -5.97e-04       | 1.47e-04        | .344        | 6.57e-05        | 8.10e-03        |
| Human_Motor_Thalamus_R_Pul.nii.gz          | 1.10        | 1.82e-04        | -1.43e-04       | 5.07e-04        | .374        | 5.66e-05        | 7.53e-03        |
| Human_Motor_Thalamus_R_R.nii.gz            | -1.11       | -2.40e-04       | -6.65e-04       | 1.85e-04        | .422        | 5.74e-05        | 7.58e-03        |
| Human_Motor_Thalamus_R_Rt.nii.gz           | -0.07       | -8.48e-06       | -2.49e-04       | 2.32e-04        | 1.00        | 2.24e-07        | 4.73e-04        |
| Human_Motor_Thalamus_R_SN.nii.gz           | -1.30       | -2.60e-04       | -6.53e-04       | 1.33e-04        | .279        | 7.89e-05        | 8.88e-03        |

Table S14

*ET\_PRS Lead\_DBS Extended Associations with grey matter diffusion magnetic resonance imaging (dMRI) – Mean Diffusivity (MD)*

| Tract                                | $t$   | $\beta$   | CI_low    | CI_up    | $p$  | Eta2     | Cohens_f |
|--------------------------------------|-------|-----------|-----------|----------|------|----------|----------|
| Human_Motor_Thalamus_R_STN.nii.gz    | -0.92 | -2.50e-04 | -7.81e-04 | 2.80e-04 | .434 | 4.01e-05 | 6.33e-03 |
| Human_Motor_Thalamus_R_VAn.nii.gz    | -0.31 | -6.03e-05 | -4.47e-04 | 3.26e-04 | .836 | 4.38e-06 | 2.09e-03 |
| Human_Motor_Thalamus_R_VAp.nii.gz    | 0.25  | 3.82e-05  | -2.66e-04 | 3.43e-04 | .886 | 2.83e-06 | 1.68e-03 |
| Human_Motor_Thalamus_R_VLdVLv.nii.gz | 1.05  | 1.36e-04  | -1.18e-04 | 3.91e-04 | .360 | 5.16e-05 | 7.18e-03 |
| Human_Motor_Thalamus_R_VPi.nii.gz    | -1.28 | -2.30e-04 | -5.82e-04 | 1.22e-04 | .368 | 7.68e-05 | 8.76e-03 |
| Human_Motor_Thalamus_R_VPIVPm.nii.gz | 0.06  | 8.20e-06  | -2.57e-04 | 2.73e-04 | 1.00 | 1.72e-07 | 4.15e-04 |
| HybraPD_Atlas_L_Ca.nii.gz            | 0.77  | 1.82e-04  | -2.79e-04 | 6.43e-04 | .483 | 2.81e-05 | 5.30e-03 |
| HybraPD_Atlas_L_DN.nii.gz            | -0.54 | -9.05e-05 | -4.19e-04 | 2.38e-04 | .649 | 1.36e-05 | 3.69e-03 |
| HybraPD_Atlas_L_GPe.nii.gz           | 0.24  | 5.18e-05  | -3.63e-04 | 4.67e-04 | .976 | 2.81e-06 | 1.68e-03 |
| HybraPD_Atlas_L_GPi.nii.gz           | -0.50 | -1.06e-04 | -5.20e-04 | 3.07e-04 | .676 | 1.19e-05 | 3.45e-03 |
| HybraPD_Atlas_L_NAC.nii.gz           | -0.96 | -2.16e-04 | -6.55e-04 | 2.23e-04 | .461 | 4.35e-05 | 6.60e-03 |
| HybraPD_Atlas_L_Pu.nii.gz            | 0.82  | 1.16e-04  | -1.63e-04 | 3.94e-04 | .497 | 3.11e-05 | 5.58e-03 |
| HybraPD_Atlas_L_RN.nii.gz            | -1.78 | -3.92e-04 | -8.23e-04 | 4.03e-05 | .138 | 1.48e-04 | 1.22e-02 |
| HybraPD_Atlas_L_TH.MN.nii.gz         | 1.53  | 2.32e-04  | -6.60e-05 | 5.31e-04 | .175 | 1.09e-04 | 1.04e-02 |
| HybraPD_Atlas_L_TH.P.nii.gz          | -0.37 | -6.27e-05 | -3.98e-04 | 2.73e-04 | .873 | 6.29e-06 | 2.51e-03 |
| HybraPD_Atlas_L_TH.VN.nii.gz         | 1.27  | 1.48e-04  | -7.96e-05 | 3.76e-04 | .247 | 7.62e-05 | 8.73e-03 |
| HybraPD_Atlas_R_Ca.nii.gz            | 0.34  | 9.40e-05  | -4.48e-04 | 6.36e-04 | .807 | 5.42e-06 | 2.33e-03 |
| HybraPD_Atlas_R_DN.nii.gz            | -0.26 | -4.35e-05 | -3.76e-04 | 2.89e-04 | .877 | 3.09e-06 | 1.76e-03 |
| HybraPD_Atlas_R_GPe.nii.gz           | 0.75  | 1.50e-04  | -2.43e-04 | 5.43e-04 | .695 | 2.63e-05 | 5.13e-03 |
| HybraPD_Atlas_R_GPi.nii.gz           | -0.13 | -2.66e-05 | -4.32e-04 | 3.78e-04 | .987 | 7.79e-07 | 8.83e-04 |
| HybraPD_Atlas_R_NAC.nii.gz           | -0.71 | -1.57e-04 | -5.87e-04 | 2.74e-04 | .581 | 2.38e-05 | 4.88e-03 |
| HybraPD_Atlas_R_Pu.nii.gz            | 0.42  | 5.96e-05  | -2.17e-04 | 3.36e-04 | .740 | 8.37e-06 | 2.89e-03 |
| HybraPD_Atlas_R_RN.nii.gz            | -0.93 | -2.16e-04 | -6.72e-04 | 2.40e-04 | .554 | 4.05e-05 | 6.36e-03 |

Table S14

*ET\_PRS Lead\_DBS Extended Associations with grey matter diffusion magnetic resonance imaging (dMRI) – Mean Diffusivity (MD)*

| Tract                                               | <i>t</i>    | $\beta$         | CI_low          | CI_up           | <i>p</i>    | Eta2            | Cohens_f        |
|-----------------------------------------------------|-------------|-----------------|-----------------|-----------------|-------------|-----------------|-----------------|
| HybraPD_Atlas_R_TH.MN.nii.gz                        | 1.22        | 1.97e-04        | -1.20e-04       | 5.15e-04        | .307        | 6.96e-05        | 8.34e-03        |
| HybraPD_Atlas_R_TH.P.nii.gz                         | -0.20       | -3.76e-05       | -4.09e-04       | 3.33e-04        | .927        | 1.85e-06        | 1.36e-03        |
| HybraPD_Atlas_R_TH.VN.nii.gz                        | 0.68        | 8.27e-05        | -1.56e-04       | 3.21e-04        | .546        | 2.16e-05        | 4.65e-03        |
| Melbourne_Subcortex_Atlas_LH_aCAU.nii.gz            | 1.33        | 4.03e-04        | -1.93e-04       | 9.98e-04        | .226        | 8.24e-05        | 9.08e-03        |
| Melbourne_Subcortex_Atlas_LH_aGP.nii.gz             | -0.37       | -7.83e-05       | -4.96e-04       | 3.40e-04        | .785        | 6.32e-06        | 2.51e-03        |
| Melbourne_Subcortex_Atlas_LH_aHIP.nii.gz            | -0.03       | -4.97e-06       | -3.45e-04       | 3.35e-04        | 1.00        | 3.85e-08        | 1.96e-04        |
| Melbourne_Subcortex_Atlas_LH_AMY.nii.gz             | -0.44       | -7.11e-05       | -3.85e-04       | 2.42e-04        | .722        | 9.26e-06        | 3.04e-03        |
| Melbourne_Subcortex_Atlas_LH_aPUT.nii.gz            | 0.46        | 6.37e-05        | -2.10e-04       | 3.38e-04        | .792        | 9.76e-06        | 3.12e-03        |
| Melbourne_Subcortex_Atlas_LH_aTHA.nii.gz            | 2.08        | 4.37e-04        | 2.56e-05        | 8.48e-04        | .051        | 2.03e-04        | 1.43e-02        |
| Melbourne_Subcortex_Atlas_LH_CAU-body.nii.gz        | 1.57        | 5.06e-04        | -1.28e-04       | 1.14e-03        | .144        | 1.15e-04        | 1.07e-02        |
| Melbourne_Subcortex_Atlas_LH_CAU-DA.nii.gz          | 1.44        | 5.02e-04        | -1.84e-04       | 1.19e-03        | .166        | 9.66e-05        | 9.83e-03        |
| Melbourne_Subcortex_Atlas_LH_CAU-tail.nii.gz        | 1.92        | 6.32e-04        | -1.20e-05       | 1.28e-03        | .060        | 1.73e-04        | 1.32e-02        |
| Melbourne_Subcortex_Atlas_LH_CAU-VA.nii.gz          | 1.02        | 2.94e-04        | -2.68e-04       | 8.57e-04        | .336        | 4.92e-05        | 7.02e-03        |
| Melbourne_Subcortex_Atlas_LH_CAU.nii.gz             | 1.49        | 4.52e-04        | -1.42e-04       | 1.05e-03        | .166        | 1.04e-04        | 1.02e-02        |
| Melbourne_Subcortex_Atlas_LH_GP.nii.gz              | -0.31       | -5.37e-05       | -3.90e-04       | 2.82e-04        | .830        | 4.59e-06        | 2.14e-03        |
| Melbourne_Subcortex_Atlas_LH_HIP-body.nii.gz        | 1.38        | 2.80e-04        | -1.17e-04       | 6.77e-04        | .230        | 8.94e-05        | 9.46e-03        |
| Melbourne_Subcortex_Atlas_LH_HIP-head-l.nii.gz      | 0.18        | 3.21e-05        | -3.12e-04       | 3.76e-04        | .940        | 1.57e-06        | 1.25e-03        |
| Melbourne_Subcortex_Atlas_LH_HIP-head-m.nii.gz      | -0.33       | -7.11e-05       | -4.94e-04       | 3.51e-04        | .816        | 5.10e-06        | 2.26e-03        |
| Melbourne_Subcortex_Atlas_LH_HIP-head-<br>m1.nii.gz | -0.34       | -6.79e-05       | -4.58e-04       | 3.22e-04        | .896        | 5.45e-06        | 2.34e-03        |
| Melbourne_Subcortex_Atlas_LH_HIP-head-<br>m2.nii.gz | -0.28       | -7.32e-05       | -5.82e-04       | 4.36e-04        | .856        | 3.72e-06        | 1.93e-03        |
| <b>Melbourne_Subcortex_Atlas_LH_HIP-tail.nii.gz</b> | <b>2.61</b> | <b>6.12e-04</b> | <b>1.53e-04</b> | <b>1.07e-03</b> | <b>.012</b> | <b>3.20e-04</b> | <b>1.79e-02</b> |

Table S14

*ET\_PRS Lead\_DBS Extended Associations with grey matter diffusion magnetic resonance imaging (dMRI) – Mean Diffusivity (MD)*

| Tract                                              | <i>t</i>    | $\beta$         | CI_low          | CI_up           | <i>p</i>    | Eta2            | Cohens_f        |
|----------------------------------------------------|-------------|-----------------|-----------------|-----------------|-------------|-----------------|-----------------|
| Melbourne_Subcortex_Atlas_LH_HIP.nii.gz            | 0.99        | 1.70e-04        | -1.68e-04       | 5.07e-04        | .397        | 4.55e-05        | 6.74e-03        |
| Melbourne_Subcortex_Atlas_LH_lAMY.nii.gz           | -0.90       | -1.23e-04       | -3.88e-04       | 1.43e-04        | .402        | 3.83e-05        | 6.19e-03        |
| Melbourne_Subcortex_Atlas_LH_mAMY.nii.gz           | -0.04       | -7.52e-06       | -4.07e-04       | 3.92e-04        | 1.00        | 6.38e-08        | 2.53e-04        |
| Melbourne_Subcortex_Atlas_LH_NAc-core.nii.gz       | 0.79        | 1.94e-04        | -2.85e-04       | 6.73e-04        | .469        | 2.96e-05        | 5.44e-03        |
| Melbourne_Subcortex_Atlas_LH_NAc-shell.nii.gz      | -0.26       | -4.80e-05       | -4.06e-04       | 3.10e-04        | .872        | 3.24e-06        | 1.80e-03        |
| Melbourne_Subcortex_Atlas_LH_NAc.nii.gz            | 0.32        | 6.00e-05        | -3.08e-04       | 4.28e-04        | .824        | 4.80e-06        | 2.19e-03        |
| Melbourne_Subcortex_Atlas_LH_pCAU.nii.gz           | 1.69        | 5.43e-04        | -8.82e-05       | 1.17e-03        | .112        | 1.33e-04        | 1.15e-02        |
| Melbourne_Subcortex_Atlas_LH_pGP.nii.gz            | -0.18       | -2.56e-05       | -3.05e-04       | 2.53e-04        | 1.00        | 1.51e-06        | 1.23e-03        |
| Melbourne_Subcortex_Atlas_LH_pHIP.nii.gz           | 1.91        | 3.91e-04        | -9.27e-06       | 7.90e-04        | .068        | 1.72e-04        | 1.31e-02        |
| Melbourne_Subcortex_Atlas_LH_pPUT.nii.gz           | 0.14        | 1.77e-05        | -2.38e-04       | 2.74e-04        | .981        | 8.60e-07        | 9.27e-04        |
| Melbourne_Subcortex_Atlas_LH_pTHA.nii.gz           | 1.38        | 2.17e-04        | -9.02e-05       | 5.24e-04        | .203        | 8.98e-05        | 9.48e-03        |
| Melbourne_Subcortex_Atlas_LH_PUT-DA.nii.gz         | 0.45        | 6.40e-05        | -2.15e-04       | 3.43e-04        | .718        | 9.49e-06        | 3.08e-03        |
| Melbourne_Subcortex_Atlas_LH_PUT-DP.nii.gz         | 0.73        | 9.83e-05        | -1.66e-04       | 3.63e-04        | .570        | 2.49e-05        | 4.99e-03        |
| Melbourne_Subcortex_Atlas_LH_PUT-VA.nii.gz         | 0.43        | 6.30e-05        | -2.24e-04       | 3.50e-04        | .818        | 8.69e-06        | 2.95e-03        |
| Melbourne_Subcortex_Atlas_LH_PUT-VP.nii.gz         | -0.46       | -6.32e-05       | -3.31e-04       | 2.04e-04        | .708        | 1.01e-05        | 3.17e-03        |
| Melbourne_Subcortex_Atlas_LH_PUT.nii.gz            | 0.31        | 3.94e-05        | -2.13e-04       | 2.92e-04        | .836        | 4.38e-06        | 2.09e-03        |
| <b>Melbourne_Subcortex_Atlas_LH_THA-DA.nii.gz</b>  | <b>2.83</b> | <b>6.81e-04</b> | <b>2.09e-04</b> | <b>1.15e-03</b> | <b>.006</b> | <b>3.75e-04</b> | <b>1.94e-02</b> |
| <b>Melbourne_Subcortex_Atlas_LH_THA-DAI.nii.gz</b> | <b>2.34</b> | <b>3.38e-04</b> | <b>5.48e-05</b> | <b>6.21e-04</b> | <b>.024</b> | <b>2.57e-04</b> | <b>1.60e-02</b> |
| <b>Melbourne_Subcortex_Atlas_LH_THA-DAm.nii.gz</b> | <b>2.77</b> | <b>9.63e-04</b> | <b>2.82e-04</b> | <b>1.64e-03</b> | <b>.008</b> | <b>3.60e-04</b> | <b>1.90e-02</b> |
| Melbourne_Subcortex_Atlas_LH_THA-DP.nii.gz         | 0.88        | 1.73e-04        | -2.14e-04       | 5.59e-04        | .419        | 3.60e-05        | 6.00e-03        |
| Melbourne_Subcortex_Atlas_LH_THA-VA.nii.gz         | 1.37        | 2.99e-04        | -1.30e-04       | 7.27e-04        | .236        | 8.76e-05        | 9.36e-03        |
| Melbourne_Subcortex_Atlas_LH_THA-VAi.nii.gz        | 0.71        | 1.66e-04        | -2.93e-04       | 6.25e-04        | .527        | 2.35e-05        | 4.84e-03        |

**Table S14**

***ET\_PRS Lead\_DBS Extended Associations with grey matter diffusion magnetic resonance imaging (dMRI) – Mean Diffusivity (MD)***

| Tract                                              | <i>t</i>    | $\beta$         | CI_low          | CI_up           | <i>p</i>    | Eta2            | Cohens_f        |
|----------------------------------------------------|-------------|-----------------|-----------------|-----------------|-------------|-----------------|-----------------|
| Melbourne_Subcortex_Atlas_LH_THA-VAia.nii.gz       | 0.12        | 3.40e-05        | -5.18e-04       | 5.86e-04        | .994        | 6.84e-07        | 8.27e-04        |
| Melbourne_Subcortex_Atlas_LH_THA-VAip.nii.gz       | 1.20        | 2.48e-04        | -1.58e-04       | 6.54e-04        | .282        | 6.74e-05        | 8.21e-03        |
| <b>Melbourne_Subcortex_Atlas_LH_THA-VAs.nii.gz</b> | <b>2.25</b> | <b>5.07e-04</b> | <b>6.55e-05</b> | <b>9.48e-04</b> | <b>.034</b> | <b>2.38e-04</b> | <b>1.54e-02</b> |
| Melbourne_Subcortex_Atlas_LH_THA-VP.nii.gz         | 1.95        | 2.66e-04        | -7.76e-07       | 5.33e-04        | .080        | 1.79e-04        | 1.34e-02        |
| Melbourne_Subcortex_Atlas_LH_THA-VPl.nii.gz        | 1.56        | 2.01e-04        | -5.10e-05       | 4.53e-04        | .185        | 1.15e-04        | 1.07e-02        |
| Melbourne_Subcortex_Atlas_LH_THA-VPm.nii.gz        | 1.97        | 3.19e-04        | 2.00e-06        | 6.35e-04        | .076        | 1.82e-04        | 1.35e-02        |
| Melbourne_Subcortex_Atlas_RH_aCAU.nii.gz           | 0.44        | 1.03e-04        | -3.55e-04       | 5.61e-04        | .727        | 9.04e-06        | 3.01e-03        |
| Melbourne_Subcortex_Atlas_RH_aGP.nii.gz            | -0.03       | -5.28e-06       | -4.11e-04       | 4.01e-04        | 1.00        | 3.04e-08        | 1.74e-04        |
| Melbourne_Subcortex_Atlas_RH_aHIP.nii.gz           | -0.01       | -1.75e-06       | -3.30e-04       | 3.27e-04        | 1.00        | 5.09e-09        | 7.13e-05        |
| Melbourne_Subcortex_Atlas_RH_AMY.nii.gz            | -0.43       | -6.42e-05       | -3.55e-04       | 2.27e-04        | .813        | 8.76e-06        | 2.96e-03        |
| Melbourne_Subcortex_Atlas_RH_aPUT.nii.gz           | 0.17        | 2.31e-05        | -2.46e-04       | 2.92e-04        | .953        | 1.33e-06        | 1.15e-03        |
| Melbourne_Subcortex_Atlas_RH_aTHA.nii.gz           | 1.72        | 3.13e-04        | -4.43e-05       | 6.69e-04        | .095        | 1.38e-04        | 1.18e-02        |
| Melbourne_Subcortex_Atlas_RH_CAU-body.nii.gz       | 0.81        | 1.83e-04        | -2.60e-04       | 6.25e-04        | .460        | 3.07e-05        | 5.54e-03        |
| Melbourne_Subcortex_Atlas_RH_CAU-DA.nii.gz         | 0.41        | 1.17e-04        | -4.37e-04       | 6.72e-04        | .746        | 8.07e-06        | 2.84e-03        |
| Melbourne_Subcortex_Atlas_RH_CAU-tail.nii.gz       | 0.97        | 1.93e-04        | -1.97e-04       | 5.83e-04        | .365        | 4.41e-05        | 6.64e-03        |
| Melbourne_Subcortex_Atlas_RH_CAU-VA.nii.gz         | 0.41        | 8.05e-05        | -3.01e-04       | 4.62e-04        | .747        | 8.01e-06        | 2.83e-03        |
| Melbourne_Subcortex_Atlas_RH_CAU.nii.gz            | 0.59        | 1.31e-04        | -3.03e-04       | 5.64e-04        | .610        | 1.63e-05        | 4.04e-03        |
| Melbourne_Subcortex_Atlas_RH_GP.nii.gz             | 0.10        | 1.58e-05        | -3.09e-04       | 3.40e-04        | 1.00        | 4.26e-07        | 6.53e-04        |
| Melbourne_Subcortex_Atlas_RH_HIP-body.nii.gz       | 1.17        | 2.41e-04        | -1.63e-04       | 6.45e-04        | .297        | 6.40e-05        | 8.00e-03        |
| Melbourne_Subcortex_Atlas_RH_HIP-head-l.nii.gz     | -0.09       | -1.62e-05       | -3.63e-04       | 3.31e-04        | 1.00        | 3.94e-07        | 6.28e-04        |
| Melbourne_Subcortex_Atlas_RH_HIP-head-m.nii.gz     | -0.09       | -1.71e-05       | -4.04e-04       | 3.69e-04        | 1.00        | 3.52e-07        | 5.94e-04        |
| Melbourne_Subcortex_Atlas_RH_HIP-head-ml.nii.gz    | -0.81       | -1.49e-04       | -5.09e-04       | 2.10e-04        | .458        | 3.10e-05        | 5.57e-03        |



**Table S14**

***ET\_PRS Lead\_DBS Extended Associations with grey matter diffusion magnetic resonance imaging (dMRI) – Mean Diffusivity (MD)***

| Tract                                              | <i>t</i>    | $\beta$         | CI_low          | CI_up           | <i>p</i>    | Eta2            | Cohens_f        |
|----------------------------------------------------|-------------|-----------------|-----------------|-----------------|-------------|-----------------|-----------------|
| Melbourne_Subcortex_Atlas_RH_HIP-head-m2.nii.gz    | 0.82        | 2.12e-04        | -2.94e-04       | 7.18e-04        | .453        | 3.16e-05        | 5.62e-03        |
| Melbourne_Subcortex_Atlas_RH_HIP-tail.nii.gz       | 1.40        | 3.17e-04        | -1.26e-04       | 7.60e-04        | .178        | 9.19e-05        | 9.59e-03        |
| Melbourne_Subcortex_Atlas_RH_HIP.nii.gz            | 0.72        | 1.20e-04        | -2.06e-04       | 4.46e-04        | .573        | 2.46e-05        | 4.96e-03        |
| Melbourne_Subcortex_Atlas_RH_lAMY.nii.gz           | -1.05       | -1.40e-04       | -4.00e-04       | 1.21e-04        | .404        | 5.17e-05        | 7.19e-03        |
| Melbourne_Subcortex_Atlas_RH_mAMY.nii.gz           | 0.12        | 2.15e-05        | -3.29e-04       | 3.72e-04        | .995        | 6.74e-07        | 8.21e-04        |
| Melbourne_Subcortex_Atlas_RH_NAc-core.nii.gz       | -0.24       | -4.57e-05       | -4.24e-04       | 3.33e-04        | .894        | 2.62e-06        | 1.62e-03        |
| Melbourne_Subcortex_Atlas_RH_NAc-shell.nii.gz      | -0.67       | -1.19e-04       | -4.67e-04       | 2.29e-04        | .553        | 2.11e-05        | 4.59e-03        |
| Melbourne_Subcortex_Atlas_RH_NAc.nii.gz            | -0.52       | -8.58e-05       | -4.10e-04       | 2.38e-04        | .664        | 1.26e-05        | 3.55e-03        |
| Melbourne_Subcortex_Atlas_RH_pCAU.nii.gz           | 0.86        | 1.85e-04        | -2.37e-04       | 6.06e-04        | .429        | 3.46e-05        | 5.88e-03        |
| Melbourne_Subcortex_Atlas_RH_pGP.nii.gz            | 0.27        | 3.74e-05        | -2.30e-04       | 3.05e-04        | .863        | 3.51e-06        | 1.87e-03        |
| Melbourne_Subcortex_Atlas_RH_pHIP.nii.gz           | 1.32        | 2.65e-04        | -1.27e-04       | 6.58e-04        | .204        | 8.22e-05        | 9.07e-03        |
| Melbourne_Subcortex_Atlas_RH_pPUT.nii.gz           | 0.69        | 8.92e-05        | -1.63e-04       | 3.41e-04        | .606        | 2.26e-05        | 4.75e-03        |
| Melbourne_Subcortex_Atlas_RH_pTHA.nii.gz           | 1.52        | 2.47e-04        | -7.11e-05       | 5.65e-04        | .157        | 1.09e-04        | 1.04e-02        |
| Melbourne_Subcortex_Atlas_RH_PUT-DA.nii.gz         | 0.60        | 8.24e-05        | -1.87e-04       | 3.51e-04        | .603        | 1.69e-05        | 4.11e-03        |
| Melbourne_Subcortex_Atlas_RH_PUT-DP.nii.gz         | 1.04        | 1.39e-04        | -1.23e-04       | 4.02e-04        | .329        | 5.06e-05        | 7.11e-03        |
| Melbourne_Subcortex_Atlas_RH_PUT-VA.nii.gz         | -0.25       | -3.71e-05       | -3.25e-04       | 2.50e-04        | .880        | 3.00e-06        | 1.73e-03        |
| Melbourne_Subcortex_Atlas_RH_PUT-VP.nii.gz         | 0.29        | 3.73e-05        | -2.17e-04       | 2.92e-04        | .908        | 3.86e-06        | 1.96e-03        |
| Melbourne_Subcortex_Atlas_RH_PUT.nii.gz            | 0.45        | 5.71e-05        | -1.92e-04       | 3.06e-04        | .718        | 9.49e-06        | 3.08e-03        |
| <b>Melbourne_Subcortex_Atlas_RH_THA-DA.nii.gz</b>  | <b>2.67</b> | <b>6.00e-04</b> | <b>1.59e-04</b> | <b>1.04e-03</b> | <b>.011</b> | <b>3.33e-04</b> | <b>1.83e-02</b> |
| Melbourne_Subcortex_Atlas_RH_THA-DAl.nii.gz        | 1.99        | 2.79e-04        | 4.15e-06        | 5.54e-04        | .065        | 1.86e-04        | 1.36e-02        |
| <b>Melbourne_Subcortex_Atlas_RH_THA-DAm.nii.gz</b> | <b>2.67</b> | <b>8.27e-04</b> | <b>2.19e-04</b> | <b>1.44e-03</b> | <b>.011</b> | <b>3.33e-04</b> | <b>1.83e-02</b> |

**Table S14**

***ET\_PRS Lead\_DBS Extended Associations with grey matter diffusion magnetic resonance imaging (dMRI) – Mean Diffusivity (MD)***

| Tract                                                   | <i>t</i> | $\beta$   | CI_low    | CI_up    | <i>p</i> | Eta2     | Cohens_f |
|---------------------------------------------------------|----------|-----------|-----------|----------|----------|----------|----------|
| Melbourne_Subcortex_Atlas_RH_THA-DP.nii.gz              | 1.71     | 3.59e-04  | -5.35e-05 | 7.71e-04 | .138     | 1.36e-04 | 1.17e-02 |
| Melbourne_Subcortex_Atlas_RH_THA-VA.nii.gz              | 0.82     | 1.49e-04  | -2.05e-04 | 5.02e-04 | .452     | 3.17e-05 | 5.63e-03 |
| Melbourne_Subcortex_Atlas_RH_THA-VAi.nii.gz             | 0.24     | 4.57e-05  | -3.32e-04 | 4.23e-04 | .894     | 2.64e-06 | 1.62e-03 |
| Melbourne_Subcortex_Atlas_RH_THA-VAia.nii.gz            | -0.64    | -1.44e-04 | -5.86e-04 | 2.99e-04 | .577     | 1.90e-05 | 4.36e-03 |
| Melbourne_Subcortex_Atlas_RH_THA-VAip.nii.gz            | 0.97     | 1.77e-04  | -1.82e-04 | 5.36e-04 | .367     | 4.38e-05 | 6.62e-03 |
| Melbourne_Subcortex_Atlas_RH_THA-VAs.nii.gz             | 1.64     | 3.16e-04  | -6.10e-05 | 6.93e-04 | .110     | 1.27e-04 | 1.12e-02 |
| Melbourne_Subcortex_Atlas_RH_THA-VP.nii.gz              | 1.04     | 1.40e-04  | -1.23e-04 | 4.04e-04 | .327     | 5.09e-05 | 7.13e-03 |
| Melbourne_Subcortex_Atlas_RH_THA-VPl.nii.gz             | 0.19     | 2.46e-05  | -2.34e-04 | 2.83e-04 | .999     | 1.63e-06 | 1.28e-03 |
| Melbourne_Subcortex_Atlas_RH_THA-VPm.nii.gz             | 1.64     | 2.55e-04  | -5.03e-05 | 5.61e-04 | .112     | 1.26e-04 | 1.12e-02 |
| MNI_PD25_subcortical_LH_amygdala.nii.gz                 | -1.17    | -1.56e-04 | -4.18e-04 | 1.06e-04 | .267     | 6.41e-05 | 8.00e-03 |
| MNI_PD25_subcortical_LH_caudate.nii.gz                  | 1.26     | 3.03e-04  | -1.68e-04 | 7.74e-04 | .228     | 7.44e-05 | 8.63e-03 |
| MNI_PD25_subcortical_LH_globus_pallidus_externus.nii.gz | -0.15    | -2.36e-05 | -3.33e-04 | 2.86e-04 | .970     | 1.04e-06 | 1.02e-03 |
| MNI_PD25_subcortical_LH_globus_pallidus_internus.nii.gz | -0.39    | -7.25e-05 | -4.33e-04 | 2.88e-04 | .762     | 7.30e-06 | 2.70e-03 |
| MNI_PD25_subcortical_LH_hippocampus.nii.gz              | 1.32     | 2.23e-04  | -1.08e-04 | 5.53e-04 | .228     | 8.18e-05 | 9.04e-03 |
| MNI_PD25_subcortical_LH_nucleus_accumbens.nii.gz        | -0.56    | -1.11e-04 | -5.00e-04 | 2.77e-04 | .632     | 1.48e-05 | 3.84e-03 |
| MNI_PD25_subcortical_LH_putamen.nii.gz                  | 0.40     | 5.16e-05  | -2.00e-04 | 3.03e-04 | .757     | 7.57e-06 | 2.75e-03 |
| MNI_PD25_subcortical_LH_red_nucleus.nii.gz              | -1.74    | -3.53e-04 | -7.50e-04 | 4.43e-05 | .128     | 1.42e-04 | 1.19e-02 |
| MNI_PD25_subcortical_LH_substantia_nigra.nii.gz         | -0.25    | -5.76e-05 | -5.11e-04 | 3.96e-04 | 1.00     | 2.91e-06 | 1.71e-03 |
| MNI_PD25_subcortical_LH_subthalamic_nucleus.nii.gz      | -1.21    | -3.02e-04 | -7.91e-04 | 1.88e-04 | .357     | 6.83e-05 | 8.26e-03 |

**Table S14**

***ET\_PRS Lead\_DBS Extended Associations with grey matter diffusion magnetic resonance imaging (dMRI) – Mean Diffusivity (MD)***

| Tract                                                   | <i>t</i>    | $\beta$         | CI_low          | CI_up           | <i>p</i>    | Eta2            | Cohens_f        |
|---------------------------------------------------------|-------------|-----------------|-----------------|-----------------|-------------|-----------------|-----------------|
| MNI_PD25_subcortical_LH_thalamus.nii.gz                 | 1.80        | 2.61e-04        | -2.39e-05       | 5.45e-04        | .100        | 1.51e-04        | 1.23e-02        |
| MNI_PD25_subcortical_RH_amygdala.nii.gz                 | -1.00       | -1.37e-04       | -4.03e-04       | 1.30e-04        | .347        | 4.73e-05        | 6.88e-03        |
| MNI_PD25_subcortical_RH_caudate.nii.gz                  | 0.77        | 2.18e-04        | -3.38e-04       | 7.74e-04        | .486        | 2.77e-05        | 5.26e-03        |
| MNI_PD25_subcortical_RH_globus_pallidus_externus.nii.gz | 0.33        | 5.26e-05        | -2.59e-04       | 3.64e-04        | .974        | 5.12e-06        | 2.26e-03        |
| MNI_PD25_subcortical_RH_globus_pallidus_Internus.nii.gz | -0.21       | -3.70e-05       | -3.91e-04       | 3.16e-04        | .921        | 1.98e-06        | 1.41e-03        |
| MNI_PD25_subcortical_RH_hippocampus.nii.gz              | 0.83        | 1.36e-04        | -1.84e-04       | 4.55e-04        | .481        | 3.26e-05        | 5.71e-03        |
| MNI_PD25_subcortical_RH_nucleus_accumbens.nii.gz        | -0.92       | -1.79e-04       | -5.63e-04       | 2.04e-04        | .495        | 3.93e-05        | 6.27e-03        |
| MNI_PD25_subcortical_RH_putamen.nii.gz                  | 0.43        | 5.46e-05        | -1.95e-04       | 3.04e-04        | .736        | 8.58e-06        | 2.93e-03        |
| MNI_PD25_subcortical_RH_red_nucleus.nii.gz              | -1.12       | -2.34e-04       | -6.44e-04       | 1.75e-04        | .360        | 5.90e-05        | 7.68e-03        |
| MNI_PD25_subcortical_RH_substantia_nigra.nii.gz         | -1.01       | -2.19e-04       | -6.43e-04       | 2.05e-04        | .427        | 4.82e-05        | 6.94e-03        |
| MNI_PD25_subcortical_RH_subthalamic_nucleus.nii.gz      | -0.97       | -2.52e-04       | -7.62e-04       | 2.58e-04        | .407        | 4.40e-05        | 6.63e-03        |
| MNI_PD25_subcortical_RH_thalamus.nii.gz                 | 1.29        | 1.91e-04        | -9.84e-05       | 4.81e-04        | .215        | 7.86e-05        | 8.86e-03        |
| Thalamic_DBS_Connectivity_atlas_LH_Dentate.nii.gz       | 0.68        | 8.85e-05        | -1.67e-04       | 3.44e-04        | .684        | 2.16e-05        | 4.65e-03        |
| Thalamic_DBS_Connectivity_atlas_RH_Dentate.nii.gz       | 0.34        | 4.30e-05        | -2.04e-04       | 2.90e-04        | .806        | 5.45e-06        | 2.33e-03        |
| Thomas_Atlas_LH_AV.nii.gz                               | 1.71        | 5.70e-04        | -8.24e-05       | 1.22e-03        | .096        | 1.37e-04        | 1.17e-02        |
| Thomas_Atlas_LH_CM.nii.gz                               | 1.51        | 2.12e-04        | -6.37e-05       | 4.89e-04        | .181        | 1.07e-04        | 1.03e-02        |
| <b>Thomas_Atlas_LH_Hb.nii.gz</b>                        | <b>2.39</b> | <b>8.79e-04</b> | <b>1.59e-04</b> | <b>1.60e-03</b> | <b>.026</b> | <b>2.68e-04</b> | <b>1.64e-02</b> |

Table S14

*ET\_PRS Lead\_DBS Extended Associations with grey matter diffusion magnetic resonance imaging (dMRI) – Mean Diffusivity (MD)*

| Tract                               | <i>t</i>    | $\beta$         | CI_low          | CI_up           | <i>p</i>    | Eta2            | Cohens_f        |
|-------------------------------------|-------------|-----------------|-----------------|-----------------|-------------|-----------------|-----------------|
| Thomas_Atlas_LH_LGN.nii.gz          | 0.58        | 9.08e-05        | -2.16e-04       | 3.98e-04        | .687        | 1.57e-05        | 3.97e-03        |
| <b>Thomas_Atlas_LH_MD-Pf.nii.gz</b> | <b>2.36</b> | <b>4.40e-04</b> | <b>7.40e-05</b> | <b>8.05e-04</b> | <b>.029</b> | <b>2.60e-04</b> | <b>1.61e-02</b> |
| Thomas_Atlas_LH_MGN.nii.gz          | -0.04       | -8.93e-06       | -4.21e-04       | 4.03e-04        | 1.00        | 8.47e-08        | 2.91e-04        |
| Thomas_Atlas_LH_MTT.nii.gz          | -0.48       | -1.05e-04       | -5.35e-04       | 3.26e-04        | .698        | 1.06e-05        | 3.26e-03        |
| Thomas_Atlas_LH_Pul.nii.gz          | 1.24        | 2.01e-04        | -1.17e-04       | 5.18e-04        | .237        | 7.19e-05        | 8.48e-03        |
| Thomas_Atlas_LH_THALAMUS.nii.gz     | 1.65        | 2.33e-04        | -4.35e-05       | 5.10e-04        | .125        | 1.28e-04        | 1.13e-02        |
| Thomas_Atlas_LH_VA.nii.gz           | 0.06        | 1.10e-05        | -3.21e-04       | 3.43e-04        | 1.00        | 1.97e-07        | 4.44e-04        |
| Thomas_Atlas_LH_VLa.nii.gz          | 0.16        | 2.58e-05        | -2.95e-04       | 3.47e-04        | 1.00        | 1.16e-06        | 1.08e-03        |
| Thomas_Atlas_LH_VLP.nii.gz          | 1.19        | 1.47e-04        | -9.51e-05       | 3.89e-04        | .368        | 6.64e-05        | 8.15e-03        |
| Thomas_Atlas_LH_VLPd.nii.gz         | 1.07        | 1.38e-04        | -1.15e-04       | 3.92e-04        | .391        | 5.37e-05        | 7.33e-03        |
| Thomas_Atlas_LH_VLPv.nii.gz         | 1.18        | 1.62e-04        | -1.07e-04       | 4.32e-04        | .435        | 6.54e-05        | 8.09e-03        |
| Thomas_Atlas_LH_VPL.nii.gz          | 1.51        | 1.89e-04        | -5.64e-05       | 4.34e-04        | .241        | 1.07e-04        | 1.03e-02        |
| Thomas_Atlas_RH_AV.nii.gz           | 1.06        | 3.49e-04        | -2.98e-04       | 9.96e-04        | .320        | 5.23e-05        | 7.23e-03        |
| Thomas_Atlas_RH_CM.nii.gz           | 1.39        | 2.05e-04        | -8.46e-05       | 4.95e-04        | .293        | 9.03e-05        | 9.50e-03        |
| <b>Thomas_Atlas_RH_Hb.nii.gz</b>    | <b>2.12</b> | <b>7.30e-04</b> | <b>5.50e-05</b> | <b>1.41e-03</b> | <b>.047</b> | <b>2.11e-04</b> | <b>1.45e-02</b> |
| Thomas_Atlas_RH_LGN.nii.gz          | 0.96        | 1.56e-04        | -1.62e-04       | 4.74e-04        | .463        | 4.33e-05        | 6.58e-03        |
| Thomas_Atlas_RH_MD-Pf.nii.gz        | 1.69        | 3.28e-04        | -5.16e-05       | 7.07e-04        | .099        | 1.34e-04        | 1.16e-02        |
| Thomas_Atlas_RH_MGN.nii.gz          | 0.82        | 1.64e-04        | -2.30e-04       | 5.59e-04        | .506        | 3.12e-05        | 5.59e-03        |
| Thomas_Atlas_RH_MTT.nii.gz          | -0.45       | -1.02e-04       | -5.46e-04       | 3.43e-04        | .800        | 9.39e-06        | 3.06e-03        |
| Thomas_Atlas_RH_Pul.nii.gz          | 1.29        | 2.12e-04        | -1.10e-04       | 5.34e-04        | .270        | 7.83e-05        | 8.85e-03        |
| Thomas_Atlas_RH_THALAMUS.nii.gz     | 1.34        | 1.94e-04        | -9.01e-05       | 4.77e-04        | .199        | 8.38e-05        | 9.16e-03        |
| Thomas_Atlas_RH_VA.nii.gz           | -0.15       | -2.65e-05       | -3.62e-04       | 3.09e-04        | .965        | 1.12e-06        | 1.06e-03        |
| Thomas_Atlas_RH_VLa.nii.gz          | 0.25        | 4.43e-05        | -3.06e-04       | 3.94e-04        | .983        | 2.88e-06        | 1.70e-03        |

**Table S14*****ET\_PRS Lead\_DBS Extended Associations with grey matter diffusion magnetic resonance imaging (dMRI) – Mean Diffusivity (MD)***

| Tract                       | <i>t</i> | $\beta$  | CI_low    | CI_up    | <i>p</i> | Eta2     | Cohens_f |
|-----------------------------|----------|----------|-----------|----------|----------|----------|----------|
| Thomas_Atlas_RH_VLP.nii.gz  | 0.88     | 1.13e-04 | -1.39e-04 | 3.64e-04 | .466     | 3.60e-05 | 6.00e-03 |
| Thomas_Atlas_RH_VLPd.nii.gz | 1.01     | 1.35e-04 | -1.28e-04 | 3.98e-04 | .384     | 4.75e-05 | 6.89e-03 |
| Thomas_Atlas_RH_VLPv.nii.gz | 0.55     | 7.94e-05 | -2.02e-04 | 3.61e-04 | .709     | 1.43e-05 | 3.78e-03 |
| Thomas_Atlas_RH_VPL.nii.gz  | 0.65     | 8.33e-05 | -1.67e-04 | 3.33e-04 | .627     | 2.00e-05 | 4.48e-03 |

*Note*\* *p* < .05, \*\* *p* < .01, \*\*\* *p* < .001, 95% CI(B)**Table S15*****ET\_PRS Lead\_DBS Extended Associations with grey matter diffusion magnetic resonance imaging (dMRI) – Fractional Anisotropy (FA)***

| Tract                                                    | <i>t</i>    | $\beta$         | CI_low          | CI_up           | <i>p</i>    | Eta2            | Cohens_f        |
|----------------------------------------------------------|-------------|-----------------|-----------------|-----------------|-------------|-----------------|-----------------|
| AHEAD_Atlas_GPe_L.nii.gz                                 | -0.17       | -1.14e-03       | -1.42e-02       | 1.19e-02        | .950        | 1.37e-06        | 1.17e-03        |
| AHEAD_Atlas_GPe_R_mask.nii.gz                            | 0.22        | 1.43e-03        | -1.15e-02       | 1.43e-02        | .911        | 2.21e-06        | 1.49e-03        |
| AHEAD_Atlas_GPi_L_mask.nii.gz                            | 0.80        | 5.33e-03        | -7.79e-03       | 1.84e-02        | .722        | 2.97e-05        | 5.45e-03        |
| AHEAD_Atlas_GPi_R_mask.nii.gz                            | -0.82       | -5.49e-03       | -1.87e-02       | 7.68e-03        | .650        | 3.13e-05        | 5.59e-03        |
| <b>AHEAD_Atlas_RN_L_mask.nii.gz</b>                      | <b>3.26</b> | <b>2.19e-02</b> | <b>8.70e-03</b> | <b>3.50e-02</b> | <b>.003</b> | <b>4.97e-04</b> | <b>2.23e-02</b> |
| <b>AHEAD_Atlas_RN_R_mask.nii.gz</b>                      | <b>3.32</b> | <b>2.23e-02</b> | <b>9.12e-03</b> | <b>3.54e-02</b> | <b>.002</b> | <b>5.16e-04</b> | <b>2.27e-02</b> |
| AHEAD_Atlas_SN_L_mask.nii.gz                             | -0.48       | -3.23e-03       | -1.65e-02       | 1.01e-02        | .775        | 1.06e-05        | 3.25e-03        |
| AHEAD_Atlas_SN_R_mask.nii.gz                             | 0.07        | 4.94e-04        | -1.27e-02       | 1.37e-02        | 1.00        | 2.53e-07        | 5.03e-04        |
| AHEAD_Atlas_STN_L_mask.nii.gz                            | 0.76        | 5.15e-03        | -8.10e-03       | 1.84e-02        | .614        | 2.72e-05        | 5.21e-03        |
| AHEAD_Atlas_STN_R_mask.nii.gz                            | -0.44       | -2.94e-03       | -1.61e-02       | 1.02e-02        | .808        | 8.99e-06        | 3.00e-03        |
| Atlas_Basal_Ganglia_and_Thalamus_all_histo_labels.nii.gz | 0.29        | 1.89e-03        | -1.10e-02       | 1.48e-02        | .946        | 3.85e-06        | 1.96e-03        |
| Atlas_Basal_Ganglia_and_Thalamus_L_Acc.nii.gz            | 0.16        | 1.04e-03        | -1.14e-02       | 1.35e-02        | .957        | 1.25e-06        | 1.12e-03        |

Table S15

*ET\_PRS Lead\_DBs Extended Associations with grey matter diffusion magnetic resonance imaging (dMRI) – Fractional Anisotropy (FA)*

| Tract                                                        | <i>t</i>     | $\beta$          | CI_low           | CI_up            | <i>p</i>    | Eta2            | Cohens_f        |
|--------------------------------------------------------------|--------------|------------------|------------------|------------------|-------------|-----------------|-----------------|
| <b>Atlas_Basal_Ganglia_and_Thalamus_L_Cau-<br/>ia.nii.gz</b> | <b>-2.24</b> | <b>-1.46e-02</b> | <b>-2.73e-02</b> | <b>-1.82e-03</b> | <b>.046</b> | <b>2.35e-04</b> | <b>1.53e-02</b> |
| Atlas_Basal_Ganglia_and_Thalamus_L_Cau-<br>im.nii.gz         | -1.11        | -7.02e-03        | -1.95e-02        | 5.42e-03         | .369        | 5.73e-05        | 7.57e-03        |
| Atlas_Basal_Ganglia_and_Thalamus_L_Cau-<br>sa.nii.gz         | -1.27        | -8.33e-03        | -2.12e-02        | 4.55e-03         | .282        | 7.53e-05        | 8.68e-03        |
| <b>Atlas_Basal_Ganglia_and_Thalamus_L_Cau-<br/>sp.nii.gz</b> | <b>-2.51</b> | <b>-1.66e-02</b> | <b>-2.96e-02</b> | <b>-3.62e-03</b> | <b>.019</b> | <b>2.94e-04</b> | <b>1.71e-02</b> |
| Atlas_Basal_Ganglia_and_Thalamus_L_GPe.nii.gz                | 0.54         | 3.64e-03         | -9.50e-03        | 1.68e-02         | .808        | 1.38e-05        | 3.71e-03        |
| Atlas_Basal_Ganglia_and_Thalamus_L_GPi.nii.gz                | -0.07        | -4.85e-04        | -1.37e-02        | 1.27e-02         | 1.00        | 2.43e-07        | 4.93e-04        |
| Atlas_Basal_Ganglia_and_Thalamus_L_Put-<br>ia.nii.gz         | -0.02        | -1.53e-04        | -1.26e-02        | 1.22e-02         | 1.00        | 2.74e-08        | 1.65e-04        |
| Atlas_Basal_Ganglia_and_Thalamus_L_Put-<br>im.nii.gz         | 1.05         | 6.67e-03         | -5.84e-03        | 1.92e-02         | .465        | 5.12e-05        | 7.15e-03        |
| Atlas_Basal_Ganglia_and_Thalamus_L_Put-<br>sa.nii.gz         | -0.66        | -4.23e-03        | -1.68e-02        | 8.34e-03         | .561        | 2.03e-05        | 4.51e-03        |
| Atlas_Basal_Ganglia_and_Thalamus_L_Put-<br>sm.nii.gz         | 0.51         | 3.34e-03         | -9.38e-03        | 1.61e-02         | .667        | 1.24e-05        | 3.52e-03        |
| Atlas_Basal_Ganglia_and_Thalamus_L_Put-<br>sp.nii.gz         | -0.12        | -8.14e-04        | -1.39e-02        | 1.23e-02         | .993        | 6.95e-07        | 8.33e-04        |
| Atlas_Basal_Ganglia_and_Thalamus_L_SN.nii.gz                 | -0.25        | -1.70e-03        | -1.49e-02        | 1.15e-02         | .978        | 3.00e-06        | 1.73e-03        |
| Atlas_Basal_Ganglia_and_Thalamus_L_STN.nii.gz                | 2.10         | 1.43e-02         | 9.36e-04         | 2.76e-02         | .145        | 2.06e-04        | 1.44e-02        |

**Table S15**

***ET\_PRS Lead\_DBS Extended Associations with grey matter diffusion magnetic resonance imaging (dMRI) – Fractional Anisotropy (FA)***

| Tract                                                 | <i>t</i> | $\beta$   | CI_low    | CI_up    | <i>p</i> | Eta2     | Cohens_f |
|-------------------------------------------------------|----------|-----------|-----------|----------|----------|----------|----------|
| Atlas_Basal_Ganglia_and_Thalamus_L_Tha-<br>a.nii.gz   | -1.38    | -8.85e-03 | -2.14e-02 | 3.69e-03 | .183     | 8.97e-05 | 9.47e-03 |
| Atlas_Basal_Ganglia_and_Thalamus_L_Tha-<br>ld.nii.gz  | -0.76    | -5.07e-03 | -1.82e-02 | 8.07e-03 | .550     | 2.68e-05 | 5.17e-03 |
| Atlas_Basal_Ganglia_and_Thalamus_L_Tha-<br>lp.nii.gz  | -0.43    | -2.94e-03 | -1.62e-02 | 1.03e-02 | .812     | 8.84e-06 | 2.97e-03 |
| Atlas_Basal_Ganglia_and_Thalamus_L_Tha-<br>lpu.nii.gz | 0.38     | 2.54e-03  | -1.07e-02 | 1.58e-02 | 1.00     | 6.60e-06 | 2.57e-03 |
| Atlas_Basal_Ganglia_and_Thalamus_L_Tha-<br>md.nii.gz  | -0.38    | -2.51e-03 | -1.53e-02 | 1.03e-02 | .857     | 6.92e-06 | 2.63e-03 |
| Atlas_Basal_Ganglia_and_Thalamus_L_Tha-<br>mpu.nii.gz | -1.05    | -6.98e-03 | -2.00e-02 | 6.07e-03 | .360     | 5.15e-05 | 7.18e-03 |
| Atlas_Basal_Ganglia_and_Thalamus_L_Tha-<br>vp.nii.gz  | -0.78    | -5.21e-03 | -1.83e-02 | 7.85e-03 | .531     | 2.86e-05 | 5.35e-03 |
| Atlas_Basal_Ganglia_and_Thalamus_R_Acc.nii.gz         | 0.79     | 5.05e-03  | -7.42e-03 | 1.75e-02 | .470     | 2.95e-05 | 5.43e-03 |
| Atlas_Basal_Ganglia_and_Thalamus_R_Cau-<br>ia.nii.gz  | -1.45    | -9.42e-03 | -2.22e-02 | 3.35e-03 | .163     | 9.78e-05 | 9.89e-03 |
| Atlas_Basal_Ganglia_and_Thalamus_R_Cau-<br>im.nii.gz  | -0.87    | -5.56e-03 | -1.81e-02 | 7.01e-03 | .424     | 3.52e-05 | 5.93e-03 |
| Atlas_Basal_Ganglia_and_Thalamus_R_Cau-<br>sa.nii.gz  | -1.26    | -8.28e-03 | -2.11e-02 | 4.56e-03 | .284     | 7.48e-05 | 8.65e-03 |
| Atlas_Basal_Ganglia_and_Thalamus_R_Cau-<br>sp.nii.gz  | -1.84    | -1.23e-02 | -2.53e-02 | 8.32e-04 | .091     | 1.58e-04 | 1.26e-02 |

**Table S15**

***ET\_PRS Lead\_DBS Extended Associations with grey matter diffusion magnetic resonance imaging (dMRI) – Fractional Anisotropy (FA)***

| Tract                                                 | <i>t</i> | $\beta$   | CI_low    | CI_up    | <i>p</i> | Eta2     | Cohens_f |
|-------------------------------------------------------|----------|-----------|-----------|----------|----------|----------|----------|
| Atlas_Basal_Ganglia_and_Thalamus_R_GPe.nii.gz         | 0.36     | 2.44e-03  | -1.07e-02 | 1.56e-02 | .835     | 6.18e-06 | 2.49e-03 |
| Atlas_Basal_Ganglia_and_Thalamus_R_GPi.nii.gz         | -0.44    | -2.91e-03 | -1.60e-02 | 1.02e-02 | .730     | 8.87e-06 | 2.98e-03 |
| Atlas_Basal_Ganglia_and_Thalamus_R_Put-<br>ia.nii.gz  | 0.61     | 3.93e-03  | -8.63e-03 | 1.65e-02 | .594     | 1.76e-05 | 4.20e-03 |
| Atlas_Basal_Ganglia_and_Thalamus_R_Put-<br>im.nii.gz  | 0.69     | 4.39e-03  | -8.08e-03 | 1.69e-02 | .599     | 2.23e-05 | 4.73e-03 |
| Atlas_Basal_Ganglia_and_Thalamus_R_Put-<br>sa.nii.gz  | 0.23     | 1.45e-03  | -1.11e-02 | 1.40e-02 | .902     | 2.42e-06 | 1.56e-03 |
| Atlas_Basal_Ganglia_and_Thalamus_R_Put-<br>sm.nii.gz  | 0.69     | 4.45e-03  | -8.25e-03 | 1.71e-02 | .542     | 2.21e-05 | 4.70e-03 |
| Atlas_Basal_Ganglia_and_Thalamus_R_Put-<br>sp.nii.gz  | 0.26     | 1.72e-03  | -1.14e-02 | 1.48e-02 | .876     | 3.12e-06 | 1.77e-03 |
| Atlas_Basal_Ganglia_and_Thalamus_R_SN.nii.gz          | -0.02    | -1.27e-04 | -1.32e-02 | 1.29e-02 | 1.00     | 1.70e-08 | 1.30e-04 |
| Atlas_Basal_Ganglia_and_Thalamus_R_STN.nii.gz         | 0.43     | 2.91e-03  | -1.04e-02 | 1.62e-02 | .816     | 8.64e-06 | 2.94e-03 |
| Atlas_Basal_Ganglia_and_Thalamus_R_Tha-<br>a.nii.gz   | 0.08     | 5.15e-04  | -1.25e-02 | 1.35e-02 | 1.00     | 2.83e-07 | 5.32e-04 |
| Atlas_Basal_Ganglia_and_Thalamus_R_Tha-<br>ld.nii.gz  | -0.34    | -2.30e-03 | -1.55e-02 | 1.09e-02 | .805     | 5.50e-06 | 2.35e-03 |
| Atlas_Basal_Ganglia_and_Thalamus_R_Tha-<br>lp.nii.gz  | -0.52    | -3.55e-03 | -1.68e-02 | 9.72e-03 | .734     | 1.29e-05 | 3.59e-03 |
| Atlas_Basal_Ganglia_and_Thalamus_R_Tha-<br>lpu.nii.gz | <0.01    | 1.81e-06  | -1.32e-02 | 1.33e-02 | 1.00     | 3.38e-12 | 1.84e-06 |



**Table S15**

***ET\_PRS Lead\_DBS Extended Associations with grey matter diffusion magnetic resonance imaging (dMRI) – Fractional Anisotropy (FA)***

| Tract                                                 | <i>t</i> | $\beta$   | CI_low    | CI_up    | <i>p</i> | Eta2     | Cohens_f |
|-------------------------------------------------------|----------|-----------|-----------|----------|----------|----------|----------|
| Atlas_Basal_Ganglia_and_Thalamus_R_Tha-<br>md.nii.gz  | -0.84    | -5.57e-03 | -1.86e-02 | 7.44e-03 | .441     | 3.30e-05 | 5.74e-03 |
| Atlas_Basal_Ganglia_and_Thalamus_R_Tha-<br>mpu.nii.gz | -0.71    | -4.70e-03 | -1.77e-02 | 8.26e-03 | .583     | 2.37e-05 | 4.87e-03 |
| Atlas_Basal_Ganglia_and_Thalamus_R_Tha-<br>vp.nii.gz  | -0.46    | -3.12e-03 | -1.64e-02 | 1.01e-02 | .788     | 9.97e-06 | 3.16e-03 |
| DISTAL_L_1.nii.gz                                     | -0.89    | -5.62e-03 | -1.80e-02 | 6.75e-03 | .513     | 3.72e-05 | 6.10e-03 |
| DISTAL_L_100.nii.gz                                   | 0.46     | 3.14e-03  | -1.02e-02 | 1.64e-02 | .884     | 1.01e-05 | 3.17e-03 |
| DISTAL_L_101.nii.gz                                   | 0.10     | 6.43e-04  | -1.26e-02 | 1.39e-02 | 1.00     | 4.24e-07 | 6.51e-04 |
| DISTAL_L_105.nii.gz                                   | -1.10    | -7.41e-03 | -2.06e-02 | 5.81e-03 | .499     | 5.65e-05 | 7.52e-03 |
| DISTAL_L_106.nii.gz                                   | 0.03     | 2.00e-04  | -1.29e-02 | 1.33e-02 | 1.00     | 4.21e-08 | 2.05e-04 |
| DISTAL_L_107.nii.gz                                   | 0.66     | 4.45e-03  | -8.82e-03 | 1.77e-02 | .624     | 2.02e-05 | 4.50e-03 |
| DISTAL_L_108.nii.gz                                   | 0.50     | 3.30e-03  | -9.69e-03 | 1.63e-02 | .756     | 1.16e-05 | 3.41e-03 |
| DISTAL_L_109.nii.gz                                   | -1.34    | -8.27e-03 | -2.04e-02 | 3.82e-03 | .283     | 8.41e-05 | 9.17e-03 |
| DISTAL_L_110.nii.gz                                   | 0.31     | 2.07e-03  | -1.11e-02 | 1.52e-02 | .926     | 4.45e-06 | 2.11e-03 |
| DISTAL_L_111.nii.gz                                   | -0.20    | -1.38e-03 | -1.46e-02 | 1.19e-02 | .923     | 1.94e-06 | 1.39e-03 |
| DISTAL_L_112.nii.gz                                   | 0.92     | 6.23e-03  | -7.04e-03 | 1.95e-02 | .634     | 3.97e-05 | 6.30e-03 |
| DISTAL_L_118.nii.gz                                   | -0.17    | -1.18e-03 | -1.44e-02 | 1.20e-02 | .947     | 1.43e-06 | 1.20e-03 |
| DISTAL_L_14.nii.gz                                    | 1.27     | 8.25e-03  | -4.45e-03 | 2.09e-02 | .279     | 7.58e-05 | 8.71e-03 |
| DISTAL_L_16.nii.gz                                    | -0.96    | -6.33e-03 | -1.92e-02 | 6.58e-03 | .430     | 4.32e-05 | 6.57e-03 |
| DISTAL_L_2.nii.gz                                     | -0.01    | -5.92e-05 | -1.19e-02 | 1.18e-02 | 1.00     | 4.51e-09 | 6.71e-05 |
| DISTAL_L_24.nii.gz                                    | 1.14     | 7.68e-03  | -5.52e-03 | 2.09e-02 | .280     | 6.09e-05 | 7.80e-03 |
| DISTAL_L_26.nii.gz                                    | -0.92    | -6.25e-03 | -1.95e-02 | 7.02e-03 | .392     | 3.99e-05 | 6.32e-03 |

Table S15

*ET\_PRS Lead\_DBs Extended Associations with grey matter diffusion magnetic resonance imaging (dMRI) – Fractional Anisotropy (FA)*

| Tract                     | <i>t</i>     | $\beta$          | CI_low           | CI_up            | <i>p</i>    | Eta2            | Cohens_f        |
|---------------------------|--------------|------------------|------------------|------------------|-------------|-----------------|-----------------|
| <b>DISTAL_L_28.nii.gz</b> | <b>-2.80</b> | <b>-1.73e-02</b> | <b>-2.95e-02</b> | <b>-5.20e-03</b> | <b>.006</b> | <b>3.67e-04</b> | <b>1.92e-02</b> |
| DISTAL_L_29.nii.gz        | 0.53         | 3.46e-03         | -9.28e-03        | 1.62e-02         | .818        | 1.33e-05        | 3.64e-03        |
| DISTAL_L_35.nii.gz        | -1.22        | -7.48e-03        | -1.94e-02        | 4.49e-03         | .270        | 7.02e-05        | 8.38e-03        |
| DISTAL_L_36.nii.gz        | -0.15        | -1.02e-03        | -1.43e-02        | 1.22e-02         | .968        | 1.07e-06        | 1.04e-03        |
| DISTAL_L_37.nii.gz        | -0.31        | -2.06e-03        | -1.51e-02        | 1.10e-02         | .833        | 4.48e-06        | 2.12e-03        |
| DISTAL_L_4.nii.gz         | 0.92         | 6.31e-03         | -7.07e-03        | 1.97e-02         | .651        | 4.00e-05        | 6.33e-03        |
| DISTAL_L_40.nii.gz        | 0.41         | 2.80e-03         | -1.04e-02        | 1.60e-02         | .746        | 8.06e-06        | 2.84e-03        |
| DISTAL_L_47.nii.gz        | -0.57        | -3.83e-03        | -1.70e-02        | 9.35e-03         | .663        | 1.52e-05        | 3.90e-03        |
| DISTAL_L_49.nii.gz        | -1.00        | -6.72e-03        | -1.98e-02        | 6.39e-03         | .433        | 4.73e-05        | 6.88e-03        |
| DISTAL_L_6.nii.gz         | -0.57        | -3.86e-03        | -1.70e-02        | 9.31e-03         | .732        | 1.54e-05        | 3.93e-03        |
| DISTAL_L_60.nii.gz        | 0.33         | 2.27e-03         | -1.10e-02        | 1.56e-02         | 1.00        | 5.22e-06        | 2.28e-03        |
| DISTAL_L_63.nii.gz        | -0.16        | -1.09e-03        | -1.42e-02        | 1.20e-02         | .958        | 1.24e-06        | 1.11e-03        |
| DISTAL_L_68.nii.gz        | 0.34         | 2.25e-03         | -1.09e-02        | 1.54e-02         | .811        | 5.26e-06        | 2.29e-03        |
| DISTAL_L_7.nii.gz         | 0.36         | 2.36e-03         | -1.03e-02        | 1.51e-02         | .894        | 6.21e-06        | 2.49e-03        |
| DISTAL_L_70.nii.gz        | -0.62        | -4.17e-03        | -1.74e-02        | 9.02e-03         | .654        | 1.80e-05        | 4.24e-03        |
| DISTAL_L_76.nii.gz        | -0.38        | -2.54e-03        | -1.55e-02        | 1.05e-02         | .772        | 6.87e-06        | 2.62e-03        |
| DISTAL_L_8.nii.gz         | 0.57         | 3.72e-03         | -9.13e-03        | 1.66e-02         | .697        | 1.51e-05        | 3.88e-03        |
| DISTAL_L_86.nii.gz        | -0.43        | -2.84e-03        | -1.59e-02        | 1.02e-02         | .819        | 8.50e-06        | 2.91e-03        |
| DISTAL_L_87.nii.gz        | -0.03        | -1.85e-04        | -1.33e-02        | 1.29e-02         | 1.00        | 3.59e-08        | 1.90e-04        |
| DISTAL_L_89.nii.gz        | -0.58        | -3.92e-03        | -1.71e-02        | 9.27e-03         | .616        | 1.59e-05        | 3.99e-03        |
| DISTAL_L_91.nii.gz        | -1.03        | -6.92e-03        | -2.01e-02        | 6.26e-03         | .477        | 4.96e-05        | 7.04e-03        |
| DISTAL_L_92.nii.gz        | -0.65        | -4.40e-03        | -1.76e-02        | 8.84e-03         | .708        | 1.99e-05        | 4.46e-03        |
| DISTAL_L_93.nii.gz        | -0.56        | -3.73e-03        | -1.68e-02        | 9.37e-03         | .705        | 1.46e-05        | 3.82e-03        |

Table S15

*ET\_PRS Lead\_DBs Extended Associations with grey matter diffusion magnetic resonance imaging (dMRI) – Fractional Anisotropy (FA)*

| Tract                            | <i>t</i>     | $\beta$          | CI_low           | CI_up            | <i>p</i>    | Eta2            | Cohens_f        |
|----------------------------------|--------------|------------------|------------------|------------------|-------------|-----------------|-----------------|
| DISTAL_L_94.nii.gz               | -0.66        | -4.44e-03        | -1.76e-02        | 8.74e-03         | .622        | 2.04e-05        | 4.52e-03        |
| <b>DISTAL_L_97.nii.gz</b>        | <b>-2.41</b> | <b>-1.64e-02</b> | <b>-2.98e-02</b> | <b>-3.07e-03</b> | <b>.025</b> | <b>2.72e-04</b> | <b>1.65e-02</b> |
| DISTAL_L_98.nii.gz               | -0.63        | -4.24e-03        | -1.75e-02        | 9.03e-03         | .730        | 1.84e-05        | 4.29e-03        |
| DISTAL_L_GPe.nii.gz              | 0.20         | 1.31e-03         | -1.18e-02        | 1.44e-02         | .929        | 1.80e-06        | 1.34e-03        |
| DISTAL_L_GPi_sensorimotor.nii.gz | 0.54         | 3.61e-03         | -9.53e-03        | 1.68e-02         | .721        | 1.36e-05        | 3.69e-03        |
| DISTAL_L_GPi.nii.gz              | 0.55         | 3.71e-03         | -9.43e-03        | 1.69e-02         | .798        | 1.43e-05        | 3.79e-03        |
| <b>DISTAL_L_RN.nii.gz</b>        | <b>3.56</b>  | <b>2.38e-02</b>  | <b>1.07e-02</b>  | <b>3.68e-02</b>  | <b>.001</b> | <b>5.94e-04</b> | <b>2.44e-02</b> |
| DISTAL_L_STN_associative.nii.gz  | 1.37         | 9.28e-03         | -4.00e-03        | 2.26e-02         | .235        | 8.79e-05        | 9.38e-03        |
| DISTAL_L_STN_limbic.nii.gz       | -1.03        | -7.00e-03        | -2.03e-02        | 6.30e-03         | .406        | 4.99e-05        | 7.06e-03        |
| DISTAL_L_STN_motor.nii.gz        | 1.16         | 7.86e-03         | -5.37e-03        | 2.11e-02         | .448        | 6.35e-05        | 7.97e-03        |
| DISTAL_L_STN.nii.gz              | 1.13         | 7.62e-03         | -5.61e-03        | 2.08e-02         | .475        | 5.97e-05        | 7.72e-03        |
| DISTAL_R_1.nii.gz                | -0.46        | -2.90e-03        | -1.52e-02        | 9.44e-03         | .788        | 9.96e-06        | 3.16e-03        |
| DISTAL_R_100.nii.gz              | -0.71        | -4.79e-03        | -1.79e-02        | 8.36e-03         | .523        | 2.39e-05        | 4.89e-03        |
| DISTAL_R_101.nii.gz              | -0.23        | -1.54e-03        | -1.48e-02        | 1.17e-02         | .902        | 2.43e-06        | 1.56e-03        |
| DISTAL_R_105.nii.gz              | 1.44         | 9.74e-03         | -3.50e-03        | 2.30e-02         | .329        | 9.73e-05        | 9.87e-03        |
| DISTAL_R_106.nii.gz              | -0.72        | -4.75e-03        | -1.78e-02        | 8.27e-03         | .653        | 2.39e-05        | 4.89e-03        |
| DISTAL_R_107.nii.gz              | -0.66        | -4.39e-03        | -1.75e-02        | 8.73e-03         | .703        | 2.02e-05        | 4.49e-03        |
| DISTAL_R_108.nii.gz              | 0.49         | 3.25e-03         | -9.73e-03        | 1.62e-02         | .686        | 1.13e-05        | 3.36e-03        |
| DISTAL_R_109.nii.gz              | -1.45        | -9.05e-03        | -2.13e-02        | 3.17e-03         | .230        | 9.87e-05        | 9.94e-03        |
| DISTAL_R_110.nii.gz              | 0.34         | 2.28e-03         | -1.09e-02        | 1.54e-02         | .807        | 5.42e-06        | 2.33e-03        |
| DISTAL_R_111.nii.gz              | 0.50         | 3.39e-03         | -9.81e-03        | 1.66e-02         | .840        | 1.19e-05        | 3.45e-03        |
| DISTAL_R_112.nii.gz              | 0.89         | 6.04e-03         | -7.19e-03        | 1.93e-02         | .596        | 3.75e-05        | 6.13e-03        |
| DISTAL_R_118.nii.gz              | -0.01        | -5.82e-05        | -1.33e-02        | 1.32e-02         | 1.00        | 3.46e-09        | 5.88e-05        |

**Table S15**

***ET\_PRS Lead\_DBS Extended Associations with grey matter diffusion magnetic resonance imaging (dMRI) – Fractional Anisotropy (FA)***

| Tract              | <i>t</i> | $\beta$   | CI_low    | CI_up    | <i>p</i> | Eta2     | Cohens_f |
|--------------------|----------|-----------|-----------|----------|----------|----------|----------|
| DISTAL_R_13.nii.gz | -0.43    | -2.87e-03 | -1.61e-02 | 1.03e-02 | .811     | 8.48e-06 | 2.91e-03 |
| DISTAL_R_14.nii.gz | 0.79     | 5.06e-03  | -7.47e-03 | 1.76e-02 | .524     | 2.93e-05 | 5.41e-03 |
| DISTAL_R_16.nii.gz | -1.82    | -1.18e-02 | -2.46e-02 | 9.30e-04 | .096     | 1.55e-04 | 1.24e-02 |
| DISTAL_R_2.nii.gz  | -0.59    | -3.51e-03 | -1.52e-02 | 8.15e-03 | .679     | 1.63e-05 | 4.04e-03 |
| DISTAL_R_24.nii.gz | 1.02     | 6.86e-03  | -6.29e-03 | 2.00e-02 | .375     | 4.90e-05 | 7.00e-03 |
| DISTAL_R_26.nii.gz | -0.13    | -8.52e-04 | -1.40e-02 | 1.23e-02 | 1.00     | 7.53e-07 | 8.68e-04 |
| DISTAL_R_28.nii.gz | -1.90    | -1.18e-02 | -2.41e-02 | 3.94e-04 | .071     | 1.69e-04 | 1.30e-02 |
| DISTAL_R_29.nii.gz | 0.63     | 4.07e-03  | -8.59e-03 | 1.67e-02 | .646     | 1.86e-05 | 4.31e-03 |
| DISTAL_R_35.nii.gz | -0.73    | -4.45e-03 | -1.65e-02 | 7.58e-03 | .515     | 2.47e-05 | 4.97e-03 |
| DISTAL_R_36.nii.gz | 0.80     | 5.38e-03  | -7.82e-03 | 1.86e-02 | .710     | 2.99e-05 | 5.47e-03 |
| DISTAL_R_37.nii.gz | -0.83    | -5.49e-03 | -1.85e-02 | 7.54e-03 | .450     | 3.20e-05 | 5.65e-03 |
| DISTAL_R_4.nii.gz  | 1.23     | 8.43e-03  | -4.95e-03 | 2.18e-02 | .298     | 7.14e-05 | 8.45e-03 |
| DISTAL_R_40.nii.gz | -0.42    | -2.85e-03 | -1.61e-02 | 1.04e-02 | .823     | 8.34e-06 | 2.89e-03 |
| DISTAL_R_47.nii.gz | -0.18    | -1.21e-03 | -1.43e-02 | 1.18e-02 | .985     | 1.56e-06 | 1.25e-03 |
| DISTAL_R_49.nii.gz | -1.28    | -8.53e-03 | -2.16e-02 | 4.55e-03 | .277     | 7.65e-05 | 8.75e-03 |
| DISTAL_R_6.nii.gz  | -0.12    | -8.38e-04 | -1.40e-02 | 1.23e-02 | .991     | 7.32e-07 | 8.55e-04 |
| DISTAL_R_60.nii.gz | -0.33    | -2.20e-03 | -1.54e-02 | 1.11e-02 | 1.00     | 4.95e-06 | 2.22e-03 |
| DISTAL_R_63.nii.gz | 0.96     | 6.45e-03  | -6.70e-03 | 1.96e-02 | .452     | 4.33e-05 | 6.58e-03 |
| DISTAL_R_68.nii.gz | 0.02     | 1.48e-04  | -1.30e-02 | 1.33e-02 | 1.00     | 2.27e-08 | 1.51e-04 |
| DISTAL_R_7.nii.gz  | -0.15    | -9.57e-04 | -1.37e-02 | 1.18e-02 | .971     | 1.02e-06 | 1.01e-03 |
| DISTAL_R_70.nii.gz | -1.69    | -1.15e-02 | -2.48e-02 | 1.82e-03 | .333     | 1.34e-04 | 1.16e-02 |
| DISTAL_R_76.nii.gz | 0.50     | 3.39e-03  | -9.82e-03 | 1.66e-02 | .677     | 1.18e-05 | 3.44e-03 |
| DISTAL_R_8.nii.gz  | -0.76    | -5.00e-03 | -1.78e-02 | 7.82e-03 | .543     | 2.74e-05 | 5.23e-03 |

Table S15

*ET\_PRS Lead\_DBS Extended Associations with grey matter diffusion magnetic resonance imaging (dMRI) – Fractional Anisotropy (FA)*

| Tract                                        | <i>t</i>     | $\beta$          | CI_low           | CI_up            | <i>p</i>    | Eta2            | Cohens_f        |
|----------------------------------------------|--------------|------------------|------------------|------------------|-------------|-----------------|-----------------|
| DISTAL_R_86.nii.gz                           | -0.82        | -5.50e-03        | -1.86e-02        | 7.62e-03         | .452        | 3.16e-05        | 5.62e-03        |
| DISTAL_R_87.nii.gz                           | 0.11         | 7.64e-04         | -1.24e-02        | 1.39e-02         | 1.00        | 6.06e-07        | 7.78e-04        |
| DISTAL_R_89.nii.gz                           | -0.46        | -3.08e-03        | -1.63e-02        | 1.01e-02         | .712        | 9.82e-06        | 3.13e-03        |
| DISTAL_R_91.nii.gz                           | -1.10        | -7.37e-03        | -2.06e-02        | 5.81e-03         | .429        | 5.63e-05        | 7.50e-03        |
| DISTAL_R_92.nii.gz                           | 0.42         | 2.83e-03         | -1.04e-02        | 1.61e-02         | .743        | 8.20e-06        | 2.86e-03        |
| DISTAL_R_93.nii.gz                           | -1.08        | -7.23e-03        | -2.03e-02        | 5.89e-03         | .343        | 5.46e-05        | 7.39e-03        |
| DISTAL_R_94.nii.gz                           | 0.13         | 8.83e-04         | -1.24e-02        | 1.41e-02         | .986        | 7.98e-07        | 8.93e-04        |
| DISTAL_R_97.nii.gz                           | -1.05        | -7.15e-03        | -2.05e-02        | 6.22e-03         | .463        | 5.15e-05        | 7.17e-03        |
| DISTAL_R_GPe.nii.gz                          | 0.20         | 1.38e-03         | -1.18e-02        | 1.46e-02         | 1.00        | 1.96e-06        | 1.40e-03        |
| DISTAL_R_GPi_sensorimotor.nii.gz             | -0.40        | -2.69e-03        | -1.59e-02        | 1.05e-02         | .842        | 7.50e-06        | 2.74e-03        |
| DISTAL_R_GPi.nii.gz                          | -1.34        | -9.01e-03        | -2.22e-02        | 4.18e-03         | .284        | 8.39e-05        | 9.16e-03        |
| <b>DISTAL_R_RN.nii.gz</b>                    | <b>3.32</b>  | <b>2.21e-02</b>  | <b>9.06e-03</b>  | <b>3.51e-02</b>  | <b>.002</b> | <b>5.17e-04</b> | <b>2.27e-02</b> |
| DISTAL_R_STN_associative.nii.gz              | -0.54        | -3.65e-03        | -1.69e-02        | 9.57e-03         | .647        | 1.37e-05        | 3.70e-03        |
| DISTAL_R_STN_limbic.nii.gz                   | 0.52         | 3.52e-03         | -9.69e-03        | 1.67e-02         | .827        | 1.28e-05        | 3.58e-03        |
| DISTAL_R_STN_motor.nii.gz                    | -0.53        | -3.53e-03        | -1.67e-02        | 9.64e-03         | .875        | 1.29e-05        | 3.59e-03        |
| DISTAL_R_STN.nii.gz                          | -0.57        | -3.83e-03        | -1.70e-02        | 9.37e-03         | .626        | 1.52e-05        | 3.89e-03        |
| <b>Human_Motor_Thalamus_L_A.nii.gz</b>       | <b>-2.63</b> | <b>-1.60e-02</b> | <b>-2.78e-02</b> | <b>-4.09e-03</b> | <b>.010</b> | <b>3.25e-04</b> | <b>1.80e-02</b> |
| Human_Motor_Thalamus_L_acbcbssc.nii.gz       | 1.13         | 7.70e-03         | -5.62e-03        | 2.10e-02         | .354        | 6.01e-05        | 7.76e-03        |
| Human_Motor_Thalamus_L_alfrfxmtpc.nii.gz     | -0.61        | -3.83e-03        | -1.61e-02        | 8.48e-03         | .662        | 1.74e-05        | 4.18e-03        |
| Human_Motor_Thalamus_L_BasalForebrain.nii.gz | 1.04         | 6.71e-03         | -5.89e-03        | 1.93e-02         | .363        | 5.10e-05        | 7.14e-03        |
| Human_Motor_Thalamus_L_CdPutVSt.nii.gz       | -1.84        | -1.18e-02        | -2.43e-02        | 7.87e-04         | .121        | 1.58e-04        | 1.26e-02        |
| Human_Motor_Thalamus_L_CMPf.nii.gz           | -0.55        | -3.68e-03        | -1.67e-02        | 9.36e-03         | .709        | 1.43e-05        | 3.78e-03        |
| Human_Motor_Thalamus_L_eml.nii.gz            | 0.88         | 5.87e-03         | -7.20e-03        | 1.89e-02         | .463        | 3.62e-05        | 6.02e-03        |

Table S15

*ET\_PRS Lead\_DBs Extended Associations with grey matter diffusion magnetic resonance imaging (dMRI) – Fractional Anisotropy (FA)*

| Tract                                      | <i>t</i>    | $\beta$         | CI_low          | CI_up           | <i>p</i>    | Eta2            | Cohens_f        |
|--------------------------------------------|-------------|-----------------|-----------------|-----------------|-------------|-----------------|-----------------|
| Human_Motor_Thalamus_L_GPl.nii.gz          | 0.25        | 1.67e-03        | -1.14e-02       | 1.47e-02        | .882        | 2.96e-06        | 1.72e-03        |
| Human_Motor_Thalamus_L_GPm.nii.gz          | 0.57        | 3.80e-03        | -9.33e-03       | 1.69e-02        | .887        | 1.51e-05        | 3.88e-03        |
| Human_Motor_Thalamus_L_Hbl.nii.gz          | -0.60       | -3.96e-03       | -1.69e-02       | 8.94e-03        | .602        | 1.70e-05        | 4.12e-03        |
| Human_Motor_Thalamus_L_Hypothalamus.nii.gz | -0.01       | -5.68e-05       | -1.30e-02       | 1.29e-02        | 1.00        | 3.46e-09        | 5.89e-05        |
| Human_Motor_Thalamus_L_ic.nii.gz           | 0.49        | 3.32e-03        | -1.00e-02       | 1.67e-02        | .859        | 1.12e-05        | 3.35e-03        |
| Human_Motor_Thalamus_L_LD.nii.gz           | -1.68       | -1.03e-02       | -2.24e-02       | 1.75e-03        | .103        | 1.32e-04        | 1.15e-02        |
| Human_Motor_Thalamus_L_LG.nii.gz           | -0.22       | -1.49e-03       | -1.45e-02       | 1.15e-02        | .962        | 2.36e-06        | 1.54e-03        |
| Human_Motor_Thalamus_L_Li.nii.gz           | -1.05       | -7.09e-03       | -2.03e-02       | 6.11e-03        | .536        | 5.19e-05        | 7.21e-03        |
| Human_Motor_Thalamus_L_M.nii.gz            | 0.80        | 5.43e-03        | -7.82e-03       | 1.87e-02        | .663        | 3.02e-05        | 5.49e-03        |
| Human_Motor_Thalamus_L_MB.nii.gz           | 0.76        | 4.85e-03        | -7.67e-03       | 1.74e-02        | .615        | 2.70e-05        | 5.20e-03        |
| Human_Motor_Thalamus_L_MD.nii.gz           | -0.55       | -3.67e-03       | -1.67e-02       | 9.33e-03        | .638        | 1.44e-05        | 3.79e-03        |
| Human_Motor_Thalamus_L_MDCL.nii.gz         | -0.09       | -6.09e-04       | -1.38e-02       | 1.26e-02        | 1.00        | 3.85e-07        | 6.21e-04        |
| Human_Motor_Thalamus_L_MG.nii.gz           | 0.61        | 4.10e-03        | -9.01e-03       | 1.72e-02        | .660        | 1.76e-05        | 4.19e-03        |
| Human_Motor_Thalamus_L_MI.nii.gz           | -0.13       | -8.55e-04       | -1.33e-02       | 1.16e-02        | .982        | 8.45e-07        | 9.19e-04        |
| Human_Motor_Thalamus_L_Midbrain.nii.gz     | 0.42        | 2.77e-03        | -1.03e-02       | 1.59e-02        | .746        | 8.07e-06        | 2.84e-03        |
| Human_Motor_Thalamus_L_ot.nii.gz           | 0.42        | 2.78e-03        | -1.03e-02       | 1.59e-02        | .932        | 8.07e-06        | 2.84e-03        |
| Human_Motor_Thalamus_L_Po.nii.gz           | 0.65        | 4.39e-03        | -8.92e-03       | 1.77e-02        | .726        | 1.96e-05        | 4.43e-03        |
| Human_Motor_Thalamus_L_PPN.nii.gz          | 1.95        | 1.32e-02        | -9.93e-05       | 2.64e-02        | .057        | 1.77e-04        | 1.33e-02        |
| Human_Motor_Thalamus_L_Pul.nii.gz          | -0.23       | -1.55e-03       | -1.47e-02       | 1.15e-02        | .898        | 2.53e-06        | 1.59e-03        |
| <b>Human_Motor_Thalamus_L_R.nii.gz</b>     | <b>3.52</b> | <b>2.36e-02</b> | <b>1.05e-02</b> | <b>3.68e-02</b> | <b>.001</b> | <b>5.82e-04</b> | <b>2.41e-02</b> |
| Human_Motor_Thalamus_L_Rt.nii.gz           | -0.36       | -2.47e-03       | -1.57e-02       | 1.08e-02        | .787        | 6.23e-06        | 2.50e-03        |
| Human_Motor_Thalamus_L_SN.nii.gz           | -0.29       | -1.92e-03       | -1.51e-02       | 1.13e-02        | .853        | 3.82e-06        | 1.96e-03        |
| Human_Motor_Thalamus_L_STN.nii.gz          | 0.79        | 5.32e-03        | -7.93e-03       | 1.86e-02        | .790        | 2.90e-05        | 5.39e-03        |

**Table S15**

***ET\_PRS Lead\_DBS Extended Associations with grey matter diffusion magnetic resonance imaging (dMRI) – Fractional Anisotropy (FA)***

| Tract                                              | <i>t</i> | $\beta$   | CI_low    | CI_up    | <i>p</i> | Eta2     | Cohens_f |
|----------------------------------------------------|----------|-----------|-----------|----------|----------|----------|----------|
| Human_Motor_Thalamus_L_VAn.nii.gz                  | -0.87    | -5.88e-03 | -1.92e-02 | 7.41e-03 | .542     | 3.52e-05 | 5.94e-03 |
| Human_Motor_Thalamus_L_VAp.nii.gz                  | -0.40    | -2.67e-03 | -1.59e-02 | 1.05e-02 | .761     | 7.38e-06 | 2.72e-03 |
| Human_Motor_Thalamus_L_VLdVLv.nii.gz               | -0.42    | -2.85e-03 | -1.61e-02 | 1.04e-02 | .740     | 8.34e-06 | 2.89e-03 |
| Human_Motor_Thalamus_L_VPi.nii.gz                  | 1.31     | 8.86e-03  | -4.38e-03 | 2.21e-02 | .298     | 8.05e-05 | 8.97e-03 |
| Human_Motor_Thalamus_L_VPIVPm.nii.gz               | -1.02    | -6.88e-03 | -2.01e-02 | 6.38e-03 | .378     | 4.84e-05 | 6.96e-03 |
| Human_Motor_Thalamus_R_A.nii.gz                    | -1.87    | -1.14e-02 | -2.34e-02 | 5.56e-04 | .075     | 1.64e-04 | 1.28e-02 |
| Human_Motor_Thalamus_R_acbcbssc.nii.gz             | 1.46     | 9.89e-03  | -3.41e-03 | 2.32e-02 | .218     | 9.94e-05 | 9.97e-03 |
| Human_Motor_Thalamus_R_alfrfxmtpc.nii.gz           | -0.43    | -2.62e-03 | -1.46e-02 | 9.38e-03 | .736     | 8.56e-06 | 2.93e-03 |
| Human_Motor_Thalamus_R_BasalForebrain.nii.gz       | 0.99     | 6.39e-03  | -6.24e-03 | 1.90e-02 | .393     | 4.61e-05 | 6.79e-03 |
| Human_Motor_Thalamus_R_CdPutVSt.nii.gz             | -1.15    | -7.42e-03 | -2.01e-02 | 5.27e-03 | .462     | 6.15e-05 | 7.84e-03 |
| Human_Motor_Thalamus_R_CMPf.nii.gz                 | -1.05    | -7.01e-03 | -2.00e-02 | 6.03e-03 | .435     | 5.20e-05 | 7.21e-03 |
| Human_Motor_Thalamus_R_Connectivetissue.nii.g<br>z | -1.72    | -1.13e-02 | -2.42e-02 | 1.59e-03 | .118     | 1.38e-04 | 1.18e-02 |
| Human_Motor_Thalamus_R_eml.nii.gz                  | 0.91     | 6.04e-03  | -6.98e-03 | 1.91e-02 | .444     | 3.87e-05 | 6.22e-03 |
| Human_Motor_Thalamus_R_GPI.nii.gz                  | 0.28     | 1.89e-03  | -1.13e-02 | 1.51e-02 | .856     | 3.70e-06 | 1.92e-03 |
| Human_Motor_Thalamus_R_GPm.nii.gz                  | -0.99    | -6.66e-03 | -1.99e-02 | 6.54e-03 | .394     | 4.58e-05 | 6.77e-03 |
| Human_Motor_Thalamus_R_Hbl.nii.gz                  | -0.41    | -2.67e-03 | -1.56e-02 | 1.02e-02 | .754     | 7.70e-06 | 2.78e-03 |
| Human_Motor_Thalamus_R_Hypothalamus.nii.gz         | 0.59     | 3.88e-03  | -9.06e-03 | 1.68e-02 | .612     | 1.62e-05 | 4.02e-03 |
| Human_Motor_Thalamus_R_ic.nii.gz                   | 0.87     | 5.88e-03  | -7.43e-03 | 1.92e-02 | .531     | 3.52e-05 | 5.93e-03 |
| Human_Motor_Thalamus_R_LD.nii.gz                   | -1.92    | -1.18e-02 | -2.40e-02 | 2.66e-04 | .076     | 1.72e-04 | 1.31e-02 |
| Human_Motor_Thalamus_R_LG.nii.gz                   | -0.35    | -2.32e-03 | -1.52e-02 | 1.06e-02 | .835     | 5.80e-06 | 2.41e-03 |
| Human_Motor_Thalamus_R_Li.nii.gz                   | -0.86    | -5.85e-03 | -1.91e-02 | 7.41e-03 | .692     | 3.50e-05 | 5.92e-03 |
| Human_Motor_Thalamus_R_M.nii.gz                    | 0.49     | 3.29e-03  | -9.92e-03 | 1.65e-02 | .764     | 1.12e-05 | 3.34e-03 |

Table S15

*ET\_PRS Lead\_DBs Extended Associations with grey matter diffusion magnetic resonance imaging (dMRI) – Fractional Anisotropy (FA)*

| Tract                                  | <i>t</i>     | $\beta$          | CI_low           | CI_up            | <i>p</i>    | Eta2            | Cohens_f        |
|----------------------------------------|--------------|------------------|------------------|------------------|-------------|-----------------|-----------------|
| Human_Motor_Thalamus_R_MB.nii.gz       | 0.49         | 3.08e-03         | -9.35e-03        | 1.55e-02         | .767        | 1.10e-05        | 3.32e-03        |
| Human_Motor_Thalamus_R_MD.nii.gz       | -0.86        | -5.66e-03        | -1.86e-02        | 7.29e-03         | .431        | 3.43e-05        | 5.86e-03        |
| Human_Motor_Thalamus_R_MDCL.nii.gz     | 0.49         | 3.27e-03         | -9.91e-03        | 1.65e-02         | .766        | 1.11e-05        | 3.33e-03        |
| Human_Motor_Thalamus_R_MG.nii.gz       | 0.24         | 1.59e-03         | -1.15e-02        | 1.47e-02         | .993        | 2.63e-06        | 1.62e-03        |
| Human_Motor_Thalamus_R_MGC.nii.gz      | -1.71        | -1.17e-02        | -2.50e-02        | 1.71e-03         | .120        | 1.37e-04        | 1.17e-02        |
| Human_Motor_Thalamus_R_MI.nii.gz       | 0.63         | 3.89e-03         | -8.28e-03        | 1.61e-02         | .649        | 1.84e-05        | 4.29e-03        |
| Human_Motor_Thalamus_R_Midbrain.nii.gz | 0.72         | 4.80e-03         | -8.26e-03        | 1.79e-02         | .519        | 2.43e-05        | 4.93e-03        |
| Human_Motor_Thalamus_R_ot.nii.gz       | -0.13        | -8.46e-04        | -1.35e-02        | 1.18e-02         | 1.00        | 8.09e-07        | 8.99e-04        |
| Human_Motor_Thalamus_R_PC.nii.gz       | 0.08         | 5.23e-04         | -1.24e-02        | 1.34e-02         | 1.00        | 2.96e-07        | 5.44e-04        |
| Human_Motor_Thalamus_R_Po.nii.gz       | 0.34         | 2.26e-03         | -1.09e-02        | 1.55e-02         | .811        | 5.28e-06        | 2.30e-03        |
| Human_Motor_Thalamus_R_PPN.nii.gz      | 1.95         | 1.32e-02         | -6.87e-05        | 2.64e-02         | .070        | 1.78e-04        | 1.33e-02        |
| Human_Motor_Thalamus_R_Pul.nii.gz      | -0.74        | -4.92e-03        | -1.80e-02        | 8.15e-03         | .507        | 2.55e-05        | 5.05e-03        |
| <b>Human_Motor_Thalamus_R_R.nii.gz</b> | <b>3.40</b>  | <b>2.27e-02</b>  | <b>9.59e-03</b>  | <b>3.57e-02</b>  | <b>.001</b> | <b>5.41e-04</b> | <b>2.33e-02</b> |
| Human_Motor_Thalamus_R_Rt.nii.gz       | 0.46         | 3.08e-03         | -9.92e-03        | 1.61e-02         | .706        | 1.01e-05        | 3.18e-03        |
| Human_Motor_Thalamus_R_SN.nii.gz       | 0.21         | 1.42e-03         | -1.17e-02        | 1.45e-02         | .915        | 2.11e-06        | 1.45e-03        |
| Human_Motor_Thalamus_R_STN.nii.gz      | -0.37        | -2.47e-03        | -1.56e-02        | 1.07e-02         | .785        | 6.31e-06        | 2.51e-03        |
| Human_Motor_Thalamus_R_VAn.nii.gz      | 0.48         | 3.20e-03         | -9.91e-03        | 1.63e-02         | .773        | 1.07e-05        | 3.27e-03        |
| Human_Motor_Thalamus_R_VAp.nii.gz      | 0.24         | 1.62e-03         | -1.15e-02        | 1.48e-02         | .890        | 2.74e-06        | 1.65e-03        |
| Human_Motor_Thalamus_R_VLdVLv.nii.gz   | 0.04         | 2.91e-04         | -1.29e-02        | 1.35e-02         | 1.00        | 8.73e-08        | 2.96e-04        |
| Human_Motor_Thalamus_R_VPi.nii.gz      | 1.86         | 1.26e-02         | -7.09e-04        | 2.59e-02         | .140        | 1.61e-04        | 1.27e-02        |
| Human_Motor_Thalamus_R_VPIVPm.nii.gz   | 0.03         | 1.90e-04         | -1.31e-02        | 1.35e-02         | 1.00        | 3.67e-08        | 1.91e-04        |
| <b>HybraPD_Atlas_L_Ca.nii.gz</b>       | <b>-2.22</b> | <b>-1.43e-02</b> | <b>-2.70e-02</b> | <b>-1.67e-03</b> | <b>.042</b> | <b>2.31e-04</b> | <b>1.52e-02</b> |
| HybraPD_Atlas_L_DN.nii.gz              | 0.77         | 5.18e-03         | -7.94e-03        | 1.83e-02         | .604        | 2.80e-05        | 5.29e-03        |



Table S15

*ET\_PRS Lead\_DBS Extended Associations with grey matter diffusion magnetic resonance imaging (dMRI) – Fractional Anisotropy (FA)*

| Tract                                    | <i>t</i>    | $\beta$         | CI_low          | CI_up           | <i>p</i>    | Eta2            | Cohens_f        |
|------------------------------------------|-------------|-----------------|-----------------|-----------------|-------------|-----------------|-----------------|
| HybraPD_Atlas_L_GPe.nii.gz               | -0.25       | -1.67e-03       | -1.47e-02       | 1.14e-02        | .882        | 2.94e-06        | 1.72e-03        |
| HybraPD_Atlas_L_GPi.nii.gz               | 0.86        | 5.75e-03        | -7.39e-03       | 1.89e-02        | .538        | 3.45e-05        | 5.87e-03        |
| HybraPD_Atlas_L_NAC.nii.gz               | 0.03        | 2.11e-04        | -1.26e-02       | 1.30e-02        | 1.00        | 4.93e-08        | 2.22e-04        |
| HybraPD_Atlas_L_Pu.nii.gz                | -0.47       | -2.93e-03       | -1.52e-02       | 9.34e-03        | .949        | 1.02e-05        | 3.20e-03        |
| <b>HybraPD_Atlas_L_RN.nii.gz</b>         | <b>3.61</b> | <b>2.41e-02</b> | <b>1.10e-02</b> | <b>3.73e-02</b> | <b>.001</b> | <b>6.10e-04</b> | <b>2.47e-02</b> |
| HybraPD_Atlas_L_TH.MN.nii.gz             | -0.57       | -3.81e-03       | -1.69e-02       | 9.24e-03        | .693        | 1.53e-05        | 3.91e-03        |
| HybraPD_Atlas_L_TH.P.nii.gz              | 0.38        | 2.56e-03        | -1.05e-02       | 1.56e-02        | .857        | 6.90e-06        | 2.63e-03        |
| HybraPD_Atlas_L_TH.VN.nii.gz             | -0.64       | -4.32e-03       | -1.75e-02       | 8.88e-03        | .637        | 1.93e-05        | 4.39e-03        |
| HybraPD_Atlas_R_Ca.nii.gz                | -0.86       | -5.58e-03       | -1.82e-02       | 7.07e-03        | .533        | 3.50e-05        | 5.91e-03        |
| HybraPD_Atlas_R_DN.nii.gz                | 0.62        | 4.19e-03        | -9.01e-03       | 1.74e-02        | .734        | 1.82e-05        | 4.26e-03        |
| HybraPD_Atlas_R_GPe.nii.gz               | 0.25        | 1.66e-03        | -1.15e-02       | 1.48e-02        | .983        | 2.88e-06        | 1.70e-03        |
| HybraPD_Atlas_R_GPi.nii.gz               | -1.05       | -7.03e-03       | -2.02e-02       | 6.11e-03        | .324        | 5.15e-05        | 7.18e-03        |
| HybraPD_Atlas_R_NAC.nii.gz               | 0.49        | 3.17e-03        | -9.58e-03       | 1.59e-02        | .688        | 1.11e-05        | 3.34e-03        |
| HybraPD_Atlas_R_Pu.nii.gz                | -0.33       | -2.07e-03       | -1.43e-02       | 1.02e-02        | .904        | 5.16e-06        | 2.27e-03        |
| <b>HybraPD_Atlas_R_RN.nii.gz</b>         | <b>3.29</b> | <b>2.19e-02</b> | <b>8.84e-03</b> | <b>3.49e-02</b> | <b>.002</b> | <b>5.06e-04</b> | <b>2.25e-02</b> |
| HybraPD_Atlas_R_TH.MN.nii.gz             | -1.16       | -7.73e-03       | -2.08e-02       | 5.30e-03        | .337        | 6.33e-05        | 7.95e-03        |
| HybraPD_Atlas_R_TH.P.nii.gz              | -0.85       | -5.66e-03       | -1.87e-02       | 7.38e-03        | .621        | 3.39e-05        | 5.82e-03        |
| HybraPD_Atlas_R_TH.VN.nii.gz             | 0.03        | 2.00e-04        | -1.31e-02       | 1.35e-02        | 1.00        | 4.12e-08        | 2.03e-04        |
| Melbourne_Subcortex_Atlas_LH_aCAU.nii.gz | -1.99       | -1.28e-02       | -2.54e-02       | -1.74e-04       | .074        | 1.85e-04        | 1.36e-02        |
| Melbourne_Subcortex_Atlas_LH_aGP.nii.gz  | 0.07        | 4.51e-04        | -1.28e-02       | 1.37e-02        | 1.00        | 2.09e-07        | 4.57e-04        |
| Melbourne_Subcortex_Atlas_LH_aHIP.nii.gz | 0.24        | 1.51e-03        | -1.07e-02       | 1.37e-02        | .890        | 2.74e-06        | 1.66e-03        |
| Melbourne_Subcortex_Atlas_LH_AMY.nii.gz  | 1.07        | 6.72e-03        | -5.64e-03       | 1.91e-02        | .350        | 5.32e-05        | 7.29e-03        |
| Melbourne_Subcortex_Atlas_LH_aPUT.nii.gz | -0.18       | -1.17e-03       | -1.35e-02       | 1.12e-02        | .939        | 1.60e-06        | 1.27e-03        |

Table S15

*ET\_PRS Lead\_DBs Extended Associations with grey matter diffusion magnetic resonance imaging (dMRI) – Fractional Anisotropy (FA)*

| Tract                                               | <i>t</i>     | $\beta$          | CI_low           | CI_up            | <i>p</i>    | Eta2            | Cohens_f        |
|-----------------------------------------------------|--------------|------------------|------------------|------------------|-------------|-----------------|-----------------|
| Melbourne_Subcortex_Atlas_LH_aTHA.nii.gz            | -0.96        | -6.19e-03        | -1.88e-02        | 6.41e-03         | .369        | 4.34e-05        | 6.59e-03        |
| <b>Melbourne_Subcortex_Atlas_LH_CAU-body.nii.gz</b> | <b>-2.63</b> | <b>-1.72e-02</b> | <b>-3.01e-02</b> | <b>-4.39e-03</b> | <b>.013</b> | <b>3.24e-04</b> | <b>1.80e-02</b> |
| Melbourne_Subcortex_Atlas_LH_CAU-DA.nii.gz          | -1.99        | -1.30e-02        | -2.57e-02        | -1.64e-04        | .074        | 1.85e-04        | 1.36e-02        |
| <b>Melbourne_Subcortex_Atlas_LH_CAU-tail.nii.gz</b> | <b>-2.45</b> | <b>-1.64e-02</b> | <b>-2.96e-02</b> | <b>-3.28e-03</b> | <b>.022</b> | <b>2.81e-04</b> | <b>1.68e-02</b> |
| Melbourne_Subcortex_Atlas_LH_CAU-VA.nii.gz          | -1.59        | -1.01e-02        | -2.26e-02        | 2.33e-03         | .153        | 1.19e-04        | 1.09e-02        |
| <b>Melbourne_Subcortex_Atlas_LH_CAU.nii.gz</b>      | <b>-2.45</b> | <b>-1.59e-02</b> | <b>-2.86e-02</b> | <b>-3.20e-03</b> | <b>.022</b> | <b>2.82e-04</b> | <b>1.68e-02</b> |
| Melbourne_Subcortex_Atlas_LH_GP.nii.gz              | 0.28         | 1.87e-03         | -1.13e-02        | 1.51e-02         | .859        | 3.63e-06        | 1.90e-03        |
| Melbourne_Subcortex_Atlas_LH_HIP-body.nii.gz        | -0.37        | -2.32e-03        | -1.45e-02        | 9.85e-03         | .779        | 6.55e-06        | 2.56e-03        |
| Melbourne_Subcortex_Atlas_LH_HIP-head-l.nii.gz      | 0.61         | 3.87e-03         | -8.58e-03        | 1.63e-02         | .597        | 1.74e-05        | 4.17e-03        |
| Melbourne_Subcortex_Atlas_LH_HIP-head-m.nii.gz      | -0.47        | -2.91e-03        | -1.51e-02        | 9.28e-03         | .704        | 1.02e-05        | 3.20e-03        |
| Melbourne_Subcortex_Atlas_LH_HIP-head-m1.nii.gz     | -0.28        | -1.77e-03        | -1.39e-02        | 1.04e-02         | .854        | 3.79e-06        | 1.95e-03        |
| Melbourne_Subcortex_Atlas_LH_HIP-head-m2.nii.gz     | -0.18        | -1.15e-03        | -1.38e-02        | 1.15e-02         | .957        | 1.49e-06        | 1.22e-03        |
| Melbourne_Subcortex_Atlas_LH_HIP-tail.nii.gz        | -1.39        | -8.66e-03        | -2.09e-02        | 3.57e-03         | .227        | 9.02e-05        | 9.50e-03        |
| Melbourne_Subcortex_Atlas_LH_HIP.nii.gz             | -0.38        | -2.36e-03        | -1.44e-02        | 9.66e-03         | .963        | 6.94e-06        | 2.63e-03        |
| Melbourne_Subcortex_Atlas_LH_IAMY.nii.gz            | 0.57         | 3.71e-03         | -9.02e-03        | 1.64e-02         | .625        | 1.53e-05        | 3.91e-03        |
| Melbourne_Subcortex_Atlas_LH_mAMY.nii.gz            | 1.33         | 8.33e-03         | -3.91e-03        | 2.06e-02         | .251        | 8.33e-05        | 9.13e-03        |
| Melbourne_Subcortex_Atlas_LH_NAc-core.nii.gz        | -1.65        | -1.07e-02        | -2.34e-02        | 2.02e-03         | .121        | 1.27e-04        | 1.13e-02        |
| Melbourne_Subcortex_Atlas_LH_NAc-shell.nii.gz       | 0.41         | 2.62e-03         | -9.92e-03        | 1.52e-02         | .917        | 7.84e-06        | 2.80e-03        |
| Melbourne_Subcortex_Atlas_LH_NAc.nii.gz             | -0.69        | -4.45e-03        | -1.71e-02        | 8.19e-03         | .599        | 2.23e-05        | 4.72e-03        |

**Table S15**

***ET\_PRS Lead\_DBS Extended Associations with grey matter diffusion magnetic resonance imaging (dMRI) – Fractional Anisotropy (FA)***

| Tract                                           | <i>t</i>     | $\beta$          | CI_low           | CI_up            | <i>p</i>    | Eta2            | Cohens_f        |
|-------------------------------------------------|--------------|------------------|------------------|------------------|-------------|-----------------|-----------------|
| <b>Melbourne_Subcortex_Atlas_LH_pCAU.nii.gz</b> | <b>-2.67</b> | <b>-1.76e-02</b> | <b>-3.06e-02</b> | <b>-4.69e-03</b> | <b>.012</b> | <b>3.34e-04</b> | <b>1.83e-02</b> |
| Melbourne_Subcortex_Atlas_LH_pGP.nii.gz         | 0.49         | 3.27e-03         | -9.89e-03        | 1.64e-02         | .689        | 1.11e-05        | 3.33e-03        |
| Melbourne_Subcortex_Atlas_LH_pHIP.nii.gz        | -0.74        | -4.58e-03        | -1.66e-02        | 7.48e-03         | .558        | 2.59e-05        | 5.09e-03        |
| Melbourne_Subcortex_Atlas_LH_pPUT.nii.gz        | 0.35         | 2.28e-03         | -1.07e-02        | 1.52e-02         | .864        | 5.58e-06        | 2.36e-03        |
| Melbourne_Subcortex_Atlas_LH_pTHA.nii.gz        | -0.90        | -6.02e-03        | -1.91e-02        | 7.11e-03         | .451        | 3.78e-05        | 6.15e-03        |
| Melbourne_Subcortex_Atlas_LH_PUT-DA.nii.gz      | 0.08         | 5.26e-04         | -1.20e-02        | 1.30e-02         | 1.00        | 3.20e-07        | 5.65e-04        |
| Melbourne_Subcortex_Atlas_LH_PUT-DP.nii.gz      | 0.27         | 1.77e-03         | -1.10e-02        | 1.45e-02         | .864        | 3.46e-06        | 1.86e-03        |
| Melbourne_Subcortex_Atlas_LH_PUT-VA.nii.gz      | -0.54        | -3.47e-03        | -1.60e-02        | 9.05e-03         | .718        | 1.38e-05        | 3.72e-03        |
| Melbourne_Subcortex_Atlas_LH_PUT-VP.nii.gz      | 0.37         | 2.47e-03         | -1.06e-02        | 1.55e-02         | .783        | 6.41e-06        | 2.53e-03        |
| Melbourne_Subcortex_Atlas_LH_PUT.nii.gz         | 0.16         | 1.01e-03         | -1.16e-02        | 1.36e-02         | .963        | 1.14e-06        | 1.07e-03        |
| Melbourne_Subcortex_Atlas_LH_THA-DA.nii.gz      | -0.94        | -6.25e-03        | -1.92e-02        | 6.73e-03         | .422        | 4.17e-05        | 6.46e-03        |
| Melbourne_Subcortex_Atlas_LH_THA-DAI.nii.gz     | -0.51        | -3.44e-03        | -1.67e-02        | 9.78e-03         | .671        | 1.22e-05        | 3.49e-03        |
| Melbourne_Subcortex_Atlas_LH_THA-DAm.nii.gz     | -1.12        | -7.31e-03        | -2.01e-02        | 5.47e-03         | .288        | 5.89e-05        | 7.67e-03        |
| Melbourne_Subcortex_Atlas_LH_THA-DP.nii.gz      | -0.36        | -2.39e-03        | -1.55e-02        | 1.07e-02         | .909        | 6.04e-06        | 2.46e-03        |
| Melbourne_Subcortex_Atlas_LH_THA-VA.nii.gz      | -0.87        | -5.54e-03        | -1.80e-02        | 6.91e-03         | .422        | 3.56e-05        | 5.97e-03        |
| Melbourne_Subcortex_Atlas_LH_THA-VAi.nii.gz     | -0.22        | -1.42e-03        | -1.40e-02        | 1.11e-02         | .907        | 2.29e-06        | 1.51e-03        |
| Melbourne_Subcortex_Atlas_LH_THA-VAia.nii.gz    | -0.15        | -9.43e-04        | -1.32e-02        | 1.14e-02         | .969        | 1.06e-06        | 1.03e-03        |
| Melbourne_Subcortex_Atlas_LH_THA-VAip.nii.gz    | -0.16        | -1.06e-03        | -1.38e-02        | 1.17e-02         | .957        | 1.25e-06        | 1.12e-03        |
| Melbourne_Subcortex_Atlas_LH_THA-VAs.nii.gz     | -1.67        | -1.06e-02        | -2.30e-02        | 1.85e-03         | .116        | 1.30e-04        | 1.14e-02        |
| Melbourne_Subcortex_Atlas_LH_THA-VP.nii.gz      | -1.19        | -7.97e-03        | -2.12e-02        | 5.21e-03         | .288        | 6.59e-05        | 8.12e-03        |
| Melbourne_Subcortex_Atlas_LH_THA-VPI.nii.gz     | -1.15        | -7.76e-03        | -2.10e-02        | 5.48e-03         | .306        | 6.18e-05        | 7.86e-03        |
| Melbourne_Subcortex_Atlas_LH_THA-VPm.nii.gz     | -0.96        | -6.45e-03        | -1.95e-02        | 6.65e-03         | .409        | 4.36e-05        | 6.60e-03        |
| Melbourne_Subcortex_Atlas_RH_aCAU.nii.gz        | -1.03        | -6.64e-03        | -1.93e-02        | 6.02e-03         | .418        | 4.95e-05        | 7.04e-03        |

**Table S15**

***ET\_PRS Lead\_DBS Extended Associations with grey matter diffusion magnetic resonance imaging (dMRI) – Fractional Anisotropy (FA)***

| Tract                                               | <i>t</i> | $\beta$   | CI_low    | CI_up     | <i>p</i> | Eta2     | Cohens_f |
|-----------------------------------------------------|----------|-----------|-----------|-----------|----------|----------|----------|
| Melbourne_Subcortex_Atlas_RH_aGP.nii.gz             | -0.23    | -1.52e-03 | -1.48e-02 | 1.17e-02  | .904     | 2.38e-06 | 1.54e-03 |
| Melbourne_Subcortex_Atlas_RH_aHIP.nii.gz            | 0.21     | 1.30e-03  | -1.09e-02 | 1.35e-02  | 1.00     | 2.06e-06 | 1.43e-03 |
| Melbourne_Subcortex_Atlas_RH_AMY.nii.gz             | 0.90     | 5.78e-03  | -6.77e-03 | 1.83e-02  | .448     | 3.81e-05 | 6.18e-03 |
| Melbourne_Subcortex_Atlas_RH_aPUT.nii.gz            | 0.58     | 3.69e-03  | -8.72e-03 | 1.61e-02  | .616     | 1.59e-05 | 3.99e-03 |
| Melbourne_Subcortex_Atlas_RH_aTHA.nii.gz            | -0.54    | -3.54e-03 | -1.65e-02 | 9.38e-03  | .651     | 1.35e-05 | 3.67e-03 |
| Melbourne_Subcortex_Atlas_RH_CAU-body.nii.gz        | -1.56    | -1.03e-02 | -2.33e-02 | 2.64e-03  | .145     | 1.14e-04 | 1.07e-02 |
| Melbourne_Subcortex_Atlas_RH_CAU-DA.nii.gz          | -1.46    | -9.51e-03 | -2.23e-02 | 3.23e-03  | .175     | 1.00e-04 | 1.00e-02 |
| Melbourne_Subcortex_Atlas_RH_CAU-tail.nii.gz        | -2.04    | -1.37e-02 | -2.70e-02 | -5.08e-04 | .058     | 1.94e-04 | 1.39e-02 |
| Melbourne_Subcortex_Atlas_RH_CAU-VA.nii.gz          | -0.38    | -2.46e-03 | -1.51e-02 | 1.02e-02  | .886     | 6.75e-06 | 2.60e-03 |
| Melbourne_Subcortex_Atlas_RH_CAU.nii.gz             | -1.43    | -9.33e-03 | -2.21e-02 | 3.45e-03  | .209     | 9.60e-05 | 9.80e-03 |
| Melbourne_Subcortex_Atlas_RH_GP.nii.gz              | -0.23    | -1.52e-03 | -1.47e-02 | 1.17e-02  | .904     | 2.38e-06 | 1.54e-03 |
| Melbourne_Subcortex_Atlas_RH_HIP-body.nii.gz        | 0.43     | 2.69e-03  | -9.43e-03 | 1.48e-02  | .738     | 8.84e-06 | 2.97e-03 |
| Melbourne_Subcortex_Atlas_RH_HIP-head-l.nii.gz      | 0.38     | 2.36e-03  | -9.96e-03 | 1.47e-02  | .829     | 6.61e-06 | 2.57e-03 |
| Melbourne_Subcortex_Atlas_RH_HIP-head-<br>m.nii.gz  | -0.13    | -8.19e-04 | -1.30e-02 | 1.14e-02  | .985     | 8.11e-07 | 9.01e-04 |
| Melbourne_Subcortex_Atlas_RH_HIP-head-<br>m1.nii.gz | 0.11     | 6.94e-04  | -1.14e-02 | 1.28e-02  | 1.00     | 5.90e-07 | 7.68e-04 |
| Melbourne_Subcortex_Atlas_RH_HIP-head-<br>m2.nii.gz | -0.44    | -2.83e-03 | -1.54e-02 | 9.72e-03  | .825     | 9.16e-06 | 3.03e-03 |
| Melbourne_Subcortex_Atlas_RH_HIP-tail.nii.gz        | -0.66    | -4.16e-03 | -1.66e-02 | 8.26e-03  | .625     | 2.02e-05 | 4.50e-03 |
| Melbourne_Subcortex_Atlas_RH_HIP.nii.gz             | 0.10     | 6.25e-04  | -1.14e-02 | 1.27e-02  | 1.00     | 4.84e-07 | 6.96e-04 |
| Melbourne_Subcortex_Atlas_RH_IAMY.nii.gz            | 0.40     | 2.63e-03  | -1.04e-02 | 1.56e-02  | .760     | 7.40e-06 | 2.72e-03 |
| Melbourne_Subcortex_Atlas_RH_mAMY.nii.gz            | 1.19     | 7.44e-03  | -4.79e-03 | 1.97e-02  | .285     | 6.66e-05 | 8.16e-03 |

**Table S15**

***ET\_PRS Lead\_DBs Extended Associations with grey matter diffusion magnetic resonance imaging (dMRI) – Fractional Anisotropy (FA)***

| Tract                                         | <i>t</i> | $\beta$   | CI_low    | CI_up    | <i>p</i> | Eta2     | Cohens_f |
|-----------------------------------------------|----------|-----------|-----------|----------|----------|----------|----------|
| Melbourne_Subcortex_Atlas_RH_NAc-core.nii.gz  | -1.04    | -6.81e-03 | -1.97e-02 | 6.07e-03 | .354     | 5.03e-05 | 7.09e-03 |
| Melbourne_Subcortex_Atlas_RH_NAc-shell.nii.gz | 0.86     | 5.49e-03  | -7.05e-03 | 1.80e-02 | .430     | 3.45e-05 | 5.87e-03 |
| Melbourne_Subcortex_Atlas_RH_NAc.nii.gz       | -0.02    | -1.05e-04 | -1.28e-02 | 1.26e-02 | 1.00     | 1.24e-08 | 1.11e-04 |
| Melbourne_Subcortex_Atlas_RH_pCAU.nii.gz      | -1.79    | -1.19e-02 | -2.49e-02 | 1.15e-03 | .090     | 1.50e-04 | 1.22e-02 |
| Melbourne_Subcortex_Atlas_RH_pGP.nii.gz       | -0.19    | -1.29e-03 | -1.45e-02 | 1.19e-02 | .933     | 1.72e-06 | 1.31e-03 |
| Melbourne_Subcortex_Atlas_RH_pHIP.nii.gz      | 0.02     | 9.76e-05  | -1.20e-02 | 1.22e-02 | 1.00     | 1.17e-08 | 1.08e-04 |
| Melbourne_Subcortex_Atlas_RH_pPUT.nii.gz      | 0.58     | 3.83e-03  | -9.12e-03 | 1.68e-02 | .618     | 1.57e-05 | 3.97e-03 |
| Melbourne_Subcortex_Atlas_RH_pTHA.nii.gz      | -0.69    | -4.63e-03 | -1.77e-02 | 8.48e-03 | .672     | 2.24e-05 | 4.73e-03 |
| Melbourne_Subcortex_Atlas_RH_PUT-DA.nii.gz    | 0.38     | 2.44e-03  | -1.01e-02 | 1.49e-02 | .818     | 6.82e-06 | 2.61e-03 |
| Melbourne_Subcortex_Atlas_RH_PUT-DP.nii.gz    | 0.63     | 4.10e-03  | -8.69e-03 | 1.69e-02 | .728     | 1.85e-05 | 4.30e-03 |
| Melbourne_Subcortex_Atlas_RH_PUT-VA.nii.gz    | 0.68     | 4.38e-03  | -8.20e-03 | 1.69e-02 | .605     | 2.18e-05 | 4.67e-03 |
| Melbourne_Subcortex_Atlas_RH_PUT-VP.nii.gz    | 0.48     | 3.22e-03  | -9.91e-03 | 1.63e-02 | .694     | 1.08e-05 | 3.29e-03 |
| Melbourne_Subcortex_Atlas_RH_PUT.nii.gz       | 0.69     | 4.48e-03  | -8.23e-03 | 1.72e-02 | .593     | 2.23e-05 | 4.73e-03 |
| Melbourne_Subcortex_Atlas_RH_THA-DA.nii.gz    | -0.93    | -6.21e-03 | -1.93e-02 | 6.85e-03 | .483     | 4.07e-05 | 6.38e-03 |
| Melbourne_Subcortex_Atlas_RH_THA-DAI.nii.gz   | -0.35    | -2.36e-03 | -1.56e-02 | 1.09e-02 | .800     | 5.71e-06 | 2.39e-03 |
| Melbourne_Subcortex_Atlas_RH_THA-DAm.nii.gz   | -1.28    | -8.38e-03 | -2.12e-02 | 4.40e-03 | .273     | 7.73e-05 | 8.79e-03 |
| Melbourne_Subcortex_Atlas_RH_THA-DP.nii.gz    | -0.53    | -3.54e-03 | -1.66e-02 | 9.51e-03 | .654     | 1.33e-05 | 3.64e-03 |
| Melbourne_Subcortex_Atlas_RH_THA-VA.nii.gz    | -0.23    | -1.48e-03 | -1.44e-02 | 1.14e-02 | .904     | 2.37e-06 | 1.54e-03 |
| Melbourne_Subcortex_Atlas_RH_THA-VAi.nii.gz   | 0.18     | 1.17e-03  | -1.17e-02 | 1.41e-02 | .946     | 1.47e-06 | 1.21e-03 |
| Melbourne_Subcortex_Atlas_RH_THA-VAia.nii.gz  | 0.91     | 5.96e-03  | -6.87e-03 | 1.88e-02 | .399     | 3.89e-05 | 6.23e-03 |
| Melbourne_Subcortex_Atlas_RH_THA-VAip.nii.gz  | -0.46    | -3.01e-03 | -1.60e-02 | 9.96e-03 | .714     | 9.70e-06 | 3.11e-03 |
| Melbourne_Subcortex_Atlas_RH_THA-VAs.nii.gz   | -0.76    | -5.01e-03 | -1.79e-02 | 7.88e-03 | .490     | 2.72e-05 | 5.22e-03 |
| Melbourne_Subcortex_Atlas_RH_THA-VP.nii.gz    | -0.60    | -4.08e-03 | -1.73e-02 | 9.14e-03 | .600     | 1.71e-05 | 4.14e-03 |

Table S15

*ET\_PRS Lead\_DBS Extended Associations with grey matter diffusion magnetic resonance imaging (dMRI) – Fractional Anisotropy (FA)*

| Tract                                                   | <i>t</i>     | $\beta$          | CI_low           | CI_up            | <i>p</i>    | Eta2            | Cohens_f        |
|---------------------------------------------------------|--------------|------------------|------------------|------------------|-------------|-----------------|-----------------|
| Melbourne_Subcortex_Atlas_RH_THA-VPl.nii.gz             | 0.13         | 8.53e-04         | -1.24e-02        | 1.41e-02         | .990        | 7.41e-07        | 8.61e-04        |
| Melbourne_Subcortex_Atlas_RH_THA-VPm.nii.gz             | -1.44        | -9.67e-03        | -2.28e-02        | 3.45e-03         | .234        | 9.77e-05        | 9.88e-03        |
| MNI_PD25_subcortical_LH_amygdala.nii.gz                 | 0.90         | 5.80e-03         | -6.83e-03        | 1.84e-02         | .405        | 3.79e-05        | 6.16e-03        |
| <b>MNI_PD25_subcortical_LH_caudate.nii.gz</b>           | <b>-2.34</b> | <b>-1.52e-02</b> | <b>-2.79e-02</b> | <b>-2.46e-03</b> | <b>.030</b> | <b>2.56e-04</b> | <b>1.60e-02</b> |
| MNI_PD25_subcortical_LH_globus_pallidus_exterus.nii.gz  | 0.23         | 1.50e-03         | -1.15e-02        | 1.45e-02         | .903        | 2.40e-06        | 1.55e-03        |
| MNI_PD25_subcortical_LH_globus_pallidus_internus.nii.gz | 0.34         | 2.30e-03         | -1.09e-02        | 1.54e-02         | .860        | 5.49e-06        | 2.34e-03        |
| MNI_PD25_subcortical_LH_hippocampus.nii.gz              | -0.71        | -4.39e-03        | -1.66e-02        | 7.78e-03         | .659        | 2.34e-05        | 4.84e-03        |
| MNI_PD25_subcortical_LH_nucleus_accumbens.nii.gz        | 0.59         | 3.78e-03         | -8.69e-03        | 1.62e-02         | .676        | 1.65e-05        | 4.06e-03        |
| MNI_PD25_subcortical_LH_putamen.nii.gz                  | 0.44         | 2.84e-03         | -9.81e-03        | 1.55e-02         | .875        | 9.05e-06        | 3.01e-03        |
| <b>MNI_PD25_subcortical_LH_red_nucleus.nii.gz</b>       | <b>3.28</b>  | <b>2.21e-02</b>  | <b>8.87e-03</b>  | <b>3.52e-02</b>  | <b>.003</b> | <b>5.03e-04</b> | <b>2.24e-02</b> |
| MNI_PD25_subcortical_LH_substantia_nigra.nii.gz         | -0.77        | -5.25e-03        | -1.85e-02        | 8.05e-03         | .604        | 2.80e-05        | 5.29e-03        |
| MNI_PD25_subcortical_LH_subthalamic_nucleus.nii.gz      | 0.83         | 5.59e-03         | -7.67e-03        | 1.89e-02         | .642        | 3.20e-05        | 5.66e-03        |
| MNI_PD25_subcortical_LH_thalamus.nii.gz                 | -0.72        | -4.79e-03        | -1.78e-02        | 8.26e-03         | .577        | 2.42e-05        | 4.92e-03        |
| MNI_PD25_subcortical_RH_amygdala.nii.gz                 | 0.89         | 5.70e-03         | -6.91e-03        | 1.83e-02         | .459        | 3.67e-05        | 6.06e-03        |
| MNI_PD25_subcortical_RH_caudate.nii.gz                  | -1.69        | -1.10e-02        | -2.37e-02        | 1.77e-03         | .144        | 1.33e-04        | 1.16e-02        |
| MNI_PD25_subcortical_RH_globus_pallidus_exterus.nii.gz  | 0.06         | 4.34e-04         | -1.27e-02        | 1.36e-02         | 1.00        | 1.96e-07        | 4.43e-04        |
| MNI_PD25_subcortical_RH_globus_pallidus_Internus.nii.gz | -0.92        | -6.18e-03        | -1.94e-02        | 7.02e-03         | .438        | 3.95e-05        | 6.28e-03        |

Table S15

*ET\_PRS Lead\_DBS Extended Associations with grey matter diffusion magnetic resonance imaging (dMRI) – Fractional Anisotropy (FA)*

| Tract                                              | <i>t</i>     | $\beta$          | CI_low           | CI_up            | <i>p</i>    | Eta2            | Cohens_f        |
|----------------------------------------------------|--------------|------------------|------------------|------------------|-------------|-----------------|-----------------|
| MNI_PD25_subcortical_RH_hippocampus.nii.gz         | -0.34        | -2.10e-03        | -1.42e-02        | 9.98e-03         | .806        | 5.45e-06        | 2.33e-03        |
| MNI_PD25_subcortical_RH_nucleus_accumbens.nii.gz   | 0.83         | 5.23e-03         | -7.14e-03        | 1.76e-02         | .448        | 3.22e-05        | 5.67e-03        |
| MNI_PD25_subcortical_RH_putamen.nii.gz             | 0.81         | 5.15e-03         | -7.39e-03        | 1.77e-02         | .579        | 3.04e-05        | 5.51e-03        |
| <b>MNI_PD25_subcortical_RH_red_nucleus.nii.gz</b>  | <b>3.33</b>  | <b>2.23e-02</b>  | <b>9.17e-03</b>  | <b>3.55e-02</b>  | <b>.002</b> | <b>5.18e-04</b> | <b>2.28e-02</b> |
| MNI_PD25_subcortical_RH_substantia_nigra.nii.gz    | -0.16        | -1.07e-03        | -1.42e-02        | 1.21e-02         | .961        | 1.18e-06        | 1.09e-03        |
| MNI_PD25_subcortical_RH_subthalamic_nucleus.nii.gz | -0.19        | -1.29e-03        | -1.45e-02        | 1.19e-02         | .933        | 1.71e-06        | 1.31e-03        |
| MNI_PD25_subcortical_RH_thalamus.nii.gz            | -0.58        | -3.90e-03        | -1.70e-02        | 9.19e-03         | .616        | 1.59e-05        | 3.99e-03        |
| Thalamic_DBS_Connectivity_atlas_LH_Dentate.nii.gz  | -0.15        | -9.98e-04        | -1.42e-02        | 1.22e-02         | .970        | 1.04e-06        | 1.02e-03        |
| Thalamic_DBS_Connectivity_atlas_RH_Dentate.nii.gz  | 0.50         | 3.35e-03         | -9.81e-03        | 1.65e-02         | .680        | 1.16e-05        | 3.41e-03        |
| <b>Thomas_Atlas_LH_AV.nii.gz</b>                   | <b>-2.56</b> | <b>-1.55e-02</b> | <b>-2.74e-02</b> | <b>-3.64e-03</b> | <b>.013</b> | <b>3.07e-04</b> | <b>1.75e-02</b> |
| Thomas_Atlas_LH_CM.nii.gz                          | -1.02        | -6.81e-03        | -1.99e-02        | 6.32e-03         | .486        | 4.84e-05        | 6.96e-03        |
| Thomas_Atlas_LH_Hb.nii.gz                          | -0.67        | -4.50e-03        | -1.76e-02        | 8.62e-03         | .552        | 2.11e-05        | 4.60e-03        |
| Thomas_Atlas_LH_LGN.nii.gz                         | 0.23         | 1.55e-03         | -1.17e-02        | 1.48e-02         | .901        | 2.44e-06        | 1.56e-03        |
| Thomas_Atlas_LH_MD-Pf.nii.gz                       | -0.52        | -3.45e-03        | -1.65e-02        | 9.63e-03         | .665        | 1.26e-05        | 3.54e-03        |
| Thomas_Atlas_LH_MGN.nii.gz                         | -0.37        | -2.48e-03        | -1.57e-02        | 1.07e-02         | .861        | 6.41e-06        | 2.53e-03        |
| Thomas_Atlas_LH_MTT.nii.gz                         | 0.64         | 4.31e-03         | -8.82e-03        | 1.74e-02         | .817        | 1.94e-05        | 4.40e-03        |
| Thomas_Atlas_LH_Pul.nii.gz                         | -0.17        | -1.11e-03        | -1.43e-02        | 1.20e-02         | .955        | 1.29e-06        | 1.14e-03        |
| Thomas_Atlas_LH_THALAMUS.nii.gz                    | -0.59        | -3.93e-03        | -1.70e-02        | 9.13e-03         | .610        | 1.63e-05        | 4.04e-03        |
| Thomas_Atlas_LH_VA.nii.gz                          | -0.19        | -1.29e-03        | -1.45e-02        | 1.19e-02         | .932        | 1.73e-06        | 1.32e-03        |

**Table S15**

***ET\_PRS Lead\_DBS Extended Associations with grey matter diffusion magnetic resonance imaging (dMRI) – Fractional Anisotropy (FA)***

| Tract                           | <i>t</i> | $\beta$   | CI_low    | CI_up    | <i>p</i> | Eta2     | Cohens_f |
|---------------------------------|----------|-----------|-----------|----------|----------|----------|----------|
| Thomas_Atlas_LH_VLa.nii.gz      | 0.28     | 1.84e-03  | -1.13e-02 | 1.50e-02 | .862     | 3.54e-06 | 1.88e-03 |
| Thomas_Atlas_LH_VLP.nii.gz      | -0.47    | -3.15e-03 | -1.63e-02 | 1.00e-02 | .704     | 1.03e-05 | 3.20e-03 |
| Thomas_Atlas_LH_VLPd.nii.gz     | -0.23    | -1.58e-03 | -1.48e-02 | 1.17e-02 | .897     | 2.56e-06 | 1.60e-03 |
| Thomas_Atlas_LH_VLPv.nii.gz     | -0.78    | -5.20e-03 | -1.83e-02 | 7.90e-03 | .533     | 2.84e-05 | 5.33e-03 |
| Thomas_Atlas_LH_VPL.nii.gz      | -1.03    | -6.97e-03 | -2.02e-02 | 6.24e-03 | .331     | 5.01e-05 | 7.08e-03 |
| Thomas_Atlas_RH_AV.nii.gz       | -1.69    | -1.04e-02 | -2.25e-02 | 1.69e-03 | .112     | 1.33e-04 | 1.15e-02 |
| Thomas_Atlas_RH_CM.nii.gz       | -1.12    | -7.52e-03 | -2.06e-02 | 5.59e-03 | .359     | 5.92e-05 | 7.69e-03 |
| Thomas_Atlas_RH_Hb.nii.gz       | -0.83    | -5.57e-03 | -1.87e-02 | 7.51e-03 | .555     | 3.26e-05 | 5.71e-03 |
| Thomas_Atlas_RH_LGN.nii.gz      | 0.34     | 2.33e-03  | -1.09e-02 | 1.56e-02 | .832     | 5.55e-06 | 2.36e-03 |
| Thomas_Atlas_RH_MD-Pf.nii.gz    | -1.05    | -6.95e-03 | -2.00e-02 | 6.08e-03 | .325     | 5.12e-05 | 7.15e-03 |
| Thomas_Atlas_RH_MGN.nii.gz      | -1.52    | -1.03e-02 | -2.36e-02 | 2.98e-03 | .235     | 1.08e-04 | 1.04e-02 |
| Thomas_Atlas_RH_MTT.nii.gz      | 1.40     | 9.33e-03  | -3.74e-03 | 2.24e-02 | .356     | 9.17e-05 | 9.57e-03 |
| Thomas_Atlas_RH_Pul.nii.gz      | -0.98    | -6.53e-03 | -1.96e-02 | 6.56e-03 | .361     | 4.48e-05 | 6.69e-03 |
| Thomas_Atlas_RH_THALAMUS.nii.gz | -0.52    | -3.49e-03 | -1.66e-02 | 9.60e-03 | .661     | 1.28e-05 | 3.58e-03 |
| Thomas_Atlas_RH_VA.nii.gz       | 0.57     | 3.82e-03  | -9.32e-03 | 1.70e-02 | .695     | 1.52e-05 | 3.90e-03 |
| Thomas_Atlas_RH_VLa.nii.gz      | 0.86     | 5.75e-03  | -7.41e-03 | 1.89e-02 | .431     | 3.43e-05 | 5.86e-03 |
| Thomas_Atlas_RH_VLP.nii.gz      | 0.03     | 1.76e-04  | -1.30e-02 | 1.33e-02 | 1.00     | 3.21e-08 | 1.79e-04 |
| Thomas_Atlas_RH_VLPd.nii.gz     | 0.22     | 1.51e-03  | -1.17e-02 | 1.47e-02 | .905     | 2.34e-06 | 1.53e-03 |
| Thomas_Atlas_RH_VLPv.nii.gz     | -0.27    | -1.79e-03 | -1.49e-02 | 1.14e-02 | .965     | 3.33e-06 | 1.82e-03 |
| Thomas_Atlas_RH_VPL.nii.gz      | -0.23    | -1.54e-03 | -1.49e-02 | 1.18e-02 | .902     | 2.42e-06 | 1.55e-03 |

*Note*

\* *p* < .05, \*\* *p* < .01, \*\*\* *p* < .001, 95% CI(B)



**Table S16**

***ET\_PRS Lead\_DBs Extended Associations with grey matter diffusion magnetic resonance imaging (dMRI) – Radial Diffusivity (RD)***

| Tract                                                        | <i>t</i> | $\beta$   | CI_low    | CI_up    | <i>p</i> | Eta2     | Cohens_f |
|--------------------------------------------------------------|----------|-----------|-----------|----------|----------|----------|----------|
| AHEAD_Atlas_GPe_L.nii.gz                                     | 0.40     | 6.32e-05  | -2.47e-04 | 3.73e-04 | .941     | 7.47e-06 | 2.73e-03 |
| AHEAD_Atlas_GPe_R_mask.nii.gz                                | -0.09    | -1.43e-05 | -3.30e-04 | 3.01e-04 | 1.00     | 3.69e-07 | 6.08e-04 |
| AHEAD_Atlas_GPi_L_mask.nii.gz                                | -0.31    | -5.82e-05 | -4.21e-04 | 3.05e-04 | .912     | 4.62e-06 | 2.15e-03 |
| AHEAD_Atlas_GPi_R_mask.nii.gz                                | 0.03     | 6.05e-06  | -3.59e-04 | 3.71e-04 | 1.00     | 4.95e-08 | 2.22e-04 |
| AHEAD_Atlas_RN_L_mask.nii.gz                                 | -1.65    | -3.46e-04 | -7.59e-04 | 6.63e-05 | .157     | 1.27e-04 | 1.13e-02 |
| AHEAD_Atlas_RN_R_mask.nii.gz                                 | -1.29    | -2.79e-04 | -7.03e-04 | 1.46e-04 | .311     | 7.77e-05 | 8.82e-03 |
| AHEAD_Atlas_SN_L_mask.nii.gz                                 | -0.53    | -1.17e-04 | -5.49e-04 | 3.15e-04 | .842     | 1.32e-05 | 3.64e-03 |
| AHEAD_Atlas_SN_R_mask.nii.gz                                 | -1.16    | -2.41e-04 | -6.49e-04 | 1.66e-04 | .339     | 6.31e-05 | 7.95e-03 |
| AHEAD_Atlas_STN_L_mask.nii.gz                                | -1.19    | -3.06e-04 | -8.09e-04 | 1.98e-04 | .368     | 6.64e-05 | 8.15e-03 |
| AHEAD_Atlas_STN_R_mask.nii.gz                                | -0.78    | -2.10e-04 | -7.41e-04 | 3.21e-04 | .482     | 2.82e-05 | 5.31e-03 |
| Atlas_Basal_Ganglia_and_Thalamus_all_histo_label<br>s.nii.gz | 0.91     | 1.34e-04  | -1.55e-04 | 4.22e-04 | .401     | 3.85e-05 | 6.21e-03 |
| Atlas_Basal_Ganglia_and_Thalamus_L_Acc.nii.gz                | -0.21    | -3.94e-05 | -4.14e-04 | 3.35e-04 | .920     | 1.99e-06 | 1.41e-03 |
| Atlas_Basal_Ganglia_and_Thalamus_L_Cau-<br>ia.nii.gz         | 0.73     | 1.50e-04  | -2.54e-04 | 5.53e-04 | .514     | 2.48e-05 | 4.98e-03 |
| Atlas_Basal_Ganglia_and_Thalamus_L_Cau-<br>im.nii.gz         | 0.88     | 2.41e-04  | -2.94e-04 | 7.75e-04 | .415     | 3.65e-05 | 6.04e-03 |
| Atlas_Basal_Ganglia_and_Thalamus_L_Cau-<br>sa.nii.gz         | 1.37     | 4.99e-04  | -2.16e-04 | 1.21e-03 | .188     | 8.78e-05 | 9.37e-03 |
| Atlas_Basal_Ganglia_and_Thalamus_L_Cau-<br>sp.nii.gz         | 1.66     | 5.38e-04  | -9.79e-05 | 1.17e-03 | .119     | 1.29e-04 | 1.14e-02 |
| Atlas_Basal_Ganglia_and_Thalamus_L_GPe.nii.gz                | -0.30    | -5.31e-05 | -3.98e-04 | 2.91e-04 | .907     | 4.28e-06 | 2.07e-03 |
| Atlas_Basal_Ganglia_and_Thalamus_L_GPi.nii.gz                | -0.62    | -1.05e-04 | -4.39e-04 | 2.29e-04 | .740     | 1.78e-05 | 4.21e-03 |

**Table S16**

***ET\_PRS Lead\_DBS Extended Associations with grey matter diffusion magnetic resonance imaging (dMRI) – Radial Diffusivity (RD)***

| Tract                                                   | <i>t</i>    | $\beta$         | CI_low          | CI_up           | <i>p</i>    | Eta2            | Cohens_f        |
|---------------------------------------------------------|-------------|-----------------|-----------------|-----------------|-------------|-----------------|-----------------|
| Atlas_Basal_Ganglia_and_Thalamus_L_Put-ia.nii.gz        | 0.18        | 2.90e-05        | -2.82e-04       | 3.40e-04        | .950        | 1.57e-06        | 1.25e-03        |
| Atlas_Basal_Ganglia_and_Thalamus_L_Put-im.nii.gz        | -0.17       | -2.42e-05       | -3.12e-04       | 2.63e-04        | .956        | 1.28e-06        | 1.13e-03        |
| Atlas_Basal_Ganglia_and_Thalamus_L_Put-sa.nii.gz        | 1.00        | 1.46e-04        | -1.40e-04       | 4.31e-04        | .387        | 4.70e-05        | 6.86e-03        |
| Atlas_Basal_Ganglia_and_Thalamus_L_Put-sm.nii.gz        | 1.00        | 1.40e-04        | -1.34e-04       | 4.14e-04        | .436        | 4.69e-05        | 6.85e-03        |
| Atlas_Basal_Ganglia_and_Thalamus_L_Put-sp.nii.gz        | <0.01       | 7.30e-07        | -2.99e-04       | 3.01e-04        | 1.00        | 1.07e-09        | 3.27e-05        |
| Atlas_Basal_Ganglia_and_Thalamus_L_SN.nii.gz            | -0.67       | -1.53e-04       | -6.03e-04       | 2.96e-04        | .626        | 2.10e-05        | 4.58e-03        |
| Atlas_Basal_Ganglia_and_Thalamus_L_STN.nii.gz           | -1.11       | -2.72e-04       | -7.54e-04       | 2.10e-04        | .422        | 5.74e-05        | 7.57e-03        |
| Atlas_Basal_Ganglia_and_Thalamus_L_Tha-a.nii.gz         | 1.18        | 2.37e-04        | -1.58e-04       | 6.32e-04        | .293        | 6.48e-05        | 8.05e-03        |
| <b>Atlas_Basal_Ganglia_and_Thalamus_L_Tha-ld.nii.gz</b> | <b>2.18</b> | <b>3.71e-04</b> | <b>3.72e-05</b> | <b>7.05e-04</b> | <b>.040</b> | <b>2.22e-04</b> | <b>1.49e-02</b> |
| Atlas_Basal_Ganglia_and_Thalamus_L_Tha-lp.nii.gz        | 1.95        | 3.12e-04        | -1.03e-06       | 6.26e-04        | .062        | 1.79e-04        | 1.34e-02        |
| Atlas_Basal_Ganglia_and_Thalamus_L_Tha-lpu.nii.gz       | -0.15       | -2.52e-05       | -3.51e-04       | 3.00e-04        | .967        | 1.08e-06        | 1.04e-03        |
| <b>Atlas_Basal_Ganglia_and_Thalamus_L_Tha-md.nii.gz</b> | <b>2.12</b> | <b>5.79e-04</b> | <b>4.37e-05</b> | <b>1.11e-03</b> | <b>.047</b> | <b>2.11e-04</b> | <b>1.45e-02</b> |
| Atlas_Basal_Ganglia_and_Thalamus_L_Tha-mpu.nii.gz       | 1.70        | 3.80e-04        | -5.86e-05       | 8.19e-04        | .109        | 1.35e-04        | 1.16e-02        |
| Atlas_Basal_Ganglia_and_Thalamus_L_Tha-vp.nii.gz        | 1.05        | 1.45e-04        | -1.26e-04       | 4.15e-04        | .405        | 5.16e-05        | 7.18e-03        |
| Atlas_Basal_Ganglia_and_Thalamus_R_Acc.nii.gz           | -0.74       | -1.44e-04       | -5.29e-04       | 2.40e-04        | .564        | 2.54e-05        | 5.04e-03        |

**Table S16**

***ET\_PRS Lead\_DBs Extended Associations with grey matter diffusion magnetic resonance imaging (dMRI) – Radial Diffusivity (RD)***

| Tract                                                | <i>t</i> | $\beta$   | CI_low    | CI_up    | <i>p</i> | Eta2     | Cohens_f |
|------------------------------------------------------|----------|-----------|-----------|----------|----------|----------|----------|
| Atlas_Basal_Ganglia_and_Thalamus_R_Cau-<br>ia.nii.gz | -0.10    | -2.30e-05 | -4.83e-04 | 4.37e-04 | 1.00     | 4.50e-07 | 6.71e-04 |
| Atlas_Basal_Ganglia_and_Thalamus_R_Cau-<br>im.nii.gz | 0.45     | 1.20e-04  | -4.05e-04 | 6.45e-04 | .720     | 9.40e-06 | 3.07e-03 |
| Atlas_Basal_Ganglia_and_Thalamus_R_Cau-<br>sa.nii.gz | 0.61     | 2.04e-04  | -4.49e-04 | 8.58e-04 | .594     | 1.76e-05 | 4.19e-03 |
| Atlas_Basal_Ganglia_and_Thalamus_R_Cau-<br>sp.nii.gz | 1.33     | 4.03e-04  | -1.91e-04 | 9.98e-04 | .202     | 8.29e-05 | 9.10e-03 |
| Atlas_Basal_Ganglia_and_Thalamus_R_GPe.nii.gz        | 0.24     | 4.16e-05  | -3.00e-04 | 3.84e-04 | .893     | 2.66e-06 | 1.63e-03 |
| Atlas_Basal_Ganglia_and_Thalamus_R_GPi.nii.gz        | -0.35    | -5.99e-05 | -3.97e-04 | 2.77e-04 | .800     | 5.70e-06 | 2.39e-03 |
| Atlas_Basal_Ganglia_and_Thalamus_R_Put-ia.nii.gz     | -0.60    | -9.70e-05 | -4.14e-04 | 2.20e-04 | .603     | 1.69e-05 | 4.11e-03 |
| Atlas_Basal_Ganglia_and_Thalamus_R_Put-<br>im.nii.gz | 0.05     | 7.20e-06  | -2.67e-04 | 2.81e-04 | 1.00     | 1.24e-07 | 3.52e-04 |
| Atlas_Basal_Ganglia_and_Thalamus_R_Put-sa.nii.gz     | 0.85     | 1.20e-04  | -1.56e-04 | 3.96e-04 | .433     | 3.41e-05 | 5.84e-03 |
| Atlas_Basal_Ganglia_and_Thalamus_R_Put-<br>sm.nii.gz | 1.10     | 1.51e-04  | -1.18e-04 | 4.19e-04 | .332     | 5.67e-05 | 7.53e-03 |
| Atlas_Basal_Ganglia_and_Thalamus_R_Put-<br>sp.nii.gz | 0.56     | 8.02e-05  | -2.01e-04 | 3.61e-04 | .767     | 1.47e-05 | 3.83e-03 |
| Atlas_Basal_Ganglia_and_Thalamus_R_SN.nii.gz         | -1.52    | -3.55e-04 | -8.12e-04 | 1.02e-04 | .200     | 1.09e-04 | 1.04e-02 |
| Atlas_Basal_Ganglia_and_Thalamus_R_STN.nii.gz        | -0.87    | -2.31e-04 | -7.51e-04 | 2.89e-04 | .469     | 3.56e-05 | 5.96e-03 |
| Atlas_Basal_Ganglia_and_Thalamus_R_Tha-a.nii.gz      | 0.39     | 6.77e-05  | -2.75e-04 | 4.11e-04 | .769     | 7.02e-06 | 2.65e-03 |
| Atlas_Basal_Ganglia_and_Thalamus_R_Tha-<br>ld.nii.gz | 1.57     | 2.63e-04  | -6.58e-05 | 5.91e-04 | .129     | 1.15e-04 | 1.07e-02 |

Table S16

*ET\_PRS Lead\_DBs Extended Associations with grey matter diffusion magnetic resonance imaging (dMRI) – Radial Diffusivity (RD)*

| Tract                                                 | <i>t</i>    | $\beta$         | CI_low          | CI_up           | <i>p</i>    | Eta2            | Cohens_f        |
|-------------------------------------------------------|-------------|-----------------|-----------------|-----------------|-------------|-----------------|-----------------|
| Atlas_Basal_Ganglia_and_Thalamus_R_Tha-<br>lp.nii.gz  | 1.66        | 2.12e-04        | -3.76e-05       | 4.62e-04        | .132        | 1.30e-04        | 1.14e-02        |
| Atlas_Basal_Ganglia_and_Thalamus_R_Tha-<br>lpu.nii.gz | 1.08        | 1.92e-04        | -1.55e-04       | 5.39e-04        | .307        | 5.50e-05        | 7.42e-03        |
| Atlas_Basal_Ganglia_and_Thalamus_R_Tha-<br>md.nii.gz  | 1.10        | 1.94e-04        | -1.52e-04       | 5.40e-04        | .331        | 5.68e-05        | 7.54e-03        |
| Atlas_Basal_Ganglia_and_Thalamus_R_Tha-<br>mpu.nii.gz | 1.68        | 4.14e-04        | -6.80e-05       | 8.96e-04        | .113        | 1.33e-04        | 1.15e-02        |
| Atlas_Basal_Ganglia_and_Thalamus_R_Tha-<br>vp.nii.gz  | 0.34        | 4.78e-05        | -2.25e-04       | 3.20e-04        | .804        | 5.54e-06        | 2.35e-03        |
| DISTAL_L_1.nii.gz                                     | 1.07        | 1.70e-04        | -1.41e-04       | 4.81e-04        | .313        | 5.36e-05        | 7.32e-03        |
| DISTAL_L_100.nii.gz                                   | 1.73        | 3.44e-04        | -4.67e-05       | 7.36e-04        | .103        | 1.40e-04        | 1.18e-02        |
| <b>DISTAL_L_101.nii.gz</b>                            | <b>2.29</b> | <b>4.74e-04</b> | <b>6.76e-05</b> | <b>8.80e-04</b> | <b>.031</b> | <b>2.45e-04</b> | <b>1.57e-02</b> |
| DISTAL_L_105.nii.gz                                   | 1.45        | 3.46e-04        | -1.22e-04       | 8.15e-04        | .224        | 9.83e-05        | 9.91e-03        |
| DISTAL_L_106.nii.gz                                   | 0.91        | 1.97e-04        | -2.29e-04       | 6.24e-04        | .401        | 3.85e-05        | 6.21e-03        |
| DISTAL_L_107.nii.gz                                   | 0.03        | 5.01e-06        | -3.17e-04       | 3.27e-04        | 1.00        | 4.36e-08        | 2.09e-04        |
| DISTAL_L_108.nii.gz                                   | 0.36        | 7.67e-05        | -3.43e-04       | 4.96e-04        | .792        | 6.02e-06        | 2.45e-03        |
| DISTAL_L_109.nii.gz                                   | 1.63        | 5.97e-04        | -1.20e-04       | 1.31e-03        | .226        | 1.25e-04        | 1.12e-02        |
| DISTAL_L_110.nii.gz                                   | -0.15       | -1.80e-05       | -2.58e-04       | 2.22e-04        | .971        | 1.02e-06        | 1.01e-03        |
| DISTAL_L_111.nii.gz                                   | 1.35        | 2.47e-04        | -1.11e-04       | 6.05e-04        | .216        | 8.55e-05        | 9.25e-03        |
| DISTAL_L_112.nii.gz                                   | 0.79        | 1.10e-04        | -1.65e-04       | 3.85e-04        | .475        | 2.89e-05        | 5.38e-03        |
| DISTAL_L_118.nii.gz                                   | 0.57        | 9.22e-05        | -2.27e-04       | 4.11e-04        | .628        | 1.51e-05        | 3.88e-03        |
| DISTAL_L_14.nii.gz                                    | -0.86       | -1.40e-04       | -4.60e-04       | 1.80e-04        | .537        | 3.46e-05        | 5.88e-03        |

Table S16

*ET\_PRS Lead\_DBs Extended Associations with grey matter diffusion magnetic resonance imaging (dMRI) – Radial Diffusivity (RD)*

| Tract                     | <i>t</i>    | $\beta$         | CI_low          | CI_up           | <i>p</i>    | Eta2            | Cohens_f        |
|---------------------------|-------------|-----------------|-----------------|-----------------|-------------|-----------------|-----------------|
| DISTAL_L_16.nii.gz        | 1.26        | 6.01e-04        | -3.35e-04       | 1.54e-03        | .272        | 7.42e-05        | 8.62e-03        |
| DISTAL_L_2.nii.gz         | 0.50        | 7.09e-05        | -2.08e-04       | 3.50e-04        | .681        | 1.16e-05        | 3.41e-03        |
| DISTAL_L_24.nii.gz        | -0.70       | -1.40e-04       | -5.35e-04       | 2.54e-04        | .668        | 2.28e-05        | 4.77e-03        |
| DISTAL_L_26.nii.gz        | 0.40        | 6.72e-05        | -2.61e-04       | 3.95e-04        | .757        | 7.57e-06        | 2.75e-03        |
| DISTAL_L_28.nii.gz        | 1.63        | 6.60e-04        | -1.36e-04       | 1.46e-03        | .114        | 1.24e-04        | 1.11e-02        |
| DISTAL_L_29.nii.gz        | 0.60        | 2.36e-04        | -5.40e-04       | 1.01e-03        | .673        | 1.67e-05        | 4.09e-03        |
| <b>DISTAL_L_35.nii.gz</b> | <b>2.28</b> | <b>1.11e-03</b> | <b>1.54e-04</b> | <b>2.07e-03</b> | <b>.031</b> | <b>2.43e-04</b> | <b>1.56e-02</b> |
| DISTAL_L_36.nii.gz        | 0.45        | 5.92e-05        | -1.96e-04       | 3.14e-04        | .714        | 9.68e-06        | 3.11e-03        |
| <b>DISTAL_L_37.nii.gz</b> | <b>2.57</b> | <b>6.72e-04</b> | <b>1.60e-04</b> | <b>1.18e-03</b> | <b>.016</b> | <b>3.10e-04</b> | <b>1.76e-02</b> |
| DISTAL_L_4.nii.gz         | 0.07        | 7.90e-06        | -2.12e-04       | 2.28e-04        | 1.00        | 2.32e-07        | 4.82e-04        |
| DISTAL_L_40.nii.gz        | -0.05       | -1.14e-05       | -4.71e-04       | 4.48e-04        | 1.00        | 1.10e-07        | 3.32e-04        |
| DISTAL_L_47.nii.gz        | -0.60       | -1.31e-04       | -5.62e-04       | 3.00e-04        | .674        | 1.66e-05        | 4.08e-03        |
| DISTAL_L_49.nii.gz        | 1.26        | 1.89e-04        | -1.04e-04       | 4.81e-04        | .284        | 7.49e-05        | 8.65e-03        |
| DISTAL_L_6.nii.gz         | -0.71       | -9.90e-05       | -3.71e-04       | 1.73e-04        | .523        | 2.39e-05        | 4.89e-03        |
| DISTAL_L_60.nii.gz        | 0.45        | 7.37e-05        | -2.48e-04       | 3.95e-04        | .991        | 9.46e-06        | 3.08e-03        |
| DISTAL_L_63.nii.gz        | -0.23       | -6.64e-05       | -6.33e-04       | 5.00e-04        | .900        | 2.47e-06        | 1.57e-03        |
| DISTAL_L_68.nii.gz        | -0.36       | -8.95e-05       | -5.74e-04       | 3.95e-04        | .877        | 6.13e-06        | 2.48e-03        |
| DISTAL_L_7.nii.gz         | 0.96        | 2.24e-04        | -2.34e-04       | 6.81e-04        | .465        | 4.30e-05        | 6.56e-03        |
| DISTAL_L_70.nii.gz        | 0.03        | 7.25e-06        | -4.20e-04       | 4.35e-04        | 1.00        | 5.17e-08        | 2.27e-04        |
| DISTAL_L_76.nii.gz        | 1.01        | 1.53e-04        | -1.43e-04       | 4.48e-04        | .342        | 4.81e-05        | 6.94e-03        |
| DISTAL_L_8.nii.gz         | -0.97       | -1.48e-04       | -4.48e-04       | 1.51e-04        | .456        | 4.41e-05        | 6.64e-03        |
| DISTAL_L_86.nii.gz        | 0.83        | 1.47e-04        | -2.02e-04       | 4.96e-04        | .641        | 3.21e-05        | 5.67e-03        |
| DISTAL_L_87.nii.gz        | 0.95        | 1.57e-04        | -1.67e-04       | 4.81e-04        | .520        | 4.24e-05        | 6.51e-03        |

Table S16

*ET\_PRS Lead\_DBs Extended Associations with grey matter diffusion magnetic resonance imaging (dMRI) – Radial Diffusivity (RD)*

| Tract                            | <i>t</i>    | $\beta$         | CI_low          | CI_up           | <i>p</i>    | Eta2            | Cohens_f        |
|----------------------------------|-------------|-----------------|-----------------|-----------------|-------------|-----------------|-----------------|
| DISTAL_L_89.nii.gz               | 0.06        | 1.10e-05        | -3.66e-04       | 3.88e-04        | 1.00        | 1.54e-07        | 3.92e-04        |
| DISTAL_L_91.nii.gz               | 1.97        | 3.02e-04        | 1.07e-06        | 6.03e-04        | .090        | 1.81e-04        | 1.35e-02        |
| DISTAL_L_92.nii.gz               | 1.74        | 2.19e-04        | -2.76e-05       | 4.66e-04        | .112        | 1.42e-04        | 1.19e-02        |
| DISTAL_L_93.nii.gz               | 1.41        | 2.10e-04        | -8.26e-05       | 5.03e-04        | .195        | 9.28e-05        | 9.63e-03        |
| DISTAL_L_94.nii.gz               | 1.12        | 1.52e-04        | -1.13e-04       | 4.18e-04        | .364        | 5.92e-05        | 7.69e-03        |
| DISTAL_L_97.nii.gz               | 2.06        | 2.83e-04        | 1.35e-05        | 5.52e-04        | .062        | 1.99e-04        | 1.41e-02        |
| <b>DISTAL_L_98.nii.gz</b>        | <b>2.61</b> | <b>3.74e-04</b> | <b>9.29e-05</b> | <b>6.56e-04</b> | <b>.020</b> | <b>3.18e-04</b> | <b>1.78e-02</b> |
| DISTAL_L_GPe.nii.gz              | -0.04       | -8.29e-06       | -3.95e-04       | 3.79e-04        | 1.00        | 8.27e-08        | 2.88e-04        |
| DISTAL_L_GPi_sensorimotor.nii.gz | -0.34       | -5.04e-05       | -3.42e-04       | 2.41e-04        | .808        | 5.39e-06        | 2.32e-03        |
| DISTAL_L_GPi.nii.gz              | -0.46       | -1.00e-04       | -5.31e-04       | 3.30e-04        | .772        | 9.78e-06        | 3.13e-03        |
| DISTAL_L_RN.nii.gz               | -1.78       | -3.78e-04       | -7.94e-04       | 3.84e-05        | .138        | 1.48e-04        | 1.22e-02        |
| DISTAL_L_STN_associative.nii.gz  | -1.35       | -3.91e-04       | -9.61e-04       | 1.79e-04        | .245        | 8.49e-05        | 9.21e-03        |
| DISTAL_L_STN_limbic.nii.gz       | -0.49       | -1.53e-04       | -7.71e-04       | 4.64e-04        | .689        | 1.11e-05        | 3.33e-03        |
| DISTAL_L_STN_motor.nii.gz        | -1.30       | -3.12e-04       | -7.84e-04       | 1.59e-04        | .356        | 7.90e-05        | 8.89e-03        |
| DISTAL_L_STN.nii.gz              | -1.36       | -3.75e-04       | -9.16e-04       | 1.66e-04        | .245        | 8.65e-05        | 9.30e-03        |
| DISTAL_R_1.nii.gz                | 0.73        | 1.25e-04        | -2.13e-04       | 4.64e-04        | .514        | 2.47e-05        | 4.97e-03        |
| DISTAL_R_100.nii.gz              | 1.97        | 3.67e-04        | 2.44e-06        | 7.32e-04        | .067        | 1.82e-04        | 1.35e-02        |
| DISTAL_R_101.nii.gz              | 1.98        | 3.76e-04        | 3.72e-06        | 7.48e-04        | .058        | 1.84e-04        | 1.36e-02        |
| DISTAL_R_105.nii.gz              | 0.15        | 4.01e-05        | -4.88e-04       | 5.68e-04        | .970        | 1.04e-06        | 1.02e-03        |
| DISTAL_R_106.nii.gz              | 0.89        | 1.93e-04        | -2.34e-04       | 6.21e-04        | .460        | 3.69e-05        | 6.07e-03        |
| DISTAL_R_107.nii.gz              | 0.72        | 1.26e-04        | -2.17e-04       | 4.69e-04        | .520        | 2.42e-05        | 4.91e-03        |
| DISTAL_R_108.nii.gz              | 0.22        | 4.87e-05        | -3.80e-04       | 4.77e-04        | .906        | 2.33e-06        | 1.53e-03        |
| DISTAL_R_109.nii.gz              | 1.71        | 6.27e-04        | -9.33e-05       | 1.35e-03        | .194        | 1.36e-04        | 1.17e-02        |

**Table S16**

***ET\_PRS Lead\_DBS Extended Associations with grey matter diffusion magnetic resonance imaging (dMRI) – Radial Diffusivity (RD)***

| Tract               | <i>t</i> | $\beta$   | CI_low    | CI_up    | <i>p</i> | Eta2     | Cohens_f |
|---------------------|----------|-----------|-----------|----------|----------|----------|----------|
| DISTAL_R_110.nii.gz | -0.01    | -6.13e-07 | -2.40e-04 | 2.39e-04 | 1.00     | 1.18e-09 | 3.44e-05 |
| DISTAL_R_111.nii.gz | 1.55     | 3.40e-04  | -9.05e-05 | 7.70e-04 | .134     | 1.12e-04 | 1.06e-02 |
| DISTAL_R_112.nii.gz | 0.64     | 9.14e-05  | -1.90e-04 | 3.73e-04 | .577     | 1.90e-05 | 4.36e-03 |
| DISTAL_R_118.nii.gz | -0.20    | -3.40e-05 | -3.60e-04 | 2.92e-04 | 1.00     | 1.97e-06 | 1.40e-03 |
| DISTAL_R_13.nii.gz  | -0.78    | -2.44e-04 | -8.57e-04 | 3.68e-04 | .683     | 2.86e-05 | 5.35e-03 |
| DISTAL_R_14.nii.gz  | -1.36    | -2.16e-04 | -5.26e-04 | 9.45e-05 | .238     | 8.71e-05 | 9.33e-03 |
| DISTAL_R_16.nii.gz  | 1.84     | 8.85e-04  | -5.93e-05 | 1.83e-03 | .104     | 1.58e-04 | 1.26e-02 |
| DISTAL_R_2.nii.gz   | 0.20     | 2.67e-05  | -2.40e-04 | 2.94e-04 | .929     | 1.81e-06 | 1.34e-03 |
| DISTAL_R_24.nii.gz  | -0.44    | -8.31e-05 | -4.50e-04 | 2.84e-04 | .758     | 9.24e-06 | 3.04e-03 |
| DISTAL_R_26.nii.gz  | 0.51     | 8.72e-05  | -2.45e-04 | 4.19e-04 | .667     | 1.24e-05 | 3.52e-03 |
| DISTAL_R_28.nii.gz  | 1.25     | 5.06e-04  | -2.89e-04 | 1.30e-03 | .239     | 7.30e-05 | 8.54e-03 |
| DISTAL_R_29.nii.gz  | 0.33     | 1.30e-04  | -6.33e-04 | 8.93e-04 | .840     | 5.19e-06 | 2.28e-03 |
| DISTAL_R_35.nii.gz  | 1.37     | 6.66e-04  | -2.88e-04 | 1.62e-03 | .188     | 8.78e-05 | 9.37e-03 |
| DISTAL_R_36.nii.gz  | 0.80     | 1.10e-04  | -1.60e-04 | 3.79e-04 | .468     | 2.98e-05 | 5.46e-03 |
| DISTAL_R_37.nii.gz  | 1.73     | 4.51e-04  | -6.03e-05 | 9.63e-04 | .092     | 1.40e-04 | 1.18e-02 |
| DISTAL_R_4.nii.gz   | -0.01    | -1.37e-06 | -2.24e-04 | 2.21e-04 | 1.00     | 6.77e-09 | 8.23e-05 |
| DISTAL_R_40.nii.gz  | -0.90    | -2.19e-04 | -6.98e-04 | 2.60e-04 | .509     | 3.76e-05 | 6.13e-03 |
| DISTAL_R_47.nii.gz  | -1.15    | -2.40e-04 | -6.48e-04 | 1.68e-04 | .392     | 6.22e-05 | 7.89e-03 |
| DISTAL_R_49.nii.gz  | 1.36     | 2.07e-04  | -9.11e-05 | 5.06e-04 | .318     | 8.69e-05 | 9.32e-03 |
| DISTAL_R_6.nii.gz   | -0.56    | -7.51e-05 | -3.39e-04 | 1.89e-04 | .706     | 1.46e-05 | 3.82e-03 |
| DISTAL_R_60.nii.gz  | 0.90     | 1.55e-04  | -1.82e-04 | 4.92e-04 | .480     | 3.81e-05 | 6.17e-03 |
| DISTAL_R_63.nii.gz  | -0.19    | -4.83e-05 | -5.44e-04 | 4.47e-04 | .933     | 1.71e-06 | 1.31e-03 |
| DISTAL_R_68.nii.gz  | -0.26    | -6.78e-05 | -5.72e-04 | 4.36e-04 | .871     | 3.26e-06 | 1.81e-03 |

**Table S16**

***ET\_PRS Lead\_DBS Extended Associations with grey matter diffusion magnetic resonance imaging (dMRI) – Radial Diffusivity (RD)***

| Tract                                   | <i>t</i> | $\beta$   | CI_low    | CI_up    | <i>p</i> | Eta2     | Cohens_f |
|-----------------------------------------|----------|-----------|-----------|----------|----------|----------|----------|
| DISTAL_R_7.nii.gz                       | 0.67     | 1.59e-04  | -3.06e-04 | 6.24e-04 | .613     | 2.12e-05 | 4.60e-03 |
| DISTAL_R_70.nii.gz                      | 0.97     | 1.86e-04  | -1.89e-04 | 5.60e-04 | .364     | 4.43e-05 | 6.65e-03 |
| DISTAL_R_76.nii.gz                      | 1.40     | 2.02e-04  | -8.16e-05 | 4.86e-04 | .256     | 9.14e-05 | 9.56e-03 |
| DISTAL_R_8.nii.gz                       | -0.81    | -1.20e-04 | -4.11e-04 | 1.70e-04 | .574     | 3.09e-05 | 5.56e-03 |
| DISTAL_R_86.nii.gz                      | 0.74     | 1.43e-04  | -2.38e-04 | 5.25e-04 | .635     | 2.54e-05 | 5.04e-03 |
| DISTAL_R_87.nii.gz                      | 0.65     | 1.15e-04  | -2.32e-04 | 4.63e-04 | .630     | 1.98e-05 | 4.45e-03 |
| DISTAL_R_89.nii.gz                      | 0.49     | 9.52e-05  | -2.89e-04 | 4.79e-04 | .690     | 1.11e-05 | 3.33e-03 |
| DISTAL_R_91.nii.gz                      | 0.79     | 1.27e-04  | -1.87e-04 | 4.41e-04 | .525     | 2.93e-05 | 5.41e-03 |
| DISTAL_R_92.nii.gz                      | 0.59     | 7.86e-05  | -1.82e-04 | 3.40e-04 | .611     | 1.63e-05 | 4.04e-03 |
| DISTAL_R_93.nii.gz                      | 1.48     | 2.34e-04  | -7.58e-05 | 5.44e-04 | .152     | 1.03e-04 | 1.01e-02 |
| DISTAL_R_94.nii.gz                      | -0.14    | -1.87e-05 | -2.82e-04 | 2.44e-04 | .978     | 9.10e-07 | 9.54e-04 |
| DISTAL_R_97.nii.gz                      | 1.28     | 1.71e-04  | -9.08e-05 | 4.33e-04 | .315     | 7.68e-05 | 8.76e-03 |
| DISTAL_R_GPe.nii.gz                     | 0.29     | 5.77e-05  | -3.26e-04 | 4.42e-04 | .845     | 4.07e-06 | 2.02e-03 |
| DISTAL_R_GPi_sensorimotor.nii.gz        | -0.48    | -7.24e-05 | -3.69e-04 | 2.25e-04 | .696     | 1.07e-05 | 3.27e-03 |
| DISTAL_R_GPi.nii.gz                     | -0.09    | -2.05e-05 | -4.53e-04 | 4.12e-04 | 1.00     | 4.05e-07 | 6.36e-04 |
| DISTAL_R_RN.nii.gz                      | -1.09    | -2.43e-04 | -6.83e-04 | 1.96e-04 | .436     | 5.52e-05 | 7.43e-03 |
| DISTAL_R_STN_associative.nii.gz         | -0.72    | -2.20e-04 | -8.16e-04 | 3.76e-04 | .568     | 2.45e-05 | 4.95e-03 |
| DISTAL_R_STN_limbic.nii.gz              | -1.95    | -6.27e-04 | -1.26e-03 | 2.00e-06 | .112     | 1.79e-04 | 1.34e-02 |
| DISTAL_R_STN_motor.nii.gz               | -0.62    | -1.63e-04 | -6.82e-04 | 3.55e-04 | .591     | 1.79e-05 | 4.23e-03 |
| DISTAL_R_STN.nii.gz                     | -0.80    | -2.32e-04 | -8.00e-04 | 3.37e-04 | .467     | 2.98e-05 | 5.46e-03 |
| Human_Motor_Thalamus_L_A.nii.gz         | 1.68     | 6.39e-04  | -1.08e-04 | 1.39e-03 | .103     | 1.32e-04 | 1.15e-02 |
| Human_Motor_Thalamus_L_acbcbasc.nii.gz  | -0.73    | -1.21e-04 | -4.45e-04 | 2.03e-04 | .568     | 2.51e-05 | 5.01e-03 |
| Human_Motor_Thalamus_L_alfrxmtpc.nii.gz | 1.72     | 4.68e-04  | -6.63e-05 | 1.00e-03 | .095     | 1.38e-04 | 1.18e-02 |



Table S16

*ET\_PRS Lead\_DBS Extended Associations with grey matter diffusion magnetic resonance imaging (dMRI) – Radial Diffusivity (RD)*

| Tract                                        | <i>t</i>    | $\beta$         | CI_low          | CI_up           | <i>p</i>    | Eta2            | Cohens_f        |
|----------------------------------------------|-------------|-----------------|-----------------|-----------------|-------------|-----------------|-----------------|
| Human_Motor_Thalamus_L_BasalForebrain.nii.gz | 0.13        | 2.63e-05        | -3.67e-04       | 4.20e-04        | .985        | 8.03e-07        | 8.96e-04        |
| Human_Motor_Thalamus_L_CdPutVSt.nii.gz       | 1.17        | 1.87e-04        | -1.26e-04       | 5.00e-04        | .266        | 6.43e-05        | 8.02e-03        |
| Human_Motor_Thalamus_L_CMPf.nii.gz           | 1.22        | 1.79e-04        | -1.09e-04       | 4.67e-04        | .351        | 6.94e-05        | 8.33e-03        |
| Human_Motor_Thalamus_L_eml.nii.gz            | -0.13       | -2.92e-05       | -4.74e-04       | 4.16e-04        | 1.00        | 7.76e-07        | 8.81e-04        |
| Human_Motor_Thalamus_L_GPl.nii.gz            | -0.13       | -2.23e-05       | -3.71e-04       | 3.27e-04        | .990        | 7.35e-07        | 8.57e-04        |
| Human_Motor_Thalamus_L_GPm.nii.gz            | -0.39       | -7.49e-05       | -4.49e-04       | 3.00e-04        | .765        | 7.19e-06        | 2.68e-03        |
| Human_Motor_Thalamus_L_Hbl.nii.gz            | 2.08        | 1.11e-03        | 6.32e-05        | 2.16e-03        | .052        | 2.02e-04        | 1.42e-02        |
| Human_Motor_Thalamus_L_Hypothalamus.nii.gz   | 0.74        | 1.71e-04        | -2.80e-04       | 6.22e-04        | .721        | 2.58e-05        | 5.07e-03        |
| Human_Motor_Thalamus_L_ic.nii.gz             | 1.35        | 2.03e-04        | -9.24e-05       | 4.99e-04        | .245        | 8.51e-05        | 9.22e-03        |
| <b>Human_Motor_Thalamus_L_LD.nii.gz</b>      | <b>2.54</b> | <b>1.29e-03</b> | <b>2.96e-04</b> | <b>2.29e-03</b> | <b>.017</b> | <b>3.02e-04</b> | <b>1.74e-02</b> |
| Human_Motor_Thalamus_L_LG.nii.gz             | 0.63        | 1.25e-04        | -2.63e-04       | 5.13e-04        | .605        | 1.86e-05        | 4.31e-03        |
| Human_Motor_Thalamus_L_Li.nii.gz             | 1.22        | 2.15e-04        | -1.30e-04       | 5.60e-04        | .244        | 7.00e-05        | 8.36e-03        |
| Human_Motor_Thalamus_L_M.nii.gz              | 0.11        | 2.66e-05        | -4.57e-04       | 5.11e-04        | 1.00        | 5.44e-07        | 7.37e-04        |
| Human_Motor_Thalamus_L_MB.nii.gz             | 0.83        | 3.71e-04        | -5.03e-04       | 1.24e-03        | .558        | 3.24e-05        | 5.69e-03        |
| Human_Motor_Thalamus_L_MD.nii.gz             | 2.12        | 4.36e-04        | 3.21e-05        | 8.40e-04        | .054        | 2.10e-04        | 1.45e-02        |
| Human_Motor_Thalamus_L_MDCL.nii.gz           | 2.04        | 3.08e-04        | 1.22e-05        | 6.04e-04        | .057        | 1.95e-04        | 1.40e-02        |
| Human_Motor_Thalamus_L_MG.nii.gz             | -0.13       | -3.39e-05       | -5.47e-04       | 4.79e-04        | 1.00        | 7.86e-07        | 8.87e-04        |
| Human_Motor_Thalamus_L_MI.nii.gz             | -0.33       | -1.27e-04       | -8.90e-04       | 6.36e-04        | .819        | 4.99e-06        | 2.23e-03        |
| Human_Motor_Thalamus_L_Midbrain.nii.gz       | 0.61        | 8.67e-05        | -1.90e-04       | 3.64e-04        | .593        | 1.77e-05        | 4.20e-03        |
| Human_Motor_Thalamus_L_ot.nii.gz             | -0.14       | -2.77e-05       | -4.29e-04       | 3.73e-04        | .982        | 8.57e-07        | 9.26e-04        |
| Human_Motor_Thalamus_L_Po.nii.gz             | 0.01        | 1.85e-06        | -3.47e-04       | 3.51e-04        | 1.00        | 5.04e-09        | 7.10e-05        |
| Human_Motor_Thalamus_L_PPN.nii.gz            | -0.18       | -4.30e-05       | -5.23e-04       | 4.37e-04        | .946        | 1.45e-06        | 1.20e-03        |
| Human_Motor_Thalamus_L_Pul.nii.gz            | 1.11        | 1.81e-04        | -1.39e-04       | 5.00e-04        | .294        | 5.76e-05        | 7.59e-03        |

Table S16

*ET\_PRS Lead\_DBS Extended Associations with grey matter diffusion magnetic resonance imaging (dMRI) – Radial Diffusivity (RD)*

| Tract                                          | $t$         | $\beta$         | CI_low          | CI_up           | $p$         | Eta2            | Cohens_f        |
|------------------------------------------------|-------------|-----------------|-----------------|-----------------|-------------|-----------------|-----------------|
| Human_Motor_Thalamus_L_R.nii.gz                | -1.83       | -3.78e-04       | -7.84e-04       | 2.78e-05        | .124        | 1.56e-04        | 1.25e-02        |
| Human_Motor_Thalamus_L_Rt.nii.gz               | -0.26       | -3.41e-05       | -2.90e-04       | 2.22e-04        | .874        | 3.19e-06        | 1.79e-03        |
| Human_Motor_Thalamus_L_SN.nii.gz               | -0.64       | -1.36e-04       | -5.53e-04       | 2.82e-04        | .641        | 1.90e-05        | 4.36e-03        |
| Human_Motor_Thalamus_L_STN.nii.gz              | -1.26       | -3.33e-04       | -8.51e-04       | 1.84e-04        | .380        | 7.46e-05        | 8.64e-03        |
| Human_Motor_Thalamus_L_VAn.nii.gz              | -0.42       | -8.52e-05       | -4.81e-04       | 3.11e-04        | .741        | 8.33e-06        | 2.89e-03        |
| Human_Motor_Thalamus_L_VAp.nii.gz              | 0.29        | 4.36e-05        | -2.51e-04       | 3.38e-04        | .930        | 3.94e-06        | 1.99e-03        |
| Human_Motor_Thalamus_L_VLdVLv.nii.gz           | 1.23        | 1.54e-04        | -9.13e-05       | 3.99e-04        | .344        | 7.09e-05        | 8.42e-03        |
| Human_Motor_Thalamus_L_VPi.nii.gz              | -0.74       | -1.35e-04       | -4.92e-04       | 2.22e-04        | .561        | 2.57e-05        | 5.07e-03        |
| Human_Motor_Thalamus_L_VPIVPm.nii.gz           | 1.07        | 1.50e-04        | -1.24e-04       | 4.23e-04        | .390        | 5.40e-05        | 7.35e-03        |
| Human_Motor_Thalamus_R_A.nii.gz                | 1.32        | 4.88e-04        | -2.39e-04       | 1.22e-03        | .207        | 8.12e-05        | 9.01e-03        |
| Human_Motor_Thalamus_R_acbcbsc.nii.gz          | -1.02       | -1.73e-04       | -5.05e-04       | 1.58e-04        | .420        | 4.92e-05        | 7.02e-03        |
| Human_Motor_Thalamus_R_alfrfxmtpc.nii.gz       | 1.31        | 4.08e-04        | -2.02e-04       | 1.02e-03        | .209        | 8.05e-05        | 8.97e-03        |
| Human_Motor_Thalamus_R_BasalForebrain.nii.gz   | 0.10        | 2.13e-05        | -3.77e-04       | 4.20e-04        | 1.00        | 5.15e-07        | 7.18e-04        |
| Human_Motor_Thalamus_R_CdPutVSt.nii.gz         | 1.01        | 1.70e-04        | -1.60e-04       | 5.00e-04        | .345        | 4.77e-05        | 6.90e-03        |
| Human_Motor_Thalamus_R_CMPf.nii.gz             | 1.16        | 1.78e-04        | -1.22e-04       | 4.77e-04        | .336        | 6.35e-05        | 7.97e-03        |
| Human_Motor_Thalamus_R_Connectivetissue.nii.gz | 1.12        | 4.49e-04        | -3.36e-04       | 1.23e-03        | .361        | 5.89e-05        | 7.67e-03        |
| Human_Motor_Thalamus_R_eml.nii.gz              | -0.40       | -1.04e-04       | -6.11e-04       | 4.04e-04        | .758        | 7.51e-06        | 2.74e-03        |
| Human_Motor_Thalamus_R_GPl.nii.gz              | 0.22        | 3.77e-05        | -2.99e-04       | 3.74e-04        | .909        | 2.26e-06        | 1.50e-03        |
| Human_Motor_Thalamus_R_GPm.nii.gz              | -0.22       | -4.23e-05       | -4.25e-04       | 3.41e-04        | .912        | 2.19e-06        | 1.48e-03        |
| Human_Motor_Thalamus_R_Hbl.nii.gz              | 1.53        | 7.67e-04        | -2.13e-04       | 1.75e-03        | .153        | 1.10e-04        | 1.05e-02        |
| Human_Motor_Thalamus_R_Hypothalamus.nii.gz     | 0.24        | 5.51e-05        | -4.00e-04       | 5.10e-04        | .993        | 2.64e-06        | 1.63e-03        |
| Human_Motor_Thalamus_R_ic.nii.gz               | 1.29        | 1.97e-04        | -1.03e-04       | 4.96e-04        | .271        | 7.79e-05        | 8.83e-03        |
| <b>Human_Motor_Thalamus_R_LD.nii.gz</b>        | <b>2.46</b> | <b>1.26e-03</b> | <b>2.54e-04</b> | <b>2.26e-03</b> | <b>.019</b> | <b>2.83e-04</b> | <b>1.68e-02</b> |

Table S16

*ET\_PRS Lead\_DBS Extended Associations with grey matter diffusion magnetic resonance imaging (dMRI) – Radial Diffusivity (RD)*

| Tract                                  | $t$   | $\beta$   | CI_low    | CI_up    | $p$  | Eta2     | Cohens_f |
|----------------------------------------|-------|-----------|-----------|----------|------|----------|----------|
| Human_Motor_Thalamus_R_LG.nii.gz       | 1.54  | 3.19e-04  | -8.60e-05 | 7.24e-04 | .193 | 1.12e-04 | 1.06e-02 |
| Human_Motor_Thalamus_R_Li.nii.gz       | 1.33  | 2.20e-04  | -1.04e-04 | 5.45e-04 | .223 | 8.32e-05 | 9.12e-03 |
| Human_Motor_Thalamus_R_M.nii.gz        | -0.71 | -1.56e-04 | -5.88e-04 | 2.75e-04 | .524 | 2.37e-05 | 4.87e-03 |
| Human_Motor_Thalamus_R_MB.nii.gz       | 1.06  | 4.60e-04  | -3.93e-04 | 1.31e-03 | .457 | 5.23e-05 | 7.23e-03 |
| Human_Motor_Thalamus_R_MD.nii.gz       | 1.32  | 2.84e-04  | -1.36e-04 | 7.04e-04 | .204 | 8.21e-05 | 9.06e-03 |
| Human_Motor_Thalamus_R_MDCL.nii.gz     | 1.96  | 3.00e-04  | -8.39e-08 | 6.01e-04 | .055 | 1.80e-04 | 1.34e-02 |
| Human_Motor_Thalamus_R_MG.nii.gz       | -0.05 | -1.37e-05 | -5.26e-04 | 4.98e-04 | 1.00 | 1.29e-07 | 3.60e-04 |
| Human_Motor_Thalamus_R_MGC.nii.gz      | 0.86  | 1.66e-04  | -2.10e-04 | 5.42e-04 | .533 | 3.50e-05 | 5.91e-03 |
| Human_Motor_Thalamus_R_MI.nii.gz       | -0.84 | -4.03e-04 | -1.34e-03 | 5.39e-04 | .442 | 3.30e-05 | 5.74e-03 |
| Human_Motor_Thalamus_R_Midbrain.nii.gz | 0.31  | 4.39e-05  | -2.32e-04 | 3.20e-04 | .831 | 4.56e-06 | 2.13e-03 |
| Human_Motor_Thalamus_R_ot.nii.gz       | 1.25  | 3.50e-04  | -1.99e-04 | 8.98e-04 | .291 | 7.31e-05 | 8.55e-03 |
| Human_Motor_Thalamus_R_PC.nii.gz       | 1.39  | 3.43e-04  | -1.39e-04 | 8.25e-04 | .179 | 9.12e-05 | 9.55e-03 |
| Human_Motor_Thalamus_R_Po.nii.gz       | 1.01  | 1.70e-04  | -1.60e-04 | 5.00e-04 | .344 | 4.77e-05 | 6.91e-03 |
| Human_Motor_Thalamus_R_PPN.nii.gz      | -1.18 | -2.25e-04 | -5.97e-04 | 1.47e-04 | .344 | 6.57e-05 | 8.10e-03 |
| Human_Motor_Thalamus_R_Pul.nii.gz      | 1.10  | 1.82e-04  | -1.43e-04 | 5.07e-04 | .374 | 5.66e-05 | 7.53e-03 |
| Human_Motor_Thalamus_R_R.nii.gz        | -1.11 | -2.40e-04 | -6.65e-04 | 1.85e-04 | .422 | 5.74e-05 | 7.58e-03 |
| Human_Motor_Thalamus_R_Rt.nii.gz       | -0.07 | -8.48e-06 | -2.49e-04 | 2.32e-04 | 1.00 | 2.24e-07 | 4.73e-04 |
| Human_Motor_Thalamus_R_SN.nii.gz       | -1.30 | -2.60e-04 | -6.53e-04 | 1.33e-04 | .279 | 7.89e-05 | 8.88e-03 |
| Human_Motor_Thalamus_R_STN.nii.gz      | -0.92 | -2.50e-04 | -7.81e-04 | 2.80e-04 | .434 | 4.01e-05 | 6.33e-03 |
| Human_Motor_Thalamus_R_VAn.nii.gz      | -0.31 | -6.03e-05 | -4.47e-04 | 3.26e-04 | .836 | 4.38e-06 | 2.09e-03 |
| Human_Motor_Thalamus_R_VAp.nii.gz      | 0.25  | 3.82e-05  | -2.66e-04 | 3.43e-04 | .886 | 2.83e-06 | 1.68e-03 |
| Human_Motor_Thalamus_R_VLdVLv.nii.gz   | 1.05  | 1.36e-04  | -1.18e-04 | 3.91e-04 | .360 | 5.16e-05 | 7.18e-03 |
| Human_Motor_Thalamus_R_VPi.nii.gz      | -1.28 | -2.30e-04 | -5.82e-04 | 1.22e-04 | .368 | 7.68e-05 | 8.76e-03 |

**Table S16**

***ET\_PRS Lead\_DBs Extended Associations with grey matter diffusion magnetic resonance imaging (dMRI) – Radial Diffusivity (RD)***

| Tract                                    | <i>t</i> | $\beta$   | CI_low    | CI_up    | <i>p</i> | Eta2     | Cohens_f |
|------------------------------------------|----------|-----------|-----------|----------|----------|----------|----------|
| Human_Motor_Thalamus_R_VPIVPm.nii.gz     | 0.06     | 8.20e-06  | -2.57e-04 | 2.73e-04 | 1.00     | 1.72e-07 | 4.15e-04 |
| HybraPD_Atlas_L_Ca.nii.gz                | 0.77     | 1.82e-04  | -2.79e-04 | 6.43e-04 | .483     | 2.81e-05 | 5.30e-03 |
| HybraPD_Atlas_L_DN.nii.gz                | -0.54    | -9.05e-05 | -4.19e-04 | 2.38e-04 | .649     | 1.36e-05 | 3.69e-03 |
| HybraPD_Atlas_L_GPe.nii.gz               | 0.24     | 5.18e-05  | -3.63e-04 | 4.67e-04 | .976     | 2.81e-06 | 1.68e-03 |
| HybraPD_Atlas_L_GPi.nii.gz               | -0.50    | -1.06e-04 | -5.20e-04 | 3.07e-04 | .676     | 1.19e-05 | 3.45e-03 |
| HybraPD_Atlas_L_NAC.nii.gz               | -0.96    | -2.16e-04 | -6.55e-04 | 2.23e-04 | .461     | 4.35e-05 | 6.60e-03 |
| HybraPD_Atlas_L_Pu.nii.gz                | 0.82     | 1.16e-04  | -1.63e-04 | 3.94e-04 | .497     | 3.11e-05 | 5.58e-03 |
| HybraPD_Atlas_L_RN.nii.gz                | -1.78    | -3.92e-04 | -8.23e-04 | 4.03e-05 | .138     | 1.48e-04 | 1.22e-02 |
| HybraPD_Atlas_L_TH.MN.nii.gz             | 1.53     | 2.32e-04  | -6.60e-05 | 5.31e-04 | .175     | 1.09e-04 | 1.04e-02 |
| HybraPD_Atlas_L_TH.P.nii.gz              | -0.37    | -6.27e-05 | -3.98e-04 | 2.73e-04 | .873     | 6.29e-06 | 2.51e-03 |
| HybraPD_Atlas_L_TH.VN.nii.gz             | 1.27     | 1.48e-04  | -7.96e-05 | 3.76e-04 | .247     | 7.62e-05 | 8.73e-03 |
| HybraPD_Atlas_R_Ca.nii.gz                | 0.34     | 9.40e-05  | -4.48e-04 | 6.36e-04 | .807     | 5.42e-06 | 2.33e-03 |
| HybraPD_Atlas_R_DN.nii.gz                | -0.26    | -4.35e-05 | -3.76e-04 | 2.89e-04 | .877     | 3.09e-06 | 1.76e-03 |
| HybraPD_Atlas_R_GPe.nii.gz               | 0.75     | 1.50e-04  | -2.43e-04 | 5.43e-04 | .695     | 2.63e-05 | 5.13e-03 |
| HybraPD_Atlas_R_GPi.nii.gz               | -0.13    | -2.66e-05 | -4.32e-04 | 3.78e-04 | .987     | 7.79e-07 | 8.83e-04 |
| HybraPD_Atlas_R_NAC.nii.gz               | -0.71    | -1.57e-04 | -5.87e-04 | 2.74e-04 | .581     | 2.38e-05 | 4.88e-03 |
| HybraPD_Atlas_R_Pu.nii.gz                | 0.42     | 5.96e-05  | -2.17e-04 | 3.36e-04 | .740     | 8.37e-06 | 2.89e-03 |
| HybraPD_Atlas_R_RN.nii.gz                | -0.93    | -2.16e-04 | -6.72e-04 | 2.40e-04 | .554     | 4.05e-05 | 6.36e-03 |
| HybraPD_Atlas_R_TH.MN.nii.gz             | 1.22     | 1.97e-04  | -1.20e-04 | 5.15e-04 | .307     | 6.96e-05 | 8.34e-03 |
| HybraPD_Atlas_R_TH.P.nii.gz              | -0.20    | -3.76e-05 | -4.09e-04 | 3.33e-04 | .927     | 1.85e-06 | 1.36e-03 |
| HybraPD_Atlas_R_TH.VN.nii.gz             | 0.68     | 8.27e-05  | -1.56e-04 | 3.21e-04 | .546     | 2.16e-05 | 4.65e-03 |
| Melbourne_Subcortex_Atlas_LH_aCAU.nii.gz | 1.33     | 4.03e-04  | -1.93e-04 | 9.98e-04 | .226     | 8.24e-05 | 9.08e-03 |
| Melbourne_Subcortex_Atlas_LH_aGP.nii.gz  | -0.37    | -7.83e-05 | -4.96e-04 | 3.40e-04 | .785     | 6.32e-06 | 2.51e-03 |

**Table S16**

***ET\_PRS Lead\_DBs Extended Associations with grey matter diffusion magnetic resonance imaging (dMRI) – Radial Diffusivity (RD)***

| Tract                                               | <i>t</i>    | $\beta$         | CI_low          | CI_up           | <i>p</i>    | Eta2            | Cohens_f        |
|-----------------------------------------------------|-------------|-----------------|-----------------|-----------------|-------------|-----------------|-----------------|
| Melbourne_Subcortex_Atlas_LH_aHIP.nii.gz            | -0.03       | -4.97e-06       | -3.45e-04       | 3.35e-04        | 1.00        | 3.85e-08        | 1.96e-04        |
| Melbourne_Subcortex_Atlas_LH_AMY.nii.gz             | -0.44       | -7.11e-05       | -3.85e-04       | 2.42e-04        | .722        | 9.26e-06        | 3.04e-03        |
| Melbourne_Subcortex_Atlas_LH_aPUT.nii.gz            | 0.46        | 6.37e-05        | -2.10e-04       | 3.38e-04        | .792        | 9.76e-06        | 3.12e-03        |
| Melbourne_Subcortex_Atlas_LH_aTHA.nii.gz            | 2.08        | 4.37e-04        | 2.56e-05        | 8.48e-04        | .051        | 2.03e-04        | 1.43e-02        |
| Melbourne_Subcortex_Atlas_LH_CAU-body.nii.gz        | 1.57        | 5.06e-04        | -1.28e-04       | 1.14e-03        | .144        | 1.15e-04        | 1.07e-02        |
| Melbourne_Subcortex_Atlas_LH_CAU-DA.nii.gz          | 1.44        | 5.02e-04        | -1.84e-04       | 1.19e-03        | .166        | 9.66e-05        | 9.83e-03        |
| Melbourne_Subcortex_Atlas_LH_CAU-tail.nii.gz        | 1.92        | 6.32e-04        | -1.20e-05       | 1.28e-03        | .060        | 1.73e-04        | 1.32e-02        |
| Melbourne_Subcortex_Atlas_LH_CAU-VA.nii.gz          | 1.02        | 2.94e-04        | -2.68e-04       | 8.57e-04        | .336        | 4.92e-05        | 7.02e-03        |
| Melbourne_Subcortex_Atlas_LH_CAU.nii.gz             | 1.49        | 4.52e-04        | -1.42e-04       | 1.05e-03        | .166        | 1.04e-04        | 1.02e-02        |
| Melbourne_Subcortex_Atlas_LH_GP.nii.gz              | -0.31       | -5.37e-05       | -3.90e-04       | 2.82e-04        | .830        | 4.59e-06        | 2.14e-03        |
| Melbourne_Subcortex_Atlas_LH_HIP-body.nii.gz        | 1.38        | 2.80e-04        | -1.17e-04       | 6.77e-04        | .230        | 8.94e-05        | 9.46e-03        |
| Melbourne_Subcortex_Atlas_LH_HIP-head-1.nii.gz      | 0.18        | 3.21e-05        | -3.12e-04       | 3.76e-04        | .940        | 1.57e-06        | 1.25e-03        |
| Melbourne_Subcortex_Atlas_LH_HIP-head-m.nii.gz      | -0.33       | -7.11e-05       | -4.94e-04       | 3.51e-04        | .816        | 5.10e-06        | 2.26e-03        |
| Melbourne_Subcortex_Atlas_LH_HIP-head-<br>m1.nii.gz | -0.34       | -6.79e-05       | -4.58e-04       | 3.22e-04        | .896        | 5.45e-06        | 2.34e-03        |
| Melbourne_Subcortex_Atlas_LH_HIP-head-<br>m2.nii.gz | -0.28       | -7.32e-05       | -5.82e-04       | 4.36e-04        | .856        | 3.72e-06        | 1.93e-03        |
| <b>Melbourne_Subcortex_Atlas_LH_HIP-tail.nii.gz</b> | <b>2.61</b> | <b>6.12e-04</b> | <b>1.53e-04</b> | <b>1.07e-03</b> | <b>.012</b> | <b>3.20e-04</b> | <b>1.79e-02</b> |
| Melbourne_Subcortex_Atlas_LH_HIP.nii.gz             | 0.99        | 1.70e-04        | -1.68e-04       | 5.07e-04        | .397        | 4.55e-05        | 6.74e-03        |
| Melbourne_Subcortex_Atlas_LH_lAMY.nii.gz            | -0.90       | -1.23e-04       | -3.88e-04       | 1.43e-04        | .402        | 3.83e-05        | 6.19e-03        |
| Melbourne_Subcortex_Atlas_LH_mAMY.nii.gz            | -0.04       | -7.52e-06       | -4.07e-04       | 3.92e-04        | 1.00        | 6.38e-08        | 2.53e-04        |
| Melbourne_Subcortex_Atlas_LH_NAc-core.nii.gz        | 0.79        | 1.94e-04        | -2.85e-04       | 6.73e-04        | .469        | 2.96e-05        | 5.44e-03        |
| Melbourne_Subcortex_Atlas_LH_NAc-shell.nii.gz       | -0.26       | -4.80e-05       | -4.06e-04       | 3.10e-04        | .872        | 3.24e-06        | 1.80e-03        |

**Table S16**

***ET\_PRS Lead\_DBs Extended Associations with grey matter diffusion magnetic resonance imaging (dMRI) – Radial Diffusivity (RD)***

| Tract                                              | <i>t</i>    | $\beta$         | CI_low          | CI_up           | <i>p</i>    | Eta2            | Cohens_f        |
|----------------------------------------------------|-------------|-----------------|-----------------|-----------------|-------------|-----------------|-----------------|
| Melbourne_Subcortex_Atlas_LH_NAc.nii.gz            | 0.32        | 6.00e-05        | -3.08e-04       | 4.28e-04        | .824        | 4.80e-06        | 2.19e-03        |
| Melbourne_Subcortex_Atlas_LH_pCAU.nii.gz           | 1.69        | 5.43e-04        | -8.82e-05       | 1.17e-03        | .112        | 1.33e-04        | 1.15e-02        |
| Melbourne_Subcortex_Atlas_LH_pGP.nii.gz            | -0.18       | -2.56e-05       | -3.05e-04       | 2.53e-04        | 1.00        | 1.51e-06        | 1.23e-03        |
| Melbourne_Subcortex_Atlas_LH_pHIP.nii.gz           | 1.91        | 3.91e-04        | -9.27e-06       | 7.90e-04        | .068        | 1.72e-04        | 1.31e-02        |
| Melbourne_Subcortex_Atlas_LH_pPUT.nii.gz           | 0.14        | 1.77e-05        | -2.38e-04       | 2.74e-04        | .981        | 8.60e-07        | 9.27e-04        |
| Melbourne_Subcortex_Atlas_LH_pTHA.nii.gz           | 1.38        | 2.17e-04        | -9.02e-05       | 5.24e-04        | .203        | 8.98e-05        | 9.48e-03        |
| Melbourne_Subcortex_Atlas_LH_PUT-DA.nii.gz         | 0.45        | 6.40e-05        | -2.15e-04       | 3.43e-04        | .718        | 9.49e-06        | 3.08e-03        |
| Melbourne_Subcortex_Atlas_LH_PUT-DP.nii.gz         | 0.73        | 9.83e-05        | -1.66e-04       | 3.63e-04        | .570        | 2.49e-05        | 4.99e-03        |
| Melbourne_Subcortex_Atlas_LH_PUT-VA.nii.gz         | 0.43        | 6.30e-05        | -2.24e-04       | 3.50e-04        | .818        | 8.69e-06        | 2.95e-03        |
| Melbourne_Subcortex_Atlas_LH_PUT-VP.nii.gz         | -0.46       | -6.32e-05       | -3.31e-04       | 2.04e-04        | .708        | 1.01e-05        | 3.17e-03        |
| Melbourne_Subcortex_Atlas_LH_PUT.nii.gz            | 0.31        | 3.94e-05        | -2.13e-04       | 2.92e-04        | .836        | 4.38e-06        | 2.09e-03        |
| <b>Melbourne_Subcortex_Atlas_LH_THA-DA.nii.gz</b>  | <b>2.83</b> | <b>6.81e-04</b> | <b>2.09e-04</b> | <b>1.15e-03</b> | <b>.006</b> | <b>3.75e-04</b> | <b>1.94e-02</b> |
| <b>Melbourne_Subcortex_Atlas_LH_THA-DAI.nii.gz</b> | <b>2.34</b> | <b>3.38e-04</b> | <b>5.48e-05</b> | <b>6.21e-04</b> | <b>.024</b> | <b>2.57e-04</b> | <b>1.60e-02</b> |
| <b>Melbourne_Subcortex_Atlas_LH_THA-DAm.nii.gz</b> | <b>2.77</b> | <b>9.63e-04</b> | <b>2.82e-04</b> | <b>1.64e-03</b> | <b>.008</b> | <b>3.60e-04</b> | <b>1.90e-02</b> |
| Melbourne_Subcortex_Atlas_LH_THA-DP.nii.gz         | 0.88        | 1.73e-04        | -2.14e-04       | 5.59e-04        | .419        | 3.60e-05        | 6.00e-03        |
| Melbourne_Subcortex_Atlas_LH_THA-VA.nii.gz         | 1.37        | 2.99e-04        | -1.30e-04       | 7.27e-04        | .236        | 8.76e-05        | 9.36e-03        |
| Melbourne_Subcortex_Atlas_LH_THA-VAi.nii.gz        | 0.71        | 1.66e-04        | -2.93e-04       | 6.25e-04        | .527        | 2.35e-05        | 4.84e-03        |
| Melbourne_Subcortex_Atlas_LH_THA-VAia.nii.gz       | 0.12        | 3.40e-05        | -5.18e-04       | 5.86e-04        | .994        | 6.84e-07        | 8.27e-04        |
| Melbourne_Subcortex_Atlas_LH_THA-VAip.nii.gz       | 1.20        | 2.48e-04        | -1.58e-04       | 6.54e-04        | .282        | 6.74e-05        | 8.21e-03        |
| <b>Melbourne_Subcortex_Atlas_LH_THA-VAs.nii.gz</b> | <b>2.25</b> | <b>5.07e-04</b> | <b>6.55e-05</b> | <b>9.48e-04</b> | <b>.034</b> | <b>2.38e-04</b> | <b>1.54e-02</b> |
| Melbourne_Subcortex_Atlas_LH_THA-VP.nii.gz         | 1.95        | 2.66e-04        | -7.76e-07       | 5.33e-04        | .080        | 1.79e-04        | 1.34e-02        |
| Melbourne_Subcortex_Atlas_LH_THA-VPl.nii.gz        | 1.56        | 2.01e-04        | -5.10e-05       | 4.53e-04        | .185        | 1.15e-04        | 1.07e-02        |

**Table S16**

***ET\_PRS Lead\_DBS Extended Associations with grey matter diffusion magnetic resonance imaging (dMRI) – Radial Diffusivity (RD)***

| Tract                                               | <i>t</i> | $\beta$   | CI_low    | CI_up    | <i>p</i> | Eta2     | Cohens_f |
|-----------------------------------------------------|----------|-----------|-----------|----------|----------|----------|----------|
| Melbourne_Subcortex_Atlas_LH_THA-VPm.nii.gz         | 1.97     | 3.19e-04  | 2.00e-06  | 6.35e-04 | .076     | 1.82e-04 | 1.35e-02 |
| Melbourne_Subcortex_Atlas_RH_aCAU.nii.gz            | 0.44     | 1.03e-04  | -3.55e-04 | 5.61e-04 | .727     | 9.04e-06 | 3.01e-03 |
| Melbourne_Subcortex_Atlas_RH_aGP.nii.gz             | -0.03    | -5.28e-06 | -4.11e-04 | 4.01e-04 | 1.00     | 3.04e-08 | 1.74e-04 |
| Melbourne_Subcortex_Atlas_RH_aHIP.nii.gz            | -0.01    | -1.75e-06 | -3.30e-04 | 3.27e-04 | 1.00     | 5.09e-09 | 7.13e-05 |
| Melbourne_Subcortex_Atlas_RH_AMY.nii.gz             | -0.43    | -6.42e-05 | -3.55e-04 | 2.27e-04 | .813     | 8.76e-06 | 2.96e-03 |
| Melbourne_Subcortex_Atlas_RH_aPUT.nii.gz            | 0.17     | 2.31e-05  | -2.46e-04 | 2.92e-04 | .953     | 1.33e-06 | 1.15e-03 |
| Melbourne_Subcortex_Atlas_RH_aTHA.nii.gz            | 1.72     | 3.13e-04  | -4.43e-05 | 6.69e-04 | .095     | 1.38e-04 | 1.18e-02 |
| Melbourne_Subcortex_Atlas_RH_CAU-body.nii.gz        | 0.81     | 1.83e-04  | -2.60e-04 | 6.25e-04 | .460     | 3.07e-05 | 5.54e-03 |
| Melbourne_Subcortex_Atlas_RH_CAU-DA.nii.gz          | 0.41     | 1.17e-04  | -4.37e-04 | 6.72e-04 | .746     | 8.07e-06 | 2.84e-03 |
| Melbourne_Subcortex_Atlas_RH_CAU-tail.nii.gz        | 0.97     | 1.93e-04  | -1.97e-04 | 5.83e-04 | .365     | 4.41e-05 | 6.64e-03 |
| Melbourne_Subcortex_Atlas_RH_CAU-VA.nii.gz          | 0.41     | 8.05e-05  | -3.01e-04 | 4.62e-04 | .747     | 8.01e-06 | 2.83e-03 |
| Melbourne_Subcortex_Atlas_RH_CAU.nii.gz             | 0.59     | 1.31e-04  | -3.03e-04 | 5.64e-04 | .610     | 1.63e-05 | 4.04e-03 |
| Melbourne_Subcortex_Atlas_RH_GP.nii.gz              | 0.10     | 1.58e-05  | -3.09e-04 | 3.40e-04 | 1.00     | 4.26e-07 | 6.53e-04 |
| Melbourne_Subcortex_Atlas_RH_HIP-body.nii.gz        | 1.17     | 2.41e-04  | -1.63e-04 | 6.45e-04 | .297     | 6.40e-05 | 8.00e-03 |
| Melbourne_Subcortex_Atlas_RH_HIP-head-l.nii.gz      | -0.09    | -1.62e-05 | -3.63e-04 | 3.31e-04 | 1.00     | 3.94e-07 | 6.28e-04 |
| Melbourne_Subcortex_Atlas_RH_HIP-head-m.nii.gz      | -0.09    | -1.71e-05 | -4.04e-04 | 3.69e-04 | 1.00     | 3.52e-07 | 5.94e-04 |
| Melbourne_Subcortex_Atlas_RH_HIP-head-<br>m1.nii.gz | -0.81    | -1.49e-04 | -5.09e-04 | 2.10e-04 | .458     | 3.10e-05 | 5.57e-03 |
| Melbourne_Subcortex_Atlas_RH_HIP-head-<br>m2.nii.gz | 0.82     | 2.12e-04  | -2.94e-04 | 7.18e-04 | .453     | 3.16e-05 | 5.62e-03 |
| Melbourne_Subcortex_Atlas_RH_HIP-tail.nii.gz        | 1.40     | 3.17e-04  | -1.26e-04 | 7.60e-04 | .178     | 9.19e-05 | 9.59e-03 |
| Melbourne_Subcortex_Atlas_RH_HIP.nii.gz             | 0.72     | 1.20e-04  | -2.06e-04 | 4.46e-04 | .573     | 2.46e-05 | 4.96e-03 |
| Melbourne_Subcortex_Atlas_RH_lAMY.nii.gz            | -1.05    | -1.40e-04 | -4.00e-04 | 1.21e-04 | .404     | 5.17e-05 | 7.19e-03 |

**Table S16**

***ET\_PRS Lead\_DBS Extended Associations with grey matter diffusion magnetic resonance imaging (dMRI) – Radial Diffusivity (RD)***

| Tract                                              | <i>t</i>    | $\beta$         | CI_low          | CI_up           | <i>p</i>    | Eta2            | Cohens_f        |
|----------------------------------------------------|-------------|-----------------|-----------------|-----------------|-------------|-----------------|-----------------|
| Melbourne_Subcortex_Atlas_RH_mAMY.nii.gz           | 0.12        | 2.15e-05        | -3.29e-04       | 3.72e-04        | .995        | 6.74e-07        | 8.21e-04        |
| Melbourne_Subcortex_Atlas_RH_NAc-core.nii.gz       | -0.24       | -4.57e-05       | -4.24e-04       | 3.33e-04        | .894        | 2.62e-06        | 1.62e-03        |
| Melbourne_Subcortex_Atlas_RH_NAc-shell.nii.gz      | -0.67       | -1.19e-04       | -4.67e-04       | 2.29e-04        | .553        | 2.11e-05        | 4.59e-03        |
| Melbourne_Subcortex_Atlas_RH_NAc.nii.gz            | -0.52       | -8.58e-05       | -4.10e-04       | 2.38e-04        | .664        | 1.26e-05        | 3.55e-03        |
| Melbourne_Subcortex_Atlas_RH_pCAU.nii.gz           | 0.86        | 1.85e-04        | -2.37e-04       | 6.06e-04        | .429        | 3.46e-05        | 5.88e-03        |
| Melbourne_Subcortex_Atlas_RH_pGP.nii.gz            | 0.27        | 3.74e-05        | -2.30e-04       | 3.05e-04        | .863        | 3.51e-06        | 1.87e-03        |
| Melbourne_Subcortex_Atlas_RH_pHIP.nii.gz           | 1.32        | 2.65e-04        | -1.27e-04       | 6.58e-04        | .204        | 8.22e-05        | 9.07e-03        |
| Melbourne_Subcortex_Atlas_RH_pPUT.nii.gz           | 0.69        | 8.92e-05        | -1.63e-04       | 3.41e-04        | .606        | 2.26e-05        | 4.75e-03        |
| Melbourne_Subcortex_Atlas_RH_pTHA.nii.gz           | 1.52        | 2.47e-04        | -7.11e-05       | 5.65e-04        | .157        | 1.09e-04        | 1.04e-02        |
| Melbourne_Subcortex_Atlas_RH_PUT-DA.nii.gz         | 0.60        | 8.24e-05        | -1.87e-04       | 3.51e-04        | .603        | 1.69e-05        | 4.11e-03        |
| Melbourne_Subcortex_Atlas_RH_PUT-DP.nii.gz         | 1.04        | 1.39e-04        | -1.23e-04       | 4.02e-04        | .329        | 5.06e-05        | 7.11e-03        |
| Melbourne_Subcortex_Atlas_RH_PUT-VA.nii.gz         | -0.25       | -3.71e-05       | -3.25e-04       | 2.50e-04        | .880        | 3.00e-06        | 1.73e-03        |
| Melbourne_Subcortex_Atlas_RH_PUT-VP.nii.gz         | 0.29        | 3.73e-05        | -2.17e-04       | 2.92e-04        | .908        | 3.86e-06        | 1.96e-03        |
| Melbourne_Subcortex_Atlas_RH_PUT.nii.gz            | 0.45        | 5.71e-05        | -1.92e-04       | 3.06e-04        | .718        | 9.49e-06        | 3.08e-03        |
| <b>Melbourne_Subcortex_Atlas_RH_THA-DA.nii.gz</b>  | <b>2.67</b> | <b>6.00e-04</b> | <b>1.59e-04</b> | <b>1.04e-03</b> | <b>.011</b> | <b>3.33e-04</b> | <b>1.83e-02</b> |
| Melbourne_Subcortex_Atlas_RH_THA-DAL.nii.gz        | 1.99        | 2.79e-04        | 4.15e-06        | 5.54e-04        | .065        | 1.86e-04        | 1.36e-02        |
| <b>Melbourne_Subcortex_Atlas_RH_THA-DAm.nii.gz</b> | <b>2.67</b> | <b>8.27e-04</b> | <b>2.19e-04</b> | <b>1.44e-03</b> | <b>.011</b> | <b>3.33e-04</b> | <b>1.83e-02</b> |
| Melbourne_Subcortex_Atlas_RH_THA-DP.nii.gz         | 1.71        | 3.59e-04        | -5.35e-05       | 7.71e-04        | .138        | 1.36e-04        | 1.17e-02        |
| Melbourne_Subcortex_Atlas_RH_THA-VA.nii.gz         | 0.82        | 1.49e-04        | -2.05e-04       | 5.02e-04        | .452        | 3.17e-05        | 5.63e-03        |
| Melbourne_Subcortex_Atlas_RH_THA-VAi.nii.gz        | 0.24        | 4.57e-05        | -3.32e-04       | 4.23e-04        | .894        | 2.64e-06        | 1.62e-03        |
| Melbourne_Subcortex_Atlas_RH_THA-VAia.nii.gz       | -0.64       | -1.44e-04       | -5.86e-04       | 2.99e-04        | .577        | 1.90e-05        | 4.36e-03        |
| Melbourne_Subcortex_Atlas_RH_THA-VAip.nii.gz       | 0.97        | 1.77e-04        | -1.82e-04       | 5.36e-04        | .367        | 4.38e-05        | 6.62e-03        |



**Table S16**

***ET\_PRS Lead\_DBS Extended Associations with grey matter diffusion magnetic resonance imaging (dMRI) – Radial Diffusivity (RD)***

| Tract                                                       | <i>t</i> | $\beta$   | CI_low    | CI_up    | <i>p</i> | Eta2     | Cohens_f |
|-------------------------------------------------------------|----------|-----------|-----------|----------|----------|----------|----------|
| Melbourne_Subcortex_Atlas_RH_THA-VAs.nii.gz                 | 1.64     | 3.16e-04  | -6.10e-05 | 6.93e-04 | .110     | 1.27e-04 | 1.12e-02 |
| Melbourne_Subcortex_Atlas_RH_THA-VP.nii.gz                  | 1.04     | 1.40e-04  | -1.23e-04 | 4.04e-04 | .327     | 5.09e-05 | 7.13e-03 |
| Melbourne_Subcortex_Atlas_RH_THA-VPl.nii.gz                 | 0.19     | 2.46e-05  | -2.34e-04 | 2.83e-04 | .999     | 1.63e-06 | 1.28e-03 |
| Melbourne_Subcortex_Atlas_RH_THA-VPm.nii.gz                 | 1.64     | 2.55e-04  | -5.03e-05 | 5.61e-04 | .112     | 1.26e-04 | 1.12e-02 |
| MNI_PD25_subcortical_LH_amygdala.nii.gz                     | -1.17    | -1.56e-04 | -4.18e-04 | 1.06e-04 | .267     | 6.41e-05 | 8.00e-03 |
| MNI_PD25_subcortical_LH_caudate.nii.gz                      | 1.26     | 3.03e-04  | -1.68e-04 | 7.74e-04 | .228     | 7.44e-05 | 8.63e-03 |
| MNI_PD25_subcortical_LH_globus_pallidus_extern<br>us.nii.gz | -0.15    | -2.36e-05 | -3.33e-04 | 2.86e-04 | .970     | 1.04e-06 | 1.02e-03 |
| MNI_PD25_subcortical_LH_globus_pallidus_intern<br>us.nii.gz | -0.39    | -7.25e-05 | -4.33e-04 | 2.88e-04 | .762     | 7.30e-06 | 2.70e-03 |
| MNI_PD25_subcortical_LH_hippocampus.nii.gz                  | 1.32     | 2.23e-04  | -1.08e-04 | 5.53e-04 | .228     | 8.18e-05 | 9.04e-03 |
| MNI_PD25_subcortical_LH_nucleus_accumbens.nii.<br>gz        | -0.56    | -1.11e-04 | -5.00e-04 | 2.77e-04 | .632     | 1.48e-05 | 3.84e-03 |
| MNI_PD25_subcortical_LH_putamen.nii.gz                      | 0.40     | 5.16e-05  | -2.00e-04 | 3.03e-04 | .757     | 7.57e-06 | 2.75e-03 |
| MNI_PD25_subcortical_LH_red_nucleus.nii.gz                  | -1.74    | -3.53e-04 | -7.50e-04 | 4.43e-05 | .128     | 1.42e-04 | 1.19e-02 |
| MNI_PD25_subcortical_LH_substantia_nigra.nii.gz             | -0.25    | -5.76e-05 | -5.11e-04 | 3.96e-04 | 1.00     | 2.91e-06 | 1.71e-03 |
| MNI_PD25_subcortical_LH_subthalamic_nucleus.ni<br>i.gz      | -1.21    | -3.02e-04 | -7.91e-04 | 1.88e-04 | .357     | 6.83e-05 | 8.26e-03 |
| MNI_PD25_subcortical_LH_thalamus.nii.gz                     | 1.80     | 2.61e-04  | -2.39e-05 | 5.45e-04 | .100     | 1.51e-04 | 1.23e-02 |
| MNI_PD25_subcortical_RH_amygdala.nii.gz                     | -1.00    | -1.37e-04 | -4.03e-04 | 1.30e-04 | .347     | 4.73e-05 | 6.88e-03 |
| MNI_PD25_subcortical_RH_caudate.nii.gz                      | 0.77     | 2.18e-04  | -3.38e-04 | 7.74e-04 | .486     | 2.77e-05 | 5.26e-03 |
| MNI_PD25_subcortical_RH_globus_pallidus_extern<br>us.nii.gz | 0.33     | 5.26e-05  | -2.59e-04 | 3.64e-04 | .974     | 5.12e-06 | 2.26e-03 |

Table S16

*ET\_PRS Lead\_DBS Extended Associations with grey matter diffusion magnetic resonance imaging (dMRI) – Radial Diffusivity (RD)*

| Tract                                                   | <i>t</i>    | $\beta$         | CI_low          | CI_up           | <i>p</i>    | Eta2            | Cohens_f        |
|---------------------------------------------------------|-------------|-----------------|-----------------|-----------------|-------------|-----------------|-----------------|
| MNI_PD25_subcortical_RH_globus_pallidus_Internus.nii.gz | -0.21       | -3.70e-05       | -3.91e-04       | 3.16e-04        | .921        | 1.98e-06        | 1.41e-03        |
| MNI_PD25_subcortical_RH_hippocampus.nii.gz              | 0.83        | 1.36e-04        | -1.84e-04       | 4.55e-04        | .481        | 3.26e-05        | 5.71e-03        |
| MNI_PD25_subcortical_RH_nucleus_accumbens.nii.gz        | -0.92       | -1.79e-04       | -5.63e-04       | 2.04e-04        | .495        | 3.93e-05        | 6.27e-03        |
| MNI_PD25_subcortical_RH_putamen.nii.gz                  | 0.43        | 5.46e-05        | -1.95e-04       | 3.04e-04        | .736        | 8.58e-06        | 2.93e-03        |
| MNI_PD25_subcortical_RH_red_nucleus.nii.gz              | -1.12       | -2.34e-04       | -6.44e-04       | 1.75e-04        | .360        | 5.90e-05        | 7.68e-03        |
| MNI_PD25_subcortical_RH_substantia_nigra.nii.gz         | -1.01       | -2.19e-04       | -6.43e-04       | 2.05e-04        | .427        | 4.82e-05        | 6.94e-03        |
| MNI_PD25_subcortical_RH_subthalamic_nucleus.nii.gz      | -0.97       | -2.52e-04       | -7.62e-04       | 2.58e-04        | .407        | 4.40e-05        | 6.63e-03        |
| MNI_PD25_subcortical_RH_thalamus.nii.gz                 | 1.29        | 1.91e-04        | -9.84e-05       | 4.81e-04        | .215        | 7.86e-05        | 8.86e-03        |
| Thalamic_DBS_Connectivity_atlas_LH_Dentate.nii.gz       | 0.68        | 8.85e-05        | -1.67e-04       | 3.44e-04        | .684        | 2.16e-05        | 4.65e-03        |
| Thalamic_DBS_Connectivity_atlas_RH_Dentate.nii.gz       | 0.34        | 4.30e-05        | -2.04e-04       | 2.90e-04        | .806        | 5.45e-06        | 2.33e-03        |
| Thomas_Atlas_LH_AV.nii.gz                               | 1.71        | 5.70e-04        | -8.24e-05       | 1.22e-03        | .096        | 1.37e-04        | 1.17e-02        |
| Thomas_Atlas_LH_CM.nii.gz                               | 1.51        | 2.12e-04        | -6.37e-05       | 4.89e-04        | .181        | 1.07e-04        | 1.03e-02        |
| <b>Thomas_Atlas_LH_Hb.nii.gz</b>                        | <b>2.39</b> | <b>8.79e-04</b> | <b>1.59e-04</b> | <b>1.60e-03</b> | <b>.026</b> | <b>2.68e-04</b> | <b>1.64e-02</b> |
| Thomas_Atlas_LH_LGN.nii.gz                              | 0.58        | 9.08e-05        | -2.16e-04       | 3.98e-04        | .687        | 1.57e-05        | 3.97e-03        |
| <b>Thomas_Atlas_LH_MD-Pf.nii.gz</b>                     | <b>2.36</b> | <b>4.40e-04</b> | <b>7.40e-05</b> | <b>8.05e-04</b> | <b>.029</b> | <b>2.60e-04</b> | <b>1.61e-02</b> |
| Thomas_Atlas_LH_MGN.nii.gz                              | -0.04       | -8.93e-06       | -4.21e-04       | 4.03e-04        | 1.00        | 8.47e-08        | 2.91e-04        |
| Thomas_Atlas_LH_MTT.nii.gz                              | -0.48       | -1.05e-04       | -5.35e-04       | 3.26e-04        | .698        | 1.06e-05        | 3.26e-03        |
| Thomas_Atlas_LH_Pul.nii.gz                              | 1.24        | 2.01e-04        | -1.17e-04       | 5.18e-04        | .237        | 7.19e-05        | 8.48e-03        |

**Table S16**

***ET\_PRS Lead\_DBS Extended Associations with grey matter diffusion magnetic resonance imaging (dMRI) – Radial Diffusivity (RD)***

| Tract                            | <i>t</i>    | $\beta$         | CI_low          | CI_up           | <i>p</i>    | Eta2            | Cohens_f        |
|----------------------------------|-------------|-----------------|-----------------|-----------------|-------------|-----------------|-----------------|
| Thomas_Atlas_LH_THALAMUS.nii.gz  | 1.65        | 2.33e-04        | -4.35e-05       | 5.10e-04        | .125        | 1.28e-04        | 1.13e-02        |
| Thomas_Atlas_LH_VA.nii.gz        | 0.06        | 1.10e-05        | -3.21e-04       | 3.43e-04        | 1.00        | 1.97e-07        | 4.44e-04        |
| Thomas_Atlas_LH_VLa.nii.gz       | 0.16        | 2.58e-05        | -2.95e-04       | 3.47e-04        | 1.00        | 1.16e-06        | 1.08e-03        |
| Thomas_Atlas_LH_VLP.nii.gz       | 1.19        | 1.47e-04        | -9.51e-05       | 3.89e-04        | .368        | 6.64e-05        | 8.15e-03        |
| Thomas_Atlas_LH_VLPd.nii.gz      | 1.07        | 1.38e-04        | -1.15e-04       | 3.92e-04        | .391        | 5.37e-05        | 7.33e-03        |
| Thomas_Atlas_LH_VLPv.nii.gz      | 1.18        | 1.62e-04        | -1.07e-04       | 4.32e-04        | .435        | 6.54e-05        | 8.09e-03        |
| Thomas_Atlas_LH_VPL.nii.gz       | 1.51        | 1.89e-04        | -5.64e-05       | 4.34e-04        | .241        | 1.07e-04        | 1.03e-02        |
| Thomas_Atlas_RH_AV.nii.gz        | 1.06        | 3.49e-04        | -2.98e-04       | 9.96e-04        | .320        | 5.23e-05        | 7.23e-03        |
| Thomas_Atlas_RH_CM.nii.gz        | 1.39        | 2.05e-04        | -8.46e-05       | 4.95e-04        | .293        | 9.03e-05        | 9.50e-03        |
| <b>Thomas_Atlas_RH_Hb.nii.gz</b> | <b>2.12</b> | <b>7.30e-04</b> | <b>5.50e-05</b> | <b>1.41e-03</b> | <b>.047</b> | <b>2.11e-04</b> | <b>1.45e-02</b> |
| Thomas_Atlas_RH_LGN.nii.gz       | 0.96        | 1.56e-04        | -1.62e-04       | 4.74e-04        | .463        | 4.33e-05        | 6.58e-03        |
| Thomas_Atlas_RH_MD-Pf.nii.gz     | 1.69        | 3.28e-04        | -5.16e-05       | 7.07e-04        | .099        | 1.34e-04        | 1.16e-02        |
| Thomas_Atlas_RH_MGN.nii.gz       | 0.82        | 1.64e-04        | -2.30e-04       | 5.59e-04        | .506        | 3.12e-05        | 5.59e-03        |
| Thomas_Atlas_RH_MTT.nii.gz       | -0.45       | -1.02e-04       | -5.46e-04       | 3.43e-04        | .800        | 9.39e-06        | 3.06e-03        |
| Thomas_Atlas_RH_Pul.nii.gz       | 1.29        | 2.12e-04        | -1.10e-04       | 5.34e-04        | .270        | 7.83e-05        | 8.85e-03        |
| Thomas_Atlas_RH_THALAMUS.nii.gz  | 1.34        | 1.94e-04        | -9.01e-05       | 4.77e-04        | .199        | 8.38e-05        | 9.16e-03        |
| Thomas_Atlas_RH_VA.nii.gz        | -0.15       | -2.65e-05       | -3.62e-04       | 3.09e-04        | .965        | 1.12e-06        | 1.06e-03        |
| Thomas_Atlas_RH_VLa.nii.gz       | 0.25        | 4.43e-05        | -3.06e-04       | 3.94e-04        | .983        | 2.88e-06        | 1.70e-03        |
| Thomas_Atlas_RH_VLP.nii.gz       | 0.88        | 1.13e-04        | -1.39e-04       | 3.64e-04        | .466        | 3.60e-05        | 6.00e-03        |
| Thomas_Atlas_RH_VLPd.nii.gz      | 1.01        | 1.35e-04        | -1.28e-04       | 3.98e-04        | .384        | 4.75e-05        | 6.89e-03        |
| Thomas_Atlas_RH_VLPv.nii.gz      | 0.55        | 7.94e-05        | -2.02e-04       | 3.61e-04        | .709        | 1.43e-05        | 3.78e-03        |
| Thomas_Atlas_RH_VPL.nii.gz       | 0.65        | 8.33e-05        | -1.67e-04       | 3.33e-04        | .627        | 2.00e-05        | 4.48e-03        |

*Note*

\* *p* < .05, \*\* *p* < .01, \*\*\* *p* < .001, 95% CI(B)

Table S17

*ET\_PRS Lead\_DBs Extended Associations with grey matter diffusion magnetic resonance imaging (dMRI) – Axial Diffusivity (AD)*

| Tract                                                    | <i>t</i> | $\beta$   | CI_low    | CI_up    | <i>p</i> | Eta2     | Cohens_f |
|----------------------------------------------------------|----------|-----------|-----------|----------|----------|----------|----------|
| AHEAD_Atlas_GPe_L.nii.gz                                 | 0.30     | 1.85e-05  | -1.02e-04 | 1.39e-04 | .964     | 4.25e-06 | 2.06e-03 |
| AHEAD_Atlas_GPe_R_mask.nii.gz                            | -0.15    | -9.47e-06 | -1.31e-04 | 1.12e-04 | .967     | 1.09e-06 | 1.04e-03 |
| AHEAD_Atlas_GPi_L_mask.nii.gz                            | -0.22    | -1.51e-05 | -1.50e-04 | 1.20e-04 | .909     | 2.26e-06 | 1.50e-03 |
| AHEAD_Atlas_GPi_R_mask.nii.gz                            | -0.33    | -2.27e-05 | -1.59e-04 | 1.14e-04 | .818     | 5.00e-06 | 2.24e-03 |
| AHEAD_Atlas_RN_L_mask.nii.gz                             | -0.98    | -7.88e-05 | -2.37e-04 | 7.95e-05 | .453     | 4.47e-05 | 6.68e-03 |
| AHEAD_Atlas_RN_R_mask.nii.gz                             | -0.58    | -4.80e-05 | -2.10e-04 | 1.14e-04 | .687     | 1.58e-05 | 3.97e-03 |
| AHEAD_Atlas_SN_L_mask.nii.gz                             | -0.82    | -7.00e-05 | -2.38e-04 | 9.80e-05 | .506     | 3.13e-05 | 5.59e-03 |
| AHEAD_Atlas_SN_R_mask.nii.gz                             | -1.37    | -1.14e-04 | -2.77e-04 | 4.93e-05 | .314     | 8.78e-05 | 9.37e-03 |
| AHEAD_Atlas_STN_L_mask.nii.gz                            | -1.03    | -9.68e-05 | -2.82e-04 | 8.82e-05 | .480     | 4.93e-05 | 7.02e-03 |
| AHEAD_Atlas_STN_R_mask.nii.gz                            | -1.19    | -1.17e-04 | -3.10e-04 | 7.63e-05 | .406     | 6.60e-05 | 8.13e-03 |
| Atlas_Basal_Ganglia_and_Thalamus_all_histo_labels.nii.gz | 0.87     | 5.39e-05  | -6.78e-05 | 1.76e-04 | .440     | 3.53e-05 | 5.94e-03 |
| Atlas_Basal_Ganglia_and_Thalamus_L_Acc.nii.gz            | -0.17    | -1.25e-05 | -1.57e-04 | 1.32e-04 | .952     | 1.35e-06 | 1.16e-03 |
| Atlas_Basal_Ganglia_and_Thalamus_L_Cauda.nii.gz          | 0.44     | 3.35e-05  | -1.16e-04 | 1.83e-04 | .728     | 8.99e-06 | 3.00e-03 |
| Atlas_Basal_Ganglia_and_Thalamus_L_Cauda.nii.gz          | 0.82     | 7.94e-05  | -1.10e-04 | 2.69e-04 | .453     | 3.17e-05 | 5.63e-03 |
| Atlas_Basal_Ganglia_and_Thalamus_L_Cauda.nii.gz          | 1.32     | 1.72e-04  | -8.29e-05 | 4.28e-04 | .204     | 8.22e-05 | 9.07e-03 |
| Atlas_Basal_Ganglia_and_Thalamus_L_Cauda.nii.gz          | 1.39     | 1.61e-04  | -6.62e-05 | 3.88e-04 | .202     | 9.04e-05 | 9.51e-03 |
| Atlas_Basal_Ganglia_and_Thalamus_L_GPe.nii.gz            | -0.33    | -2.20e-05 | -1.52e-04 | 1.08e-04 | .906     | 5.11e-06 | 2.26e-03 |
| Atlas_Basal_Ganglia_and_Thalamus_L_GPi.nii.gz            | -0.86    | -5.69e-05 | -1.87e-04 | 7.28e-05 | .612     | 3.47e-05 | 5.89e-03 |

Table S17

*ET\_PRS Lead\_DBs Extended Associations with grey matter diffusion magnetic resonance imaging (dMRI) – Axial Diffusivity (AD)*

| Tract                                                        | <i>t</i>    | $\beta$         | CI_low          | CI_up           | <i>p</i>    | Eta2            | Cohens_f        |
|--------------------------------------------------------------|-------------|-----------------|-----------------|-----------------|-------------|-----------------|-----------------|
| Atlas_Basal_Ganglia_and_Thalamus_L_Put-<br>ia.nii.gz         | 0.13        | 7.88e-06        | -1.12e-04       | 1.28e-04        | .988        | 7.75e-07        | 8.80e-04        |
| Atlas_Basal_Ganglia_and_Thalamus_L_Put-<br>im.nii.gz         | 0.05        | 2.86e-06        | -1.09e-04       | 1.15e-04        | 1.00        | 1.18e-07        | 3.43e-04        |
| Atlas_Basal_Ganglia_and_Thalamus_L_Put-<br>sa.nii.gz         | 0.83        | 4.70e-05        | -6.40e-05       | 1.58e-04        | .447        | 3.24e-05        | 5.69e-03        |
| Atlas_Basal_Ganglia_and_Thalamus_L_Put-<br>sm.nii.gz         | 1.14        | 6.34e-05        | -4.53e-05       | 1.72e-04        | .309        | 6.13e-05        | 7.83e-03        |
| Atlas_Basal_Ganglia_and_Thalamus_L_Put-<br>sp.nii.gz         | -0.11       | -6.53e-06       | -1.25e-04       | 1.12e-04        | 1.00        | 5.44e-07        | 7.38e-04        |
| Atlas_Basal_Ganglia_and_Thalamus_L_SN.nii.gz                 | -0.83       | -7.32e-05       | -2.46e-04       | 9.98e-05        | .653        | 3.23e-05        | 5.68e-03        |
| Atlas_Basal_Ganglia_and_Thalamus_L_STN.nii.gz                | -0.66       | -6.07e-05       | -2.42e-04       | 1.20e-04        | .703        | 2.03e-05        | 4.50e-03        |
| Atlas_Basal_Ganglia_and_Thalamus_L_Tha-<br>a.nii.gz          | 0.83        | 6.35e-05        | -8.73e-05       | 2.14e-04        | .450        | 3.20e-05        | 5.65e-03        |
| Atlas_Basal_Ganglia_and_Thalamus_L_Tha-<br>ld.nii.gz         | 1.94        | 1.26e-04        | -1.56e-06       | 2.54e-04        | .073        | 1.76e-04        | 1.33e-02        |
| Atlas_Basal_Ganglia_and_Thalamus_L_Tha-<br>lp.nii.gz         | 1.71        | 1.09e-04        | -1.59e-05       | 2.34e-04        | .120        | 1.37e-04        | 1.17e-02        |
| Atlas_Basal_Ganglia_and_Thalamus_L_Tha-<br>lpu.nii.gz        | -0.01       | -4.50e-07       | -1.32e-04       | 1.31e-04        | 1.00        | 2.11e-09        | 4.59e-05        |
| <b>Atlas_Basal_Ganglia_and_Thalamus_L_Tha-<br/>md.nii.gz</b> | <b>2.21</b> | <b>2.25e-04</b> | <b>2.57e-05</b> | <b>4.24e-04</b> | <b>.042</b> | <b>2.30e-04</b> | <b>1.52e-02</b> |

**Table S17**

***ET\_PRS Lead\_DBS Extended Associations with grey matter diffusion magnetic resonance imaging (dMRI) – Axial Diffusivity (AD)***

| Tract                                             | <i>t</i> | $\beta$   | CI_low    | CI_up    | <i>p</i> | Eta2     | Cohens_f |
|---------------------------------------------------|----------|-----------|-----------|----------|----------|----------|----------|
| Atlas_Basal_Ganglia_and_Thalamus_L_Tha-mpu.nii.gz | 1.54     | 1.27e-04  | -3.44e-05 | 2.89e-04 | .150     | 1.12e-04 | 1.06e-02 |
| Atlas_Basal_Ganglia_and_Thalamus_L_Tha-mp.nii.gz  | 0.47     | 2.82e-05  | -8.94e-05 | 1.46e-04 | .702     | 1.04e-05 | 3.22e-03 |
| Atlas_Basal_Ganglia_and_Thalamus_R_Acc.nii.gz     | -0.58    | -4.36e-05 | -1.90e-04 | 1.03e-04 | .617     | 1.59e-05 | 3.99e-03 |
| Atlas_Basal_Ganglia_and_Thalamus_R_Cau-ia.nii.gz  | -0.25    | -2.16e-05 | -1.90e-04 | 1.47e-04 | .881     | 2.97e-06 | 1.72e-03 |
| Atlas_Basal_Ganglia_and_Thalamus_R_Cau-im.nii.gz  | 0.42     | 3.95e-05  | -1.46e-04 | 2.25e-04 | .744     | 8.19e-06 | 2.86e-03 |
| Atlas_Basal_Ganglia_and_Thalamus_R_Cau-sa.nii.gz  | 0.53     | 6.43e-05  | -1.74e-04 | 3.03e-04 | .657     | 1.31e-05 | 3.62e-03 |
| Atlas_Basal_Ganglia_and_Thalamus_R_Cau-sp.nii.gz  | 1.13     | 1.25e-04  | -9.18e-05 | 3.41e-04 | .285     | 5.97e-05 | 7.73e-03 |
| Atlas_Basal_Ganglia_and_Thalamus_R_GPe.nii.gz     | 0.29     | 1.94e-05  | -1.11e-04 | 1.50e-04 | .847     | 4.00e-06 | 2.00e-03 |
| Atlas_Basal_Ganglia_and_Thalamus_R_GPii.nii.gz    | -0.76    | -5.11e-05 | -1.83e-04 | 8.12e-05 | .549     | 2.69e-05 | 5.19e-03 |
| Atlas_Basal_Ganglia_and_Thalamus_R_Put-ia.nii.gz  | -0.48    | -3.02e-05 | -1.53e-04 | 9.28e-05 | .693     | 1.09e-05 | 3.30e-03 |
| Atlas_Basal_Ganglia_and_Thalamus_R_Put-im.nii.gz  | 0.17     | 9.31e-06  | -9.97e-05 | 1.18e-04 | .954     | 1.32e-06 | 1.15e-03 |
| Atlas_Basal_Ganglia_and_Thalamus_R_Put-sa.nii.gz  | 0.91     | 5.09e-05  | -5.83e-05 | 1.60e-04 | .404     | 3.91e-05 | 6.26e-03 |
| Atlas_Basal_Ganglia_and_Thalamus_R_Put-sm.nii.gz  | 1.23     | 6.69e-05  | -3.94e-05 | 1.73e-04 | .239     | 7.14e-05 | 8.45e-03 |

Table S17

*ET\_PRS Lead\_DBs Extended Associations with grey matter diffusion magnetic resonance imaging (dMRI) – Axial Diffusivity (AD)*

| Tract                                             | <i>t</i>    | $\beta$         | CI_low          | CI_up           | <i>p</i>    | Eta2            | Cohens_f        |
|---------------------------------------------------|-------------|-----------------|-----------------|-----------------|-------------|-----------------|-----------------|
| Atlas_Basal_Ganglia_and_Thalamus_R_Put-sp.nii.gz  | 0.64        | 3.69e-05        | -7.59e-05       | 1.50e-04        | .574        | 1.93e-05        | 4.39e-03        |
| Atlas_Basal_Ganglia_and_Thalamus_R_SN.nii.gz      | -1.84       | -1.67e-04       | -3.44e-04       | 1.07e-05        | .120        | 1.59e-04        | 1.26e-02        |
| Atlas_Basal_Ganglia_and_Thalamus_R_STN.nii.gz     | -0.85       | -8.25e-05       | -2.73e-04       | 1.08e-04        | .489        | 3.36e-05        | 5.80e-03        |
| Atlas_Basal_Ganglia_and_Thalamus_R_Tha-a.nii.gz   | 0.32        | 2.18e-05        | -1.13e-04       | 1.56e-04        | .826        | 4.73e-06        | 2.18e-03        |
| Atlas_Basal_Ganglia_and_Thalamus_R_Tha-ld.nii.gz  | 1.44        | 9.32e-05        | -3.39e-05       | 2.20e-04        | .166        | 9.69e-05        | 9.85e-03        |
| Atlas_Basal_Ganglia_and_Thalamus_R_Tha-lp.nii.gz  | 1.22        | 6.65e-05        | -4.07e-05       | 1.74e-04        | .274        | 6.93e-05        | 8.32e-03        |
| Atlas_Basal_Ganglia_and_Thalamus_R_Tha-lpu.nii.gz | 1.18        | 8.37e-05        | -5.54e-05       | 2.23e-04        | .291        | 6.52e-05        | 8.08e-03        |
| Atlas_Basal_Ganglia_and_Thalamus_R_Tha-md.nii.gz  | 0.86        | 6.03e-05        | -7.72e-05       | 1.98e-04        | .477        | 3.46e-05        | 5.89e-03        |
| Atlas_Basal_Ganglia_and_Thalamus_R_Tha-mpu.nii.gz | 1.60        | 1.46e-04        | -3.28e-05       | 3.25e-04        | .120        | 1.20e-04        | 1.10e-02        |
| Atlas_Basal_Ganglia_and_Thalamus_R_Tha-vp.nii.gz  | -0.09       | -5.81e-06       | -1.27e-04       | 1.15e-04        | 1.00        | 4.16e-07        | 6.45e-04        |
| DISTAL_L_1.nii.gz                                 | 0.89        | 5.49e-05        | -6.56e-05       | 1.75e-04        | .409        | 3.74e-05        | 6.11e-03        |
| DISTAL_L_100.nii.gz                               | 1.73        | 1.38e-04        | -1.84e-05       | 2.95e-04        | .092        | 1.40e-04        | 1.18e-02        |
| <b>DISTAL_L_101.nii.gz</b>                        | <b>2.44</b> | <b>1.91e-04</b> | <b>3.75e-05</b> | <b>3.44e-04</b> | <b>.023</b> | <b>2.79e-04</b> | <b>1.67e-02</b> |
| DISTAL_L_105.nii.gz                               | 1.27        | 1.18e-04        | -6.47e-05       | 3.01e-04        | .261        | 7.53e-05        | 8.68e-03        |
| DISTAL_L_106.nii.gz                               | 0.98        | 8.13e-05        | -8.12e-05       | 2.44e-04        | .400        | 4.51e-05        | 6.71e-03        |

Table S17

*ET\_PRS Lead\_DBs Extended Associations with grey matter diffusion magnetic resonance imaging (dMRI) – Axial Diffusivity (AD)*

| Tract                     | <i>t</i>    | $\beta$         | CI_low          | CI_up           | <i>p</i>    | Eta2            | Cohens_f        |
|---------------------------|-------------|-----------------|-----------------|-----------------|-------------|-----------------|-----------------|
| DISTAL_L_107.nii.gz       | 0.26        | 1.72e-05        | -1.15e-04       | 1.49e-04        | .877        | 3.08e-06        | 1.76e-03        |
| DISTAL_L_108.nii.gz       | 0.54        | 5.32e-05        | -1.40e-04       | 2.46e-04        | .811        | 1.37e-05        | 3.69e-03        |
| DISTAL_L_109.nii.gz       | 1.54        | 1.97e-04        | -5.36e-05       | 4.48e-04        | .271        | 1.11e-04        | 1.06e-02        |
| DISTAL_L_110.nii.gz       | 0.08        | 4.11e-06        | -1.02e-04       | 1.10e-04        | 1.00        | 2.73e-07        | 5.22e-04        |
| DISTAL_L_111.nii.gz       | 1.31        | 9.26e-05        | -4.62e-05       | 2.31e-04        | .263        | 8.02e-05        | 8.96e-03        |
| DISTAL_L_112.nii.gz       | 0.87        | 5.02e-05        | -6.31e-05       | 1.64e-04        | .470        | 3.54e-05        | 5.95e-03        |
| DISTAL_L_118.nii.gz       | 0.40        | 2.70e-05        | -1.06e-04       | 1.60e-04        | .843        | 7.46e-06        | 2.73e-03        |
| DISTAL_L_14.nii.gz        | -0.68       | -4.27e-05       | -1.66e-04       | 8.03e-05        | .682        | 2.17e-05        | 4.66e-03        |
| DISTAL_L_16.nii.gz        | 1.21        | 2.20e-04        | -1.37e-04       | 5.76e-04        | .267        | 6.83e-05        | 8.27e-03        |
| DISTAL_L_2.nii.gz         | 0.50        | 2.71e-05        | -7.97e-05       | 1.34e-04        | .681        | 1.16e-05        | 3.40e-03        |
| DISTAL_L_24.nii.gz        | -0.66       | -5.29e-05       | -2.11e-04       | 1.05e-04        | .626        | 2.01e-05        | 4.49e-03        |
| DISTAL_L_26.nii.gz        | -0.11       | -7.02e-06       | -1.37e-04       | 1.23e-04        | 1.00        | 5.25e-07        | 7.24e-04        |
| DISTAL_L_28.nii.gz        | 1.29        | 1.88e-04        | -9.73e-05       | 4.73e-04        | .241        | 7.82e-05        | 8.84e-03        |
| DISTAL_L_29.nii.gz        | 0.69        | 1.00e-04        | -1.82e-04       | 3.83e-04        | .670        | 2.26e-05        | 4.76e-03        |
| <b>DISTAL_L_35.nii.gz</b> | <b>2.33</b> | <b>3.64e-04</b> | <b>5.83e-05</b> | <b>6.69e-04</b> | <b>.027</b> | <b>2.56e-04</b> | <b>1.60e-02</b> |
| DISTAL_L_36.nii.gz        | 0.17        | 9.27e-06        | -9.82e-05       | 1.17e-04        | 1.00        | 1.34e-06        | 1.16e-03        |
| <b>DISTAL_L_37.nii.gz</b> | <b>2.65</b> | <b>2.59e-04</b> | <b>6.74e-05</b> | <b>4.51e-04</b> | <b>.013</b> | <b>3.29e-04</b> | <b>1.81e-02</b> |
| DISTAL_L_4.nii.gz         | 0.77        | 4.59e-05        | -7.03e-05       | 1.62e-04        | .508        | 2.82e-05        | 5.31e-03        |
| DISTAL_L_40.nii.gz        | -0.05       | -4.25e-06       | -1.79e-04       | 1.71e-04        | 1.00        | 1.06e-07        | 3.26e-04        |
| DISTAL_L_47.nii.gz        | -0.89       | -7.85e-05       | -2.52e-04       | 9.47e-05        | .588        | 3.70e-05        | 6.08e-03        |
| DISTAL_L_49.nii.gz        | 0.62        | 3.82e-05        | -8.25e-05       | 1.59e-04        | .654        | 1.80e-05        | 4.25e-03        |
| DISTAL_L_6.nii.gz         | -0.83       | -4.79e-05       | -1.62e-04       | 6.57e-05        | .450        | 3.20e-05        | 5.66e-03        |
| DISTAL_L_60.nii.gz        | 0.55        | 3.58e-05        | -9.16e-05       | 1.63e-04        | .914        | 1.42e-05        | 3.77e-03        |



Table S17

*ET\_PRS Lead\_DBs Extended Associations with grey matter diffusion magnetic resonance imaging (dMRI) – Axial**Diffusivity (AD)*

| Tract                            | <i>t</i>    | $\beta$         | CI_low          | CI_up           | <i>p</i>    | Eta2            | Cohens_f        |
|----------------------------------|-------------|-----------------|-----------------|-----------------|-------------|-----------------|-----------------|
| DISTAL_L_63.nii.gz               | -0.20       | -2.28e-05       | -2.46e-04       | 2.01e-04        | .925        | 1.88e-06        | 1.37e-03        |
| DISTAL_L_68.nii.gz               | -0.14       | -1.31e-05       | -1.95e-04       | 1.69e-04        | .977        | 9.30e-07        | 9.64e-04        |
| DISTAL_L_7.nii.gz                | 1.09        | 1.11e-04        | -8.82e-05       | 3.10e-04        | .504        | 5.59e-05        | 7.48e-03        |
| DISTAL_L_70.nii.gz               | -0.10       | -8.72e-06       | -1.78e-04       | 1.61e-04        | 1.00        | 4.76e-07        | 6.90e-04        |
| DISTAL_L_76.nii.gz               | 0.67        | 4.98e-05        | -9.57e-05       | 1.95e-04        | .690        | 2.11e-05        | 4.60e-03        |
| DISTAL_L_8.nii.gz                | -0.79       | -4.79e-05       | -1.66e-04       | 7.02e-05        | .470        | 2.96e-05        | 5.44e-03        |
| DISTAL_L_86.nii.gz               | 0.59        | 4.18e-05        | -9.67e-05       | 1.80e-04        | .693        | 1.64e-05        | 4.06e-03        |
| DISTAL_L_87.nii.gz               | 0.61        | 4.25e-05        | -9.37e-05       | 1.79e-04        | .753        | 1.75e-05        | 4.19e-03        |
| DISTAL_L_89.nii.gz               | -0.34       | -2.46e-05       | -1.69e-04       | 1.19e-04        | .901        | 5.28e-06        | 2.30e-03        |
| DISTAL_L_91.nii.gz               | 1.09        | 7.05e-05        | -5.65e-05       | 1.97e-04        | .338        | 5.56e-05        | 7.45e-03        |
| DISTAL_L_92.nii.gz               | 1.04        | 5.75e-05        | -5.07e-05       | 1.66e-04        | .328        | 5.08e-05        | 7.13e-03        |
| DISTAL_L_93.nii.gz               | 1.31        | 7.91e-05        | -3.89e-05       | 1.97e-04        | .260        | 8.10e-05        | 9.00e-03        |
| DISTAL_L_94.nii.gz               | 0.39        | 2.38e-05        | -9.55e-05       | 1.43e-04        | .842        | 7.19e-06        | 2.68e-03        |
| DISTAL_L_97.nii.gz               | 0.43        | 2.58e-05        | -9.20e-05       | 1.44e-04        | .918        | 8.64e-06        | 2.94e-03        |
| <b>DISTAL_L_98.nii.gz</b>        | <b>2.23</b> | <b>1.31e-04</b> | <b>1.58e-05</b> | <b>2.46e-04</b> | <b>.041</b> | <b>2.33e-04</b> | <b>1.53e-02</b> |
| DISTAL_L_GPe.nii.gz              | -0.12       | -8.63e-06       | -1.53e-04       | 1.36e-04        | 1.00        | 6.41e-07        | 8.01e-04        |
| DISTAL_L_GPi_sensorimotor.nii.gz | -0.40       | -2.37e-05       | -1.39e-04       | 9.20e-05        | .946        | 7.56e-06        | 2.75e-03        |
| DISTAL_L_GPi.nii.gz              | -0.39       | -3.14e-05       | -1.89e-04       | 1.26e-04        | .773        | 7.16e-06        | 2.68e-03        |
| DISTAL_L_RN.nii.gz               | -0.82       | -6.75e-05       | -2.28e-04       | 9.33e-05        | .645        | 3.18e-05        | 5.64e-03        |
| DISTAL_L_STN_associative.nii.gz  | -1.01       | -1.09e-04       | -3.21e-04       | 1.02e-04        | .428        | 4.81e-05        | 6.94e-03        |
| DISTAL_L_STN_limbic.nii.gz       | -0.71       | -8.39e-05       | -3.14e-04       | 1.47e-04        | .654        | 2.39e-05        | 4.89e-03        |
| DISTAL_L_STN_motor.nii.gz        | -1.05       | -9.51e-05       | -2.73e-04       | 8.31e-05        | .447        | 5.13e-05        | 7.16e-03        |
| DISTAL_L_STN.nii.gz              | -1.13       | -1.17e-04       | -3.19e-04       | 8.52e-05        | .461        | 6.03e-05        | 7.77e-03        |

Table S17

*ET\_PRS Lead\_DBS Extended Associations with grey matter diffusion magnetic resonance imaging (dMRI) – Axial Diffusivity (AD)*

| Tract               | <i>t</i> | $\beta$   | CI_low    | CI_up    | <i>p</i> | Eta2     | Cohens_f |
|---------------------|----------|-----------|-----------|----------|----------|----------|----------|
| DISTAL_R_1.nii.gz   | 0.68     | 4.49e-05  | -8.47e-05 | 1.75e-04 | .547     | 2.17e-05 | 4.65e-03 |
| DISTAL_R_100.nii.gz | 1.67     | 1.24e-04  | -2.16e-05 | 2.70e-04 | .116     | 1.31e-04 | 1.14e-02 |
| DISTAL_R_101.nii.gz | 1.85     | 1.35e-04  | -7.72e-06 | 2.78e-04 | .088     | 1.61e-04 | 1.27e-02 |
| DISTAL_R_105.nii.gz | 0.71     | 7.23e-05  | -1.28e-04 | 2.73e-04 | .527     | 2.35e-05 | 4.85e-03 |
| DISTAL_R_106.nii.gz | 0.80     | 6.69e-05  | -9.66e-05 | 2.30e-04 | .581     | 3.02e-05 | 5.49e-03 |
| DISTAL_R_107.nii.gz | 0.37     | 2.62e-05  | -1.13e-04 | 1.65e-04 | .871     | 6.37e-06 | 2.52e-03 |
| DISTAL_R_108.nii.gz | 0.35     | 3.46e-05  | -1.62e-04 | 2.31e-04 | 1.00     | 5.60e-06 | 2.37e-03 |
| DISTAL_R_109.nii.gz | 1.59     | 2.04e-04  | -4.75e-05 | 4.55e-04 | .246     | 1.19e-04 | 1.09e-02 |
| DISTAL_R_110.nii.gz | 0.16     | 8.81e-06  | -9.59e-05 | 1.13e-04 | .956     | 1.28e-06 | 1.13e-03 |
| DISTAL_R_111.nii.gz | 1.71     | 1.41e-04  | -2.02e-05 | 3.02e-04 | .106     | 1.38e-04 | 1.17e-02 |
| DISTAL_R_112.nii.gz | 0.80     | 4.64e-05  | -6.80e-05 | 1.61e-04 | .577     | 2.97e-05 | 5.45e-03 |
| DISTAL_R_118.nii.gz | -0.29    | -2.03e-05 | -1.58e-04 | 1.17e-04 | .850     | 3.91e-06 | 1.98e-03 |
| DISTAL_R_13.nii.gz  | -1.02    | -1.20e-04 | -3.51e-04 | 1.11e-04 | .485     | 4.87e-05 | 6.98e-03 |
| DISTAL_R_14.nii.gz  | -1.12    | -6.97e-05 | -1.91e-04 | 5.18e-05 | .319     | 5.93e-05 | 7.70e-03 |
| DISTAL_R_16.nii.gz  | 1.67     | 2.86e-04  | -5.01e-05 | 6.22e-04 | .150     | 1.30e-04 | 1.14e-02 |
| DISTAL_R_2.nii.gz   | 0.10     | 5.07e-06  | -9.73e-05 | 1.07e-04 | 1.00     | 4.42e-07 | 6.65e-04 |
| DISTAL_R_24.nii.gz  | -0.36    | -2.69e-05 | -1.74e-04 | 1.21e-04 | .920     | 5.98e-06 | 2.45e-03 |
| DISTAL_R_26.nii.gz  | 0.30     | 2.03e-05  | -1.11e-04 | 1.52e-04 | .839     | 4.28e-06 | 2.07e-03 |
| DISTAL_R_28.nii.gz  | 1.04     | 1.50e-04  | -1.34e-04 | 4.34e-04 | .330     | 5.03e-05 | 7.10e-03 |
| DISTAL_R_29.nii.gz  | 0.43     | 6.11e-05  | -2.18e-04 | 3.40e-04 | .735     | 8.63e-06 | 2.94e-03 |
| DISTAL_R_35.nii.gz  | 1.38     | 2.10e-04  | -8.76e-05 | 5.08e-04 | .203     | 8.98e-05 | 9.48e-03 |
| DISTAL_R_36.nii.gz  | 0.87     | 4.96e-05  | -6.18e-05 | 1.61e-04 | .421     | 3.57e-05 | 5.98e-03 |
| DISTAL_R_37.nii.gz  | 1.61     | 1.59e-04  | -3.45e-05 | 3.53e-04 | .131     | 1.22e-04 | 1.10e-02 |

Table S17

*ET\_PRS Lead\_DBS Extended Associations with grey matter diffusion magnetic resonance imaging (dMRI) – Axial Diffusivity (AD)*

| Tract                            | <i>t</i> | $\beta$   | CI_low    | CI_up    | <i>p</i> | Eta2     | Cohens_f |
|----------------------------------|----------|-----------|-----------|----------|----------|----------|----------|
| DISTAL_R_4.nii.gz                | 0.86     | 5.14e-05  | -6.57e-05 | 1.68e-04 | .429     | 3.47e-05 | 5.89e-03 |
| DISTAL_R_40.nii.gz               | -1.11    | -1.02e-04 | -2.82e-04 | 7.85e-05 | .369     | 5.75e-05 | 7.59e-03 |
| DISTAL_R_47.nii.gz               | -1.51    | -1.28e-04 | -2.95e-04 | 3.85e-05 | .207     | 1.07e-04 | 1.03e-02 |
| DISTAL_R_49.nii.gz               | 0.79     | 4.91e-05  | -7.30e-05 | 1.71e-04 | .526     | 2.92e-05 | 5.40e-03 |
| DISTAL_R_6.nii.gz                | -0.55    | -3.16e-05 | -1.43e-04 | 8.02e-05 | .638     | 1.44e-05 | 3.79e-03 |
| DISTAL_R_60.nii.gz               | 0.78     | 5.29e-05  | -8.05e-05 | 1.86e-04 | .534     | 2.84e-05 | 5.33e-03 |
| DISTAL_R_63.nii.gz               | -0.11    | -1.21e-05 | -2.20e-04 | 1.96e-04 | 1.00     | 6.12e-07 | 7.83e-04 |
| DISTAL_R_68.nii.gz               | -0.32    | -3.09e-05 | -2.18e-04 | 1.56e-04 | .821     | 4.90e-06 | 2.21e-03 |
| DISTAL_R_7.nii.gz                | 0.60     | 6.24e-05  | -1.41e-04 | 2.66e-04 | .753     | 1.70e-05 | 4.12e-03 |
| DISTAL_R_70.nii.gz               | 0.40     | 3.11e-05  | -1.21e-04 | 1.83e-04 | .757     | 7.57e-06 | 2.75e-03 |
| DISTAL_R_76.nii.gz               | 1.63     | 1.11e-04  | -2.22e-05 | 2.43e-04 | .161     | 1.25e-04 | 1.12e-02 |
| DISTAL_R_8.nii.gz                | -0.83    | -4.80e-05 | -1.62e-04 | 6.57e-05 | .499     | 3.21e-05 | 5.66e-03 |
| DISTAL_R_86.nii.gz               | 0.60     | 4.54e-05  | -1.03e-04 | 1.94e-04 | .670     | 1.69e-05 | 4.11e-03 |
| DISTAL_R_87.nii.gz               | 0.51     | 3.74e-05  | -1.06e-04 | 1.81e-04 | .744     | 1.23e-05 | 3.51e-03 |
| DISTAL_R_89.nii.gz               | 0.26     | 1.97e-05  | -1.26e-04 | 1.66e-04 | .871     | 3.28e-06 | 1.81e-03 |
| DISTAL_R_91.nii.gz               | 0.42     | 2.77e-05  | -1.03e-04 | 1.58e-04 | .827     | 8.15e-06 | 2.85e-03 |
| DISTAL_R_92.nii.gz               | 0.50     | 2.86e-05  | -8.29e-05 | 1.40e-04 | .676     | 1.19e-05 | 3.45e-03 |
| DISTAL_R_93.nii.gz               | 1.19     | 7.41e-05  | -4.82e-05 | 1.96e-04 | .259     | 6.61e-05 | 8.13e-03 |
| DISTAL_R_94.nii.gz               | -0.24    | -1.46e-05 | -1.35e-04 | 1.06e-04 | .993     | 2.63e-06 | 1.62e-03 |
| DISTAL_R_97.nii.gz               | 0.50     | 3.01e-05  | -8.71e-05 | 1.47e-04 | .676     | 1.19e-05 | 3.45e-03 |
| DISTAL_R_GPe.nii.gz              | 0.31     | 2.23e-05  | -1.21e-04 | 1.66e-04 | .836     | 4.37e-06 | 2.09e-03 |
| DISTAL_R_GPi_sensorimotor.nii.gz | -1.02    | -6.13e-05 | -1.80e-04 | 5.70e-05 | .392     | 4.84e-05 | 6.96e-03 |
| DISTAL_R_GPi.nii.gz              | -0.59    | -4.80e-05 | -2.07e-04 | 1.11e-04 | .608     | 1.65e-05 | 4.07e-03 |

Table S17

*ET\_PRS Lead\_DBS Extended Associations with grey matter diffusion magnetic resonance imaging (dMRI) – Axial Diffusivity (AD)*

| Tract                                        | <i>t</i>     | $\beta$          | CI_low           | CI_up            | <i>p</i>    | Eta2            | Cohens_f        |
|----------------------------------------------|--------------|------------------|------------------|------------------|-------------|-----------------|-----------------|
| DISTAL_R_RN.nii.gz                           | -0.15        | -1.29e-05        | -1.81e-04        | 1.55e-04         | .968        | 1.07e-06        | 1.04e-03        |
| DISTAL_R_STN_associative.nii.gz              | -0.95        | -1.06e-04        | -3.24e-04        | 1.12e-04         | .537        | 4.24e-05        | 6.51e-03        |
| <b>DISTAL_R_STN_limbic.nii.gz</b>            | <b>-2.40</b> | <b>-2.80e-04</b> | <b>-5.09e-04</b> | <b>-5.13e-05</b> | <b>.045</b> | <b>2.70e-04</b> | <b>1.64e-02</b> |
| DISTAL_R_STN_motor.nii.gz                    | -1.07        | -1.05e-04        | -2.99e-04        | 8.82e-05         | .450        | 5.33e-05        | 7.30e-03        |
| DISTAL_R_STN.nii.gz                          | -1.14        | -1.22e-04        | -3.32e-04        | 8.72e-05         | .347        | 6.15e-05        | 7.84e-03        |
| Human_Motor_Thalamus_L_A.nii.gz              | 1.42         | 1.93e-04         | -7.43e-05        | 4.60e-04         | .192        | 9.40e-05        | 9.70e-03        |
| Human_Motor_Thalamus_L_acbcbssc.nii.gz       | -0.25        | -1.66e-05        | -1.49e-04        | 1.16e-04         | 1.00        | 2.83e-06        | 1.68e-03        |
| Human_Motor_Thalamus_L_alfrfxmtpc.nii.gz     | 1.72         | 1.75e-04         | -2.47e-05        | 3.74e-04         | .095        | 1.38e-04        | 1.18e-02        |
| Human_Motor_Thalamus_L_BasalForebrain.nii.gz | 0.29         | 2.22e-05         | -1.28e-04        | 1.72e-04         | .849        | 3.94e-06        | 1.99e-03        |
| Human_Motor_Thalamus_L_CdPutVSt.nii.gz       | 0.82         | 5.13e-05         | -7.10e-05        | 1.74e-04         | .452        | 3.17e-05        | 5.63e-03        |
| Human_Motor_Thalamus_L_CMPf.nii.gz           | 0.75         | 4.61e-05         | -7.47e-05        | 1.67e-04         | .555        | 2.63e-05        | 5.12e-03        |
| Human_Motor_Thalamus_L_eml.nii.gz            | 0.10         | 9.15e-06         | -1.62e-04        | 1.80e-04         | 1.00        | 5.17e-07        | 7.19e-04        |
| Human_Motor_Thalamus_L_GPl.nii.gz            | -0.22        | -1.46e-05        | -1.47e-04        | 1.18e-04         | .912        | 2.18e-06        | 1.48e-03        |
| Human_Motor_Thalamus_L_GPm.nii.gz            | -0.36        | -2.54e-05        | -1.64e-04        | 1.13e-04         | .791        | 6.05e-06        | 2.46e-03        |
| <b>Human_Motor_Thalamus_L_Hbl.nii.gz</b>     | <b>2.27</b>  | <b>4.33e-04</b>  | <b>5.88e-05</b>  | <b>8.07e-04</b>  | <b>.037</b> | <b>2.41e-04</b> | <b>1.55e-02</b> |
| Human_Motor_Thalamus_L_Hypothalamus.nii.gz   | 0.88         | 7.79e-05         | -9.49e-05        | 2.51e-04         | .519        | 3.66e-05        | 6.05e-03        |
| Human_Motor_Thalamus_L_ic.nii.gz             | 1.19         | 8.81e-05         | -5.73e-05        | 2.34e-04         | .418        | 6.62e-05        | 8.13e-03        |
| <b>Human_Motor_Thalamus_L_LD.nii.gz</b>      | <b>2.66</b>  | <b>4.50e-04</b>  | <b>1.19e-04</b>  | <b>7.82e-04</b>  | <b>.012</b> | <b>3.32e-04</b> | <b>1.82e-02</b> |
| Human_Motor_Thalamus_L_LG.nii.gz             | 0.57         | 4.41e-05         | -1.09e-04        | 1.97e-04         | .699        | 1.50e-05        | 3.87e-03        |
| Human_Motor_Thalamus_L_Li.nii.gz             | 0.83         | 5.78e-05         | -7.94e-05        | 1.95e-04         | .450        | 3.20e-05        | 5.65e-03        |
| Human_Motor_Thalamus_L_M.nii.gz              | 0.20         | 1.89e-05         | -1.65e-04        | 2.02e-04         | .927        | 1.90e-06        | 1.38e-03        |
| Human_Motor_Thalamus_L_MB.nii.gz             | 0.91         | 1.46e-04         | -1.69e-04        | 4.61e-04         | .500        | 3.87e-05        | 6.22e-03        |
| Human_Motor_Thalamus_L_MD.nii.gz             | 2.10         | 1.64e-04         | 1.08e-05         | 3.17e-04         | .056        | 2.07e-04        | 1.44e-02        |

Table S17

*ET\_PRS Lead\_DBS Extended Associations with grey matter diffusion magnetic resonance imaging (dMRI) – Axial Diffusivity (AD)*

| Tract                                        | $t$   | $\beta$   | CI_low    | CI_up    | $p$  | Eta2     | Cohens_f |
|----------------------------------------------|-------|-----------|-----------|----------|------|----------|----------|
| Human_Motor_Thalamus_L_MDCL.nii.gz           | 2.02  | 1.22e-04  | 3.80e-06  | 2.40e-04 | .059 | 1.92e-04 | 1.39e-02 |
| Human_Motor_Thalamus_L_MG.nii.gz             | 0.14  | 1.32e-05  | -1.77e-04 | 2.03e-04 | 1.00 | 8.63e-07 | 9.29e-04 |
| Human_Motor_Thalamus_L_MI.nii.gz             | -0.40 | -5.59e-05 | -3.30e-04 | 2.18e-04 | .758 | 7.52e-06 | 2.74e-03 |
| Human_Motor_Thalamus_L_Midbrain.nii.gz       | 0.66  | 4.01e-05  | -7.86e-05 | 1.59e-04 | .590 | 2.06e-05 | 4.54e-03 |
| Human_Motor_Thalamus_L_ot.nii.gz             | -0.13 | -1.05e-05 | -1.65e-04 | 1.44e-04 | 1.00 | 8.30e-07 | 9.11e-04 |
| Human_Motor_Thalamus_L_Po.nii.gz             | 0.35  | 2.85e-05  | -1.29e-04 | 1.86e-04 | .935 | 5.91e-06 | 2.43e-03 |
| Human_Motor_Thalamus_L_PPN.nii.gz            | 0.66  | 6.64e-05  | -1.30e-04 | 2.63e-04 | .559 | 2.06e-05 | 4.53e-03 |
| Human_Motor_Thalamus_L_Pul.nii.gz            | 1.00  | 6.52e-05  | -6.33e-05 | 1.94e-04 | .352 | 4.65e-05 | 6.82e-03 |
| Human_Motor_Thalamus_L_R.nii.gz              | -0.91 | -7.31e-05 | -2.30e-04 | 8.40e-05 | .569 | 3.90e-05 | 6.24e-03 |
| Human_Motor_Thalamus_L_Rt.nii.gz             | -0.47 | -2.74e-05 | -1.42e-04 | 8.73e-05 | .704 | 1.03e-05 | 3.21e-03 |
| Human_Motor_Thalamus_L_SN.nii.gz             | -0.80 | -6.81e-05 | -2.35e-04 | 9.87e-05 | .553 | 3.00e-05 | 5.48e-03 |
| Human_Motor_Thalamus_L_STN.nii.gz            | -1.13 | -1.10e-04 | -3.03e-04 | 8.19e-05 | .409 | 5.94e-05 | 7.71e-03 |
| Human_Motor_Thalamus_L_VAn.nii.gz            | -0.83 | -6.39e-05 | -2.16e-04 | 8.78e-05 | .500 | 3.20e-05 | 5.66e-03 |
| Human_Motor_Thalamus_L_VAp.nii.gz            | -0.09 | -5.32e-06 | -1.27e-04 | 1.17e-04 | 1.00 | 3.44e-07 | 5.86e-04 |
| Human_Motor_Thalamus_L_VLdVLv.nii.gz         | 0.78  | 4.17e-05  | -6.27e-05 | 1.46e-04 | .477 | 2.88e-05 | 5.36e-03 |
| Human_Motor_Thalamus_L_VPi.nii.gz            | -0.19 | -1.40e-05 | -1.60e-04 | 1.32e-04 | .936 | 1.66e-06 | 1.29e-03 |
| Human_Motor_Thalamus_L_VPIVpm.nii.gz         | 0.40  | 2.46e-05  | -9.59e-05 | 1.45e-04 | .758 | 7.52e-06 | 2.74e-03 |
| Human_Motor_Thalamus_R_A.nii.gz              | 1.11  | 1.47e-04  | -1.12e-04 | 4.07e-04 | .293 | 5.79e-05 | 7.61e-03 |
| Human_Motor_Thalamus_R_acbcbasc.nii.gz       | -0.49 | -3.29e-05 | -1.64e-04 | 9.80e-05 | .761 | 1.14e-05 | 3.37e-03 |
| Human_Motor_Thalamus_R_alfrfxmtpc.nii.gz     | 1.34  | 1.50e-04  | -6.94e-05 | 3.69e-04 | .199 | 8.42e-05 | 9.17e-03 |
| Human_Motor_Thalamus_R_BasalForebrain.nii.gz | 0.20  | 1.59e-05  | -1.37e-04 | 1.68e-04 | .922 | 1.95e-06 | 1.40e-03 |
| Human_Motor_Thalamus_R_CdPutVSt.nii.gz       | 0.81  | 5.35e-05  | -7.57e-05 | 1.83e-04 | .459 | 3.09e-05 | 5.56e-03 |
| Human_Motor_Thalamus_R_CMPf.nii.gz           | 0.68  | 4.30e-05  | -8.08e-05 | 1.67e-04 | .606 | 2.18e-05 | 4.66e-03 |

Table S17

*ET\_PRS Lead\_DBS Extended Associations with grey matter diffusion magnetic resonance imaging (dMRI) – Axial Diffusivity (AD)*

| Tract                                         | <i>t</i>    | $\beta$         | CI_low          | CI_up           | <i>p</i>    | Eta2            | Cohens_f        |
|-----------------------------------------------|-------------|-----------------|-----------------|-----------------|-------------|-----------------|-----------------|
| Human_Motor_Thalamus_R_Connectivetissue.nii.g | 0.87        | 1.34e-04        | -1.69e-04       | 4.37e-04        | .530        | 3.53e-05        | 5.94e-03        |
| z                                             |             |                 |                 |                 |             |                 |                 |
| Human_Motor_Thalamus_R_eml.nii.gz             | -0.20       | -1.91e-05       | -2.10e-04       | 1.72e-04        | .929        | 1.80e-06        | 1.34e-03        |
| Human_Motor_Thalamus_R_GPI.nii.gz             | 0.23        | 1.49e-05        | -1.14e-04       | 1.43e-04        | .902        | 2.42e-06        | 1.56e-03        |
| Human_Motor_Thalamus_R_GPm.nii.gz             | -0.69       | -5.00e-05       | -1.92e-04       | 9.17e-05        | .538        | 2.24e-05        | 4.74e-03        |
| Human_Motor_Thalamus_R_Hbl.nii.gz             | 1.70        | 3.05e-04        | -4.74e-05       | 6.57e-04        | .124        | 1.35e-04        | 1.16e-02        |
| Human_Motor_Thalamus_R_Hypothalamus.nii.gz    | 0.43        | 3.74e-05        | -1.34e-04       | 2.09e-04        | .737        | 8.53e-06        | 2.92e-03        |
| Human_Motor_Thalamus_R_ic.nii.gz              | 1.29        | 9.60e-05        | -4.95e-05       | 2.41e-04        | .284        | 7.85e-05        | 8.86e-03        |
| <b>Human_Motor_Thalamus_R_LD.nii.gz</b>       | <b>2.57</b> | <b>4.41e-04</b> | <b>1.05e-04</b> | <b>7.78e-04</b> | <b>.016</b> | <b>3.10e-04</b> | <b>1.76e-02</b> |
| Human_Motor_Thalamus_R_LG.nii.gz              | 1.48        | 1.22e-04        | -3.89e-05       | 2.82e-04        | .207        | 1.03e-04        | 1.02e-02        |
| Human_Motor_Thalamus_R_Li.nii.gz              | 0.86        | 5.67e-05        | -7.26e-05       | 1.86e-04        | .429        | 3.47e-05        | 5.89e-03        |
| Human_Motor_Thalamus_R_M.nii.gz               | -0.77       | -6.53e-05       | -2.32e-04       | 1.02e-04        | .538        | 2.76e-05        | 5.25e-03        |
| Human_Motor_Thalamus_R_MB.nii.gz              | 1.22        | 1.93e-04        | -1.16e-04       | 5.01e-04        | .339        | 7.03e-05        | 8.38e-03        |
| Human_Motor_Thalamus_R_MD.nii.gz              | 1.17        | 9.52e-05        | -6.49e-05       | 2.55e-04        | .268        | 6.37e-05        | 7.98e-03        |
| <b>Human_Motor_Thalamus_R_MDCL.nii.gz</b>     | <b>2.11</b> | <b>1.29e-04</b> | <b>8.97e-06</b> | <b>2.49e-04</b> | <b>.048</b> | <b>2.08e-04</b> | <b>1.44e-02</b> |
| Human_Motor_Thalamus_R_MG.nii.gz              | -0.06       | -6.13e-06       | -1.95e-04       | 1.83e-04        | 1.00        | 1.90e-07        | 4.35e-04        |
| Human_Motor_Thalamus_R_MGC.nii.gz             | 0.11        | 8.74e-06        | -1.45e-04       | 1.63e-04        | 1.00        | 5.80e-07        | 7.62e-04        |
| Human_Motor_Thalamus_R_MI.nii.gz              | -0.81       | -1.37e-04       | -4.69e-04       | 1.96e-04        | .462        | 3.05e-05        | 5.52e-03        |
| Human_Motor_Thalamus_R_Midbrain.nii.gz        | 0.44        | 2.65e-05        | -9.27e-05       | 1.46e-04        | .729        | 8.90e-06        | 2.98e-03        |
| Human_Motor_Thalamus_R_ot.nii.gz              | 1.11        | 1.32e-04        | -1.01e-04       | 3.65e-04        | .492        | 5.75e-05        | 7.58e-03        |
| Human_Motor_Thalamus_R_PC.nii.gz              | 1.43        | 1.27e-04        | -4.74e-05       | 3.02e-04        | .188        | 9.56e-05        | 9.78e-03        |
| Human_Motor_Thalamus_R_Po.nii.gz              | 1.17        | 9.23e-05        | -6.16e-05       | 2.46e-04        | .443        | 6.48e-05        | 8.05e-03        |
| Human_Motor_Thalamus_R_PPN.nii.gz             | -0.35       | -2.77e-05       | -1.85e-04       | 1.30e-04        | .899        | 5.59e-06        | 2.36e-03        |

Table S17

*ET\_PRS Lead\_DBS Extended Associations with grey matter diffusion magnetic resonance imaging (dMRI) – Axial**Diffusivity (AD)*

| Tract                                | <i>t</i> | $\beta$   | CI_low    | CI_up    | <i>p</i> | Eta2     | Cohens_f |
|--------------------------------------|----------|-----------|-----------|----------|----------|----------|----------|
| Human_Motor_Thalamus_R_Pul.nii.gz    | 0.87     | 5.83e-05  | -7.23e-05 | 1.89e-04 | .467     | 3.59e-05 | 5.99e-03 |
| Human_Motor_Thalamus_R_R.nii.gz      | -0.20    | -1.67e-05 | -1.79e-04 | 1.46e-04 | .924     | 1.92e-06 | 1.38e-03 |
| Human_Motor_Thalamus_R_Rt.nii.gz     | -0.02    | -8.63e-07 | -1.09e-04 | 1.07e-04 | 1.00     | 1.15e-08 | 1.07e-04 |
| Human_Motor_Thalamus_R_SN.nii.gz     | -1.52    | -1.24e-04 | -2.84e-04 | 3.58e-05 | .201     | 1.09e-04 | 1.04e-02 |
| Human_Motor_Thalamus_R_STN.nii.gz    | -1.26    | -1.25e-04 | -3.20e-04 | 6.99e-05 | .327     | 7.43e-05 | 8.62e-03 |
| Human_Motor_Thalamus_R_VAn.nii.gz    | -0.27    | -2.06e-05 | -1.69e-04 | 1.28e-04 | .864     | 3.49e-06 | 1.87e-03 |
| Human_Motor_Thalamus_R_VAp.nii.gz    | 0.19     | 1.23e-05  | -1.12e-04 | 1.37e-04 | .931     | 1.77e-06 | 1.33e-03 |
| Human_Motor_Thalamus_R_VLdVLv.nii.gz | 0.89     | 4.87e-05  | -5.85e-05 | 1.56e-04 | .411     | 3.72e-05 | 6.10e-03 |
| Human_Motor_Thalamus_R_VPi.nii.gz    | -0.43    | -3.17e-05 | -1.77e-04 | 1.13e-04 | .816     | 8.64e-06 | 2.94e-03 |
| Human_Motor_Thalamus_R_VPIVPm.nii.gz | -0.16    | -9.60e-06 | -1.30e-04 | 1.11e-04 | .963     | 1.15e-06 | 1.07e-03 |
| HybraPD_Atlas_L_Ca.nii.gz            | 0.57     | 4.97e-05  | -1.20e-04 | 2.19e-04 | .622     | 1.55e-05 | 3.94e-03 |
| HybraPD_Atlas_L_DN.nii.gz            | -0.24    | -1.71e-05 | -1.56e-04 | 1.21e-04 | .889     | 2.75e-06 | 1.66e-03 |
| HybraPD_Atlas_L_GPe.nii.gz           | 0.11     | 8.54e-06  | -1.46e-04 | 1.63e-04 | 1.00     | 5.53e-07 | 7.43e-04 |
| HybraPD_Atlas_L_GPi.nii.gz           | -0.32    | -2.51e-05 | -1.79e-04 | 1.29e-04 | .916     | 4.79e-06 | 2.19e-03 |
| HybraPD_Atlas_L_NAC.nii.gz           | -0.85    | -7.20e-05 | -2.39e-04 | 9.47e-05 | .546     | 3.36e-05 | 5.80e-03 |
| HybraPD_Atlas_L_Pu.nii.gz            | 0.65     | 3.60e-05  | -7.29e-05 | 1.45e-04 | .711     | 1.97e-05 | 4.43e-03 |
| HybraPD_Atlas_L_RN.nii.gz            | -0.68    | -5.84e-05 | -2.26e-04 | 1.09e-04 | .623     | 2.20e-05 | 4.69e-03 |
| HybraPD_Atlas_L_TH.MN.nii.gz         | 1.34     | 8.12e-05  | -3.78e-05 | 2.00e-04 | .249     | 8.39e-05 | 9.16e-03 |
| HybraPD_Atlas_L_TH.P.nii.gz          | -0.26    | -1.77e-05 | -1.52e-04 | 1.17e-04 | .876     | 3.13e-06 | 1.77e-03 |
| HybraPD_Atlas_L_TH.VN.nii.gz         | 0.62     | 3.24e-05  | -7.02e-05 | 1.35e-04 | .590     | 1.79e-05 | 4.24e-03 |
| HybraPD_Atlas_R_Ca.nii.gz            | 0.32     | 3.20e-05  | -1.66e-04 | 2.30e-04 | .826     | 4.72e-06 | 2.17e-03 |
| HybraPD_Atlas_R_DN.nii.gz            | 0.01     | 7.94e-07  | -1.44e-04 | 1.45e-04 | 1.00     | 5.46e-09 | 7.39e-05 |
| HybraPD_Atlas_R_GPe.nii.gz           | 0.82     | 6.20e-05  | -8.52e-05 | 2.09e-04 | .500     | 3.19e-05 | 5.65e-03 |

Table S17

*ET\_PRS Lead\_DBs Extended Associations with grey matter diffusion magnetic resonance imaging (dMRI) – Axial Diffusivity (AD)*

| Tract                                              | <i>t</i> | $\beta$   | CI_low    | CI_up    | <i>p</i> | Eta2     | Cohens_f |
|----------------------------------------------------|----------|-----------|-----------|----------|----------|----------|----------|
| HybraPD_Atlas_R_GPi.nii.gz                         | -0.56    | -4.29e-05 | -1.93e-04 | 1.08e-04 | .634     | 1.46e-05 | 3.83e-03 |
| HybraPD_Atlas_R_NAC.nii.gz                         | -0.53    | -4.46e-05 | -2.08e-04 | 1.19e-04 | .932     | 1.34e-05 | 3.66e-03 |
| HybraPD_Atlas_R_Pu.nii.gz                          | 0.34     | 1.89e-05  | -8.99e-05 | 1.28e-04 | .807     | 5.44e-06 | 2.33e-03 |
| HybraPD_Atlas_R_RN.nii.gz                          | 0.22     | 1.96e-05  | -1.56e-04 | 1.95e-04 | .909     | 2.25e-06 | 1.50e-03 |
| HybraPD_Atlas_R_TH.MN.nii.gz                       | 0.84     | 5.38e-05  | -7.16e-05 | 1.79e-04 | .489     | 3.32e-05 | 5.76e-03 |
| HybraPD_Atlas_R_TH.P.nii.gz                        | -0.41    | -3.03e-05 | -1.76e-04 | 1.16e-04 | .836     | 7.78e-06 | 2.79e-03 |
| HybraPD_Atlas_R_TH.VN.nii.gz                       | 0.42     | 2.29e-05  | -8.32e-05 | 1.29e-04 | .740     | 8.39e-06 | 2.90e-03 |
| Melbourne_Subcortex_Atlas_LH_aCAU.nii.gz           | 1.21     | 1.29e-04  | -7.93e-05 | 3.37e-04 | .275     | 6.91e-05 | 8.31e-03 |
| Melbourne_Subcortex_Atlas_LH_aGP.nii.gz            | -0.48    | -3.78e-05 | -1.91e-04 | 1.15e-04 | .692     | 1.10e-05 | 3.31e-03 |
| Melbourne_Subcortex_Atlas_LH_aHIP.nii.gz           | 0.01     | 7.71e-07  | -1.26e-04 | 1.28e-04 | 1.00     | 6.64e-09 | 8.15e-05 |
| Melbourne_Subcortex_Atlas_LH_AMY.nii.gz            | -0.25    | -1.54e-05 | -1.36e-04 | 1.05e-04 | .883     | 2.92e-06 | 1.71e-03 |
| Melbourne_Subcortex_Atlas_LH_aPUT.nii.gz           | 0.40     | 2.18e-05  | -8.56e-05 | 1.29e-04 | .760     | 7.43e-06 | 2.73e-03 |
| Melbourne_Subcortex_Atlas_LH_aTHA.nii.gz           | 1.95     | 1.54e-04  | -1.16e-06 | 3.08e-04 | .071     | 1.77e-04 | 1.33e-02 |
| Melbourne_Subcortex_Atlas_LH_CAU-body.nii.gz       | 1.30     | 1.49e-04  | -7.61e-05 | 3.74e-04 | .238     | 7.89e-05 | 8.88e-03 |
| Melbourne_Subcortex_Atlas_LH_CAU-DA.nii.gz         | 1.34     | 1.63e-04  | -7.63e-05 | 4.02e-04 | .200     | 8.37e-05 | 9.15e-03 |
| Melbourne_Subcortex_Atlas_LH_CAU-tail.nii.gz       | 1.55     | 1.80e-04  | -4.79e-05 | 4.09e-04 | .134     | 1.12e-04 | 1.06e-02 |
| Melbourne_Subcortex_Atlas_LH_CAU-VA.nii.gz         | 0.94     | 9.59e-05  | -1.03e-04 | 2.95e-04 | .379     | 4.19e-05 | 6.47e-03 |
| Melbourne_Subcortex_Atlas_LH_CAU.nii.gz            | 1.31     | 1.39e-04  | -6.94e-05 | 3.48e-04 | .233     | 8.03e-05 | 8.96e-03 |
| Melbourne_Subcortex_Atlas_LH_GP.nii.gz             | -0.40    | -2.62e-05 | -1.54e-04 | 1.01e-04 | .765     | 7.61e-06 | 2.76e-03 |
| Melbourne_Subcortex_Atlas_LH_HIP-body.nii.gz       | 1.32     | 1.04e-04  | -5.00e-05 | 2.58e-04 | .227     | 8.22e-05 | 9.07e-03 |
| Melbourne_Subcortex_Atlas_LH_HIP-head-l.nii.gz     | 0.31     | 2.00e-05  | -1.08e-04 | 1.48e-04 | .836     | 4.37e-06 | 2.09e-03 |
| Melbourne_Subcortex_Atlas_LH_HIP-head-<br>m.nii.gz | -0.41    | -3.35e-05 | -1.92e-04 | 1.25e-04 | .748     | 8.00e-06 | 2.83e-03 |



Table S17

*ET\_PRS Lead\_DBS Extended Associations with grey matter diffusion magnetic resonance imaging (dMRI) – Axial**Diffusivity (AD)*

| Tract                                               | <i>t</i>    | $\beta$         | CI_low          | CI_up           | <i>p</i>    | Eta2            | Cohens_f        |
|-----------------------------------------------------|-------------|-----------------|-----------------|-----------------|-------------|-----------------|-----------------|
| Melbourne_Subcortex_Atlas_LH_HIP-head-m1.nii.gz     | -0.40       | -3.03e-05       | -1.78e-04       | 1.17e-04        | .756        | 7.62e-06        | 2.76e-03        |
| Melbourne_Subcortex_Atlas_LH_HIP-head-m2.nii.gz     | -0.27       | -2.66e-05       | -2.20e-04       | 1.67e-04        | .867        | 3.39e-06        | 1.84e-03        |
| <b>Melbourne_Subcortex_Atlas_LH_HIP-tail.nii.gz</b> | <b>2.38</b> | <b>2.14e-04</b> | <b>3.77e-05</b> | <b>3.90e-04</b> | <b>.024</b> | <b>2.66e-04</b> | <b>1.63e-02</b> |
| Melbourne_Subcortex_Atlas_LH_HIP.nii.gz             | 0.93        | 6.10e-05        | -6.70e-05       | 1.89e-04        | .428        | 4.10e-05        | 6.40e-03        |
| Melbourne_Subcortex_Atlas_LH_IAMY.nii.gz            | -0.66       | -3.55e-05       | -1.41e-04       | 6.95e-05        | .621        | 2.06e-05        | 4.54e-03        |
| Melbourne_Subcortex_Atlas_LH_mAMY.nii.gz            | 0.12        | 9.20e-06        | -1.41e-04       | 1.59e-04        | .995        | 6.76e-07        | 8.22e-04        |
| Melbourne_Subcortex_Atlas_LH_NAc-core.nii.gz        | 0.64        | 5.73e-05        | -1.18e-04       | 2.33e-04        | .575        | 1.92e-05        | 4.38e-03        |
| Melbourne_Subcortex_Atlas_LH_NAc-shell.nii.gz       | -0.16       | -1.11e-05       | -1.48e-04       | 1.26e-04        | .961        | 1.19e-06        | 1.09e-03        |
| Melbourne_Subcortex_Atlas_LH_NAc.nii.gz             | 0.27        | 1.88e-05        | -1.20e-04       | 1.58e-04        | .870        | 3.31e-06        | 1.82e-03        |
| Melbourne_Subcortex_Atlas_LH_pCAU.nii.gz            | 1.39        | 1.58e-04        | -6.55e-05       | 3.82e-04        | .203        | 9.01e-05        | 9.49e-03        |
| Melbourne_Subcortex_Atlas_LH_pGP.nii.gz             | -0.21       | -1.21e-05       | -1.26e-04       | 1.01e-04        | .956        | 2.05e-06        | 1.43e-03        |
| Melbourne_Subcortex_Atlas_LH_pHIP.nii.gz            | 1.79        | 1.41e-04        | -1.36e-05       | 2.95e-04        | .090        | 1.50e-04        | 1.22e-02        |
| Melbourne_Subcortex_Atlas_LH_pPUT.nii.gz            | 0.17        | 8.81e-06        | -9.49e-05       | 1.13e-04        | .955        | 1.30e-06        | 1.14e-03        |
| Melbourne_Subcortex_Atlas_LH_pTHA.nii.gz            | 1.03        | 6.60e-05        | -5.95e-05       | 1.91e-04        | .416        | 4.99e-05        | 7.06e-03        |
| Melbourne_Subcortex_Atlas_LH_PUT-DA.nii.gz          | 0.46        | 2.59e-05        | -8.34e-05       | 1.35e-04        | .785        | 1.01e-05        | 3.18e-03        |
| Melbourne_Subcortex_Atlas_LH_PUT-DP.nii.gz          | 0.76        | 4.10e-05        | -6.46e-05       | 1.47e-04        | .491        | 2.72e-05        | 5.21e-03        |
| Melbourne_Subcortex_Atlas_LH_PUT-VA.nii.gz          | 0.28        | 1.60e-05        | -9.55e-05       | 1.27e-04        | .857        | 3.69e-06        | 1.92e-03        |
| Melbourne_Subcortex_Atlas_LH_PUT-VP.nii.gz          | -0.43       | -2.37e-05       | -1.33e-04       | 8.53e-05        | .819        | 8.54e-06        | 2.92e-03        |
| Melbourne_Subcortex_Atlas_LH_PUT.nii.gz             | 0.29        | 1.48e-05        | -8.61e-05       | 1.16e-04        | .852        | 3.86e-06        | 1.97e-03        |
| <b>Melbourne_Subcortex_Atlas_LH_THA-DA.nii.gz</b>   | <b>2.80</b> | <b>2.47e-04</b> | <b>7.44e-05</b> | <b>4.20e-04</b> | <b>.007</b> | <b>3.68e-04</b> | <b>1.92e-02</b> |
| Melbourne_Subcortex_Atlas_LH_THA-DAL.nii.gz         | 2.03        | 1.18e-04        | 4.20e-06        | 2.33e-04        | .052        | 1.94e-04        | 1.39e-02        |

Table S17

*ET\_PRS Lead\_DBS Extended Associations with grey matter diffusion magnetic resonance imaging (dMRI) – Axial Diffusivity (AD)*

| Tract                                              | <i>t</i>    | $\beta$         | CI_low          | CI_up           | <i>p</i>    | Eta2            | Cohens_f        |
|----------------------------------------------------|-------------|-----------------|-----------------|-----------------|-------------|-----------------|-----------------|
| <b>Melbourne_Subcortex_Atlas_LH_THA-DAm.nii.gz</b> | <b>2.85</b> | <b>3.53e-04</b> | <b>1.10e-04</b> | <b>5.96e-04</b> | <b>.006</b> | <b>3.80e-04</b> | <b>1.95e-02</b> |
| Melbourne_Subcortex_Atlas_LH_THA-DP.nii.gz         | 0.75        | 5.73e-05        | -9.18e-05       | 2.06e-04        | .496        | 2.67e-05        | 5.16e-03        |
| Melbourne_Subcortex_Atlas_LH_THA-VA.nii.gz         | 1.22        | 1.00e-04        | -6.09e-05       | 2.61e-04        | .272        | 6.98e-05        | 8.35e-03        |
| Melbourne_Subcortex_Atlas_LH_THA-VAi.nii.gz        | 0.65        | 5.75e-05        | -1.15e-04       | 2.30e-04        | .627        | 2.01e-05        | 4.48e-03        |
| Melbourne_Subcortex_Atlas_LH_THA-VAia.nii.gz       | 0.07        | 6.84e-06        | -1.96e-04       | 2.10e-04        | 1.00        | 2.05e-07        | 4.53e-04        |
| Melbourne_Subcortex_Atlas_LH_THA-VAip.nii.gz       | 1.14        | 9.00e-05        | -6.48e-05       | 2.45e-04        | .311        | 6.09e-05        | 7.80e-03        |
| Melbourne_Subcortex_Atlas_LH_THA-VAs.nii.gz        | 2.01        | 1.69e-04        | 3.84e-06        | 3.33e-04        | .055        | 1.89e-04        | 1.37e-02        |
| Melbourne_Subcortex_Atlas_LH_THA-VP.nii.gz         | 1.33        | 7.69e-05        | -3.61e-05       | 1.90e-04        | .251        | 8.34e-05        | 9.13e-03        |
| Melbourne_Subcortex_Atlas_LH_THA-VPl.nii.gz        | 0.76        | 4.40e-05        | -6.93e-05       | 1.57e-04        | .614        | 2.72e-05        | 5.21e-03        |
| Melbourne_Subcortex_Atlas_LH_THA-VPm.nii.gz        | 1.64        | 1.05e-04        | -2.05e-05       | 2.30e-04        | .139        | 1.26e-04        | 1.12e-02        |
| Melbourne_Subcortex_Atlas_RH_aCAU.nii.gz           | 0.34        | 2.84e-05        | -1.36e-04       | 1.93e-04        | .809        | 5.36e-06        | 2.32e-03        |
| Melbourne_Subcortex_Atlas_RH_aGP.nii.gz            | -0.18       | -1.35e-05       | -1.63e-04       | 1.36e-04        | .969        | 1.45e-06        | 1.21e-03        |
| Melbourne_Subcortex_Atlas_RH_aHIP.nii.gz           | 0.05        | 3.12e-06        | -1.20e-04       | 1.26e-04        | 1.00        | 1.16e-07        | 3.41e-04        |
| Melbourne_Subcortex_Atlas_RH_AMY.nii.gz            | -0.20       | -1.15e-05       | -1.26e-04       | 1.03e-04        | .929        | 1.80e-06        | 1.34e-03        |
| Melbourne_Subcortex_Atlas_RH_aPUT.nii.gz           | 0.32        | 1.72e-05        | -8.91e-05       | 1.23e-04        | .826        | 4.72e-06        | 2.17e-03        |
| Melbourne_Subcortex_Atlas_RH_aTHA.nii.gz           | 1.58        | 1.11e-04        | -2.71e-05       | 2.50e-04        | .127        | 1.16e-04        | 1.08e-02        |
| Melbourne_Subcortex_Atlas_RH_CAU-body.nii.gz       | 0.54        | 4.43e-05        | -1.18e-04       | 2.06e-04        | .651        | 1.35e-05        | 3.67e-03        |
| Melbourne_Subcortex_Atlas_RH_CAU-DA.nii.gz         | 0.28        | 2.83e-05        | -1.71e-04       | 2.27e-04        | .859        | 3.64e-06        | 1.91e-03        |
| Melbourne_Subcortex_Atlas_RH_CAU-tail.nii.gz       | 0.39        | 2.96e-05        | -1.19e-04       | 1.78e-04        | .766        | 7.13e-06        | 2.67e-03        |
| Melbourne_Subcortex_Atlas_RH_CAU-VA.nii.gz         | 0.40        | 2.90e-05        | -1.12e-04       | 1.70e-04        | .756        | 7.58e-06        | 2.75e-03        |
| Melbourne_Subcortex_Atlas_RH_CAU.nii.gz            | 0.40        | 3.25e-05        | -1.25e-04       | 1.90e-04        | .754        | 7.68e-06        | 2.77e-03        |
| Melbourne_Subcortex_Atlas_RH_GP.nii.gz             | -0.11       | -7.27e-06       | -1.31e-04       | 1.17e-04        | 1.00        | 6.19e-07        | 7.87e-04        |

**Table S17**

***ET\_PRS Lead\_DBs Extended Associations with grey matter diffusion magnetic resonance imaging (dMRI) – Axial Diffusivity (AD)***

| Tract                                           | <i>t</i> | $\beta$   | CI_low    | CI_up    | <i>p</i> | Eta2     | Cohens_f |
|-------------------------------------------------|----------|-----------|-----------|----------|----------|----------|----------|
| Melbourne_Subcortex_Atlas_RH_HIP-body.nii.gz    | 1.28     | 1.00e-04  | -5.31e-05 | 2.53e-04 | .245     | 7.68e-05 | 8.76e-03 |
| Melbourne_Subcortex_Atlas_RH_HIP-head-l.nii.gz  | 0.01     | 9.05e-07  | -1.28e-04 | 1.30e-04 | 1.00     | 8.84e-09 | 9.40e-05 |
| Melbourne_Subcortex_Atlas_RH_HIP-head-m.nii.gz  | -0.11    | -8.26e-06 | -1.53e-04 | 1.36e-04 | 1.00     | 5.87e-07 | 7.66e-04 |
| Melbourne_Subcortex_Atlas_RH_HIP-head-m1.nii.gz | -0.74    | -5.15e-05 | -1.88e-04 | 8.45e-05 | .504     | 2.59e-05 | 5.09e-03 |
| Melbourne_Subcortex_Atlas_RH_HIP-head-m2.nii.gz | 0.73     | 6.97e-05  | -1.16e-04 | 2.56e-04 | .509     | 2.53e-05 | 5.03e-03 |
| Melbourne_Subcortex_Atlas_RH_HIP-tail.nii.gz    | 1.29     | 1.11e-04  | -5.76e-05 | 2.80e-04 | .240     | 7.82e-05 | 8.85e-03 |
| Melbourne_Subcortex_Atlas_RH_HIP.nii.gz         | 0.77     | 4.83e-05  | -7.50e-05 | 1.72e-04 | .541     | 2.77e-05 | 5.26e-03 |
| Melbourne_Subcortex_Atlas_RH_IAMY.nii.gz        | -0.84    | -4.56e-05 | -1.53e-04 | 6.13e-05 | .493     | 3.28e-05 | 5.73e-03 |
| Melbourne_Subcortex_Atlas_RH_mAMY.nii.gz        | 0.36     | 2.45e-05  | -1.09e-04 | 1.58e-04 | .791     | 6.06e-06 | 2.46e-03 |
| Melbourne_Subcortex_Atlas_RH_NAc-core.nii.gz    | -0.35    | -2.49e-05 | -1.66e-04 | 1.16e-04 | .803     | 5.60e-06 | 2.37e-03 |
| Melbourne_Subcortex_Atlas_RH_NAc-shell.nii.gz   | -0.52    | -3.55e-05 | -1.69e-04 | 9.81e-05 | .663     | 1.27e-05 | 3.57e-03 |
| Melbourne_Subcortex_Atlas_RH_NAc.nii.gz         | -0.48    | -3.07e-05 | -1.55e-04 | 9.36e-05 | .691     | 1.10e-05 | 3.32e-03 |
| Melbourne_Subcortex_Atlas_RH_pCAU.nii.gz        | 0.51     | 4.02e-05  | -1.16e-04 | 1.96e-04 | .674     | 1.20e-05 | 3.46e-03 |
| Melbourne_Subcortex_Atlas_RH_pGP.nii.gz         | -0.02    | -8.48e-07 | -1.10e-04 | 1.09e-04 | 1.00     | 1.08e-08 | 1.04e-04 |
| Melbourne_Subcortex_Atlas_RH_pHIP.nii.gz        | 1.35     | 1.03e-04  | -4.64e-05 | 2.52e-04 | .211     | 8.55e-05 | 9.25e-03 |
| Melbourne_Subcortex_Atlas_RH_pPUT.nii.gz        | 0.82     | 4.29e-05  | -5.96e-05 | 1.45e-04 | .453     | 3.15e-05 | 5.62e-03 |
| Melbourne_Subcortex_Atlas_RH_pTHA.nii.gz        | 1.23     | 8.11e-05  | -4.86e-05 | 2.11e-04 | .269     | 7.05e-05 | 8.39e-03 |
| Melbourne_Subcortex_Atlas_RH_PUT-DA.nii.gz      | 0.67     | 3.65e-05  | -6.99e-05 | 1.43e-04 | .551     | 2.12e-05 | 4.61e-03 |
| Melbourne_Subcortex_Atlas_RH_PUT-DP.nii.gz      | 1.17     | 6.25e-05  | -4.25e-05 | 1.68e-04 | .268     | 6.39e-05 | 7.99e-03 |
| Melbourne_Subcortex_Atlas_RH_PUT-VA.nii.gz      | -0.03    | -1.76e-06 | -1.14e-04 | 1.11e-04 | 1.00     | 4.41e-08 | 2.10e-04 |

Table S17

*ET\_PRS Lead\_DBS Extended Associations with grey matter diffusion magnetic resonance imaging (dMRI) – Axial Diffusivity (AD)*

| Tract                                                       | <i>t</i>    | $\beta$         | CI_low          | CI_up           | <i>p</i>    | Eta2            | Cohens_f        |
|-------------------------------------------------------------|-------------|-----------------|-----------------|-----------------|-------------|-----------------|-----------------|
| Melbourne_Subcortex_Atlas_RH_PUT-VP.nii.gz                  | 0.42        | 2.25e-05        | -8.37e-05       | 1.29e-04        | .829        | 8.09e-06        | 2.84e-03        |
| Melbourne_Subcortex_Atlas_RH_PUT.nii.gz                     | 0.61        | 3.10e-05        | -6.92e-05       | 1.31e-04        | .598        | 1.73e-05        | 4.16e-03        |
| <b>Melbourne_Subcortex_Atlas_RH_THA-<br/>DA.nii.gz</b>      | <b>2.56</b> | <b>2.15e-04</b> | <b>5.06e-05</b> | <b>3.79e-04</b> | <b>.014</b> | <b>3.08e-04</b> | <b>1.76e-02</b> |
| Melbourne_Subcortex_Atlas_RH_THA-DAL.nii.gz                 | 1.70        | 9.89e-05        | -1.48e-05       | 2.13e-04        | .121        | 1.36e-04        | 1.17e-02        |
| <b>Melbourne_Subcortex_Atlas_RH_THA-<br/>DAm.nii.gz</b>     | <b>2.65</b> | <b>2.98e-04</b> | <b>7.79e-05</b> | <b>5.17e-04</b> | <b>.011</b> | <b>3.31e-04</b> | <b>1.82e-02</b> |
| Melbourne_Subcortex_Atlas_RH_THA-DP.nii.gz                  | 1.62        | 1.31e-04        | -2.72e-05       | 2.88e-04        | .165        | 1.23e-04        | 1.11e-02        |
| Melbourne_Subcortex_Atlas_RH_THA-VA.nii.gz                  | 0.75        | 5.29e-05        | -8.49e-05       | 1.91e-04        | .497        | 2.66e-05        | 5.15e-03        |
| Melbourne_Subcortex_Atlas_RH_THA-VAi.nii.gz                 | 0.26        | 1.92e-05        | -1.27e-04       | 1.65e-04        | .877        | 3.09e-06        | 1.76e-03        |
| Melbourne_Subcortex_Atlas_RH_THA-VAia.nii.gz                | -0.47       | -3.99e-05       | -2.05e-04       | 1.25e-04        | .699        | 1.05e-05        | 3.24e-03        |
| Melbourne_Subcortex_Atlas_RH_THA-VAip.nii.gz                | 0.82        | 5.88e-05        | -8.24e-05       | 2.00e-04        | .456        | 3.13e-05        | 5.59e-03        |
| Melbourne_Subcortex_Atlas_RH_THA-VAs.nii.gz                 | 1.47        | 1.08e-04        | -3.64e-05       | 2.52e-04        | .157        | 1.01e-04        | 1.00e-02        |
| Melbourne_Subcortex_Atlas_RH_THA-VP.nii.gz                  | 0.62        | 3.57e-05        | -7.80e-05       | 1.49e-04        | .658        | 1.78e-05        | 4.21e-03        |
| Melbourne_Subcortex_Atlas_RH_THA-VPI.nii.gz                 | 0.04        | 2.17e-06        | -1.14e-04       | 1.19e-04        | 1.00        | 6.25e-08        | 2.50e-04        |
| Melbourne_Subcortex_Atlas_RH_THA-VPm.nii.gz                 | 1.10        | 6.92e-05        | -5.38e-05       | 1.92e-04        | .330        | 5.70e-05        | 7.55e-03        |
| MNI_PD25_subcortical_LH_amygdala.nii.gz                     | -0.92       | -4.89e-05       | -1.53e-04       | 5.53e-05        | .437        | 3.97e-05        | 6.30e-03        |
| MNI_PD25_subcortical_LH_caudate.nii.gz                      | 1.03        | 9.03e-05        | -8.20e-05       | 2.63e-04        | .335        | 4.95e-05        | 7.03e-03        |
| MNI_PD25_subcortical_LH_globus_pallidus_exter<br>nus.nii.gz | -0.22       | -1.38e-05       | -1.34e-04       | 1.07e-04        | .905        | 2.36e-06        | 1.54e-03        |
| MNI_PD25_subcortical_LH_globus_pallidus_intern<br>us.nii.gz | -0.43       | -2.97e-05       | -1.64e-04       | 1.05e-04        | .732        | 8.77e-06        | 2.96e-03        |
| MNI_PD25_subcortical_LH_hippocampus.nii.gz                  | 1.20        | 7.63e-05        | -4.82e-05       | 2.01e-04        | .281        | 6.77e-05        | 8.23e-03        |

**Table S17**

***ET\_PRS Lead\_DBS Extended Associations with grey matter diffusion magnetic resonance imaging (dMRI) – Axial Diffusivity (AD)***

| Tract                                                   | <i>t</i> | $\beta$   | CI_low    | CI_up    | <i>p</i> | Eta2     | Cohens_f |
|---------------------------------------------------------|----------|-----------|-----------|----------|----------|----------|----------|
| MNI_PD25_subcortical_LH_nucleus_accumbens.nii.gz        | -0.44    | -3.36e-05 | -1.83e-04 | 1.16e-04 | .726     | 9.06e-06 | 3.01e-03 |
| MNI_PD25_subcortical_LH_putamen.nii.gz                  | 0.49     | 2.48e-05  | -7.54e-05 | 1.25e-04 | .690     | 1.10e-05 | 3.32e-03 |
| MNI_PD25_subcortical_LH_red_nucleus.nii.gz              | -1.01    | -7.89e-05 | -2.32e-04 | 7.45e-05 | .431     | 4.77e-05 | 6.90e-03 |
| MNI_PD25_subcortical_LH_substantia_nigra.nii.gz         | -0.62    | -5.56e-05 | -2.32e-04 | 1.21e-04 | .658     | 1.78e-05 | 4.22e-03 |
| MNI_PD25_subcortical_LH_subthalamic_nucleus.nii.gz      | -1.05    | -9.67e-05 | -2.78e-04 | 8.44e-05 | .541     | 5.14e-05 | 7.17e-03 |
| MNI_PD25_subcortical_LH_thalamus.nii.gz                 | 1.46     | 8.71e-05  | -2.95e-05 | 2.04e-04 | .197     | 1.01e-04 | 1.00e-02 |
| MNI_PD25_subcortical_RH_amygdala.nii.gz                 | -0.72    | -3.91e-05 | -1.46e-04 | 6.73e-05 | .576     | 2.44e-05 | 4.94e-03 |
| MNI_PD25_subcortical_RH_caudate.nii.gz                  | 0.65     | 6.69e-05  | -1.34e-04 | 2.68e-04 | .566     | 1.99e-05 | 4.46e-03 |
| MNI_PD25_subcortical_RH_globus_pallidus_exterus.nii.gz  | 0.29     | 1.78e-05  | -1.03e-04 | 1.38e-04 | .850     | 3.90e-06 | 1.98e-03 |
| MNI_PD25_subcortical_RH_globus_pallidus_Internus.nii.gz | -0.71    | -4.79e-05 | -1.81e-04 | 8.50e-05 | .528     | 2.34e-05 | 4.84e-03 |
| MNI_PD25_subcortical_RH_hippocampus.nii.gz              | 0.79     | 4.87e-05  | -7.20e-05 | 1.69e-04 | .524     | 2.94e-05 | 5.42e-03 |
| MNI_PD25_subcortical_RH_nucleus_accumbens.nii.gz        | -0.77    | -5.74e-05 | -2.04e-04 | 8.96e-05 | .539     | 2.75e-05 | 5.24e-03 |
| MNI_PD25_subcortical_RH_putamen.nii.gz                  | 0.62     | 3.19e-05  | -6.83e-05 | 1.32e-04 | .585     | 1.83e-05 | 4.28e-03 |
| MNI_PD25_subcortical_RH_red_nucleus.nii.gz              | -0.29    | -2.29e-05 | -1.80e-04 | 1.34e-04 | .853     | 3.83e-06 | 1.96e-03 |
| MNI_PD25_subcortical_RH_substantia_nigra.nii.gz         | -1.31    | -1.14e-04 | -2.83e-04 | 5.59e-05 | .320     | 8.10e-05 | 9.00e-03 |
| MNI_PD25_subcortical_RH_subthalamic_nucleus.nii.gz      | -1.24    | -1.19e-04 | -3.06e-04 | 6.84e-05 | .369     | 7.26e-05 | 8.52e-03 |
| MNI_PD25_subcortical_RH_thalamus.nii.gz                 | 1.04     | 6.30e-05  | -5.63e-05 | 1.82e-04 | .330     | 5.03e-05 | 7.09e-03 |

Table S17

*ET\_PRS Lead\_DBS Extended Associations with grey matter diffusion magnetic resonance imaging (dMRI) – Axial**Diffusivity (AD)*

| Tract                                             | <i>t</i>    | $\beta$         | CI_low          | CI_up           | <i>p</i>    | Eta2            | Cohens_f        |
|---------------------------------------------------|-------------|-----------------|-----------------|-----------------|-------------|-----------------|-----------------|
| Thalamic_DBS_Connectivity_atlas_LH_Dentate.nii.gz | 0.27        | 1.60e-05        | -9.88e-05       | 1.31e-04        | .926        | 3.50e-06        | 1.87e-03        |
| Thalamic_DBS_Connectivity_atlas_RH_Dentate.nii.gz | 0.37        | 2.14e-05        | -9.18e-05       | 1.35e-04        | .978        | 6.43e-06        | 2.54e-03        |
| Thomas_Atlas_LH_AV.nii.gz                         | 1.43        | 1.70e-04        | -6.30e-05       | 4.02e-04        | .187        | 9.59e-05        | 9.79e-03        |
| Thomas_Atlas_LH_CM.nii.gz                         | 0.84        | 5.01e-05        | -6.61e-05       | 1.66e-04        | .438        | 3.35e-05        | 5.78e-03        |
| <b>Thomas_Atlas_LH_Hb.nii.gz</b>                  | <b>2.52</b> | <b>3.35e-04</b> | <b>7.43e-05</b> | <b>5.96e-04</b> | <b>.016</b> | <b>2.97e-04</b> | <b>1.72e-02</b> |
| Thomas_Atlas_LH_LGN.nii.gz                        | 0.61        | 3.89e-05        | -8.52e-05       | 1.63e-04        | .775        | 1.77e-05        | 4.21e-03        |
| <b>Thomas_Atlas_LH_MD-Pf.nii.gz</b>               | <b>2.31</b> | <b>1.65e-04</b> | <b>2.50e-05</b> | <b>3.06e-04</b> | <b>.033</b> | <b>2.50e-04</b> | <b>1.58e-02</b> |
| Thomas_Atlas_LH_MGN.nii.gz                        | -0.10       | -8.12e-06       | -1.72e-04       | 1.55e-04        | 1.00        | 4.44e-07        | 6.66e-04        |
| Thomas_Atlas_LH_MTT.nii.gz                        | -0.36       | -3.03e-05       | -1.94e-04       | 1.33e-04        | .788        | 6.19e-06        | 2.49e-03        |
| Thomas_Atlas_LH_Pul.nii.gz                        | 1.16        | 7.57e-05        | -5.23e-05       | 2.04e-04        | .271        | 6.30e-05        | 7.94e-03        |
| Thomas_Atlas_LH_THALAMUS.nii.gz                   | 1.35        | 7.88e-05        | -3.55e-05       | 1.93e-04        | .243        | 8.57e-05        | 9.26e-03        |
| Thomas_Atlas_LH_VA.nii.gz                         | -0.14       | -9.40e-06       | -1.41e-04       | 1.22e-04        | .977        | 9.21e-07        | 9.60e-04        |
| Thomas_Atlas_LH_VLa.nii.gz                        | <0.01       | 2.69e-07        | -1.33e-04       | 1.33e-04        | 1.00        | 7.38e-10        | 2.72e-05        |
| Thomas_Atlas_LH_VLP.nii.gz                        | 0.71        | 3.75e-05        | -6.66e-05       | 1.42e-04        | .528        | 2.34e-05        | 4.84e-03        |
| Thomas_Atlas_LH_VLPd.nii.gz                       | 0.76        | 4.08e-05        | -6.50e-05       | 1.47e-04        | .550        | 2.68e-05        | 5.17e-03        |
| Thomas_Atlas_LH_VLPv.nii.gz                       | 0.53        | 3.11e-05        | -8.50e-05       | 1.47e-04        | .733        | 1.29e-05        | 3.60e-03        |
| Thomas_Atlas_LH_VPL.nii.gz                        | 0.79        | 4.43e-05        | -6.51e-05       | 1.54e-04        | .522        | 2.96e-05        | 5.44e-03        |
| Thomas_Atlas_RH_AV.nii.gz                         | 0.80        | 9.54e-05        | -1.37e-04       | 3.28e-04        | .463        | 3.04e-05        | 5.51e-03        |
| Thomas_Atlas_RH_CM.nii.gz                         | 0.79        | 4.81e-05        | -7.16e-05       | 1.68e-04        | .527        | 2.91e-05        | 5.39e-03        |
| <b>Thomas_Atlas_RH_Hb.nii.gz</b>                  | <b>2.14</b> | <b>2.73e-04</b> | <b>2.33e-05</b> | <b>5.23e-04</b> | <b>.039</b> | <b>2.15e-04</b> | <b>1.47e-02</b> |
| Thomas_Atlas_RH_LGN.nii.gz                        | 1.14        | 7.40e-05        | -5.37e-05       | 2.02e-04        | .313        | 6.05e-05        | 7.78e-03        |

**Table S17*****ET\_PRS Lead\_DBs Extended Associations with grey matter diffusion magnetic resonance imaging (dMRI) – Axial Diffusivity (AD)***

| Tract                           | <i>t</i> | $\beta$   | CI_low    | CI_up    | <i>p</i> | Eta2     | Cohens_f |
|---------------------------------|----------|-----------|-----------|----------|----------|----------|----------|
| Thomas_Atlas_RH_MD-Pf.nii.gz    | 1.47     | 1.10e-04  | -3.67e-05 | 2.57e-04 | .173     | 1.01e-04 | 1.01e-02 |
| Thomas_Atlas_RH_MGN.nii.gz      | 0.26     | 2.08e-05  | -1.36e-04 | 1.78e-04 | .875     | 3.16e-06 | 1.78e-03 |
| Thomas_Atlas_RH_MTT.nii.gz      | -0.14    | -1.23e-05 | -1.80e-04 | 1.55e-04 | .974     | 9.70e-07 | 9.85e-04 |
| Thomas_Atlas_RH_Pul.nii.gz      | 1.01     | 6.68e-05  | -6.30e-05 | 1.97e-04 | .383     | 4.77e-05 | 6.91e-03 |
| Thomas_Atlas_RH_THALAMUS.nii.gz | 1.08     | 6.46e-05  | -5.27e-05 | 1.82e-04 | .342     | 5.47e-05 | 7.40e-03 |
| Thomas_Atlas_RH_VA.nii.gz       | -0.03    | -1.96e-06 | -1.34e-04 | 1.30e-04 | 1.00     | 3.96e-08 | 1.99e-04 |
| Thomas_Atlas_RH_VLa.nii.gz      | 0.42     | 3.01e-05  | -1.12e-04 | 1.72e-04 | .829     | 8.09e-06 | 2.84e-03 |
| Thomas_Atlas_RH_VLP.nii.gz      | 0.71     | 3.85e-05  | -6.83e-05 | 1.45e-04 | .528     | 2.34e-05 | 4.84e-03 |
| Thomas_Atlas_RH_VLPd.nii.gz     | 0.92     | 5.06e-05  | -5.77e-05 | 1.59e-04 | .396     | 3.93e-05 | 6.27e-03 |
| Thomas_Atlas_RH_VLPv.nii.gz     | 0.33     | 1.99e-05  | -9.96e-05 | 1.39e-04 | .910     | 4.98e-06 | 2.23e-03 |
| Thomas_Atlas_RH_VPL.nii.gz      | 0.32     | 1.86e-05  | -9.36e-05 | 1.31e-04 | .912     | 4.93e-06 | 2.22e-03 |

*Note*\* *p* < .05, \*\* *p* < .01, \*\*\* *p* < .001, 95% CI(B)**Table S18*****ET PRS Associations with Cortical SURFACE AREA***

| Tract                          | <i>t</i> | $\beta$   | CI_low    | CI_up    | <i>p</i> | Eta2     | Cohens_f |
|--------------------------------|----------|-----------|-----------|----------|----------|----------|----------|
| Area_bankssts_L                | 1.32     | 7.37e-03  | -3.60e-03 | 1.83e-02 | .230     | 6.00e-05 | 7.74e-03 |
| Area_bankssts_R                | 1.69     | 9.48e-03  | -1.51e-03 | 2.05e-02 | .125     | 9.89e-05 | 9.94e-03 |
| Area_caudalanteriorcingulate_L | 0.97     | 5.57e-03  | -5.68e-03 | 1.68e-02 | .405     | 3.26e-05 | 5.71e-03 |
| Area_caudalanteriorcingulate_R | -0.62    | -3.53e-03 | -1.47e-02 | 7.66e-03 | .655     | 1.32e-05 | 3.64e-03 |
| Area_caudalmiddlefrontal_L     | -0.44    | -2.42e-03 | -1.33e-02 | 8.45e-03 | .810     | 6.57e-06 | 2.56e-03 |
| Area_caudalmiddlefrontal_R     | -0.16    | -8.93e-04 | -1.19e-02 | 1.01e-02 | 1.00     | 8.78e-07 | 9.37e-04 |
| Area_cuneus_L                  | -0.46    | -2.56e-03 | -1.34e-02 | 8.25e-03 | .707     | 7.45e-06 | 2.73e-03 |

Table S18

*ET PRS Associations with Cortical SURFACE AREA*

| Tract                          | <i>t</i>    | $\beta$         | CI_low          | CI_up           | <i>p</i>    | Eta2            | Cohens_f        |
|--------------------------------|-------------|-----------------|-----------------|-----------------|-------------|-----------------|-----------------|
| Area_cuneus_R                  | -0.24       | -1.30e-03       | -1.19e-02       | 9.34e-03        | .892        | 1.98e-06        | 1.41e-03        |
| Area_entorhinal_L              | 0.91        | 5.16e-03        | -5.96e-03       | 1.63e-02        | .499        | 2.86e-05        | 5.35e-03        |
| Area_entorhinal_R              | 0.68        | 3.82e-03        | -7.17e-03       | 1.48e-02        | .779        | 1.60e-05        | 4.00e-03        |
| Area_frontalpole_L             | 0.50        | 2.77e-03        | -7.99e-03       | 1.35e-02        | .750        | 8.82e-06        | 2.97e-03        |
| Area_frontalpole_R             | -0.43       | -2.32e-03       | -1.30e-02       | 8.35e-03        | .737        | 6.30e-06        | 2.51e-03        |
| Area_fusiform_L                | 1.22        | 6.33e-03        | -3.80e-03       | 1.65e-02        | .304        | 5.18e-05        | 7.20e-03        |
| Area_fusiform_R                | 0.93        | 4.70e-03        | -5.21e-03       | 1.46e-02        | .485        | 2.99e-05        | 5.47e-03        |
| <b>Area_inferiorparietal_L</b> | <b>2.22</b> | <b>1.22e-02</b> | <b>1.41e-03</b> | <b>2.30e-02</b> | <b>.039</b> | <b>1.70e-04</b> | <b>1.30e-02</b> |
| Area_inferiorparietal_R        | 1.79        | 9.47e-03        | -9.20e-04       | 1.99e-02        | .102        | 1.10e-04        | 1.05e-02        |
| Area_inferiortemporal_L        | 1.70        | 8.90e-03        | -1.39e-03       | 1.92e-02        | .099        | 9.94e-05        | 9.97e-03        |
| Area_inferiortemporal_R        | 1.89        | 9.77e-03        | -3.35e-04       | 1.99e-02        | .080        | 1.24e-04        | 1.11e-02        |
| Area_insula_L                  | 0.46        | 2.43e-03        | -7.87e-03       | 1.27e-02        | .769        | 7.39e-06        | 2.72e-03        |
| Area_insula_R                  | -0.77       | -3.99e-03       | -1.41e-02       | 6.14e-03        | .692        | 2.06e-05        | 4.54e-03        |
| Area_isthmuscingulate_L        | 1.21        | 6.35e-03        | -3.93e-03       | 1.66e-02        | .356        | 5.06e-05        | 7.11e-03        |
| Area_isthmuscingulate_R        | 1.97        | 1.05e-02        | 3.66e-05        | 2.09e-02        | .068        | 1.34e-04        | 1.16e-02        |
| <b>Area_lateraloccipital_L</b> | <b>2.35</b> | <b>1.24e-02</b> | <b>2.06e-03</b> | <b>2.27e-02</b> | <b>.026</b> | <b>1.91e-04</b> | <b>1.38e-02</b> |
| <b>Area_lateraloccipital_R</b> | <b>2.21</b> | <b>1.15e-02</b> | <b>1.30e-03</b> | <b>2.16e-02</b> | <b>.037</b> | <b>1.69e-04</b> | <b>1.30e-02</b> |
| Area_lateralorbitofrontal_L    | 0.79        | 4.12e-03        | -6.05e-03       | 1.43e-02        | .587        | 2.18e-05        | 4.67e-03        |
| Area_lateralorbitofrontal_R    | 0.58        | 3.02e-03        | -7.27e-03       | 1.33e-02        | .690        | 1.15e-05        | 3.38e-03        |
| Area_lingual_L                 | 1.49        | 8.29e-03        | -2.58e-03       | 1.92e-02        | .158        | 7.73e-05        | 8.79e-03        |
| Area_lingual_R                 | 1.60        | 8.89e-03        | -2.03e-03       | 1.98e-02        | .135        | 8.80e-05        | 9.38e-03        |
| Area_medialorbitofrontal_L     | 0.90        | 4.72e-03        | -5.53e-03       | 1.50e-02        | .448        | 2.82e-05        | 5.31e-03        |
| Area_medialorbitofrontal_R     | 1.54        | 7.91e-03        | -2.17e-03       | 1.80e-02        | .175        | 8.19e-05        | 9.05e-03        |
| Area_middletemporal_L          | 1.93        | 1.00e-02        | -1.80e-04       | 2.02e-02        | .060        | 1.28e-04        | 1.13e-02        |



**Table S18*****ET PRS Associations with Cortical SURFACE AREA***

| Tract                           | <i>t</i>    | $\beta$         | CI_low          | CI_up           | <i>p</i>    | Eta2            | Cohens_f        |
|---------------------------------|-------------|-----------------|-----------------|-----------------|-------------|-----------------|-----------------|
| Area_middletemporal_R           | 1.50        | 7.78e-03        | -2.40e-03       | 1.80e-02        | .164        | 7.75e-05        | 8.81e-03        |
| Area_paracentral_L              | 0.39        | 2.19e-03        | -8.69e-03       | 1.31e-02        | .848        | 5.37e-06        | 2.32e-03        |
| Area_paracentral_R              | -0.10       | -5.28e-04       | -1.13e-02       | 1.02e-02        | 1.00        | 3.20e-07        | 5.66e-04        |
| Area parahippocampal_L          | 1.81        | 1.00e-02        | -8.18e-04       | 2.09e-02        | .096        | 1.14e-04        | 1.07e-02        |
| Area parahippocampal_R          | 1.63        | 8.90e-03        | -1.83e-03       | 1.96e-02        | .143        | 9.14e-05        | 9.56e-03        |
| Area_parsopercularis_L          | -0.14       | -7.95e-04       | -1.18e-02       | 1.02e-02        | 1.00        | 6.91e-07        | 8.31e-04        |
| Area_parsopercularis_R          | 0.75        | 4.19e-03        | -6.80e-03       | 1.52e-02        | .625        | 1.93e-05        | 4.40e-03        |
| Area_parsorbitalis_L            | -0.03       | -1.39e-04       | -1.04e-02       | 1.02e-02        | 1.00        | 2.42e-08        | 1.56e-04        |
| Area_parsorbitalis_R            | 0.38        | 2.00e-03        | -8.21e-03       | 1.22e-02        | .771        | 5.11e-06        | 2.26e-03        |
| Area_parstriangularis_L         | -0.53       | -2.93e-03       | -1.37e-02       | 7.84e-03        | .654        | 9.80e-06        | 3.13e-03        |
| Area_parstriangularis_R         | -0.14       | -7.72e-04       | -1.15e-02       | 9.94e-03        | .996        | 6.90e-07        | 8.31e-04        |
| Area_pericalcarine_L            | -0.11       | -6.01e-04       | -1.18e-02       | 1.06e-02        | 1.00        | 3.82e-07        | 6.18e-04        |
| Area_pericalcarine_R            | 0.20        | 1.14e-03        | -1.00e-02       | 1.23e-02        | .926        | 1.38e-06        | 1.17e-03        |
| Area_postcentral_L              | 0.06        | 3.25e-04        | -9.96e-03       | 1.06e-02        | 1.00        | 1.33e-07        | 3.64e-04        |
| Area_postcentral_R              | -0.43       | -2.31e-03       | -1.27e-02       | 8.11e-03        | .731        | 6.52e-06        | 2.55e-03        |
| Area_posteriorcingulate_L       | -0.77       | -4.22e-03       | -1.50e-02       | 6.53e-03        | .532        | 2.05e-05        | 4.52e-03        |
| Area_posteriorcingulate_R       | 0.82        | 4.50e-03        | -6.28e-03       | 1.53e-02        | .568        | 2.31e-05        | 4.81e-03        |
| Area_precentral_L               | 1.75        | 9.10e-03        | -1.09e-03       | 1.93e-02        | .098        | 1.06e-04        | 1.03e-02        |
| <b>Area_precentral_R</b>        | <b>2.11</b> | <b>1.10e-02</b> | <b>7.88e-04</b> | <b>2.12e-02</b> | <b>.048</b> | <b>1.54e-04</b> | <b>1.24e-02</b> |
| Area_precuneus_L                | -0.24       | -1.27e-03       | -1.17e-02       | 9.13e-03        | .955        | 1.97e-06        | 1.41e-03        |
| Area_precuneus_R                | -0.51       | -2.69e-03       | -1.30e-02       | 7.58e-03        | .743        | 9.12e-06        | 3.02e-03        |
| Area_rostralanteriorcingulate_L | 0.63        | 3.43e-03        | -7.16e-03       | 1.40e-02        | .723        | 1.39e-05        | 3.73e-03        |
| Area_rostralanteriorcingulate_R | 0.45        | 2.52e-03        | -8.35e-03       | 1.34e-02        | .745        | 7.15e-06        | 2.67e-03        |
| Area_rostralmiddlefrontal_L     | 0.50        | 2.60e-03        | -7.54e-03       | 1.27e-02        | .677        | 8.73e-06        | 2.96e-03        |

**Table S18*****ET PRS Associations with Cortical SURFACE AREA***

| Tract                       | <i>t</i> | $\beta$   | CI_low    | CI_up    | <i>p</i> | Eta2     | Cohens_f |
|-----------------------------|----------|-----------|-----------|----------|----------|----------|----------|
| Area_rostralmiddlefrontal_R | -0.56    | -2.89e-03 | -1.31e-02 | 7.27e-03 | .705     | 1.08e-05 | 3.28e-03 |
| Area_superiorfrontal_L      | 1.75     | 9.05e-03  | -1.06e-03 | 1.92e-02 | .125     | 1.06e-04 | 1.03e-02 |
| Area_superiorfrontal_R      | 1.36     | 7.04e-03  | -3.11e-03 | 1.72e-02 | .273     | 6.39e-05 | 8.00e-03 |
| Area_superiorparietal_L     | -1.43    | -7.87e-03 | -1.87e-02 | 2.92e-03 | .210     | 7.07e-05 | 8.41e-03 |
| Area_superiorparietal_R     | -0.68    | -3.70e-03 | -1.44e-02 | 6.96e-03 | .546     | 1.60e-05 | 4.00e-03 |
| Area_superiortemporal_L     | 0.23     | 1.21e-03  | -8.87e-03 | 1.13e-02 | .896     | 1.90e-06 | 1.38e-03 |
| Area_superiortemporal_R     | -0.21    | -1.13e-03 | -1.15e-02 | 9.25e-03 | .990     | 1.56e-06 | 1.25e-03 |
| Area_supramarginal_L        | 0.24     | 1.26e-03  | -9.04e-03 | 1.16e-02 | .892     | 1.98e-06 | 1.41e-03 |
| Area_supramarginal_R        | 0.30     | 1.59e-03  | -8.97e-03 | 1.22e-02 | .938     | 3.02e-06 | 1.74e-03 |
| Area_transversetemporal_L   | 1.16     | 6.53e-03  | -4.50e-03 | 1.76e-02 | .371     | 4.66e-05 | 6.82e-03 |
| Area_transversetemporal_R   | -0.11    | -6.25e-04 | -1.16e-02 | 1.04e-02 | 1.00     | 4.29e-07 | 6.55e-04 |

*Note*\*  $p < .05$ , \*\*  $p < .01$ , \*\*\*  $p < .001$ , 95% CI(B)**Table S19*****ET PRS Associations with CORTICAL VOLUME***

| Tract                               | <i>t</i>     | $\beta$          | CI_low           | CI_up            | <i>p</i>    | Eta2            | Cohens_f        |
|-------------------------------------|--------------|------------------|------------------|------------------|-------------|-----------------|-----------------|
| Volume_bankssts_L                   | 0.29         | 1.68e-03         | -9.71e-03        | 1.31e-02         | .850        | 2.87e-06        | 1.70e-03        |
| Volume_bankssts_R                   | 1.00         | 5.79e-03         | -5.51e-03        | 1.71e-02         | .434        | 3.48e-05        | 5.90e-03        |
| Volume_caudalanteriorcingulate_L    | 1.33         | 7.72e-03         | -3.70e-03        | 1.91e-02         | .291        | 6.07e-05        | 7.79e-03        |
| Volume_caudalanteriorcingulate_R    | -1.44        | -8.39e-03        | -1.98e-02        | 3.02e-03         | .217        | 7.18e-05        | 8.47e-03        |
| <b>Volume_caudalmiddlefrontal_L</b> | <b>-2.75</b> | <b>-1.59e-02</b> | <b>-2.71e-02</b> | <b>-4.56e-03</b> | <b>.011</b> | <b>2.62e-04</b> | <b>1.62e-02</b> |
| <b>Volume_caudalmiddlefrontal_R</b> | <b>-2.42</b> | <b>-1.40e-02</b> | <b>-2.53e-02</b> | <b>-2.65e-03</b> | <b>.021</b> | <b>2.02e-04</b> | <b>1.42e-02</b> |
| <b>Volume_cuneus_L</b>              | <b>-2.55</b> | <b>-1.49e-02</b> | <b>-2.64e-02</b> | <b>-3.46e-03</b> | <b>.017</b> | <b>2.25e-04</b> | <b>1.50e-02</b> |
| Volume_cuneus_R                     | -1.72        | -1.01e-02        | -2.16e-02        | 1.43e-03         | .118        | 1.02e-04        | 1.01e-02        |

**Table S19*****ET PRS Associations with CORTICAL VOLUME***

| Tract                         | <i>t</i> | $\beta$   | CI_low    | CI_up    | <i>p</i> | Eta2     | Cohens_f |
|-------------------------------|----------|-----------|-----------|----------|----------|----------|----------|
| Volume_entorhinal_L           | 0.67     | 3.90e-03  | -7.58e-03 | 1.54e-02 | .556     | 1.54e-05 | 3.92e-03 |
| Volume_entorhinal_R           | 0.82     | 4.78e-03  | -6.69e-03 | 1.62e-02 | .513     | 2.31e-05 | 4.80e-03 |
| Volume_frontalpole_L          | 0.03     | 1.57e-04  | -1.11e-02 | 1.14e-02 | 1.00     | 2.59e-08 | 1.61e-04 |
| Volume_frontalpole_R          | -0.63    | -3.60e-03 | -1.49e-02 | 7.69e-03 | .585     | 1.35e-05 | 3.68e-03 |
| Volume_fusiform_L             | -0.53    | -3.07e-03 | -1.43e-02 | 8.19e-03 | .652     | 9.88e-06 | 3.14e-03 |
| Volume_fusiform_R             | -1.63    | -9.37e-03 | -2.06e-02 | 1.89e-03 | .162     | 9.20e-05 | 9.59e-03 |
| Volume_inferiorparietal_L     | 0.71     | 4.05e-03  | -7.20e-03 | 1.53e-02 | .587     | 1.72e-05 | 4.15e-03 |
| Volume_inferiorparietal_R     | 0.74     | 4.24e-03  | -7.01e-03 | 1.55e-02 | .562     | 1.89e-05 | 4.34e-03 |
| Volume_inferiortemporal_L     | 0.26     | 1.48e-03  | -9.88e-03 | 1.28e-02 | .879     | 2.25e-06 | 1.50e-03 |
| Volume_inferiortemporal_R     | 0.41     | 2.36e-03  | -8.98e-03 | 1.37e-02 | .752     | 5.75e-06 | 2.40e-03 |
| Volume_insula_L               | -1.26    | -7.39e-03 | -1.89e-02 | 4.08e-03 | .568     | 5.52e-05 | 7.43e-03 |
| Volume_insula_R               | -1.92    | -1.13e-02 | -2.28e-02 | 2.26e-04 | .086     | 1.28e-04 | 1.13e-02 |
| Volume_isthmuscingulate_L     | -0.86    | -5.05e-03 | -1.65e-02 | 6.39e-03 | .473     | 2.59e-05 | 5.09e-03 |
| Volume_isthmuscingulate_R     | 0.20     | 1.20e-03  | -1.03e-02 | 1.27e-02 | .922     | 1.44e-06 | 1.20e-03 |
| Volume_lateraloccipital_L     | 0.32     | 1.87e-03  | -9.46e-03 | 1.32e-02 | .912     | 3.62e-06 | 1.90e-03 |
| Volume_lateraloccipital_R     | 0.69     | 4.00e-03  | -7.33e-03 | 1.53e-02 | .597     | 1.66e-05 | 4.07e-03 |
| Volume_lateralorbitofrontal_L | -0.50    | -2.87e-03 | -1.40e-02 | 8.31e-03 | .687     | 8.74e-06 | 2.96e-03 |
| Volume_lateralorbitofrontal_R | -1.04    | -5.95e-03 | -1.72e-02 | 5.25e-03 | .378     | 3.75e-05 | 6.13e-03 |
| Volume_lingual_L              | -0.29    | -1.67e-03 | -1.31e-02 | 9.73e-03 | .851     | 2.86e-06 | 1.69e-03 |
| Volume_lingual_R              | 0.56     | 3.26e-03  | -8.17e-03 | 1.47e-02 | .634     | 1.08e-05 | 3.29e-03 |
| Volume_medialorbitofrontal_L  | -0.66    | -3.81e-03 | -1.51e-02 | 7.52e-03 | .561     | 1.50e-05 | 3.87e-03 |
| Volume_medialorbitofrontal_R  | -0.71    | -4.09e-03 | -1.54e-02 | 7.19e-03 | .583     | 1.75e-05 | 4.18e-03 |
| Volume_middletemporal_L       | 0.37     | 2.11e-03  | -9.07e-03 | 1.33e-02 | .870     | 4.72e-06 | 2.17e-03 |
| Volume_middletemporal_R       | 0.10     | 5.44e-04  | -1.06e-02 | 1.17e-02 | 1.00     | 3.14e-07 | 5.61e-04 |

Table S19

*ET PRS Associations with CORTICAL VOLUME*

| Tract                                | <i>t</i>     | $\beta$          | CI_low           | CI_up            | <i>p</i>    | Eta2            | Cohens_f        |
|--------------------------------------|--------------|------------------|------------------|------------------|-------------|-----------------|-----------------|
| Volume_paracentral_L                 | -1.37        | -7.72e-03        | -1.88e-02        | 3.35e-03         | .236        | 6.46e-05        | 8.04e-03        |
| Volume_paracentral_R                 | -2.07        | -1.19e-02        | -2.31e-02        | -6.18e-04        | .053        | 1.48e-04        | 1.22e-02        |
| Volume parahippocampal_L             | -0.20        | -1.11e-03        | -1.21e-02        | 9.84e-03         | .927        | 1.36e-06        | 1.17e-03        |
| Volume parahippocampal_R             | 0.51         | 2.85e-03         | -8.11e-03        | 1.38e-02         | .671        | 9.00e-06        | 3.00e-03        |
| Volume_parsopercularis_L             | -1.77        | -1.01e-02        | -2.13e-02        | 1.08e-03         | .140        | 1.08e-04        | 1.04e-02        |
| Volume_parsopercularis_R             | -0.75        | -4.32e-03        | -1.56e-02        | 6.93e-03         | .497        | 1.96e-05        | 4.43e-03        |
| Volume_parsorbitalis_L               | -1.70        | -9.76e-03        | -2.10e-02        | 1.49e-03         | .163        | 1.00e-04        | 1.00e-02        |
| Volume_parsorbitalis_R               | -0.66        | -3.80e-03        | -1.50e-02        | 7.41e-03         | .696        | 1.53e-05        | 3.91e-03        |
| Volume_parstriangularis_L            | -2.20        | -1.27e-02        | -2.39e-02        | -1.39e-03        | .051        | 1.68e-04        | 1.29e-02        |
| Volume_parstriangularis_R            | -1.56        | -8.96e-03        | -2.03e-02        | 2.33e-03         | .188        | 8.37e-05        | 9.15e-03        |
| Volume_pericalcarine_L               | -1.32        | -7.76e-03        | -1.93e-02        | 3.75e-03         | .228        | 6.04e-05        | 7.77e-03        |
| Volume_pericalcarine_R               | -1.29        | -7.59e-03        | -1.91e-02        | 3.92e-03         | .270        | 5.78e-05        | 7.60e-03        |
| Volume_postcentral_L                 | -0.55        | -3.18e-03        | -1.45e-02        | 8.10e-03         | .639        | 1.05e-05        | 3.25e-03        |
| Volume_postcentral_R                 | -1.88        | -1.08e-02        | -2.21e-02        | 4.45e-04         | .073        | 1.23e-04        | 1.11e-02        |
| <b>Volume_posteriorcingulate_L</b>   | <b>-2.61</b> | <b>-1.52e-02</b> | <b>-2.67e-02</b> | <b>-3.80e-03</b> | <b>.017</b> | <b>2.36e-04</b> | <b>1.54e-02</b> |
| Volume_posteriorcingulate_R          | -0.59        | -3.42e-03        | -1.48e-02        | 7.93e-03         | .679        | 1.20e-05        | 3.47e-03        |
| Volume_precentral_L                  | -0.96        | -5.46e-03        | -1.66e-02        | 5.65e-03         | .410        | 3.20e-05        | 5.66e-03        |
| Volume_precentral_R                  | -0.90        | -5.10e-03        | -1.62e-02        | 6.05e-03         | .509        | 2.78e-05        | 5.27e-03        |
| <b>Volume_precuneus_L</b>            | <b>-2.41</b> | <b>-1.36e-02</b> | <b>-2.47e-02</b> | <b>-2.53e-03</b> | <b>.022</b> | <b>2.00e-04</b> | <b>1.42e-02</b> |
| <b>Volume_precuneus_R</b>            | <b>-2.67</b> | <b>-1.52e-02</b> | <b>-2.64e-02</b> | <b>-4.05e-03</b> | <b>.014</b> | <b>2.46e-04</b> | <b>1.57e-02</b> |
| Volume_rostralanteriorcingulate_L    | -0.32        | -1.88e-03        | -1.33e-02        | 9.57e-03         | 1.00        | 3.58e-06        | 1.89e-03        |
| Volume_rostralanteriorcingulate_R    | 0.45         | 2.62e-03         | -8.86e-03        | 1.41e-02         | .720        | 6.93e-06        | 2.63e-03        |
| Volume_rostralmiddlefrontal_L        | -1.26        | -7.16e-03        | -1.83e-02        | 3.94e-03         | .284        | 5.52e-05        | 7.43e-03        |
| <b>Volume_rostralmiddlefrontal_R</b> | <b>-2.29</b> | <b>-1.31e-02</b> | <b>-2.42e-02</b> | <b>-1.89e-03</b> | <b>.034</b> | <b>1.82e-04</b> | <b>1.35e-02</b> |

**Table S19*****ET PRS Associations with CORTICAL VOLUME***

| Tract                            | <i>t</i>     | $\beta$          | CI_low           | CI_up            | <i>p</i>         | Eta2            | Cohens_f        |
|----------------------------------|--------------|------------------|------------------|------------------|------------------|-----------------|-----------------|
| Volume_superiorfrontal_L         | -1.28        | -7.20e-03        | -1.82e-02        | 3.84e-03         | .277             | 5.65e-05        | 7.52e-03        |
| Volume_superiorfrontal_R         | -1.70        | -9.63e-03        | -2.07e-02        | 1.46e-03         | .139             | 1.00e-04        | 1.00e-02        |
| <b>Volume_superiorparietal_L</b> | <b>-3.90</b> | <b>-2.21e-02</b> | <b>-3.32e-02</b> | <b>-1.10e-02</b> | <b>&lt; .001</b> | <b>5.25e-04</b> | <b>2.29e-02</b> |
| <b>Volume_superiorparietal_R</b> | <b>-3.36</b> | <b>-1.90e-02</b> | <b>-3.01e-02</b> | <b>-7.93e-03</b> | <b>.001</b>      | <b>3.91e-04</b> | <b>1.98e-02</b> |
| Volume_superiortemporal_L        | -1.01        | -5.76e-03        | -1.70e-02        | 5.47e-03         | .433             | 3.50e-05        | 5.91e-03        |
| Volume_superiortemporal_R        | -1.43        | -8.13e-03        | -1.92e-02        | 2.98e-03         | .185             | 7.12e-05        | 8.44e-03        |
| Volume_supramarginal_L           | -0.91        | -5.30e-03        | -1.66e-02        | 6.05e-03         | .495             | 2.89e-05        | 5.38e-03        |
| Volume_supramarginal_R           | -1.04        | -5.99e-03        | -1.73e-02        | 5.36e-03         | .413             | 3.70e-05        | 6.09e-03        |
| Volume_transversetemporal_L      | 0.07         | 3.99e-04         | -1.11e-02        | 1.19e-02         | 1.00             | 1.61e-07        | 4.02e-04        |
| Volume_transversetemporal_R      | -1.00        | -5.85e-03        | -1.73e-02        | 5.59e-03         | .435             | 3.47e-05        | 5.89e-03        |

*Note*\*  $p < .05$ , \*\*  $p < .01$ , \*\*\*  $p < .001$ , 95% CI(B)**Table S20*****ET PRS Associations with CORTICAL THICKNESS***

| Tract                                    | <i>t</i> | $\beta$   | CI_low    | CI_up    | <i>p</i> | Eta2     | Cohens_f |
|------------------------------------------|----------|-----------|-----------|----------|----------|----------|----------|
| Mean_thickness_bankssts_L                | 0.77     | 4.45e-03  | -6.88e-03 | 1.58e-02 | .540     | 2.05e-05 | 4.53e-03 |
| Mean_thickness_bankssts_R                | 1.22     | 7.02e-03  | -4.26e-03 | 1.83e-02 | .272     | 5.15e-05 | 7.17e-03 |
| Mean_thickness_caudalanteriorcingulate_L | 0.99     | 5.81e-03  | -5.64e-03 | 1.73e-02 | .503     | 3.42e-05 | 5.84e-03 |
| Mean_thickness_caudalanteriorcingulate_R | -0.47    | -2.73e-03 | -1.42e-02 | 8.71e-03 | .704     | 7.58e-06 | 2.75e-03 |
| Mean_thickness_caudalmiddlefrontal_L     | -1.29    | -7.14e-03 | -1.80e-02 | 3.75e-03 | .219     | 5.71e-05 | 7.56e-03 |
| Mean_thickness_caudalmiddlefrontal_R     | -1.61    | -9.01e-03 | -1.99e-02 | 1.93e-03 | .130     | 9.01e-05 | 9.49e-03 |
| Mean_thickness_cuneus_L                  | -1.33    | -7.75e-03 | -1.91e-02 | 3.65e-03 | .223     | 6.14e-05 | 7.84e-03 |
| Mean_thickness_cuneus_R                  | 0.03     | 1.89e-04  | -1.12e-02 | 1.16e-02 | 1.00     | 3.64e-08 | 1.91e-04 |
| Mean_thickness_entorhinal_L              | 0.93     | 5.34e-03  | -5.89e-03 | 1.66e-02 | .430     | 3.00e-05 | 5.48e-03 |

**Table S20*****ET PRS Associations with CORTICAL THICKNESS***

| Tract                                 | <i>t</i> | $\beta$   | CI_low    | CI_up    | <i>p</i> | Eta2     | Cohens_f |
|---------------------------------------|----------|-----------|-----------|----------|----------|----------|----------|
| Mean_thickness_entorhinal_R           | 0.68     | 3.90e-03  | -7.38e-03 | 1.52e-02 | .548     | 1.59e-05 | 3.98e-03 |
| Mean_thickness_frontalpole_L          | 0.62     | 3.56e-03  | -7.77e-03 | 1.49e-02 | .592     | 1.31e-05 | 3.62e-03 |
| Mean_thickness_frontalpole_R          | 1.61     | 9.30e-03  | -2.03e-03 | 2.06e-02 | .148     | 8.94e-05 | 9.46e-03 |
| Mean_thickness_fusiform_L             | 0.08     | 4.62e-04  | -1.07e-02 | 1.16e-02 | 1.00     | 2.28e-07 | 4.78e-04 |
| Mean_thickness_fusiform_R             | -0.48    | -2.73e-03 | -1.38e-02 | 8.36e-03 | .692     | 8.06e-06 | 2.84e-03 |
| Mean_thickness_inferiorparietal_L     | -0.08    | -4.20e-04 | -1.13e-02 | 1.04e-02 | 1.00     | 1.98e-07 | 4.45e-04 |
| Mean_thickness_inferiorparietal_R     | 0.68     | 3.72e-03  | -7.04e-03 | 1.45e-02 | .609     | 1.58e-05 | 3.98e-03 |
| Mean_thickness_inferiortemporal_L     | 0.48     | 2.79e-03  | -8.54e-03 | 1.41e-02 | .770     | 8.04e-06 | 2.84e-03 |
| Mean_thickness_inferiortemporal_R     | -0.02    | -1.09e-04 | -1.14e-02 | 1.12e-02 | 1.00     | 1.23e-08 | 1.11e-04 |
| Mean_thickness_insula_L               | -0.37    | -2.15e-03 | -1.35e-02 | 9.20e-03 | .782     | 4.75e-06 | 2.18e-03 |
| Mean_thickness_insula_R               | 0.64     | 3.70e-03  | -7.66e-03 | 1.51e-02 | .576     | 1.41e-05 | 3.75e-03 |
| Mean_thickness_isthmuscingulate_L     | -0.51    | -2.95e-03 | -1.42e-02 | 8.35e-03 | .744     | 9.04e-06 | 3.01e-03 |
| Mean_thickness_isthmuscingulate_R     | -1.59    | -9.13e-03 | -2.04e-02 | 2.15e-03 | .177     | 8.70e-05 | 9.33e-03 |
| Mean_thickness_lateraloccipital_L     | -0.38    | -2.17e-03 | -1.35e-02 | 9.14e-03 | .777     | 4.90e-06 | 2.21e-03 |
| Mean_thickness_lateraloccipital_R     | 0.52     | 2.97e-03  | -8.33e-03 | 1.43e-02 | .667     | 9.19e-06 | 3.03e-03 |
| Mean_thickness_lateralorbitofrontal_L | 1.60     | 9.27e-03  | -2.07e-03 | 2.06e-02 | .120     | 8.88e-05 | 9.42e-03 |
| Mean_thickness_lateralorbitofrontal_R | 0.23     | 1.31e-03  | -1.01e-02 | 1.27e-02 | .903     | 1.77e-06 | 1.33e-03 |
| Mean_thickness_lingual_L              | -0.23    | -1.31e-03 | -1.26e-02 | 1.00e-02 | .903     | 1.76e-06 | 1.33e-03 |
| Mean_thickness_lingual_R              | 1.19     | 6.96e-03  | -4.46e-03 | 1.84e-02 | .319     | 4.93e-05 | 7.02e-03 |
| Mean_thickness_medialorbitofrontal_L  | 1.46     | 8.48e-03  | -2.88e-03 | 1.98e-02 | .158     | 7.39e-05 | 8.60e-03 |
| Mean_thickness_medialorbitofrontal_R  | -0.23    | -1.31e-03 | -1.27e-02 | 1.01e-02 | .904     | 1.76e-06 | 1.33e-03 |
| Mean_thickness_middletemporal_L       | -0.30    | -1.68e-03 | -1.29e-02 | 9.51e-03 | .845     | 3.01e-06 | 1.74e-03 |
| Mean_thickness_middletemporal_R       | 0.76     | 4.35e-03  | -6.82e-03 | 1.55e-02 | .544     | 2.02e-05 | 4.49e-03 |
| Mean_thickness_paracentral_L          | -0.50    | -2.82e-03 | -1.38e-02 | 8.20e-03 | .677     | 8.70e-06 | 2.95e-03 |

**Table S20*****ET PRS Associations with CORTICAL THICKNESS***

| Tract                                     | <i>t</i> | $\beta$   | CI_low    | CI_up    | <i>p</i> | Eta2     | Cohens_f |
|-------------------------------------------|----------|-----------|-----------|----------|----------|----------|----------|
| Mean_thickness_paracentral_R              | -0.55    | -3.08e-03 | -1.41e-02 | 7.97e-03 | .715     | 1.03e-05 | 3.21e-03 |
| Mean_thickness parahippocampal_L          | -0.30    | -1.72e-03 | -1.30e-02 | 9.59e-03 | .842     | 3.07e-06 | 1.75e-03 |
| Mean_thickness parahippocampal_R          | 0.87     | 4.99e-03  | -6.27e-03 | 1.63e-02 | .471     | 2.61e-05 | 5.11e-03 |
| Mean_thickness_parsopercularis_L          | -0.05    | -3.04e-04 | -1.13e-02 | 1.07e-02 | 1.00     | 1.02e-07 | 3.19e-04 |
| Mean_thickness_parsopercularis_R          | 0.04     | 2.02e-04  | -1.08e-02 | 1.12e-02 | 1.00     | 4.45e-08 | 2.11e-04 |
| Mean_thickness_parsorbitalis_L            | -0.13    | -7.23e-04 | -1.19e-02 | 1.05e-02 | .989     | 5.53e-07 | 7.44e-04 |
| Mean_thickness_parsorbitalis_R            | 0.08     | 4.46e-04  | -1.07e-02 | 1.16e-02 | 1.00     | 2.13e-07 | 4.61e-04 |
| Mean_thickness_parstriangularis_L         | -0.05    | -3.01e-04 | -1.13e-02 | 1.07e-02 | 1.00     | 9.97e-08 | 3.16e-04 |
| Mean_thickness_parstriangularis_R         | 0.02     | 1.18e-04  | -1.08e-02 | 1.11e-02 | 1.00     | 1.54e-08 | 1.24e-04 |
| Mean_thickness_pericalcarine_L            | -0.40    | -2.33e-03 | -1.37e-02 | 9.07e-03 | .758     | 5.54e-06 | 2.35e-03 |
| Mean_thickness_pericalcarine_R            | -0.64    | -3.71e-03 | -1.51e-02 | 7.70e-03 | .683     | 1.40e-05 | 3.74e-03 |
| Mean_thickness_postcentral_L              | 1.68     | 9.48e-03  | -1.59e-03 | 2.06e-02 | .103     | 9.73e-05 | 9.87e-03 |
| Mean_thickness_postcentral_R              | 0.57     | 3.21e-03  | -7.88e-03 | 1.43e-02 | .628     | 1.11e-05 | 3.33e-03 |
| Mean_thickness_posteriorcingulate_L       | 0.11     | 6.48e-04  | -1.07e-02 | 1.20e-02 | 1.00     | 4.32e-07 | 6.57e-04 |
| Mean_thickness_posteriorcingulate_R       | -0.59    | -3.43e-03 | -1.47e-02 | 7.88e-03 | .608     | 1.22e-05 | 3.49e-03 |
| Mean_thickness_precentral_L               | -0.56    | -3.09e-03 | -1.39e-02 | 7.76e-03 | .634     | 1.08e-05 | 3.28e-03 |
| Mean_thickness_precentral_R               | -1.06    | -5.87e-03 | -1.67e-02 | 4.98e-03 | .318     | 3.89e-05 | 6.24e-03 |
| Mean_thickness_precuneus_L                | -0.36    | -1.99e-03 | -1.29e-02 | 8.89e-03 | .792     | 4.44e-06 | 2.11e-03 |
| Mean_thickness_precuneus_R                | 0.02     | 8.65e-05  | -1.08e-02 | 1.10e-02 | 1.00     | 8.35e-09 | 9.14e-05 |
| Mean_thickness_rostralanteriorcingulate_L | -0.51    | -2.93e-03 | -1.42e-02 | 8.39e-03 | .748     | 8.88e-06 | 2.98e-03 |
| Mean_thickness_rostralanteriorcingulate_R | 2.00     | 1.18e-02  | 2.50e-04  | 2.33e-02 | .124     | 1.39e-04 | 1.18e-02 |
| Mean_thickness_rostralmiddlefrontal_L     | -0.26    | -1.42e-03 | -1.22e-02 | 9.33e-03 | .875     | 2.32e-06 | 1.52e-03 |
| Mean_thickness_rostralmiddlefrontal_R     | -0.24    | -1.31e-03 | -1.22e-02 | 9.59e-03 | .895     | 1.92e-06 | 1.39e-03 |
| Mean_thickness_superiorfrontal_L          | -1.64    | -8.82e-03 | -1.93e-02 | 1.69e-03 | .110     | 9.35e-05 | 9.67e-03 |

**Table S20*****ET PRS Associations with CORTICAL THICKNESS***

| Tract                                   | <i>t</i>     | $\beta$          | CI_low           | CI_up            | <i>p</i>    | Eta2            | Cohens_f        |
|-----------------------------------------|--------------|------------------|------------------|------------------|-------------|-----------------|-----------------|
| <b>Mean_thickness_superiorfrontal_R</b> | <b>-2.04</b> | <b>-1.10e-02</b> | <b>-2.16e-02</b> | <b>-4.55e-04</b> | <b>.045</b> | <b>1.44e-04</b> | <b>1.20e-02</b> |
| Mean_thickness_superiorparietal_L       | -0.94        | -5.30e-03        | -1.63e-02        | 5.70e-03         | .422        | 3.08e-05        | 5.55e-03        |
| Mean_thickness_superiorparietal_R       | -1.26        | -7.05e-03        | -1.80e-02        | 3.91e-03         | .254        | 5.49e-05        | 7.41e-03        |
| Mean_thickness_superiortemporal_L       | 0.28         | 1.55e-03         | -9.33e-03        | 1.24e-02         | .954        | 2.69e-06        | 1.64e-03        |
| Mean_thickness_superiortemporal_R       | 1.01         | 5.53e-03         | -5.22e-03        | 1.63e-02         | .365        | 3.51e-05        | 5.93e-03        |
| Mean_thickness_supramarginal_L          | 0.01         | 7.78e-05         | -1.07e-02        | 1.09e-02         | 1.00        | 6.90e-09        | 8.31e-05        |
| Mean_thickness_supramarginal_R          | 0.48         | 2.68e-03         | -8.17e-03        | 1.35e-02         | .768        | 8.08e-06        | 2.84e-03        |
| Mean_thickness_transversetemporal_L     | 0.20         | 1.20e-03         | -1.03e-02        | 1.27e-02         | .922        | 1.45e-06        | 1.20e-03        |
| Mean_thickness_transversetemporal_R     | 0.58         | 3.42e-03         | -8.07e-03        | 1.49e-02         | .649        | 1.17e-05        | 3.43e-03        |

*Note*\*  $p < .05$ , \*\*  $p < .01$ , \*\*\*  $p < .001$ , 95% CI(B)**Table S21*****ET PRS Associations with SUBCORTICAL VOLUME***

| Tract                                  | <i>t</i> | $\beta$   | CI_low    | CI_up     | <i>p</i> | Eta2     | Cohens_f |
|----------------------------------------|----------|-----------|-----------|-----------|----------|----------|----------|
| Vol_Amyg_Accessory_Basal_nucleus_L     | -1.92    | -1.05e-02 | -2.11e-02 | 2.30e-04  | .083     | 1.11e-04 | 1.13e-02 |
| Vol_Amyg_Accessory_Basal_nucleus_R     | -0.28    | -1.56e-03 | -1.23e-02 | 9.22e-03  | .958     | 2.46e-06 | 1.67e-03 |
| Vol_Amyg_Anterior_amygdaloid_area_Left | -1.08    | -6.12e-03 | -1.73e-02 | 5.02e-03  | .317     | 3.77e-05 | 6.33e-03 |
| Vol_Amyg_Anterior_amygdaloid_area_R    | 0.21     | 1.18e-03  | -9.89e-03 | 1.23e-02  | .939     | 1.41e-06 | 1.23e-03 |
| Vol_Amyg_Basal_nucleus_L               | -1.04    | -5.89e-03 | -1.70e-02 | 5.21e-03  | .379     | 3.48e-05 | 6.12e-03 |
| Vol_Amyg_Basal_nucleus_R               | 0.57     | 3.23e-03  | -7.84e-03 | 1.43e-02  | .729     | 1.05e-05 | 3.36e-03 |
| Vol_Amyg_Central_nucleus_L             | -0.62    | -3.62e-03 | -1.50e-02 | 7.77e-03  | .800     | 1.31e-05 | 3.66e-03 |
| Vol_Amyg_Central_nucleus_R             | 0.02     | 1.11e-04  | -1.12e-02 | 1.14e-02  | 1.00     | 1.24e-08 | 1.13e-04 |
| Vol_Amyg_Cortical_nucleus_L            | -2.00    | -1.12e-02 | -2.21e-02 | -2.33e-04 | .082     | 1.26e-04 | 1.18e-02 |
| Vol_Amyg_Cortical_nucleus_R            | -1.68    | -9.39e-03 | -2.03e-02 | 1.55e-03  | .139     | 8.93e-05 | 9.89e-03 |



**Table S21**

***ET PRS Associations with SUBCORTICAL VOLUME***

| Tract                             | <i>t</i> | $\beta$   | CI_low    | CI_up     | <i>p</i> | Eta2     | Cohens_f |
|-----------------------------------|----------|-----------|-----------|-----------|----------|----------|----------|
| Vol_Amyg_Lateral_Nucleus_L        | 1.01     | 5.71e-03  | -5.41e-03 | 1.68e-02  | .404     | 3.28e-05 | 5.92e-03 |
| Vol_Amyg_Lateral_Nucleus_R        | 1.91     | 1.08e-02  | -2.73e-04 | 2.18e-02  | .084     | 1.17e-04 | 1.12e-02 |
| Vol_Amyg_Medial_nucleus_L         | -0.78    | -4.47e-03 | -1.57e-02 | 6.75e-03  | .559     | 2.01e-05 | 4.59e-03 |
| Vol_Amyg_Medial_nucleus_R         | -0.62    | -3.55e-03 | -1.48e-02 | 7.73e-03  | .690     | 1.27e-05 | 3.63e-03 |
| Vol_Amyg_Paralaminar_nucleus_L    | 0.01     | 3.91e-05  | -1.13e-02 | 1.14e-02  | 1.00     | 1.53e-09 | 3.97e-05 |
| Vol_Amyg_Paralaminar_nucleus_R    | 1.10     | 6.39e-03  | -4.97e-03 | 1.78e-02  | .405     | 4.10e-05 | 6.49e-03 |
| Vol_Corticoamygdaloid_transitio_L | -0.93    | -5.12e-03 | -1.59e-02 | 5.67e-03  | .529     | 2.65e-05 | 5.47e-03 |
| Vol_Corticoamygdaloid_transitio_R | -0.08    | -4.26e-04 | -1.13e-02 | 1.04e-02  | 1.00     | 1.84e-07 | 4.53e-04 |
| Vol_Whole_amygdala_R              | 0.80     | 4.44e-03  | -6.42e-03 | 1.53e-02  | .544     | 2.00e-05 | 4.71e-03 |
| Volume_AV_L                       | -0.73    | -4.21e-03 | -1.56e-02 | 7.14e-03  | .600     | 1.78e-05 | 4.28e-03 |
| Volume_AV_R                       | 1.12     | 6.49e-03  | -4.90e-03 | 1.79e-02  | .340     | 4.23e-05 | 6.56e-03 |
| Volume_CA1_Body_L                 | -0.22    | -1.24e-03 | -1.21e-02 | 9.64e-03  | .926     | 1.55e-06 | 1.31e-03 |
| Volume_CA1_Body_R                 | 0.02     | 1.03e-04  | -1.08e-02 | 1.10e-02  | 1.00     | 1.07e-08 | 1.08e-04 |
| Volume_CA1_head_L                 | -2.02    | -1.11e-02 | -2.19e-02 | -3.45e-04 | .055     | 1.25e-04 | 1.19e-02 |
| Volume_CA1_head_R                 | -0.96    | -5.31e-03 | -1.61e-02 | 5.51e-03  | .378     | 2.86e-05 | 5.66e-03 |
| Volume_CA3_Body_L                 | -0.15    | -8.62e-04 | -1.21e-02 | 1.04e-02  | .991     | 7.47e-07 | 8.84e-04 |
| Volume_CA3_Body_R                 | -0.11    | -6.09e-04 | -1.18e-02 | 1.06e-02  | 1.00     | 3.73e-07 | 6.28e-04 |
| Volume_CA3_head_L                 | -0.71    | -3.99e-03 | -1.50e-02 | 6.96e-03  | .534     | 1.62e-05 | 4.20e-03 |
| Volume_CA3_head_R                 | -1.05    | -5.88e-03 | -1.69e-02 | 5.10e-03  | .331     | 3.50e-05 | 6.17e-03 |
| Volume_CA4_Body_L                 | -0.68    | -3.83e-03 | -1.48e-02 | 7.15e-03  | .556     | 1.48e-05 | 4.02e-03 |
| Volume_CA4_Body_R                 | 0.38     | 2.12e-03  | -8.91e-03 | 1.31e-02  | 1.00     | 4.52e-06 | 2.22e-03 |
| Volume_CA4_head_L                 | -1.05    | -5.94e-03 | -1.70e-02 | 5.12e-03  | .376     | 3.55e-05 | 6.19e-03 |
| Volume_CA4_head_R                 | -1.32    | -7.51e-03 | -1.87e-02 | 3.67e-03  | .311     | 5.67e-05 | 7.74e-03 |
| Volume_CeM_L                      | -0.55    | -3.05e-03 | -1.40e-02 | 7.86e-03  | .657     | 9.36e-06 | 3.22e-03 |

**Table S21*****ET PRS Associations with SUBCORTICAL VOLUME***

| Tract                        | <i>t</i> | $\beta$   | CI_low    | CI_up    | <i>p</i> | Eta2     | Cohens_f |
|------------------------------|----------|-----------|-----------|----------|----------|----------|----------|
| Volume_CeM_R                 | 0.80     | 4.44e-03  | -6.43e-03 | 1.53e-02 | .477     | 1.99e-05 | 4.70e-03 |
| Volume_CL_L                  | -0.31    | -1.84e-03 | -1.33e-02 | 9.64e-03 | .848     | 3.38e-06 | 1.84e-03 |
| Volume_CL_R                  | 0.98     | 5.71e-03  | -5.75e-03 | 1.72e-02 | .370     | 3.27e-05 | 5.74e-03 |
| Volume_CM_L                  | -0.05    | -3.11e-04 | -1.18e-02 | 1.11e-02 | 1.00     | 9.66e-08 | 3.13e-04 |
| Volume_CM_R                  | -0.16    | -9.66e-04 | -1.25e-02 | 1.05e-02 | 1.00     | 9.33e-07 | 9.70e-04 |
| Volume_fimbria_L             | -1.11    | -6.12e-03 | -1.69e-02 | 4.67e-03 | .299     | 3.80e-05 | 6.54e-03 |
| Volume_fimbria_R             | -0.80    | -4.40e-03 | -1.51e-02 | 6.34e-03 | .503     | 1.97e-05 | 4.72e-03 |
| Volume_GC_ML_DG_Body_L       | -0.53    | -2.84e-03 | -1.34e-02 | 7.71e-03 | .768     | 8.19e-06 | 3.10e-03 |
| Volume_GC_ML_DG_Body_R       | -0.07    | -3.76e-04 | -1.11e-02 | 1.03e-02 | 1.00     | 1.43e-07 | 4.05e-04 |
| Volume_GC_ML_DG_head_L       | -0.71    | -3.94e-03 | -1.48e-02 | 6.91e-03 | .536     | 1.57e-05 | 4.18e-03 |
| Volume_GC_ML_DG_head_R       | -1.06    | -5.98e-03 | -1.70e-02 | 5.02e-03 | .369     | 3.61e-05 | 6.26e-03 |
| Volume_HATA_L                | -1.37    | -7.55e-03 | -1.84e-02 | 3.26e-03 | .220     | 5.81e-05 | 8.05e-03 |
| Volume_HATA_R                | -0.26    | -1.48e-03 | -1.25e-02 | 9.51e-03 | .891     | 2.22e-06 | 1.55e-03 |
| Volume_hippocampal_fissure_L | 0.27     | 1.53e-03  | -9.63e-03 | 1.27e-02 | .887     | 2.36e-06 | 1.58e-03 |
| Volume_hippocampal_fissure_R | 0.07     | 3.79e-04  | -1.06e-02 | 1.14e-02 | 1.00     | 1.45e-07 | 3.98e-04 |
| Volume_Hippocampal_tail_L    | -1.12    | -6.29e-03 | -1.73e-02 | 4.71e-03 | .337     | 3.98e-05 | 6.59e-03 |
| Volume_Hippocampal_tail_R    | -0.40    | -2.25e-03 | -1.34e-02 | 8.86e-03 | .777     | 5.10e-06 | 2.34e-03 |
| Volume_L_Sg_L                | -0.85    | -4.83e-03 | -1.59e-02 | 6.29e-03 | .507     | 2.35e-05 | 5.01e-03 |
| Volume_L_Sg_R                | -1.29    | -7.17e-03 | -1.80e-02 | 3.69e-03 | .220     | 5.22e-05 | 7.61e-03 |
| Volume_LD_L                  | -0.39    | -2.24e-03 | -1.36e-02 | 9.15e-03 | .862     | 5.05e-06 | 2.27e-03 |
| Volume_LD_R                  | 0.62     | 3.60e-03  | -7.77e-03 | 1.50e-02 | .802     | 1.30e-05 | 3.65e-03 |
| Volume_LGN_L                 | -1.64    | -8.98e-03 | -1.97e-02 | 1.77e-03 | .152     | 8.25e-05 | 9.63e-03 |
| Volume_LGN_R                 | -0.73    | -3.90e-03 | -1.44e-02 | 6.62e-03 | .601     | 1.56e-05 | 4.27e-03 |
| Volume_LP_L                  | 0.72     | 4.19e-03  | -7.21e-03 | 1.56e-02 | .530     | 1.76e-05 | 4.24e-03 |

Table S21

*ET PRS Associations with SUBCORTICAL VOLUME*

| Tract                                   | <i>t</i>     | $\beta$          | CI_low           | CI_up            | <i>p</i>        | Eta2            | Cohens_f        |
|-----------------------------------------|--------------|------------------|------------------|------------------|-----------------|-----------------|-----------------|
| Volume_LP_R                             | 0.78         | 4.53e-03         | -6.85e-03        | 1.59e-02         | .490            | 2.06e-05        | 4.59e-03        |
| Volume_MDI_L                            | -1.07        | -6.03e-03        | -1.70e-02        | 5.00e-03         | .365            | 3.66e-05        | 6.30e-03        |
| Volume_MDI_R                            | -1.39        | -7.96e-03        | -1.92e-02        | 3.30e-03         | .187            | 6.36e-05        | 8.15e-03        |
| Volume_MDm_L                            | -0.10        | -5.21e-04        | -1.08e-02        | 9.79e-03         | 1.00            | 2.82e-07        | 5.82e-04        |
| Volume_MDm_R                            | -0.33        | -1.77e-03        | -1.21e-02        | 8.60e-03         | .831            | 3.22e-06        | 1.96e-03        |
| <b>Volume_Medulla_whole_brain</b>       | <b>-5.13</b> | <b>-2.98e-02</b> | <b>-4.13e-02</b> | <b>-1.84e-02</b> | <b>&lt;.001</b> | <b>8.90e-04</b> | <b>3.02e-02</b> |
| Volume_MGN_L                            | -0.81        | -4.58e-03        | -1.57e-02        | 6.55e-03         | .539            | 2.12e-05        | 4.75e-03        |
| Volume_MGN_R                            | -0.88        | -5.00e-03        | -1.61e-02        | 6.13e-03         | .426            | 2.52e-05        | 5.17e-03        |
| <b>Volume_Midbrain_whole_brain</b>      | <b>-3.67</b> | <b>-2.15e-02</b> | <b>-3.30e-02</b> | <b>-1.00e-02</b> | <b>&lt;.001</b> | <b>4.62e-04</b> | <b>2.16e-02</b> |
| Volume_molecular_Layer_HP_body_L        | -1.35        | -7.48e-03        | -1.84e-02        | 3.41e-03         | .229            | 5.66e-05        | 7.92e-03        |
| Volume_molecular_Layer_hP_Body_R        | -0.68        | -3.78e-03        | -1.47e-02        | 7.16e-03         | .641            | 1.44e-05        | 3.98e-03        |
| <b>Volume_molecular_Layer_HP_head_L</b> | <b>-2.55</b> | <b>-1.40e-02</b> | <b>-2.48e-02</b> | <b>-3.25e-03</b> | <b>.014</b>     | <b>1.98e-04</b> | <b>1.50e-02</b> |
| Volume_molecular_Layer_hP_head_R        | -1.08        | -5.88e-03        | -1.65e-02        | 4.76e-03         | .358            | 3.50e-05        | 6.37e-03        |
| Volume_MVRe_L                           | -0.56        | -3.10e-03        | -1.39e-02        | 7.72e-03         | .646            | 9.73e-06        | 3.30e-03        |
| Volume_MVRe_R                           | -0.26        | -1.42e-03        | -1.21e-02        | 9.28e-03         | .895            | 2.04e-06        | 1.53e-03        |
| Volume_parasubiculum_L                  | -1.62        | -9.51e-03        | -2.10e-02        | 1.97e-03         | .188            | 9.04e-05        | 9.55e-03        |
| Volume_parasubiculum_R                  | 0.56         | 3.28e-03         | -8.15e-03        | 1.47e-02         | .860            | 1.08e-05        | 3.31e-03        |
| Volume_Pc_L                             | 0.97         | 5.37e-03         | -5.44e-03        | 1.62e-02         | .557            | 2.94e-05        | 5.73e-03        |
| Volume_Pc_R                             | 0.95         | 5.25e-03         | -5.58e-03        | 1.61e-02         | .513            | 2.80e-05        | 5.59e-03        |
| Volume_Pf_L                             | 0.08         | 4.98e-04         | -1.10e-02        | 1.20e-02         | 1.00            | 2.48e-07        | 4.99e-04        |
| Volume_Pf_R                             | 0.07         | 4.37e-04         | -1.11e-02        | 1.19e-02         | 1.00            | 1.91e-07        | 4.38e-04        |
| <b>Volume_Pons_whole_brain</b>          | <b>-3.01</b> | <b>-1.76e-02</b> | <b>-2.92e-02</b> | <b>-6.14e-03</b> | <b>.008</b>     | <b>3.11e-04</b> | <b>1.77e-02</b> |
| Volume_presubiculum_Body_L              | -1.37        | -7.51e-03        | -1.83e-02        | 3.25e-03         | .257            | 5.72e-05        | 8.04e-03        |
| Volume_presubiculum_Body_R              | -1.52        | -8.33e-03        | -1.90e-02        | 2.38e-03         | .229            | 7.01e-05        | 8.96e-03        |

**Table S21*****ET PRS Associations with SUBCORTICAL VOLUME***

| Tract                      | <i>t</i> | $\beta$   | CI_low    | CI_up    | <i>p</i> | Eta2     | Cohens_f |
|----------------------------|----------|-----------|-----------|----------|----------|----------|----------|
| Volume_presubiculum_head_L | -1.27    | -7.06e-03 | -1.80e-02 | 3.85e-03 | .307     | 5.02e-05 | 7.46e-03 |
| Volume_presubiculum_head_R | -0.21    | -1.18e-03 | -1.20e-02 | 9.67e-03 | .997     | 1.40e-06 | 1.25e-03 |
| Volume_Pt_L                | -1.24    | -7.16e-03 | -1.85e-02 | 4.17e-03 | .323     | 5.14e-05 | 7.28e-03 |
| Volume_Pt_R                | -1.70    | -9.91e-03 | -2.13e-02 | 1.51e-03 | .115     | 9.88e-05 | 1.00e-02 |
| Volume_PuA_L               | 1.65     | 9.55e-03  | -1.79e-03 | 2.09e-02 | .116     | 9.16e-05 | 9.71e-03 |
| Volume_PuA_R               | 0.35     | 2.03e-03  | -9.37e-03 | 1.34e-02 | .818     | 4.12e-06 | 2.05e-03 |
| Volume_PuI_L               | 0.20     | 1.14e-03  | -1.02e-02 | 1.25e-02 | .950     | 1.30e-06 | 1.16e-03 |
| Volume_PuI_R               | -0.61    | -3.58e-03 | -1.50e-02 | 7.84e-03 | .606     | 1.29e-05 | 3.61e-03 |
| Volume_PuL_L               | 0.39     | 2.30e-03  | -9.14e-03 | 1.37e-02 | .780     | 5.30e-06 | 2.32e-03 |
| Volume_PuL_R               | -0.75    | -4.30e-03 | -1.56e-02 | 6.96e-03 | .511     | 1.89e-05 | 4.40e-03 |
| Volume_PuM_L               | 0.85     | 4.89e-03  | -6.42e-03 | 1.62e-02 | .595     | 2.40e-05 | 4.98e-03 |
| Volume_PuM_R               | 0.10     | 5.96e-04  | -1.07e-02 | 1.18e-02 | 1.00     | 3.56e-07 | 6.10e-04 |
| Volume_SCP_whole_brain     | -0.53    | -3.11e-03 | -1.46e-02 | 8.36e-03 | .814     | 9.66e-06 | 3.12e-03 |
| Volume_subiculum_Body_L    | 0.69     | 3.79e-03  | -7.05e-03 | 1.46e-02 | .555     | 1.45e-05 | 4.03e-03 |
| Volume_subiculum_Body_R    | 0.82     | 4.57e-03  | -6.34e-03 | 1.55e-02 | .463     | 2.10e-05 | 4.83e-03 |
| Volume_subiculum_head_L    | -1.78    | -9.86e-03 | -2.07e-02 | 9.70e-04 | .112     | 9.83e-05 | 1.05e-02 |
| Volume_subiculum_head_R    | -0.16    | -8.71e-04 | -1.17e-02 | 9.95e-03 | .984     | 7.68e-07 | 9.28e-04 |
| Volume_VA_L                | -0.02    | -1.44e-04 | -1.16e-02 | 1.13e-02 | 1.00     | 2.09e-08 | 1.45e-04 |
| Volume_VA_R                | -0.31    | -1.81e-03 | -1.33e-02 | 9.67e-03 | .852     | 3.29e-06 | 1.82e-03 |
| Volume_VAmc_L              | 0.67     | 3.83e-03  | -7.44e-03 | 1.51e-02 | .569     | 1.47e-05 | 3.91e-03 |
| Volume_VAmc_R              | 0.62     | 3.51e-03  | -7.66e-03 | 1.47e-02 | .606     | 1.24e-05 | 3.62e-03 |
| Volume_VLa_L               | 1.28     | 7.48e-03  | -3.96e-03 | 1.89e-02 | .300     | 5.61e-05 | 7.54e-03 |
| Volume_VLa_R               | 0.83     | 4.83e-03  | -6.61e-03 | 1.63e-02 | .459     | 2.34e-05 | 4.86e-03 |
| Volume_VLp_L               | 1.44     | 8.38e-03  | -3.00e-03 | 1.98e-02 | .191     | 7.05e-05 | 8.49e-03 |

**Table S21*****ET PRS Associations with SUBCORTICAL VOLUME***

| Tract                                     | <i>t</i>     | $\beta$          | CI_low           | CI_up            | <i>p</i>    | Eta2            | Cohens_f        |
|-------------------------------------------|--------------|------------------|------------------|------------------|-------------|-----------------|-----------------|
| Volume_VLp_R                              | 1.12         | 6.51e-03         | -4.85e-03        | 1.79e-02         | .336        | 4.26e-05        | 6.60e-03        |
| Volume_VM_L                               | -0.07        | -4.21e-04        | -1.19e-02        | 1.11e-02         | 1.00        | 1.77e-07        | 4.23e-04        |
| Volume_VM_R                               | -0.24        | -1.43e-03        | -1.29e-02        | 1.00e-02         | .954        | 2.05e-06        | 1.44e-03        |
| Volume_VPL_L                              | -0.48        | -2.83e-03        | -1.43e-02        | 8.65e-03         | .708        | 7.98e-06        | 2.84e-03        |
| Volume_VPL_R                              | -0.67        | -3.92e-03        | -1.54e-02        | 7.55e-03         | .566        | 1.54e-05        | 3.94e-03        |
| Volume_Whole_amygdala_L                   | -0.52        | -2.90e-03        | -1.38e-02        | 7.98e-03         | .676        | 8.50e-06        | 3.07e-03        |
| <b>Volume_Whole_Brainstem_whole_brain</b> | <b>-3.75</b> | <b>-2.20e-02</b> | <b>-3.35e-02</b> | <b>-1.05e-02</b> | <b>.001</b> | <b>4.83e-04</b> | <b>2.20e-02</b> |
| Volume_Whole_hippocampal_Body_L           | -0.81        | -4.27e-03        | -1.45e-02        | 6.02e-03         | .535        | 1.85e-05        | 4.78e-03        |
| Volume_Whole_hippocampal_Body_R           | -0.32        | -1.71e-03        | -1.21e-02        | 8.70e-03         | .841        | 2.97e-06        | 1.89e-03        |
| <b>Volume_Whole_hippocampal_head_L</b>    | <b>-2.14</b> | <b>-1.15e-02</b> | <b>-2.21e-02</b> | <b>-9.79e-04</b> | <b>.044</b> | <b>1.35e-04</b> | <b>1.26e-02</b> |
| Volume_Whole_hippocampal_head_R           | -0.98        | -5.30e-03        | -1.59e-02        | 5.26e-03         | .488        | 2.85e-05        | 5.79e-03        |
| Volume_Whole_hippocampus_L                | -1.68        | -8.89e-03        | -1.92e-02        | 1.45e-03         | .138        | 8.04e-05        | 9.91e-03        |
| Volume_Whole_hippocampus_R                | -0.73        | -3.88e-03        | -1.43e-02        | 6.54e-03         | .658        | 1.53e-05        | 4.29e-03        |
| Volume_Whole_thalamus_L                   | 0.35         | 2.00e-03         | -9.15e-03        | 1.31e-02         | .816        | 4.03e-06        | 2.07e-03        |
| Volume_Whole_thalamus_R                   | -0.04        | -2.50e-04        | -1.14e-02        | 1.09e-02         | 1.00        | 6.28e-08        | 2.58e-04        |

*Note*\* *p* < .05, \*\* *p* < .01, \*\*\* *p* < .001, 95% CI(B)**Table S22*****ET PRS Associations with SUBCORTICAL VOLUME \_ EXTENDED SEGMENTATION 1***

| Tract                     | <i>t</i>     | $\beta$          | CI_low           | CI_up            | <i>p</i>    | Eta2            | Cohens_f        |
|---------------------------|--------------|------------------|------------------|------------------|-------------|-----------------|-----------------|
| <b>VGM_Amygdala__left</b> | <b>-2.34</b> | <b>-1.36e-02</b> | <b>-2.50e-02</b> | <b>-2.22e-03</b> | <b>.025</b> | <b>1.93e-04</b> | <b>1.48e-02</b> |
| VGM_Amygdala__right       | -1.72        | -9.86e-03        | -2.11e-02        | 1.38e-03         | .096        | 1.02e-04        | 1.09e-02        |
| VGM_Angular_Gyrus__left   | 1.21         | 7.58e-03         | -4.67e-03        | 1.98e-02         | .338        | 5.77e-05        | 7.68e-03        |
| VGM_Angular_Gyrus__right  | 0.90         | 5.58e-03         | -6.62e-03        | 1.78e-02         | .793        | 3.13e-05        | 5.68e-03        |

Table S22

*ET PRS Associations with SUBCORTICAL VOLUME \_ EXTENDED SEGMENTATION 1*

| Tract                                          | <i>t</i>     | $\beta$          | CI_low           | CI_up            | <i>p</i>    | Eta2            | Cohens_f        |
|------------------------------------------------|--------------|------------------|------------------|------------------|-------------|-----------------|-----------------|
| <b>VGM_BrainStem</b>                           | <b>-2.75</b> | <b>-1.62e-02</b> | <b>-2.77e-02</b> | <b>-4.65e-03</b> | <b>.008</b> | <b>2.64e-04</b> | <b>1.74e-02</b> |
| VGM_Caudate__left                              | 0.33         | 2.05e-03         | -1.00e-02        | 1.41e-02         | .831        | 4.21e-06        | 2.11e-03        |
| VGM_Caudate__right                             | 0.96         | 5.88e-03         | -6.11e-03        | 1.79e-02         | .409        | 3.48e-05        | 6.09e-03        |
| VGM_CentralOpercular_Cortex__left              | -1.16        | -6.81e-03        | -1.84e-02        | 4.74e-03         | .279        | 4.77e-05        | 7.32e-03        |
| VGM_CentralOpercular_Cortex__right             | -1.16        | -6.88e-03        | -1.85e-02        | 4.70e-03         | .275        | 4.89e-05        | 7.37e-03        |
| VGM_Cingulate_Gyrus__anterior_division__left   | 0.91         | 5.77e-03         | -6.61e-03        | 1.82e-02         | .406        | 3.33e-05        | 5.79e-03        |
| VGM_Cingulate_Gyrus__anterior_division__right  | 0.84         | 5.28e-03         | -7.10e-03        | 1.77e-02         | .518        | 2.79e-05        | 5.29e-03        |
| VGM_Cingulate_Gyrus__posterior_division__left  | -0.02        | -1.33e-04        | -1.24e-02        | 1.21e-02         | 1.00        | 1.77e-08        | 1.34e-04        |
| VGM_Cingulate_Gyrus__posterior_division__right | 1.07         | 6.76e-03         | -5.59e-03        | 1.91e-02         | .364        | 4.57e-05        | 6.79e-03        |
| <b>VGM_CrusI_Cerebellum__left</b>              | <b>-2.39</b> | <b>-1.40e-02</b> | <b>-2.55e-02</b> | <b>-2.49e-03</b> | <b>.022</b> | <b>2.01e-04</b> | <b>1.51e-02</b> |
| VGM_CrusI_Cerebellum__right                    | -1.74        | -1.03e-02        | -2.18e-02        | 1.28e-03         | .105        | 1.08e-04        | 1.10e-02        |
| VGM_CrusI_Cerebellum__vermis                   | -0.87        | -5.50e-03        | -1.78e-02        | 6.83e-03         | .459        | 3.02e-05        | 5.53e-03        |
| <b>VGM_CrusII_Cerebellum__left</b>             | <b>-3.47</b> | <b>-2.07e-02</b> | <b>-3.25e-02</b> | <b>-9.02e-03</b> | <b>.001</b> | <b>4.42e-04</b> | <b>2.20e-02</b> |
| <b>VGM_CrusII_Cerebellum__right</b>            | <b>-2.89</b> | <b>-1.73e-02</b> | <b>-2.90e-02</b> | <b>-5.56e-03</b> | <b>.005</b> | <b>3.07e-04</b> | <b>1.83e-02</b> |
| VGM_CrusII_Cerebellum__vermis                  | -1.44        | -8.78e-03        | -2.07e-02        | 3.16e-03         | .224        | 7.78e-05        | 9.12e-03        |
| VGM_Cuneal_Cortex__left                        | -1.13        | -6.94e-03        | -1.90e-02        | 5.09e-03         | .337        | 4.89e-05        | 7.16e-03        |
| VGM_Cuneal_Cortex__right                       | -0.71        | -4.39e-03        | -1.64e-02        | 7.66e-03         | .535        | 1.95e-05        | 4.52e-03        |
| VGM_Frontal_Pole__left                         | -0.13        | -7.75e-04        | -1.22e-02        | 1.06e-02         | 1.00        | 6.20e-07        | 8.43e-04        |
| VGM_Frontal_Pole__right                        | -0.63        | -3.71e-03        | -1.52e-02        | 7.81e-03         | .594        | 1.41e-05        | 4.00e-03        |
| VGM_FrontalMedial_Cortex__left                 | 0.10         | 6.35e-04         | -1.13e-02        | 1.26e-02         | 1.00        | 4.12e-07        | 6.58e-04        |
| VGM_FrontalMedial_Cortex__right                | 0.72         | 4.44e-03         | -7.57e-03        | 1.64e-02         | .597        | 2.00e-05        | 4.59e-03        |
| VGM_FrontalOperculum_Cortex__left              | -1.22        | -7.35e-03        | -1.91e-02        | 4.43e-03         | .398        | 5.52e-05        | 7.75e-03        |
| VGM_FrontalOperculum_Cortex__right             | -1.28        | -7.79e-03        | -1.97e-02        | 4.13e-03         | .300        | 6.16e-05        | 8.11e-03        |
| VGM_FrontalOrbital_Cortex__left                | -0.80        | -4.71e-03        | -1.63e-02        | 6.90e-03         | .480        | 2.28e-05        | 5.04e-03        |

**Table S22**

***ET PRS Associations with SUBCORTICAL VOLUME \_ EXTENDED SEGMENTATION 1***

| Tract                                                      | <i>t</i>     | $\beta$          | CI_low           | CI_up            | <i>p</i>    | Eta2            | Cohens_f        |
|------------------------------------------------------------|--------------|------------------|------------------|------------------|-------------|-----------------|-----------------|
| VGM_FrontalOrbital_Cortex__right                           | 0.09         | 5.53e-04         | -1.12e-02        | 1.23e-02         | 1.00        | 3.13e-07        | 5.86e-04        |
| VGM_Heschls_Gyrus__left                                    | 0.03         | 2.01e-04         | -1.14e-02        | 1.18e-02         | 1.00        | 4.12e-08        | 2.14e-04        |
| VGM_Heschls_Gyrus__right                                   | -1.45        | -8.51e-03        | -2.00e-02        | 2.96e-03         | .188        | 7.49e-05        | 9.21e-03        |
| <b>VGM_Hippocampus__left</b>                               | <b>-2.26</b> | <b>-1.35e-02</b> | <b>-2.52e-02</b> | <b>-1.79e-03</b> | <b>.031</b> | <b>1.85e-04</b> | <b>1.43e-02</b> |
| VGM_Hippocampus__right                                     | -0.18        | -1.10e-03        | -1.28e-02        | 1.06e-02         | .961        | 1.22e-06        | 1.16e-03        |
| VGM_I2IV_Cerebellum__left                                  | -0.66        | -4.07e-03        | -1.61e-02        | 7.94e-03         | .652        | 1.66e-05        | 4.20e-03        |
| VGM_I2IV_Cerebellum__right                                 | -0.61        | -3.71e-03        | -1.56e-02        | 8.21e-03         | .696        | 1.39e-05        | 3.87e-03        |
| VGM_Inferior_Frontal_Gyrus__pars_opercularis__<br>left     | -0.15        | -9.07e-04        | -1.29e-02        | 1.10e-02         | 1.00        | 8.35e-07        | 9.42e-04        |
| VGM_Inferior_Frontal_Gyrus__pars_opercularis__<br>right    | -0.29        | -1.75e-03        | -1.38e-02        | 1.03e-02         | .943        | 3.11e-06        | 1.81e-03        |
| VGM_Inferior_Frontal_Gyrus__pars_triangularis__<br>left    | 1.30         | 8.04e-03         | -4.05e-03        | 2.01e-02         | .247        | 6.52e-05        | 8.26e-03        |
| VGM_Inferior_Frontal_Gyrus__pars_triangularis__<br>right   | -0.27        | -1.69e-03        | -1.38e-02        | 1.04e-02         | 1.00        | 2.88e-06        | 1.73e-03        |
| VGM_Inferior_Temporal_Gyrus__anterior_divisio<br>n__left   | -1.04        | -6.51e-03        | -1.88e-02        | 5.74e-03         | .383        | 4.26e-05        | 6.59e-03        |
| VGM_Inferior_Temporal_Gyrus__anterior_divisio<br>n__right  | 0.35         | 2.22e-03         | -1.01e-02        | 1.45e-02         | 1.00        | 4.98e-06        | 2.24e-03        |
| VGM_Inferior_Temporal_Gyrus__posterior_divisio<br>n__left  | 0.28         | 1.77e-03         | -1.05e-02        | 1.41e-02         | .875        | 3.13e-06        | 1.78e-03        |
| VGM_Inferior_Temporal_Gyrus__posterior_divisio<br>n__right | -0.02        | -1.38e-04        | -1.24e-02        | 1.21e-02         | 1.00        | 1.91e-08        | 1.39e-04        |

Table S22

*ET PRS Associations with SUBCORTICAL VOLUME \_ EXTENDED SEGMENTATION 1*

| Tract                                                            | <i>t</i>     | $\beta$          | CI_low           | CI_up            | <i>p</i>         | Eta2            | Cohens_f        |
|------------------------------------------------------------------|--------------|------------------|------------------|------------------|------------------|-----------------|-----------------|
| <b>VGM_Inferior_Temporal_Gyrus__temporoocci<br/>pital__left</b>  | <b>3.04</b>  | <b>1.92e-02</b>  | <b>6.85e-03</b>  | <b>3.16e-02</b>  | <b>.003</b>      | <b>3.69e-04</b> | <b>1.93e-02</b> |
| <b>VGM_Inferior_Temporal_Gyrus__temporoocci<br/>pital__right</b> | <b>2.57</b>  | <b>1.61e-02</b>  | <b>3.82e-03</b>  | <b>2.85e-02</b>  | <b>.018</b>      | <b>2.61e-04</b> | <b>1.63e-02</b> |
| <b>VGM_Insular_Cortex__left</b>                                  | <b>-2.16</b> | <b>-1.31e-02</b> | <b>-2.50e-02</b> | <b>-1.23e-03</b> | <b>.041</b>      | <b>1.76e-04</b> | <b>1.37e-02</b> |
| VGM_Insular_Cortex__right                                        | -1.84        | -1.13e-02        | -2.33e-02        | 7.29e-04         | .074             | 1.30e-04        | 1.17e-02        |
| VGM_Intracalcarine_Cortex__left                                  | -2.04        | -1.27e-02        | -2.50e-02        | -4.75e-04        | .094             | 1.63e-04        | 1.29e-02        |
| VGM_Intracalcarine_Cortex__right                                 | -1.88        | -1.17e-02        | -2.39e-02        | 5.20e-04         | .091             | 1.38e-04        | 1.19e-02        |
| <b>VGM_IX_Cerebellum__left</b>                                   | <b>-3.67</b> | <b>-2.16e-02</b> | <b>-3.32e-02</b> | <b>-1.01e-02</b> | <b>&lt; .001</b> | <b>4.81e-04</b> | <b>2.32e-02</b> |
| <b>VGM_IX_Cerebellum__right</b>                                  | <b>-3.95</b> | <b>-2.31e-02</b> | <b>-3.46e-02</b> | <b>-1.17e-02</b> | <b>&lt; .001</b> | <b>5.54e-04</b> | <b>2.50e-02</b> |
| <b>VGM_IX_Cerebellum__vermis</b>                                 | <b>-3.13</b> | <b>-1.89e-02</b> | <b>-3.08e-02</b> | <b>-7.06e-03</b> | <b>.003</b>      | <b>3.64e-04</b> | <b>1.98e-02</b> |
| VGM_LateralOccipital_Cortex__inferiordivision__<br>left          | 1.51         | 9.39e-03         | -2.77e-03        | 2.16e-02         | .195             | 8.89e-05        | 9.59e-03        |
| VGM_LateralOccipital_Cortex__inferiordivision__<br>right         | 1.68         | 1.04e-02         | -1.75e-03        | 2.26e-02         | .168             | 1.10e-04        | 1.06e-02        |
| VGM_LateralOccipital_Cortex__superiordivision__<br>_left         | 0.02         | 1.02e-04         | -1.14e-02        | 1.16e-02         | 1.00             | 1.06e-08        | 1.10e-04        |
| VGM_LateralOccipital_Cortex__superiordivision__<br>_right        | 0.11         | 6.66e-04         | -1.10e-02        | 1.24e-02         | 1.00             | 4.51e-07        | 7.06e-04        |
| VGM_Lingual_Gyrus__left                                          | -0.25        | -1.54e-03        | -1.37e-02        | 1.06e-02         | .904             | 2.38e-06        | 1.57e-03        |
| VGM_Lingual_Gyrus__right                                         | -1.71        | -1.06e-02        | -2.27e-02        | 1.58e-03         | .132             | 1.12e-04        | 1.08e-02        |
| VGM_Middle_Frontal_Gyrus__left                                   | -1.41        | -8.76e-03        | -2.09e-02        | 3.38e-03         | .274             | 7.72e-05        | 8.96e-03        |
| VGM_Middle_Frontal_Gyrus__right                                  | -0.55        | -3.39e-03        | -1.56e-02        | 8.78e-03         | .752             | 1.16e-05        | 3.46e-03        |



**Table S22**

***ET PRS Associations with SUBCORTICAL VOLUME \_ EXTENDED SEGMENTATION 1***

| Tract                                                | <i>t</i> | $\beta$   | CI_low    | CI_up    | <i>p</i> | Eta2     | Cohens_f |
|------------------------------------------------------|----------|-----------|-----------|----------|----------|----------|----------|
| VGM_Middle_Temporal_Gyrus__anterior_division__left   | -0.19    | -1.21e-03 | -1.34e-02 | 1.10e-02 | .951     | 1.47e-06 | 1.23e-03 |
| VGM_Middle_Temporal_Gyrus__anterior_division__right  | 1.72     | 1.07e-02  | -1.52e-03 | 2.30e-02 | .111     | 1.16e-04 | 1.09e-02 |
| VGM_Middle_Temporal_Gyrus__posterior_division__left  | -0.81    | -4.92e-03 | -1.69e-02 | 7.05e-03 | .541     | 2.47e-05 | 5.10e-03 |
| VGM_Middle_Temporal_Gyrus__posterior_division__right | 1.45     | 8.71e-03  | -3.07e-03 | 2.05e-02 | .205     | 7.74e-05 | 9.18e-03 |
| VGM_Middle_Temporal_Gyrus__temporooccipital__left    | 2.17     | 1.36e-02  | 1.29e-03  | 2.59e-02 | .055     | 1.85e-04 | 1.37e-02 |
| VGM_Middle_Temporal_Gyrus__temporooccipital__right   | 0.76     | 4.77e-03  | -7.55e-03 | 1.71e-02 | .776     | 2.28e-05 | 4.81e-03 |
| VGM_OccipitalFusiform_Gyrus__left                    | -0.51    | -3.10e-03 | -1.50e-02 | 8.82e-03 | .686     | 9.77e-06 | 3.23e-03 |
| VGM_OccipitalFusiform_Gyrus__right                   | -1.00    | -6.07e-03 | -1.79e-02 | 5.78e-03 | .354     | 3.75e-05 | 6.36e-03 |
| VGM_OccipitalPole__left                              | -0.02    | -9.82e-05 | -1.20e-02 | 1.18e-02 | 1.00     | 9.71e-09 | 1.03e-04 |
| VGM_OccipitalPole__right                             | -0.79    | -4.84e-03 | -1.69e-02 | 7.22e-03 | .555     | 2.33e-05 | 4.98e-03 |
| VGM_Pallidum__left                                   | -1.21    | -7.53e-03 | -1.97e-02 | 4.63e-03 | .289     | 5.69e-05 | 7.68e-03 |
| VGM_Pallidum__right                                  | -0.75    | -4.57e-03 | -1.66e-02 | 7.46e-03 | .587     | 2.10e-05 | 4.72e-03 |
| VGM_Paracingulate_Gyrus__left                        | 0.45     | 2.68e-03  | -8.91e-03 | 1.43e-02 | .872     | 7.37e-06 | 2.87e-03 |
| VGM_Paracingulate_Gyrus__right                       | -0.65    | -3.77e-03 | -1.52e-02 | 7.63e-03 | .665     | 1.46e-05 | 4.10e-03 |
| VGM_Parahippocampal_Gyrus__anterior_division__left   | -0.51    | -3.18e-03 | -1.53e-02 | 8.94e-03 | .683     | 1.02e-05 | 3.26e-03 |
| VGM_Parahippocampal_Gyrus__anterior_division__right  | 0.25     | 1.58e-03  | -1.06e-02 | 1.37e-02 | .899     | 2.50e-06 | 1.61e-03 |

**Table S22**

***ET PRS Associations with SUBCORTICAL VOLUME \_ EXTENDED SEGMENTATION 1***

| Tract                                                   | <i>t</i>     | $\beta$          | CI_low           | CI_up            | <i>p</i>    | Eta2            | Cohens_f        |
|---------------------------------------------------------|--------------|------------------|------------------|------------------|-------------|-----------------|-----------------|
| VGM_Parahippocampal_Gyrus__posterior_divisio<br>n_left  | -1.33        | -8.15e-03        | -2.01e-02        | 3.82e-03         | .273        | 6.71e-05        | 8.45e-03        |
| VGM_Parahippocampal_Gyrus__posterior_divisio<br>n_right | 0.92         | 5.59e-03         | -6.36e-03        | 1.75e-02         | .462        | 3.15e-05        | 5.81e-03        |
| VGM_ParietalOperculum_Cortex__left                      | 0.20         | 1.26e-03         | -1.09e-02        | 1.34e-02         | 1.00        | 1.59e-06        | 1.28e-03        |
| VGM_ParietalOperculum_Cortex__right                     | -0.98        | -6.10e-03        | -1.82e-02        | 6.05e-03         | .418        | 3.74e-05        | 6.23e-03        |
| VGM_Planum_Temporale__left                              | 0.16         | 9.90e-04         | -1.10e-02        | 1.30e-02         | 1.00        | 9.82e-07        | 1.02e-03        |
| VGM_Planum_Temporale__right                             | -0.92        | -5.60e-03        | -1.76e-02        | 6.38e-03         | .462        | 3.16e-05        | 5.80e-03        |
| VGM_PlanumPolare__left                                  | -0.93        | -5.36e-03        | -1.67e-02        | 5.96e-03         | .398        | 2.99e-05        | 5.88e-03        |
| VGM_PlanumPolare__right                                 | -1.39        | -7.94e-03        | -1.91e-02        | 3.25e-03         | .185        | 6.60e-05        | 8.81e-03        |
| VGM_Postcentral_Gyrus__left                             | -1.02        | -5.82e-03        | -1.70e-02        | 5.34e-03         | .345        | 3.55e-05        | 6.47e-03        |
| VGM_Postcentral_Gyrus__right                            | -1.19        | -6.73e-03        | -1.78e-02        | 4.39e-03         | .265        | 4.74e-05        | 7.52e-03        |
| VGM_Precentral_Gyrus__left                              | 0.02         | 1.03e-04         | -1.12e-02        | 1.14e-02         | 1.00        | 1.12e-08        | 1.12e-04        |
| VGM_Precentral_Gyrus__right                             | -0.85        | -4.98e-03        | -1.64e-02        | 6.45e-03         | .505        | 2.60e-05        | 5.41e-03        |
| VGM_Precuneous_Cortex__left                             | -1.55        | -9.38e-03        | -2.12e-02        | 2.45e-03         | .180        | 8.96e-05        | 9.84e-03        |
| VGM_Precuneous_Cortex__right                            | -1.41        | -8.43e-03        | -2.01e-02        | 3.26e-03         | .203        | 7.27e-05        | 8.95e-03        |
| <b>VGM_Putamen__left</b>                                | <b>-2.68</b> | <b>-1.69e-02</b> | <b>-2.92e-02</b> | <b>-4.53e-03</b> | <b>.011</b> | <b>2.85e-04</b> | <b>1.70e-02</b> |
| VGM_Putamen__right                                      | -1.74        | -1.09e-02        | -2.31e-02        | 1.35e-03         | .105        | 1.20e-04        | 1.10e-02        |
| VGM_Subcallosal_Cortex__left                            | -2.00        | -1.24e-02        | -2.45e-02        | -2.38e-04        | .069        | 1.54e-04        | 1.27e-02        |
| VGM_Subcallosal_Cortex__right                           | -2.32        | -1.46e-02        | -2.70e-02        | -2.25e-03        | .062        | 2.14e-04        | 1.47e-02        |
| VGM_Superior_Frontal_Gyrus__left                        | 0.56         | 3.42e-03         | -8.61e-03        | 1.55e-02         | .649        | 1.19e-05        | 3.53e-03        |
| VGM_Superior_Frontal_Gyrus__right                       | 0.55         | 3.40e-03         | -8.75e-03        | 1.55e-02         | .686        | 1.16e-05        | 3.47e-03        |
| VGM_Superior_ParietalLobule__left                       | -0.90        | -5.53e-03        | -1.75e-02        | 6.46e-03         | .521        | 3.10e-05        | 5.72e-03        |
| VGM_Superior_ParietalLobule__right                      | -1.82        | -1.12e-02        | -2.33e-02        | 8.55e-04         | .154        | 1.28e-04        | 1.15e-02        |

**Table S22*****ET PRS Associations with SUBCORTICAL VOLUME \_ EXTENDED SEGMENTATION 1***

| Tract                                                  | <i>t</i> | $\beta$   | CI_low    | CI_up    | <i>p</i> | Eta2     | Cohens_f |
|--------------------------------------------------------|----------|-----------|-----------|----------|----------|----------|----------|
| VGM_Superior_Temporal_Gyrus__anterior_division__left   | 0.62     | 3.86e-03  | -8.29e-03 | 1.60e-02 | .600     | 1.50e-05 | 3.95e-03 |
| VGM_Superior_Temporal_Gyrus__anterior_division__right  | 0.41     | 2.53e-03  | -9.59e-03 | 1.46e-02 | .768     | 6.46e-06 | 2.59e-03 |
| VGM_Superior_Temporal_Gyrus__posterior_division__left  | -1.90    | -1.16e-02 | -2.37e-02 | 3.97e-04 | .067     | 1.37e-04 | 1.20e-02 |
| VGM_Superior_Temporal_Gyrus__posterior_division__right | -0.88    | -5.31e-03 | -1.72e-02 | 6.56e-03 | .440     | 2.86e-05 | 5.55e-03 |
| VGM_SupplementaryMotor_Cortex__left                    | -0.78    | -4.86e-03 | -1.70e-02 | 7.28e-03 | .649     | 2.39e-05 | 4.97e-03 |
| VGM_SupplementaryMotor_Cortex__right                   | -1.20    | -7.42e-03 | -1.95e-02 | 4.67e-03 | .344     | 5.56e-05 | 7.62e-03 |

*Note*\*  $p < .05$ , \*\*  $p < .01$ , \*\*\*  $p < .001$ , 95% CI(B)**Table S23*****ET PRS Associations with SUBCORTICAL VOLUME \_ EXTENDED SEGMENTATION 2***

| Tract                                             | <i>t</i> | $\beta$   | CI_low    | CI_up    | <i>p</i> | Eta2     | Cohens_f |
|---------------------------------------------------|----------|-----------|-----------|----------|----------|----------|----------|
| VGM_Supracalcarine_Cortex__left                   | -0.89    | -5.59e-03 | -1.79e-02 | 6.75e-03 | .421     | 3.13e-05 | 5.62e-03 |
| VGM_Supracalcarine_Cortex__right                  | -1.01    | -6.33e-03 | -1.86e-02 | 5.92e-03 | .560     | 4.04e-05 | 6.41e-03 |
| VGM_Supramarginal_Gyrus__anterior_division__left  | 0.45     | 2.80e-03  | -9.46e-03 | 1.51e-02 | .736     | 7.89e-06 | 2.83e-03 |
| VGM_Supramarginal_Gyrus__anterior_division__right | -1.05    | -6.52e-03 | -1.86e-02 | 5.60e-03 | .375     | 4.29e-05 | 6.68e-03 |
| VGM_Supramarginal_Gyrus__posterior_division__left | -0.26    | -1.64e-03 | -1.39e-02 | 1.06e-02 | .893     | 2.70e-06 | 1.66e-03 |

Table S23

*ET PRS Associations with SUBCORTICAL VOLUME \_ EXTENDED SEGMENTATION 2*

| Tract                                                         | <i>t</i>     | $\beta$          | CI_low           | CI_up            | <i>p</i>         | Eta2            | Cohens_f        |
|---------------------------------------------------------------|--------------|------------------|------------------|------------------|------------------|-----------------|-----------------|
| <b>VGM_Supramarginal_Gyrus__posterior_divisio<br/>n_right</b> | <b>-3.17</b> | <b>-1.95e-02</b> | <b>-3.16e-02</b> | <b>-7.42e-03</b> | <b>.005</b>      | <b>3.84e-04</b> | <b>2.00e-02</b> |
| VGM_Temporal_Pole__left                                       | 0.72         | 4.39e-03         | -7.60e-03        | 1.64e-02         | .540             | 1.96e-05        | 4.55e-03        |
| VGM_Temporal_Pole__right                                      | 1.33         | 8.11e-03         | -3.87e-03        | 2.01e-02         | .238             | 6.71e-05        | 8.40e-03        |
| VGM_TemporalFusiform_Cortex__anterior_divisio<br>n_left       | -1.36        | -8.34e-03        | -2.03e-02        | 3.64e-03         | .222             | 7.10e-05        | 8.64e-03        |
| VGM_TemporalFusiform_Cortex__anterior_divisio<br>n_right      | 0.07         | 4.18e-04         | -1.17e-02        | 1.25e-02         | 1.00             | 1.78e-07        | 4.28e-04        |
| VGM_TemporalFusiform_Cortex__posterior_divisi<br>on_left      | -1.11        | -6.74e-03        | -1.87e-02        | 5.19e-03         | .345             | 4.61e-05        | 7.01e-03        |
| VGM_TemporalFusiform_Cortex__posterior_divisi<br>on_right     | -0.98        | -6.00e-03        | -1.80e-02        | 6.01e-03         | .369             | 3.65e-05        | 6.20e-03        |
| VGM_TemporalOccipitalFusiform_Cortex__left                    | -0.68        | -4.22e-03        | -1.65e-02        | 8.02e-03         | .562             | 1.79e-05        | 4.28e-03        |
| VGM_TemporalOccipitalFusiform_Cortex__right                   | -0.85        | -5.25e-03        | -1.74e-02        | 6.93e-03         | .512             | 2.77e-05        | 5.35e-03        |
| VGM_Thalamus__left                                            | -0.14        | -8.38e-04        | -1.28e-02        | 1.11e-02         | 1.00             | 7.05e-07        | 8.68e-04        |
| VGM_Thalamus__right                                           | -0.62        | -3.80e-03        | -1.59e-02        | 8.28e-03         | .605             | 1.45e-05        | 3.90e-03        |
| VGM_V_Cerebellum__left                                        | -1.93        | -1.18e-02        | -2.37e-02        | 1.66e-04         | .080             | 1.40e-04        | 1.22e-02        |
| VGM_V_Cerebellum__right                                       | -1.85        | -1.13e-02        | -2.32e-02        | 6.61e-04         | .082             | 1.28e-04        | 1.17e-02        |
| VGM_VentralStriatum__left                                     | -0.34        | -1.96e-03        | -1.33e-02        | 9.32e-03         | .825             | 4.00e-06        | 2.16e-03        |
| VGM_VentralStriatum__right                                    | -1.38        | -8.13e-03        | -1.96e-02        | 3.39e-03         | .188             | 6.81e-05        | 8.75e-03        |
| <b>VGM_VI_Cerebellum__left</b>                                | <b>-4.59</b> | <b>-2.66e-02</b> | <b>-3.80e-02</b> | <b>-1.52e-02</b> | <b>&lt; .001</b> | <b>7.28e-04</b> | <b>2.91e-02</b> |
| <b>VGM_VI_Cerebellum__right</b>                               | <b>-3.37</b> | <b>-1.97e-02</b> | <b>-3.12e-02</b> | <b>-8.24e-03</b> | <b>.001</b>      | <b>3.98e-04</b> | <b>2.13e-02</b> |
| <b>VGM_VI_Cerebellum__vermis</b>                              | <b>-2.93</b> | <b>-1.75e-02</b> | <b>-2.91e-02</b> | <b>-5.80e-03</b> | <b>.005</b>      | <b>3.10e-04</b> | <b>1.86e-02</b> |
| <b>VGM_VIIb_Cerebellum__left</b>                              | <b>-2.70</b> | <b>-1.60e-02</b> | <b>-2.77e-02</b> | <b>-4.40e-03</b> | <b>.008</b>      | <b>2.66e-04</b> | <b>1.71e-02</b> |

Table S23

*ET PRS Associations with SUBCORTICAL VOLUME \_ EXTENDED SEGMENTATION 2*

| Tract                                | <i>t</i>     | $\beta$          | CI_low           | CI_up            | <i>p</i>         | Eta2            | Cohens_f        |
|--------------------------------------|--------------|------------------|------------------|------------------|------------------|-----------------|-----------------|
| VGM_VIIb_Cerebellum__right           | <b>-2.71</b> | <b>-1.62e-02</b> | -2.80e-02        | -4.51e-03        | .007             | 2.73e-04        | 1.72e-02        |
| VGM_VIIb_Cerebellum__vermis          | <b>-2.43</b> | <b>-1.45e-02</b> | -2.61e-02        | -2.82e-03        | .022             | 2.13e-04        | 1.54e-02        |
| VGM_VIIIa_Cerebellum__left           | <b>-2.60</b> | <b>-1.50e-02</b> | -2.62e-02        | -3.68e-03        | .011             | 2.35e-04        | 1.65e-02        |
| VGM_VIIIa_Cerebellum__right          | <b>-2.23</b> | <b>-1.27e-02</b> | -2.39e-02        | -1.53e-03        | .029             | 1.71e-04        | 1.41e-02        |
| VGM_VIIIa_Cerebellum__vermis         | -2.04        | -1.20e-02        | -2.34e-02        | -4.75e-04        | .053             | 1.47e-04        | 1.29e-02        |
| VGM_VIIIb_Cerebellum__left           | <b>-3.30</b> | <b>-1.96e-02</b> | -3.12e-02        | -7.93e-03        | .001             | 3.95e-04        | 2.09e-02        |
| VGM_VIIIb_Cerebellum__right          | <b>-3.24</b> | <b>-1.88e-02</b> | -3.02e-02        | -7.41e-03        | .001             | 3.70e-04        | 2.05e-02        |
| VGM_VIIIb_Cerebellum__vermis         | <b>-2.62</b> | <b>-1.58e-02</b> | -2.75e-02        | -3.97e-03        | .013             | 2.53e-04        | 1.66e-02        |
| VGM_X_Cerebellum__left               | -0.38        | -2.32e-03        | -1.43e-02        | 9.62e-03         | .791             | 5.44e-06        | 2.41e-03        |
| VGM_X_Cerebellum__right              | -0.68        | -4.08e-03        | -1.59e-02        | 7.72e-03         | .640             | 1.69e-05        | 4.29e-03        |
| VGM_X_Cerebellum__vermis             | <b>-4.34</b> | <b>-2.52e-02</b> | <b>-3.66e-02</b> | <b>-1.38e-02</b> | <b>&lt; .001</b> | <b>6.46e-04</b> | <b>2.75e-02</b> |
| Vol_3rdVentricle__whole_brain        | -0.31        | -1.66e-03        | -1.20e-02        | 8.73e-03         | .849             | 2.92e-06        | 1.98e-03        |
| Vol_4thVentricle__whole_brain        | -0.20        | -1.25e-03        | -1.34e-02        | 1.09e-02         | 1.00             | 1.58e-06        | 1.28e-03        |
| Vol_5thVentricle__whole_brain        | -0.07        | -4.19e-04        | -1.28e-02        | 1.20e-02         | 1.00             | 1.76e-07        | 4.19e-04        |
| Vol_accumbens__left                  | -1.05        | -6.12e-03        | -1.75e-02        | 5.30e-03         | .375             | 3.88e-05        | 6.66e-03        |
| Vol_accumbens__right                 | 0.47         | 2.68e-03         | -8.52e-03        | 1.39e-02         | .719             | 7.45e-06        | 2.97e-03        |
| Vol_Accumbens_area__left_hemisphere  | 0.46         | 2.59e-03         | -8.41e-03        | 1.36e-02         | .726             | 6.97e-06        | 2.92e-03        |
| Vol_Accumbens_area__right_hemisphere | -0.14        | -8.27e-04        | -1.23e-02        | 1.07e-02         | .999             | 7.05e-07        | 8.94e-04        |
| Vol_amygdala__left                   | -1.21        | -7.66e-03        | -2.00e-02        | 4.72e-03         | .405             | 5.88e-05        | 7.68e-03        |
| Vol_Amygdala__left_hemisphere        | -0.89        | -5.26e-03        | -1.68e-02        | 6.27e-03         | .477             | 2.81e-05        | 5.66e-03        |
| Vol_amygdala__right                  | -0.19        | -1.17e-03        | -1.36e-02        | 1.12e-02         | .990             | 1.37e-06        | 1.17e-03        |
| Vol_Amygdala__right_hemisphere       | -1.00        | -6.10e-03        | -1.80e-02        | 5.84e-03         | .570             | 3.74e-05        | 6.34e-03        |
| Vol_BrainSeg__whole_brain            | -1.84        | -1.09e-02        | -2.26e-02        | 7.38e-04         | .085             | 1.21e-04        | 1.16e-02        |
| Vol_BrainSegNotVent__whole_brain     | -1.93        | -1.10e-02        | -2.22e-02        | 1.69e-04         | .069             | 1.24e-04        | 1.22e-02        |

**Table S23**

***ET PRS Associations with SUBCORTICAL VOLUME \_ EXTENDED SEGMENTATION 2***

| Tract                                                    | <i>t</i>     | $\beta$          | CI_low           | CI_up            | <i>p</i>    | Eta2            | Cohens_f        |
|----------------------------------------------------------|--------------|------------------|------------------|------------------|-------------|-----------------|-----------------|
| Vol_BrainSegNotVentSurf__whole_brain                     | -1.94        | -1.10e-02        | -2.22e-02        | 1.18e-04         | .067        | 1.25e-04        | 1.23e-02        |
| <b>Vol_BrainStem__whole_brain</b>                        | <b>-2.73</b> | <b>-1.73e-02</b> | <b>-2.96e-02</b> | <b>-4.89e-03</b> | <b>.011</b> | <b>2.98e-04</b> | <b>1.73e-02</b> |
| Vol_caudate__left                                        | 0.82         | 5.09e-03         | -7.10e-03        | 1.73e-02         | .531        | 2.61e-05        | 5.18e-03        |
| Vol_Caudate__left_hemisphere                             | 1.20         | 7.47e-03         | -4.76e-03        | 1.97e-02         | .297        | 5.58e-05        | 7.58e-03        |
| Vol_caudate__right                                       | 1.49         | 9.33e-03         | -2.91e-03        | 2.16e-02         | .174        | 8.73e-05        | 9.46e-03        |
| Vol_Caudate__right_hemisphere                            | 1.58         | 9.88e-03         | -2.37e-03        | 2.21e-02         | .171        | 9.77e-05        | 1.00e-02        |
| Vol_CCAnterior__whole_brain                              | 1.44         | 8.83e-03         | -3.19e-03        | 2.09e-02         | .193        | 7.89e-05        | 9.12e-03        |
| Vol_CCCentral__whole_brain                               | -0.48        | -2.86e-03        | -1.45e-02        | 8.74e-03         | .776        | 8.35e-06        | 3.06e-03        |
| Vol_CCMidAnterior__whole_brain                           | 0.26         | 1.52e-03         | -1.01e-02        | 1.31e-02         | 1.00        | 2.37e-06        | 1.63e-03        |
| Vol_CCMidPosterior__whole_brain                          | -1.15        | -6.87e-03        | -1.86e-02        | 4.89e-03         | .378        | 4.82e-05        | 7.25e-03        |
| Vol_CCPosterior__whole_brain                             | 1.15         | 7.00e-03         | -4.96e-03        | 1.90e-02         | .323        | 4.92e-05        | 7.27e-03        |
| <b>Vol_Cerebellum_Cortex__left_hemisphere</b>            | <b>-3.11</b> | <b>-1.95e-02</b> | <b>-3.18e-02</b> | <b>-7.19e-03</b> | <b>.003</b> | <b>3.80e-04</b> | <b>1.97e-02</b> |
| <b>Vol_Cerebellum_Cortex__right_hemisphere</b>           | <b>-2.53</b> | <b>-1.59e-02</b> | <b>-2.82e-02</b> | <b>-3.61e-03</b> | <b>.020</b> | <b>2.53e-04</b> | <b>1.61e-02</b> |
| <b>Vol_Cerebellum_WhiteMatter__right_hemispher<br/>e</b> | <b>-3.66</b> | <b>-2.20e-02</b> | <b>-3.38e-02</b> | <b>-1.03e-02</b> | <b>.001</b> | <b>4.94e-04</b> | <b>2.32e-02</b> |
| <b>Vol_CerebellumWM__left_hemisphere</b>                 | <b>-3.17</b> | <b>-1.88e-02</b> | <b>-3.04e-02</b> | <b>-7.17e-03</b> | <b>.002</b> | <b>3.62e-04</b> | <b>2.01e-02</b> |
| Vol_CerebralWhiteMatter__left_hemisphere                 | -0.29        | -1.73e-03        | -1.34e-02        | 9.96e-03         | .868        | 3.03e-06        | 1.84e-03        |
| Vol_CerebralWhiteMatter__right_hemisphere                | -0.31        | -1.85e-03        | -1.36e-02        | 9.87e-03         | .852        | 3.45e-06        | 1.96e-03        |
| Vol_choroid_plexus__left_hemisphere                      | -0.30        | -1.62e-03        | -1.23e-02        | 9.02e-03         | 1.00        | 2.80e-06        | 1.89e-03        |
| Vol_choroid_plexus__right_hemisphere                     | 0.12         | 6.56e-04         | -9.80e-03        | 1.11e-02         | 1.00        | 4.58e-07        | 7.79e-04        |
| Vol_Cortex__left_hemisphere                              | -1.26        | -7.42e-03        | -1.90e-02        | 4.14e-03         | .247        | 5.63e-05        | 7.97e-03        |
| Vol_Cortex__right_hemisphere                             | -1.63        | -9.62e-03        | -2.12e-02        | 1.98e-03         | .211        | 9.43e-05        | 1.03e-02        |
| Vol_CSF__whole_brain                                     | 1.47         | 8.83e-03         | -2.92e-03        | 2.06e-02         | .211        | 8.04e-05        | 9.32e-03        |
| Vol_hippocampus__left                                    | 0.05         | 3.18e-04         | -1.14e-02        | 1.20e-02         | 1.00        | 1.03e-07        | 3.38e-04        |

**Table S23*****ET PRS Associations with SUBCORTICAL VOLUME \_ EXTENDED SEGMENTATION 2***

| Tract                                   | <i>t</i> | $\beta$   | CI_low    | CI_up    | <i>p</i> | Eta2     | Cohens_f |
|-----------------------------------------|----------|-----------|-----------|----------|----------|----------|----------|
| Vol_Hippocampus__left_hemisphere        | -1.40    | -8.14e-03 | -1.95e-02 | 3.24e-03 | .242     | 6.77e-05 | 8.88e-03 |
| Vol_hippocampus__right                  | 0.64     | 3.82e-03  | -7.92e-03 | 1.56e-02 | .674     | 1.48e-05 | 4.04e-03 |
| Vol_Hippocampus__right_hemisphere       | 0.06     | 3.26e-04  | -1.10e-02 | 1.17e-02 | 1.00     | 1.09e-07 | 3.57e-04 |
| Vol_Inf_Lat_Vent__right_hemisphere      | -1.10    | -6.22e-03 | -1.73e-02 | 4.90e-03 | .351     | 4.00e-05 | 6.95e-03 |
| Vol_InfLatVent__left_hemisphere         | -0.25    | -1.36e-03 | -1.21e-02 | 9.42e-03 | .906     | 1.93e-06 | 1.56e-03 |
| Vol_Lateral_Ventricle__right_hemisphere | 0.46     | 2.54e-03  | -8.34e-03 | 1.34e-02 | .729     | 6.72e-06 | 2.89e-03 |
| Vol_LateralVentricle__left_hemisphere   | 1.22     | 6.83e-03  | -4.13e-03 | 1.78e-02 | .285     | 4.87e-05 | 7.74e-03 |
| Vol_nonWMhypointensities__whole_brain   | 0.23     | 1.47e-03  | -1.09e-02 | 1.39e-02 | .919     | 2.16e-06 | 1.47e-03 |
| Vol_OpticChiasm__whole_brain            | -0.64    | -3.81e-03 | -1.55e-02 | 7.91e-03 | .590     | 1.49e-05 | 4.03e-03 |
| Vol_pallidum__left                      | 0.16     | 9.91e-04  | -1.13e-02 | 1.32e-02 | .983     | 9.84e-07 | 1.00e-03 |
| Vol_Pallidum__left_hemisphere           | -0.52    | -3.26e-03 | -1.55e-02 | 8.97e-03 | .677     | 1.06e-05 | 3.31e-03 |
| Vol_pallidum__right                     | -0.29    | -1.82e-03 | -1.39e-02 | 1.03e-02 | .865     | 3.32e-06 | 1.86e-03 |
| Vol_Pallidum__right_hemisphere          | -0.21    | -1.32e-03 | -1.36e-02 | 1.09e-02 | .938     | 1.73e-06 | 1.33e-03 |
| Vol_putamen__left                       | -0.41    | -2.46e-03 | -1.42e-02 | 9.28e-03 | .767     | 6.15e-06 | 2.60e-03 |
| Vol_Putamen__left_hemisphere            | -0.59    | -3.63e-03 | -1.57e-02 | 8.45e-03 | .626     | 1.33e-05 | 3.73e-03 |
| Vol_putamen__right                      | 0.29     | 1.76e-03  | -1.01e-02 | 1.36e-02 | .868     | 3.13e-06 | 1.84e-03 |
| Vol_Putamen__right_hemisphere           | -0.45    | -2.81e-03 | -1.49e-02 | 9.30e-03 | .730     | 7.94e-06 | 2.88e-03 |
| Vol_SubCortGray__whole_brain            | -0.53    | -3.12e-03 | -1.47e-02 | 8.44e-03 | .767     | 9.92e-06 | 3.35e-03 |
| Vol_SupraTentorial__whole_brain         | -1.00    | -5.96e-03 | -1.76e-02 | 5.71e-03 | .407     | 3.59e-05 | 6.34e-03 |
| Vol_SupraTentorialNotVent__whole_brain  | -1.17    | -6.64e-03 | -1.78e-02 | 4.53e-03 | .313     | 4.53e-05 | 7.38e-03 |
| Vol_thalamus__left                      | -1.45    | -8.35e-03 | -1.97e-02 | 2.97e-03 | .191     | 7.19e-05 | 9.15e-03 |
| Vol_thalamus__right                     | -1.42    | -8.20e-03 | -1.95e-02 | 3.13e-03 | .201     | 6.92e-05 | 8.98e-03 |
| Vol_Thalamus_Proper__left_hemisphere    | 0.33     | 1.91e-03  | -9.50e-03 | 1.33e-02 | .955     | 3.75e-06 | 2.08e-03 |
| Vol_Thalamus_Proper__right_hemisphere   | 0.94     | 5.59e-03  | -6.07e-03 | 1.72e-02 | .521     | 3.17e-05 | 5.95e-03 |

**Table S23**

***ET PRS Associations with SUBCORTICAL VOLUME \_ EXTENDED SEGMENTATION 2***

| Tract                                         | <i>t</i>     | $\beta$          | CI_low    | CI_up     | <i>p</i> | Eta2     | Cohens_f |
|-----------------------------------------------|--------------|------------------|-----------|-----------|----------|----------|----------|
| <b>Vol_TotalGray__whole_brain</b>             | <b>-2.21</b> | <b>-1.29e-02</b> | -2.44e-02 | -1.46e-03 | .046     | 1.71e-04 | 1.40e-02 |
| <b>Vol_VentralDC__left_hemisphere</b>         | <b>-3.57</b> | <b>-2.18e-02</b> | -3.34e-02 | -9.86e-03 | < .001   | 5.28e-04 | 2.29e-02 |
| <b>Vol_VentralDC__right_hemisphere</b>        | <b>-3.38</b> | <b>-2.07e-02</b> | -3.26e-02 | -8.70e-03 | .001     | 4.75e-04 | 2.18e-02 |
| Vol_VentricleChoroid__whole_brain             | 0.83         | 4.56e-03         | -6.18e-03 | 1.53e-02  | .456     | 2.18e-05 | 5.27e-03 |
| Vol_vessel__left_hemisphere                   | -0.13        | -8.50e-04        | -1.32e-02 | 1.15e-02  | 1.00     | 7.23e-07 | 8.53e-04 |
| Vol_vessel__right_hemisphere                  | 0.41         | 2.56e-03         | -9.80e-03 | 1.49e-02  | .880     | 6.55e-06 | 2.57e-03 |
| Vol_Wmhypointensities__whole_brain            | 0.92         | 5.38e-03         | -6.03e-03 | 1.68e-02  | .457     | 2.97e-05 | 5.85e-03 |
| Volume_ratio_of_BrainSegVol2eTIV__whole_brain | -1.69        | -9.24e-03        | -2.00e-02 | 1.49e-03  | .103     | 8.61e-05 | 1.07e-02 |
| Volume_ratio_of_MaskVol2eTIV__whole_brain     | -0.81        | -4.45e-03        | -1.52e-02 | 6.30e-03  | .626     | 1.99e-05 | 5.14e-03 |

*Note*

\*  $p < .05$ , \*\*  $p < .01$ , \*\*\*  $p < .001$ , 95% CI(B)



**Table S24**

*Summary of ET patient samples, high genetic risk, and low genetic risk matched healthy control samples*

| <b>Cohort</b>                      | <b>Sample Size (N)</b> | <b>N Females (%)</b> | <b>N Males (%)</b> | <b>Stats.</b>            | <b>Sex</b> | <b>Age</b> | <b>Center</b> | <b>Adjusted PRS</b> |
|------------------------------------|------------------------|----------------------|--------------------|--------------------------|------------|------------|---------------|---------------------|
| Essential Tremor Patients          | 49                     | 22 (44.9%)           | 27 (55.1%)         | <i>Min.</i>              | 0          | 49         | 11025         | N/A                 |
|                                    |                        |                      |                    | <i>1<sup>st</sup> Q.</i> | 0          | 64         | 11025         | N/A                 |
|                                    |                        |                      |                    | <i>Median</i>            | 1          | 70         | 11025         | N/A                 |
|                                    |                        |                      |                    | <i>Mean</i>              | 0.551      | 67.67      | 11026         | N/A                 |
|                                    |                        |                      |                    | <i>3<sup>rd</sup> Q.</i> | 1          | 73         | 11027         | N/A                 |
|                                    |                        |                      |                    | <i>Max.</i>              | 1          | 81         | 11027         | N/A                 |
| Matched High Risk Healthy Controls | 49                     | 22 (44.9%)           | 27 (55.1%)         | <i>Min.</i>              | 0          | 49         | 11025         | 8.91E-08            |
|                                    |                        |                      |                    | <i>1<sup>st</sup> Q.</i> | 0          | 64         | 11025         | 9.25E-08            |
|                                    |                        |                      |                    | <i>Median</i>            | 1          | 70         | 11026         | 9.85E-08            |
|                                    |                        |                      |                    | <i>Mean</i>              | 0.551      | 67.59      | 11026         | 1.04E-07            |
|                                    |                        |                      |                    | <i>3<sup>rd</sup> Q.</i> | 1          | 73         | 11027         | 1.09E-07            |
|                                    |                        |                      |                    | <i>Max.</i>              | 1          | 80         | 11027         | 1.63E-07            |
| Matched Low Risk Healthy Controls  | 49                     | 22 (44.9%)           | 27 (55.1%)         | <i>Min.</i>              | 0          | 50         | 11025         | -1.86E-07           |
|                                    |                        |                      |                    | <i>1<sup>st</sup> Q.</i> | 0          | 64         | 11025         | -1.19E-07           |
|                                    |                        |                      |                    | <i>Median</i>            | 1          | 70         | 11025         | -1.07E-07           |
|                                    |                        |                      |                    | <i>Mean</i>              | 0.551      | 67.69      | 11026         | -1.10E-07           |
|                                    |                        |                      |                    | <i>3<sup>rd</sup> Q.</i> | 1          | 73         | 11027         | -9.73E-08           |
|                                    |                        |                      |                    | <i>Max.</i>              | 1          | 79         | 11027         | -9.03E-08           |

*\*No PRS for ET patients*

*\*\* Q. Quartiles*

NB. After exclusion criteria, the number of participants with MRI we have is 63 subjects (self\_report: 53 + ICD10: 10 = 63 subjects)

Out of these we have 49 subjects with complete subcortical volume segmentation (1 additional subject that did not have complete cerebellar subcortical volume was removed)

Table S25

*Cortical and subcortical volume associations in matched ET vs healthy control groups of low (LR PRS) and high (HR PRS) genetic risk*

| ET vs LR PRS           |        |         | ET vs HR PRS            |        |         |
|------------------------|--------|---------|-------------------------|--------|---------|
| ROI                    | pFDR   | tWelch  | ROI                     | pFDR   | tWelch  |
| Brainstem              | 0.0058 | -2.8196 | Pallidum_R              | 0.0403 | -2.0788 |
| Pallidum_L             | 0.0150 | -2.4780 | Putamen_L               | 0.0032 | -3.0264 |
| Thalamus_R             | 0.0326 | -2.1680 | Putamen_R               | 0.0495 | -1.9897 |
| Posterior_cingulate_L  | 0.0467 | -2.0169 | Hippocampus_L           | 0.0053 | -2.8568 |
| Posterior_cingulate_R  | 0.0270 | -2.2492 | Hippocampus_R           | 0.0073 | -2.7454 |
| Inferior_temporal_R    | 0.0350 | -2.1394 | Middle_temporal_L       | 0.0245 | -2.2851 |
| Medial_orbitofrontal_L | 0.0186 | 2.3946  | Superior_parietal_L     | 0.0281 | -2.2308 |
| Medial_orbitofrontal_R | 0.0102 | 2.6191  | Parahippocampal_L       | 0.0236 | -2.2999 |
| Pars_orbitalis_R       | 0.0131 | 2.5305  | Parahippocampal_R       | 0.0365 | -2.1222 |
| Lateral_occipital_L    | 0.0234 | 2.3030  | Medial_orbitofrontal_L  | 0.0094 | 2.6513  |
| Fusiform_L             | 0.0340 | -2.1542 | Medial_orbitofrontal_R  | 0.0108 | 2.6013  |
| Fusiform_R             | 0.0446 | 2.0353  | Fusiform_R              | 0.0292 | -2.2163 |
| V_Cerebellum_L         | 0.0261 | -2.2594 | VIIIa_Cerebellum_R      | 0.0357 | -2.1314 |
| VI_Cerebellum_L        | 0.0491 | -1.9938 | I2IV_Cerebellum_L       | 0.0114 | -2.5794 |
| VI_Cerebellum_R        | 0.0455 | -2.0270 | CrusI_Cerebellum_vermis | 0.0393 | -2.0927 |
| VI_Cerebellum_vermis   | 0.0079 | -2.7169 |                         |        |         |
| VIIIa_Cerebellum_L     | 0.0068 | -2.7660 |                         |        |         |
| VIIIa_Cerebellum_R     | 0.0203 | -2.3603 |                         |        |         |
| VIIIb_Cerebellum_L     | 0.0415 | -2.0668 |                         |        |         |
| IX_Cerebellum_L        | 0.0316 | -2.1814 |                         |        |         |
| IX_Cerebellum_R        | 0.0392 | -2.0911 |                         |        |         |
| X_Cerebellum_vermis    | 0.0356 | -2.1336 |                         |        |         |

**Table S26*****Significant transcriptomic associations from Transcriptomic Structural Equation Modeling (TSEM)***

| Gene              | Ensembl ID         | Locus    | Z_Estimate | Pval_Estimate |
|-------------------|--------------------|----------|------------|---------------|
| <i>FOXO3</i>      | ENSG00000118689.14 | 6q21     | -4.97065   | 6.67e-07      |
| <i>SLC44A5</i>    | ENSG00000137968.16 | 1p31.1   | -4.94424   | 7.64e-07      |
| <i>WASHC3</i>     | ENSG00000120860.10 | 12q23.2  | -4.89079   | 1.00e-06      |
| <i>ARL17A</i>     | ENSG00000185829.17 | 17q21.31 | -4.80594   | 1.54e-06      |
| <i>LRRC37A2</i>   | ENSG00000238083.7  | 17q21.31 | -4.77634   | 1.79e-06      |
| <i>FAM215B</i>    | ENSG00000232300.1  | 17q21.31 | -4.76735   | 1.87e-06      |
| <i>NA</i>         | ENSG00000266918.1  | 17q21.31 | -4.74021   | 2.13e-06      |
| <i>MAPK8IP1P1</i> | ENSG00000262500.1  | 17q21.31 | -4.73075   | 2.24e-06      |
| <i>SPPL2C</i>     | ENSG00000185294.6  | 17q21.31 | -4.70466   | 2.54e-06      |
| <i>NA</i>         | ENSG00000280022.1  | 17q21.32 | 4.702957   | 2.56e-06      |
| <i>NA</i>         | ENSG00000261575.2  | 17q21.33 | -4.70187   | 2.58e-06      |
| <i>NA</i>         | ENSG00000262539.1  | 17q21.34 | -4.70112   | 2.59e-06      |
| <i>KANSLI-ASI</i> | ENSG00000214401.4  | 17q21.31 | -4.70098   | 2.59e-06      |
| <i>DND1P1</i>     | ENSG00000264070.1  | 17q21.31 | -4.7009    | 2.59e-06      |
| <i>NA</i>         | ENSG00000236234.1  | 17q21.32 | 4.700666   | 2.59e-06      |
| <i>MAPK8IP1P2</i> | ENSG00000263503.1  | 17q21.31 | -4.69126   | 2.72e-06      |
| <i>MAPT-ITI</i>   | ENSG00000279685.2  | 17q21.31 | -4.68541   | 2.79e-06      |
| <i>PLEKHM1</i>    | ENSG00000225190.10 | 17q21.31 | 4.658154   | 3.19e-06      |
| <i>LRRC37A4P</i>  | ENSG00000214425.7  | 17q21.31 | 4.654885   | 3.24e-06      |
| <i>MAPT-ASI</i>   | ENSG00000264589.2  | 17q21.31 | 4.485421   | 7.28e-06      |

**Table S26.** All significant genes from transcriptome-wide structural equation modeling after Bonferroni correction (p-value: 8.23e-6). Associations between gene expression in the cerebellum and the common factor built from IDPs corresponding to identified ROIs associated to ET PRS are shown.
