# Supplementary material for: Brain imaging phenotypes associated with polygenic risk for Essential Tremor
Source: bioRxiv or medRxiv preprint supplement (doi:10.1101/2024.07.16.24310501), 2024-12-06
Supplement: Supplementary file [file media-3.pdf]

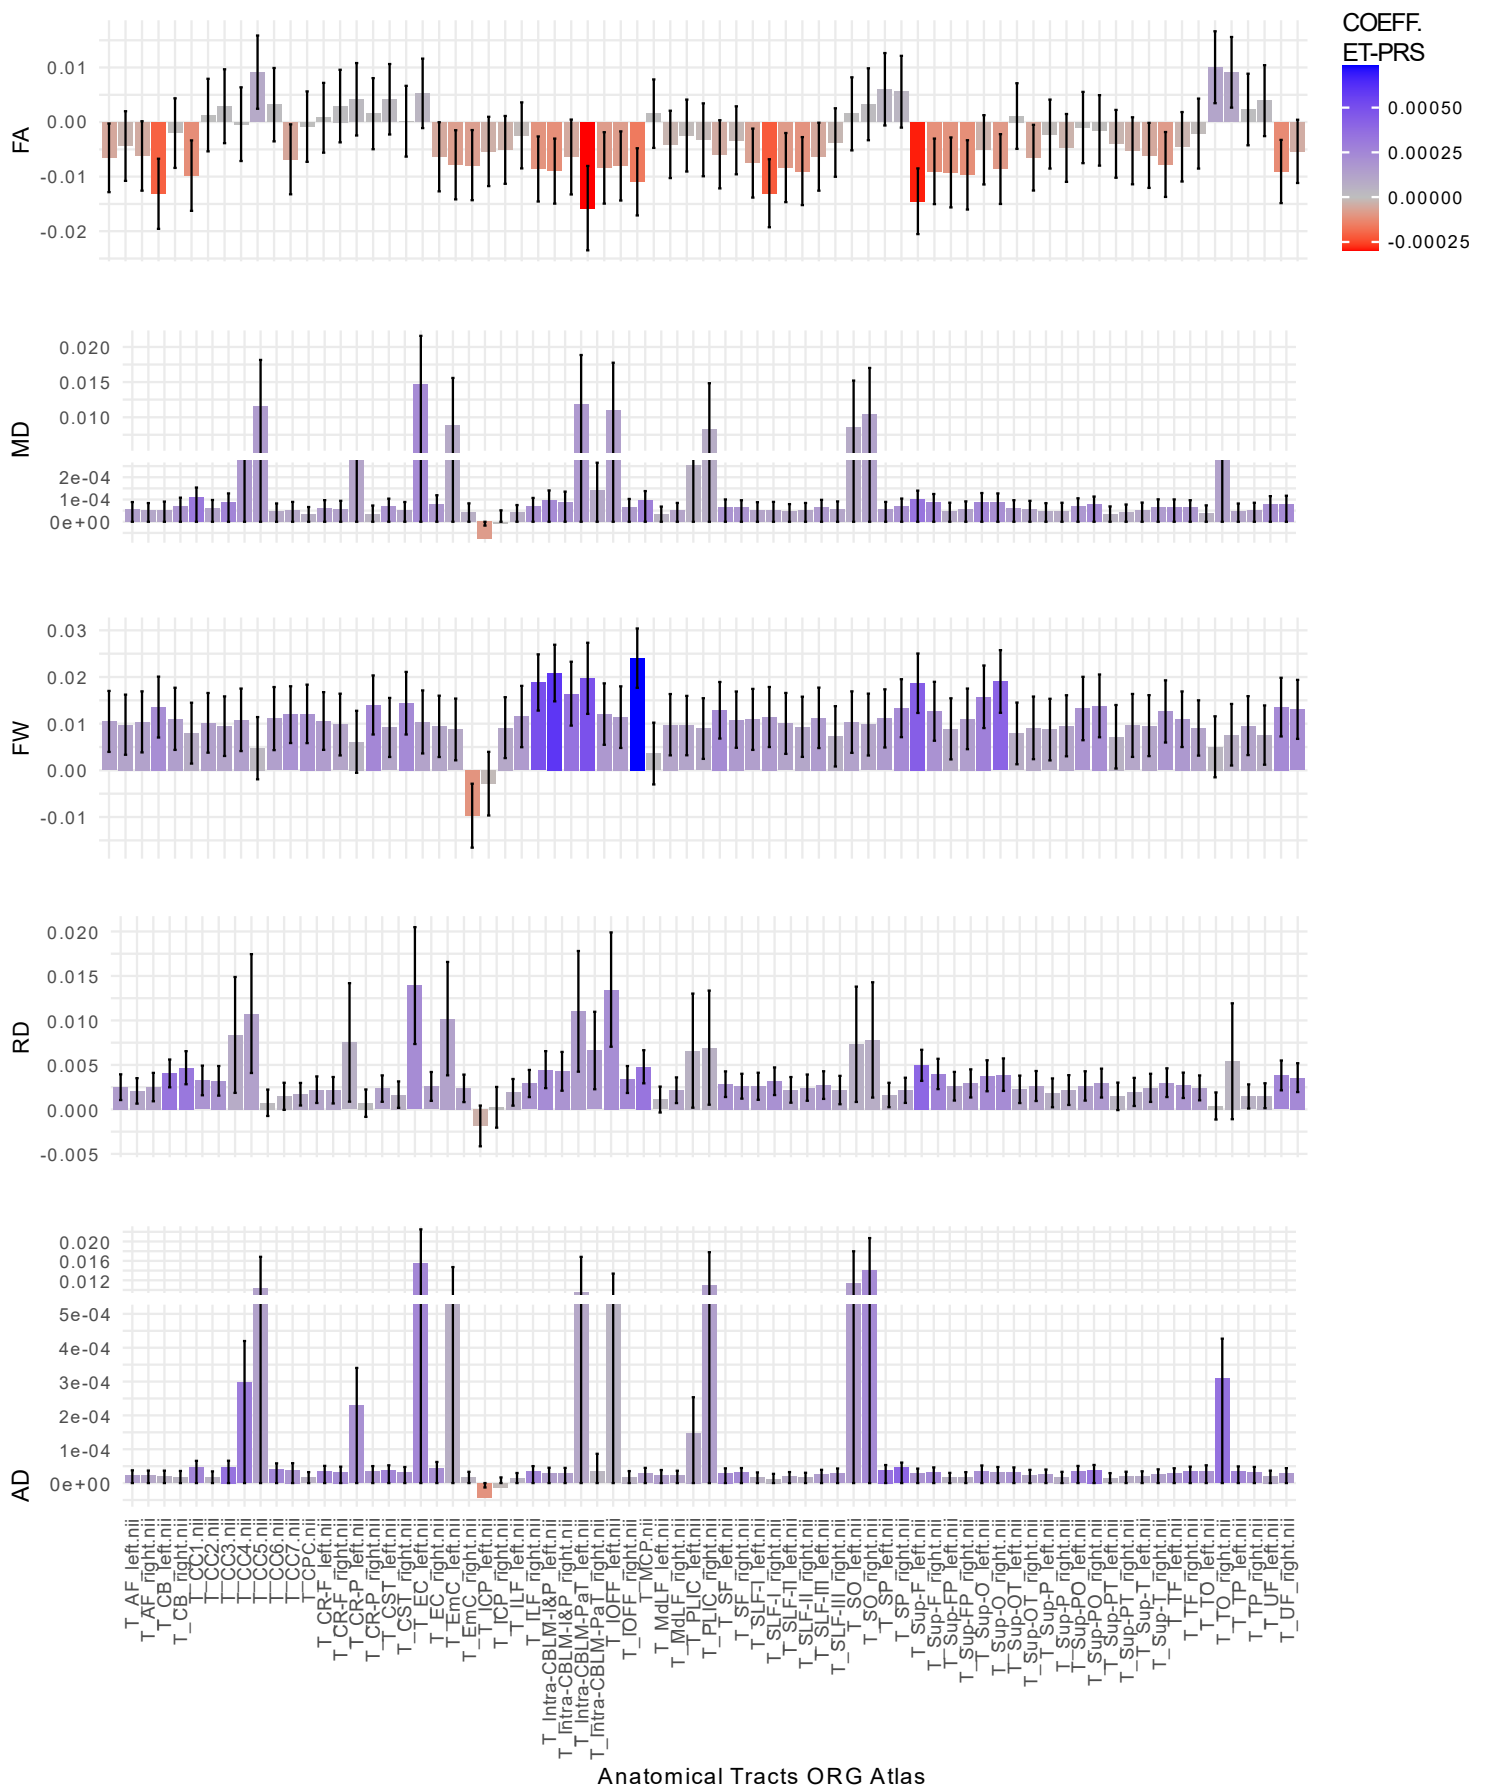

**Figure S1. Histograms ET PRS associations with white matter diffusion-weighted magnetic resonance imaging (ORG Atlas)**

Histograms representing the associations of ET polygenic risk scores (PRS) (coefficients) with white matter microstructure measures in 73 anatomical tracts (ORG atlas). Measures of fractional anisotropy (FA), mean diffusivity (MD), free water (FW), radial diffusivity (RD), and axial diffusivity (AD).

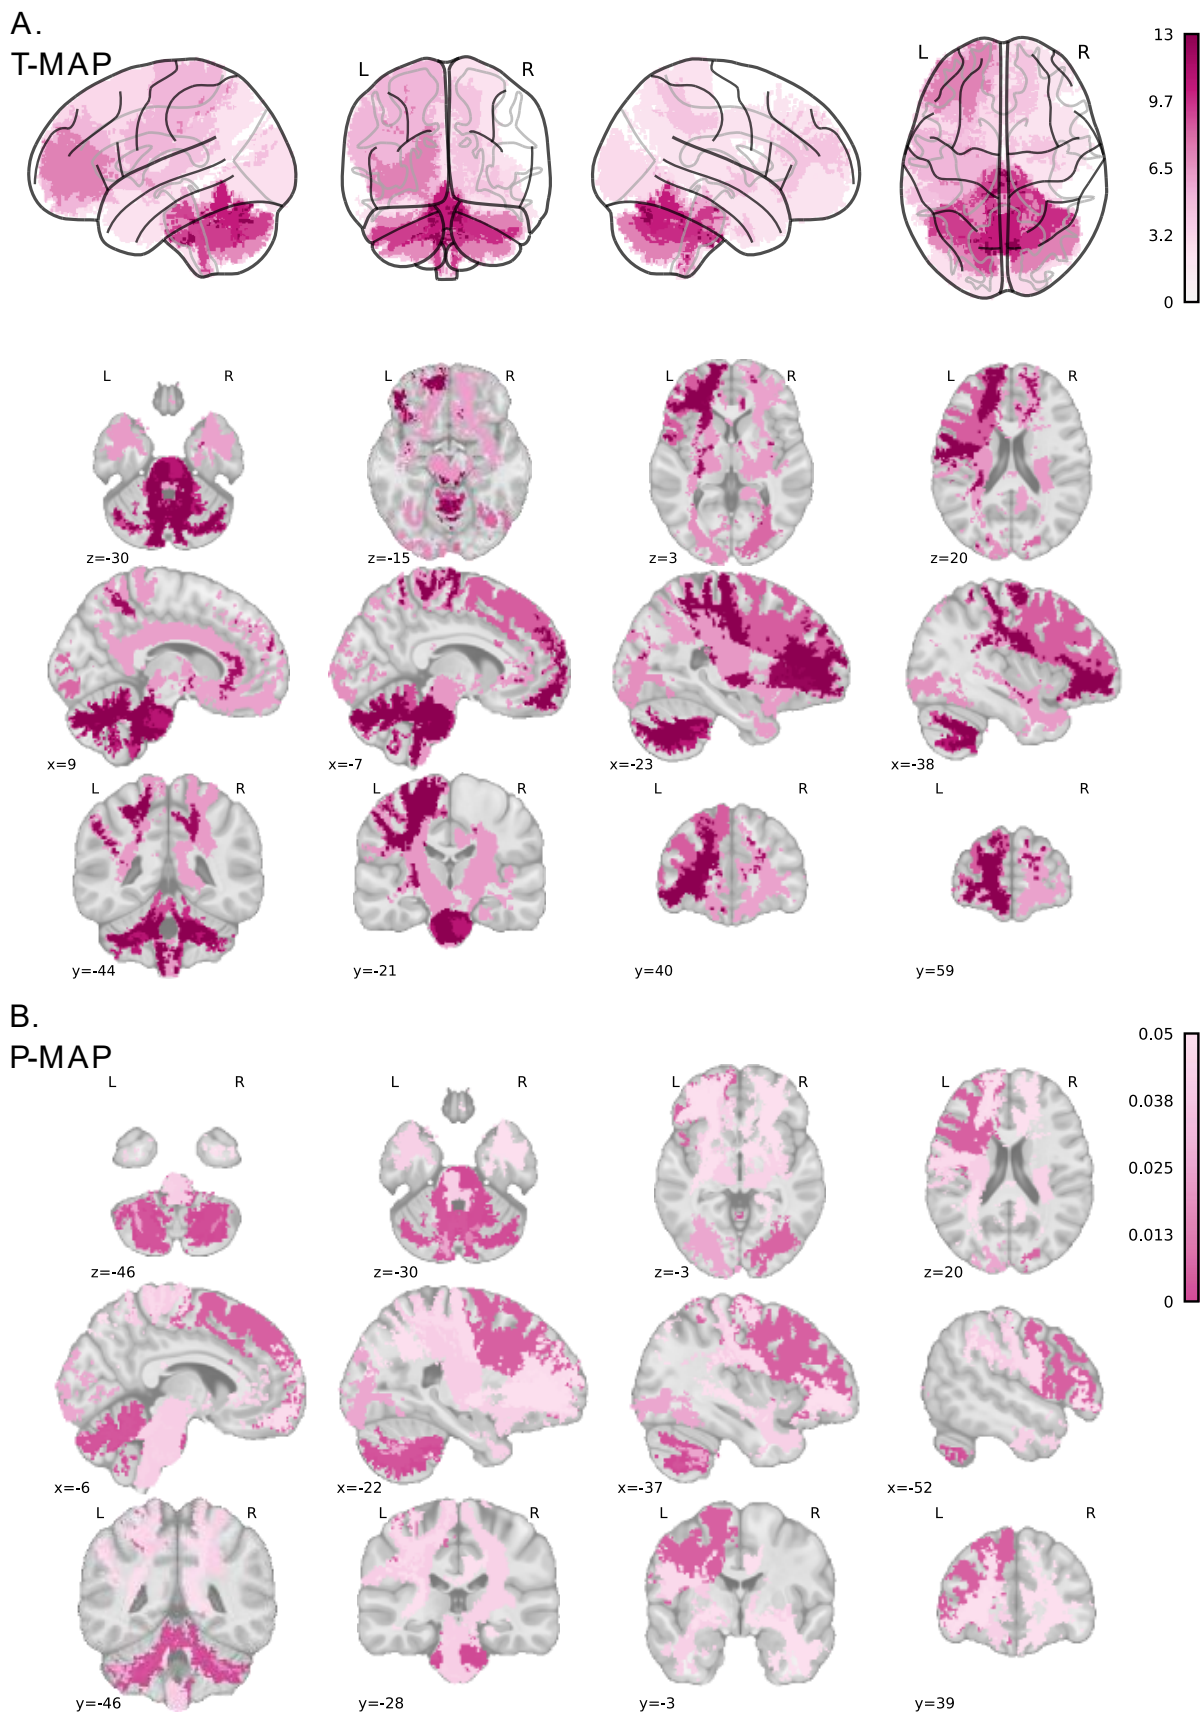

**Figure S2. White matter diffusion-weighted magnetic resonance imaging of free water in ORG Atlas**

Free water (FW) across white matter anatomical tracts reveals positive associations with ET polygenic risk scores (PRS) in cerebellar spinal and frontal projection tracts (ORG anatomically curated fiber clustering atlas, Zhang et al., 2018). (A) Glassbrain representations of the t-statistic projections indicate stronger positive associations in the cerebellum. ORG atlas representation of the t-statistic in the MNI 152\_nlin\_asym\_09 template and axial, transverse and coronal slices is shown below. (B) Mosaic representation of the FDR-adjusted p-value projections indicate positive associations in the spinal, cerebellar, and bilateral frontal lobe projections.

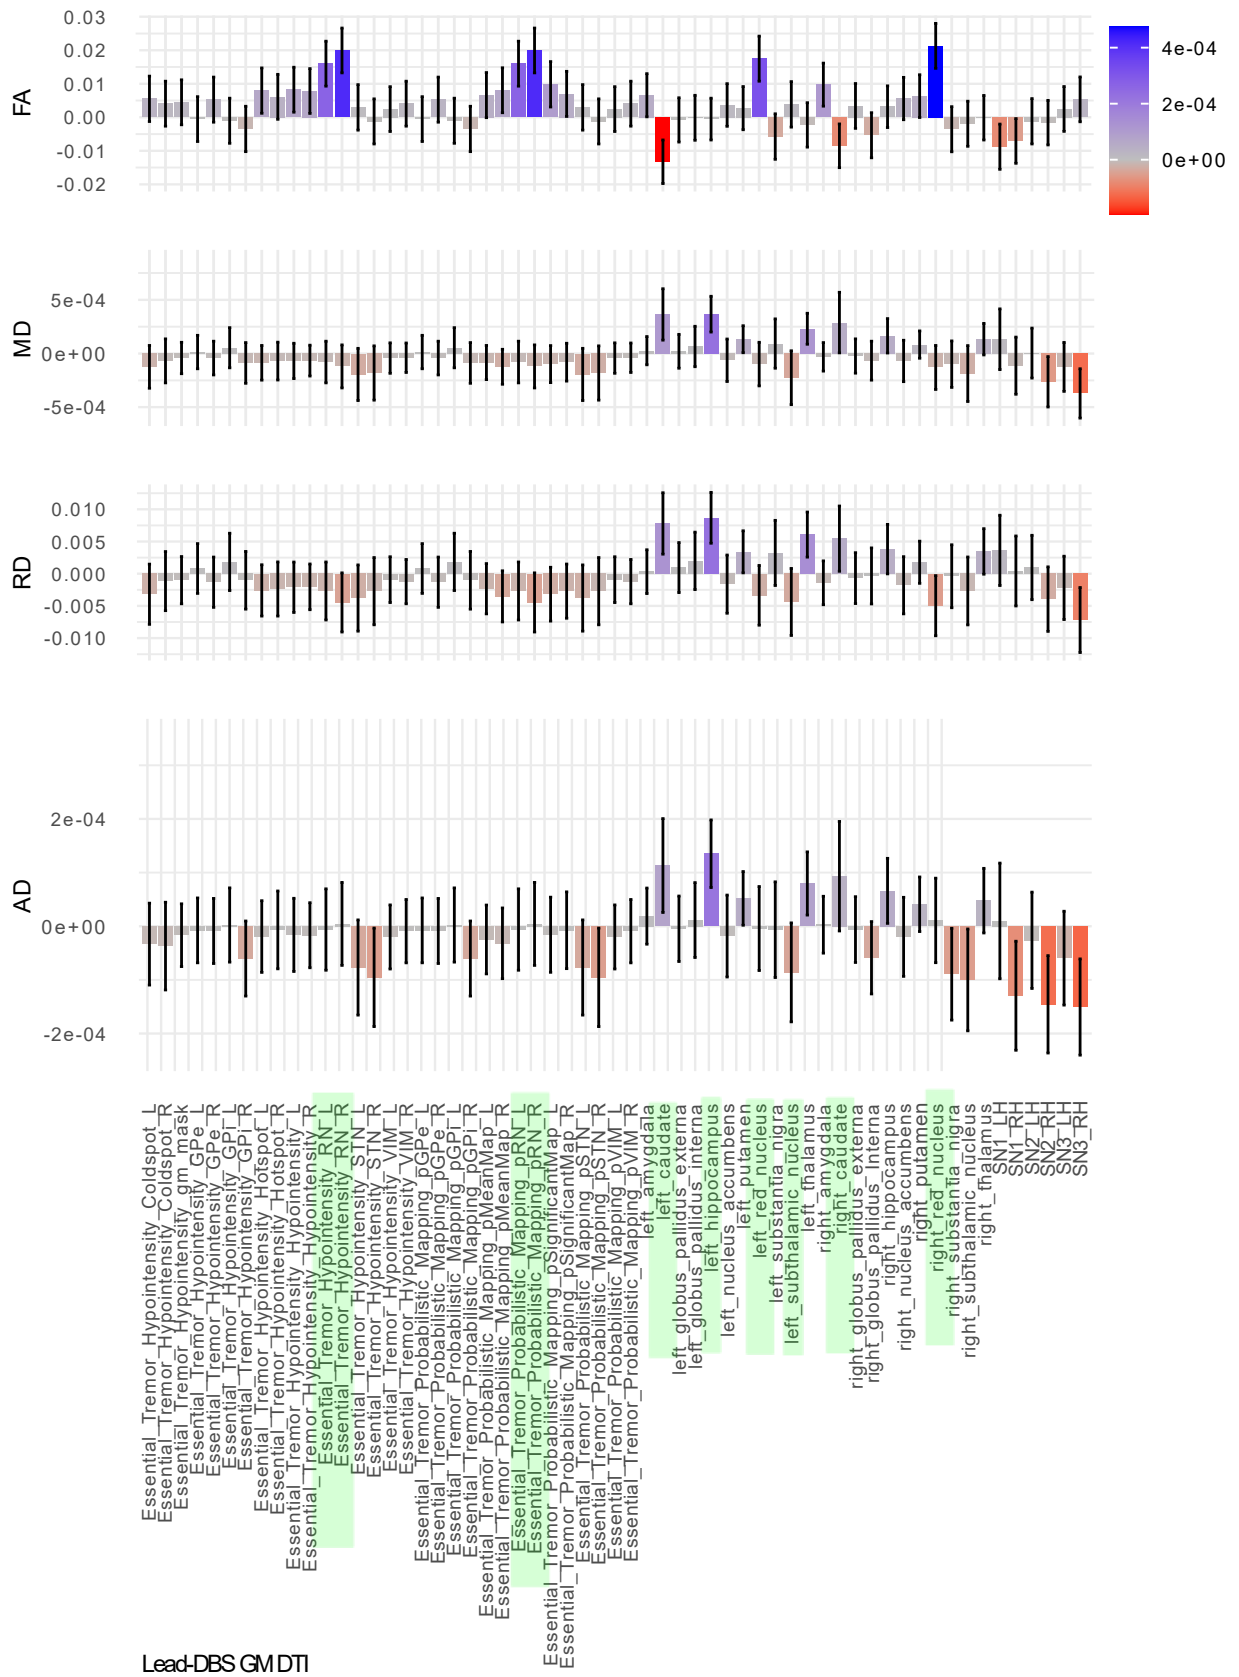

**Figure S3. Histograms ET PRS associations with grey matter diffusion-weighted magnetic resonance imaging in LeadDBS – red nucleus**

ET polygenic risk scores (PRS) regression coefficient histograms across Lead\_DBs atlases reveal red nucleus associations in fractional anisotropy (FA) and thalamic, striatal associations in mean diffusivity (MD). Measures of fractional anisotropy (FA), mean diffusivity (MD), radial diffusivity (RD), and axial diffusivity (AD).

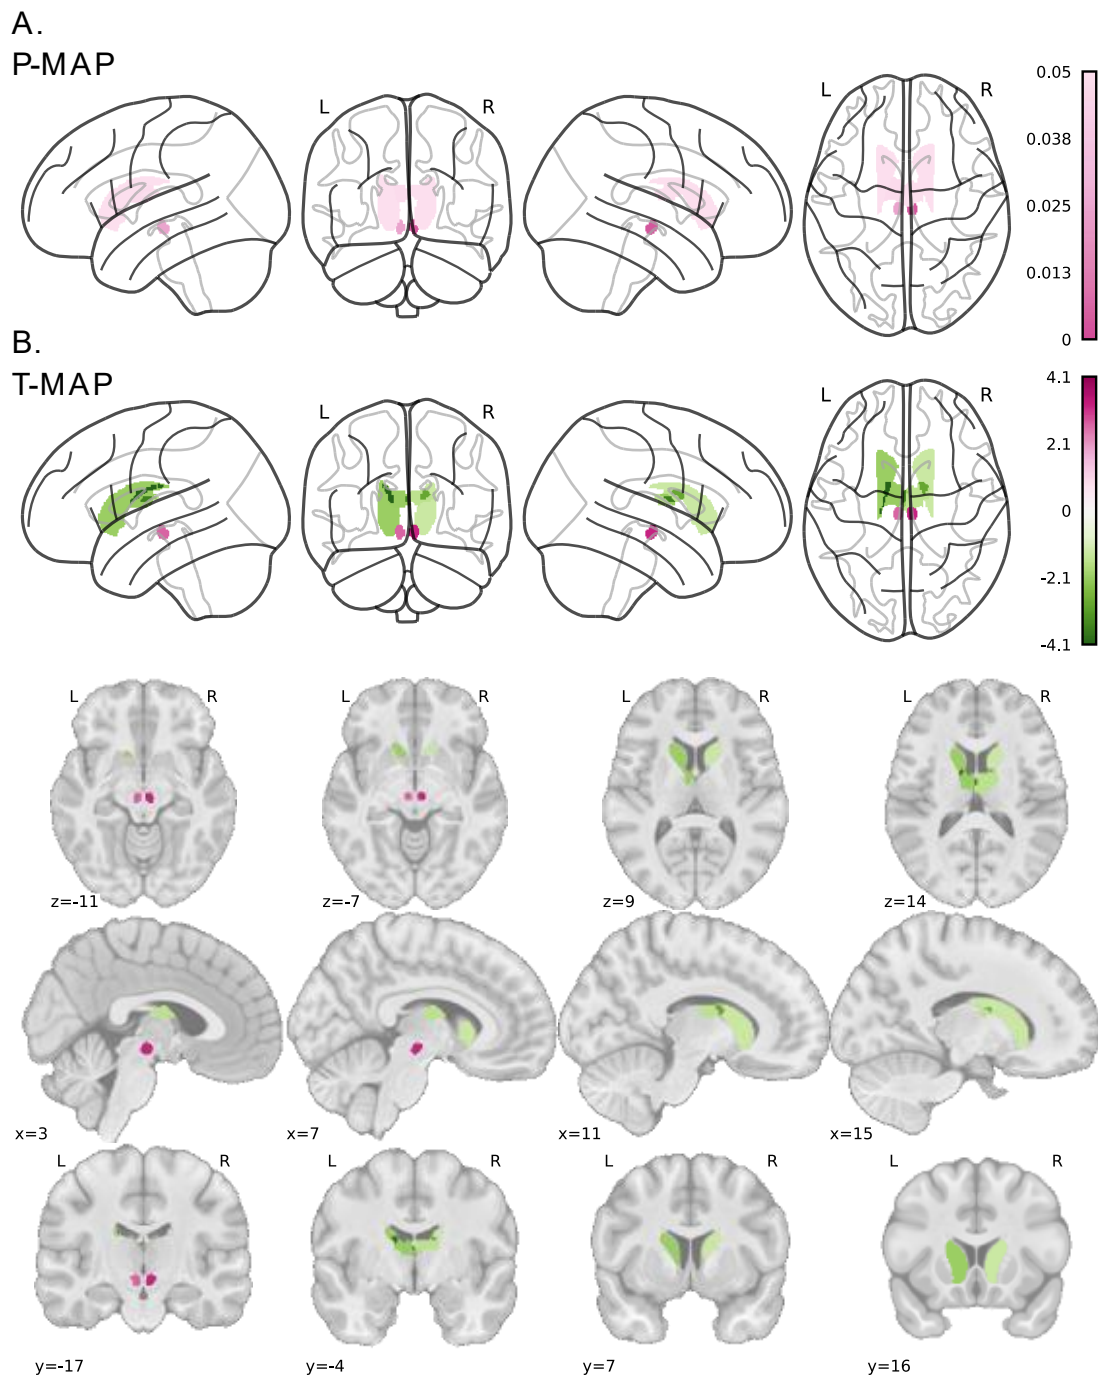

**Figure S4. Grey matter fractional anisotropy for red nucleus**

Fractional anisotropy (FA) in red nucleus (RN) and caudate (Lead-DBS Essential Tremor Probabilistic Mapping Nowacki 2022, and Essential Tremor Hypointensity, Neudorfer 2022) showing significant associations with ET polygenic risk score (PRS). (A) Glassbrain representation of the FDR adjusted p-value projections indicate stronger associations of FA and ET PRS in the bilateral RN. (B) Glassbrain representations of the t-statistic projections in these two regions indicate a positive association of FA in the RN and a negative association in the caudate. Mosaic representation of the t-statistic in the MNI I 152\_nlin\_asym\_09c template and axial, transverse and coronal slices is shown below.

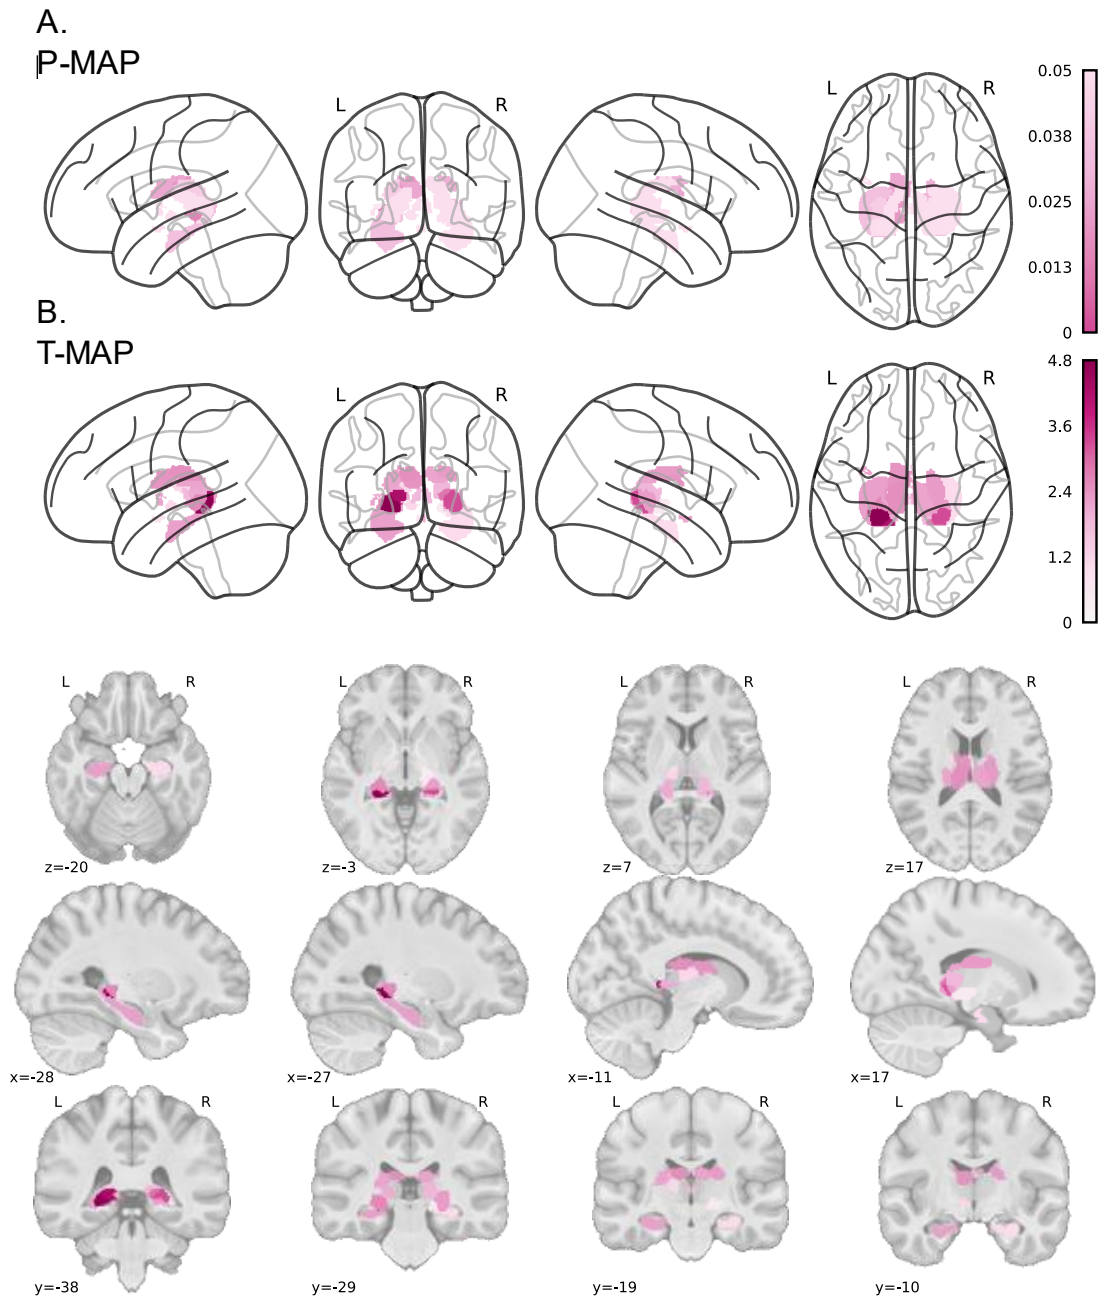

**Figure S5. Grey matter mean diffusivity for thalamus and hippocampus**

Mean diffusivity (MD) in functional thalamus and hippocampus (Lead-DBS Atlas of the Human Hypothalamus, Neudorfer & Germann 2020; Thalamic Functional Atlas Kumar 2017) showing significant associations with ET polygenic risk scores (PRS). (A) Glassbrain representation of the FDR adjusted p-value projections indicate stronger positive associations in the thalamus and weaker hypothalamic and hippocampus. (B) Glassbrain representations of the t-statistic projections indicate stronger positive associations in the posterior and ventral thalamic nuclei. A mosaic representation of the t-statistic in the MNI I 152\_nlin\_asym\_09 template and axial, transverse and coronal slices is shown below. Fig. 5A. ET PRS shows negative associations with cortical volume in superior parietal and superior frontal areas, in addition to precuneus and posterior cingulate areas. Freesurfer DK parcellation (Desikan et al., 2006).





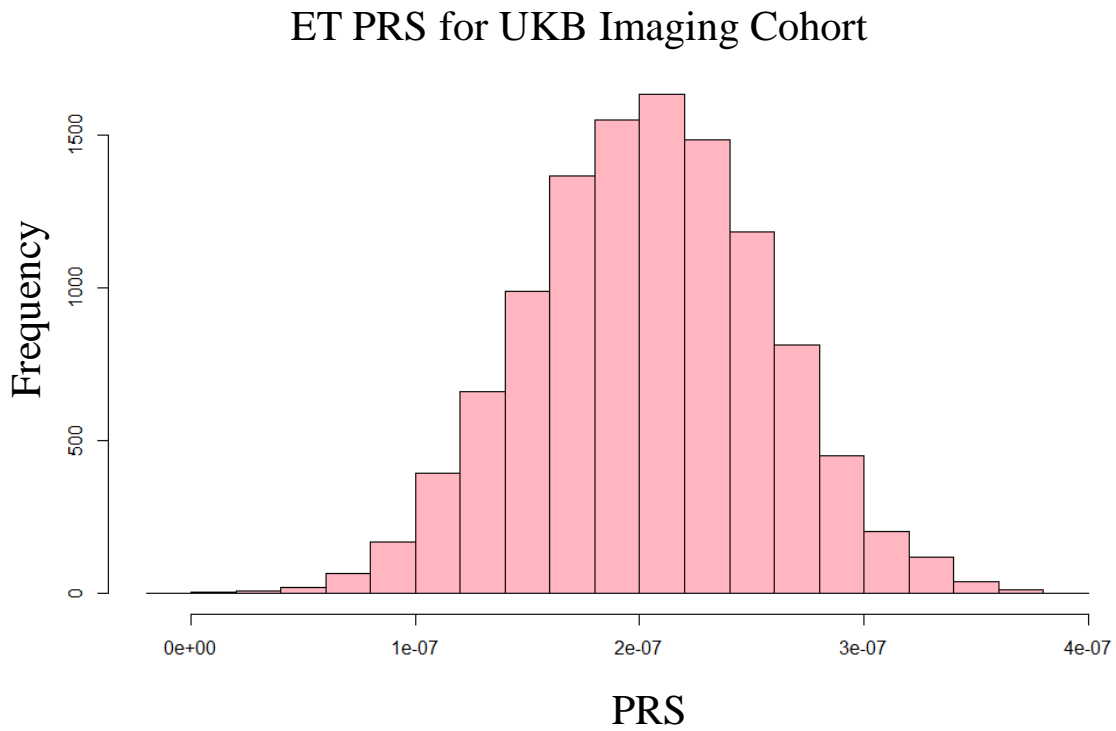

**Figure S7. Polygenic risk score distribution**

Distribution of ET polygenic risk scores calculated in UK Biobank (UKB) cohort.

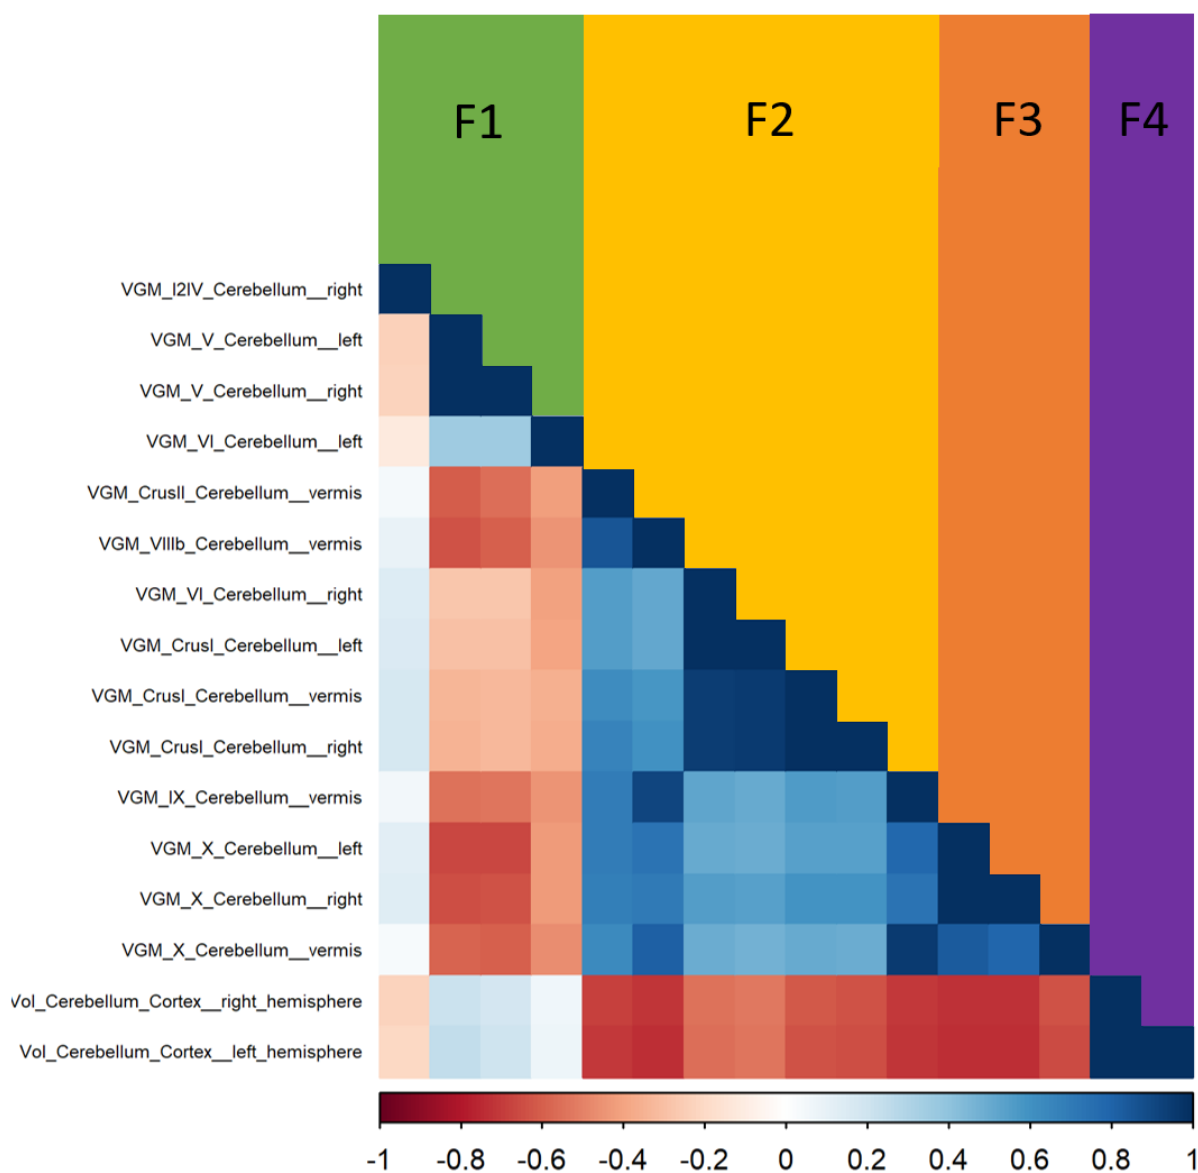

**Figure S8. Genetic correlation matrix**

Genetic correlation matrix of the 16 imaging derived phenotypes (IDPs) from BIG40 corresponding to regions of interest identified from ET polygenic risk score (PRS) associations. Genetic correlations of 1 indicate perfect overlap of genetic factors. The factors the IDPs were loaded onto are labeled and colored. Summary statistics from the factor F2 IDPs were used in Transcriptome-wide Structural Equation Modeling (T-SEM).



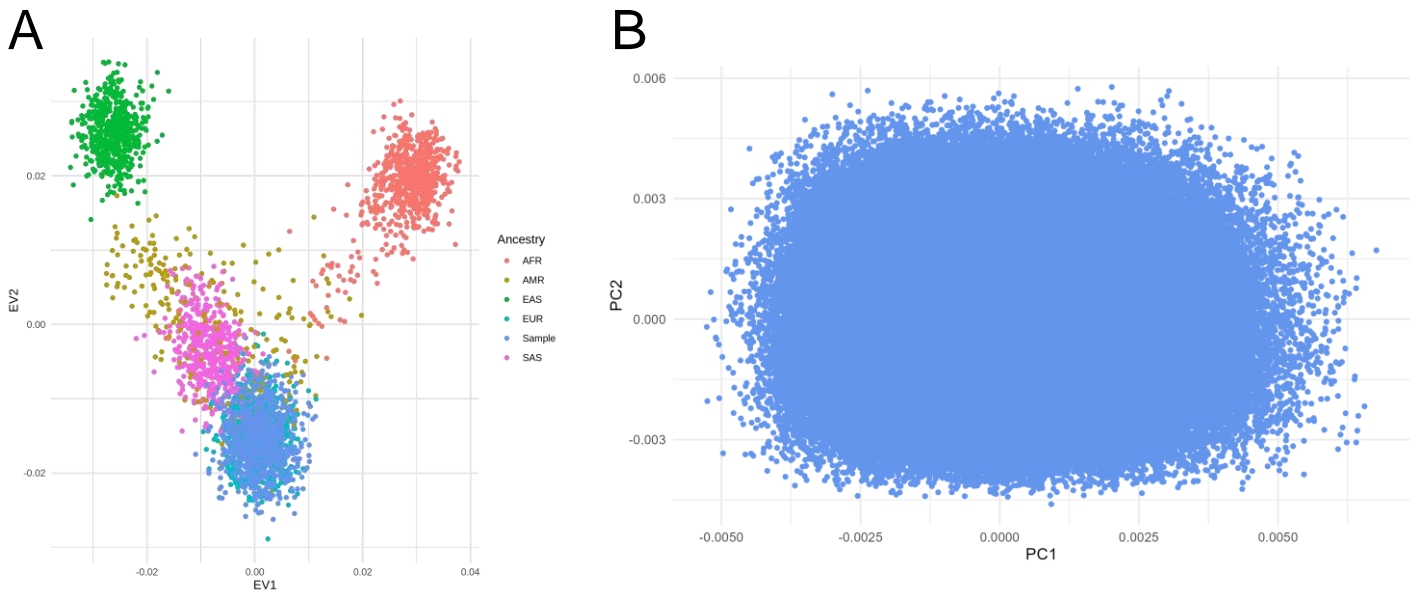

**Figure S9. Ancestry principal component analysis**

Genetic principal component analysis. (A) The first and second principal components of a random subset of 1000 samples from the cohort is taken and is compared to 1000 genomes reference panel. Samples overlap with references of European ancestry, showing that only samples of European ancestry were considered in the analysis. (B) The first and second principal components of all samples of the cohort are depicted, the lack of any substructures suggests individuals are of a similar genetic background which reduces the risk of confounding due to subpopulations or stratification.

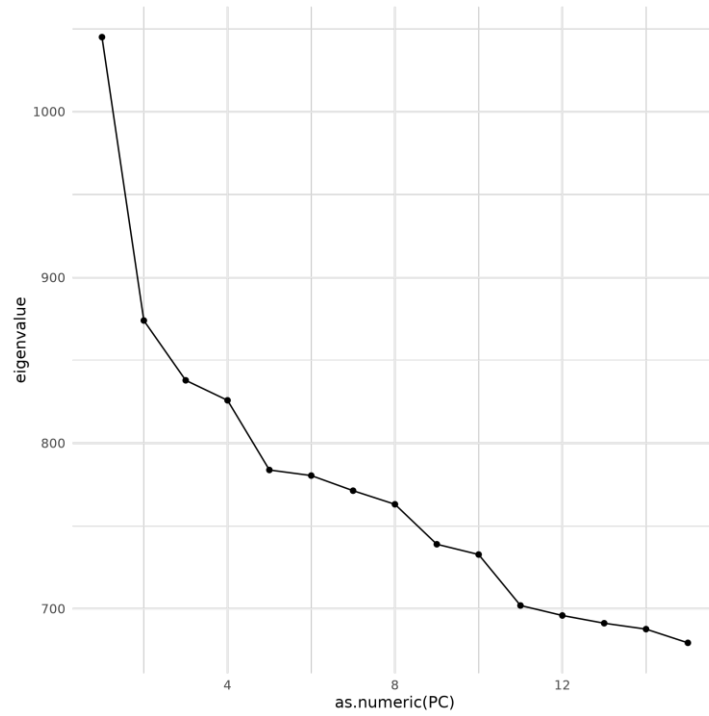

**Figure S10. Principal component screeplot**

Scree plot of top 15 genetic principal components of cohort. Polygenic scores were then corrected by regressing out the top 15 principal components.

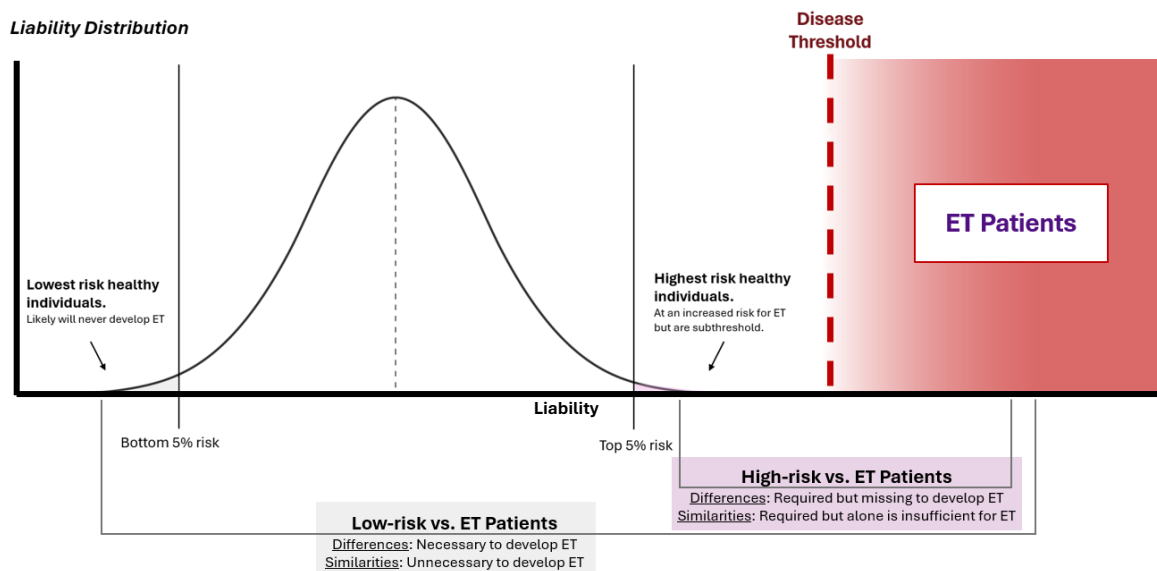

**Figure S11. Framework of ET genetic low and high risk healthy individual groups compared to ET patients analysis through liability distribution of risk model**

The liability distribution of a healthy population's liability towards developing ET remains below disease threshold. However, as risk accumulates, healthy individuals shift towards and may even surpass the disease threshold and develop ET. Healthy individuals with the lowest polygenic risk scores (PRS) are in the lowest risk group and will likely never develop ET. On the other side of the distribution, healthy individuals with the largest PRS are in the highest risk group and are at the greatest risk of developing ET yet remain subthreshold for disease. This model provides the framework for comparisons of brain morphometry between the genetically low-risk group and patients, and comparisons between the genetically high-risk group and patients provide unique insights into what vulnerability regions are necessary for ET development.

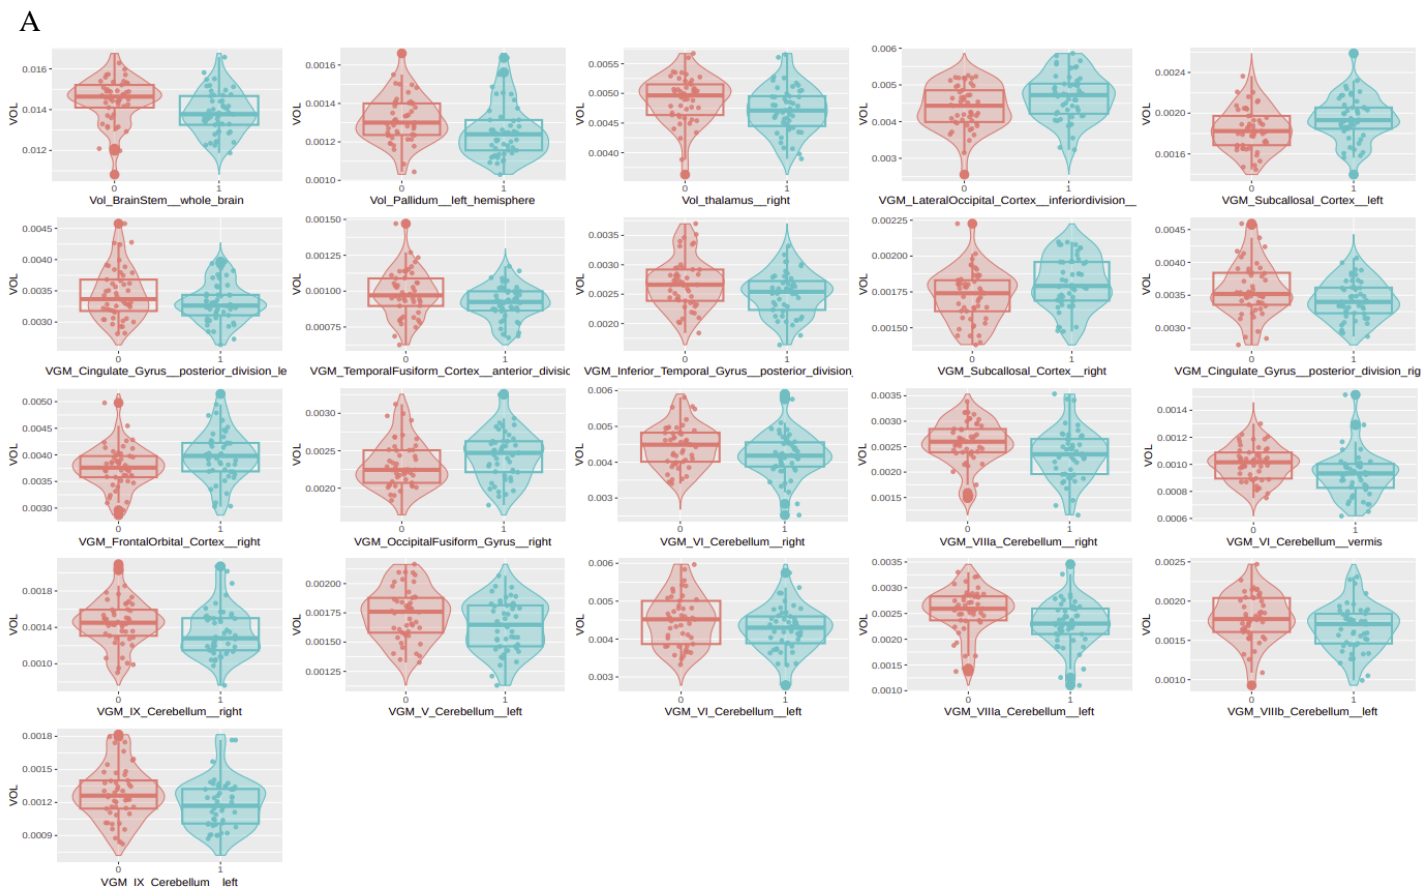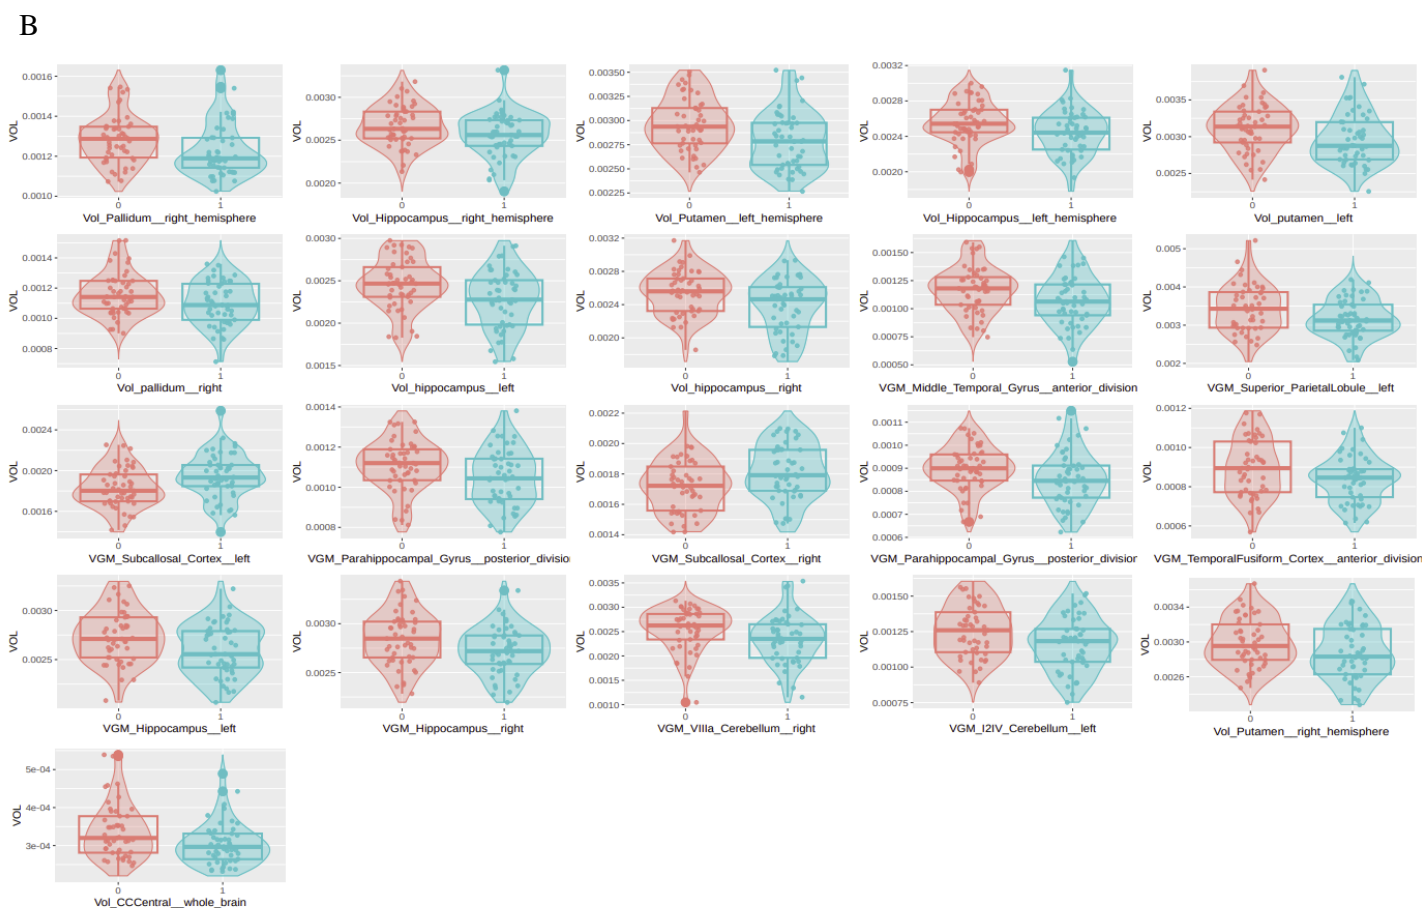

**Figure S12. Boxplots of cortical and subcortical volume differences between ET patients and low and high risk healthy controls**

Boxplots of cortical and subcortical volume differences between (1:1) matched ET patients and healthy controls (HC) (N:49) reveal regions normally associated with ET pathophysiology. These differences are more prominent in the ET vs low risk (LR) PRS group while fewer differences were found in the ET vs HR PRS group. (A) Depicts differences between the high risk group and patients. (B) Depicts differences between the low risk group and patients.
